# Supplementary material for: miR-155 Is a Positive Regulator of FcεRI-Induced Cyclooxygenase-2 Expression and Cytokine Production in Mast Cells
Source: Frontiers journal article supplement (doi:10.3389/falgy.2022.835776), 2022-04-18
Supplement: Table_1.XLS [file Table_1.XLS]

## Sheet: Simple Normalized Data
		S01 SMC1-cy3	S02 SMC2-cy3
Index	Reporter Name	Signal	Signal
1	hsa-let-7a-2-3p	0.0212262	2.51636
2	hsa-let-7a-3p	41.254	39.6824
3	hsa-let-7a-5p	8953.04	7869.42
4	hsa-let-7b-3p	18.6175	20.4587
5	hsa-let-7b-5p	2741.29	2166.97
6	hsa-let-7c-3p	1.95276	1.67258
7	hsa-let-7c-5p	5011.35	4455.11
8	hsa-let-7d-3p	29.755	35.1352
9	hsa-let-7d-5p	5708.47	5204.68
10	hsa-let-7e-3p	3.99196	1.6937
11	hsa-let-7e-5p	5044.01	4330.03
12	hsa-let-7f-1-3p	10.3733	10.9091
13	hsa-let-7f-2-3p	27.0828	22.1341
14	hsa-let-7f-5p	8894.74	7873.09
15	hsa-let-7g-3p	2.26935	4.71376
16	hsa-let-7g-5p	2743.45	2643.31
17	hsa-let-7i-3p	2.36103	3.04321
18	hsa-let-7i-5p	1141.39	1145.54
19	hsa-miR-1	2.65522	2.42302
20	hsa-miR-7-1-3p	49.4175	47.5314
21	hsa-miR-7-2-3p	0.0224406	2.12583
22	hsa-miR-7-5p	44.8804	67.2403
23	hsa-miR-9-3p	4.15677	5.52669
24	hsa-miR-9-5p	2.32841	12.0961
25	hsa-miR-10a-3p	7.80948	0.0043825
26	hsa-miR-10a-5p	328.963	296.958
27	hsa-miR-10b-3p	3.57788	0.00419493
28	hsa-miR-10b-5p	372.597	301.855
29	hsa-miR-15a-3p	5.06113	2.3331
30	hsa-miR-15a-5p	200.242	282.573
31	hsa-miR-15b-3p	20.946	24.1739
32	hsa-miR-15b-5p	1742.87	3056.2
33	hsa-miR-16-1-3p	3.2321	10.4441
34	hsa-miR-16-2-3p	18.9283	26.3694
35	hsa-miR-16-5p	3082.14	4573.56
36	hsa-miR-17-3p	4.05891	4.83177
37	hsa-miR-17-5p	98.825	117.611
38	hsa-miR-18a-3p	3.75157	0.170293
39	hsa-miR-18a-5p	11.9699	0.361547
40	hsa-miR-18b-3p	5.06631	2.94627
41	hsa-miR-18b-5p	2.00518	4.85219
42	hsa-miR-19a-3p	11.2438	0.821893
43	hsa-miR-19a-5p	0.30329	0.123232
44	hsa-miR-19b-1-5p	0.0380718	0.00262661
45	hsa-miR-19b-2-5p	4.00696	0.00431392
46	hsa-miR-19b-3p	47.499	33.5221
47	hsa-miR-20a-3p	3.8463	0.0648863
48	hsa-miR-20a-5p	90.2532	111.077
49	hsa-miR-20b-3p	0.0380718	0.00262661
50	hsa-miR-20b-5p	56.5177	59.6312
51	hsa-miR-21-3p	3.92581	1.42026
52	hsa-miR-21-5p	2234.43	2411.36
53	hsa-miR-22-3p	386.628	430.698
54	hsa-miR-22-5p	57.4144	65.3434
55	hsa-miR-23a-3p	5007.67	5198.53
56	hsa-miR-23a-5p	7.91123	3.76346
57	hsa-miR-23b-3p	4589.66	4698.06
58	hsa-miR-23b-5p	7.19309	4.37481
59	hsa-miR-23c	201.761	154.014
60	hsa-miR-24-1-5p	4.49719	0.375354
61	hsa-miR-24-2-5p	19.7076	14.8378
62	hsa-miR-24-3p	5194.86	5089.97
63	hsa-miR-25-3p	760.239	681.915
64	hsa-miR-25-5p	1.76843	0.11549
65	hsa-miR-26a-1-3p	0.659641	0.00262661
66	hsa-miR-26a-2-3p	6.50774	0.00452072
67	hsa-miR-26a-5p	5298.32	4984.55
68	hsa-miR-26b-3p	2.96832	0.00262661
69	hsa-miR-26b-5p	4630.65	4157.33
70	hsa-miR-27a-3p	683.912	716.634
71	hsa-miR-27a-5p	0.0380718	0.0737245
72	hsa-miR-27b-3p	178.393	182.287
73	hsa-miR-27b-5p	2.613	0.489823
74	hsa-miR-28-3p	57.0008	68.4812
75	hsa-miR-28-5p	113.251	145.412
76	hsa-miR-29a-3p	890.246	770.434
77	hsa-miR-29a-5p	6.55008	3.9946
78	hsa-miR-29b-1-5p	4.17431	2.22104
79	hsa-miR-29b-2-5p	2.6119	2.82588
80	hsa-miR-29b-3p	162.226	183.074
81	hsa-miR-29c-3p	530.828	328.652
82	hsa-miR-29c-5p	15.6497	6.68059
83	hsa-miR-30a-3p	21.2252	4.57933
84	hsa-miR-30a-5p	605.296	713.609
85	hsa-miR-30b-3p	35.7563	28.4912
86	hsa-miR-30b-5p	2671.73	2965.25
87	hsa-miR-30c-1-3p	84.7349	83.1886
88	hsa-miR-30c-2-3p	13.7174	3.79995
89	hsa-miR-30c-5p	2630.95	3016.06
90	hsa-miR-30d-3p	2.0575	1.0646
91	hsa-miR-30d-5p	245.675	305.736
92	hsa-miR-30e-3p	122.414	124.466
93	hsa-miR-30e-5p	522.63	619.07
94	hsa-miR-31-3p	1.89103	1.61058
95	hsa-miR-31-5p	6.01292	5.27886
96	hsa-miR-32-3p	19.1617	17.5852
97	hsa-miR-32-5p	10.4818	9.02789
98	hsa-miR-33a-3p	8.31282	2.97768
99	hsa-miR-33a-5p	3.12111	0.799111
100	hsa-miR-33b-3p	3.04302	0.299895
101	hsa-miR-33b-5p	0.997153	0.284252
102	hsa-miR-34a-3p	6.75735	5.83597
103	hsa-miR-34a-5p	86.0439	111.062
104	hsa-miR-34b-3p	6.42791	3.25168
105	hsa-miR-34b-5p	13.4491	11.1862
106	hsa-miR-34c-3p	8.05797	2.46356
107	hsa-miR-34c-5p	1.24021	1.63248
108	hsa-miR-92a-1-5p	3.20924	1.22595
109	hsa-miR-92a-2-5p	3.80822	8.54782
110	hsa-miR-92a-3p	434.278	454.267
111	hsa-miR-92b-3p	99.8151	143.892
112	hsa-miR-92b-5p	2.2987	3.39869
113	hsa-miR-93-3p	7.78703	10.9857
114	hsa-miR-93-5p	102.949	122.544
115	hsa-miR-95-3p	2.79356	9.67003
116	hsa-miR-95-5p	1.4503	9.56485
117	hsa-miR-96-3p	1.77787	8.95218
118	hsa-miR-96-5p	0.928817	4.08067
119	hsa-miR-98-3p	9.30578	20.5749
120	hsa-miR-98-5p	1791.24	1174.76
121	hsa-miR-99a-3p	3.34505	7.82511
122	hsa-miR-99a-5p	662.959	774.477
123	hsa-miR-99b-3p	5.75633	10.7109
124	hsa-miR-99b-5p	446.789	529.577
125	hsa-miR-100-3p	4.64789	3.71689
126	hsa-miR-100-5p	708.587	562.835
127	hsa-miR-101-3p	21.6415	24.8108
128	hsa-miR-101-5p	1.38149	2.08776
129	hsa-miR-103a-2-5p	5.43473	2.85657
130	hsa-miR-103a-3p	917.491	883.715
131	hsa-miR-103b	3.03478	5.23632
132	hsa-miR-105-3p	0.290887	1.94329
133	hsa-miR-105-5p	4.7375	2.32369
134	hsa-miR-106a-3p	3.15397	0.359446
135	hsa-miR-106a-5p	86.2059	103.889
136	hsa-miR-106b-3p	15.6381	6.59801
137	hsa-miR-106b-5p	83.2046	75.9008
138	hsa-miR-107	883.054	871.869
139	hsa-miR-122-3p	4.40525	0.00262661
140	hsa-miR-122-5p	2.08478	0.00262661
141	hsa-miR-124-3p	0.366743	0.370471
142	hsa-miR-124-5p	0.0380718	0.00262661
143	hsa-miR-125a-3p	9.28346	8.89304
144	hsa-miR-125a-5p	4521.33	3601.2
145	hsa-miR-125b-1-3p	0.458507	6.19385
146	hsa-miR-125b-2-3p	13.3264	19.5153
147	hsa-miR-125b-5p	1043.22	961.165
148	hsa-miR-126-3p	203.264	197.39
149	hsa-miR-126-5p	0.0380718	0.398574
150	hsa-miR-127-3p	1.9173	6.09565
151	hsa-miR-127-5p	0.585521	1.80273
152	hsa-miR-128-1-5p	2.07405	1.13426
153	hsa-miR-128-2-5p	2.9985	0.0039863
154	hsa-miR-128-3p	40.1261	42.2342
155	hsa-miR-129-1-3p	4.00701	0.428317
156	hsa-miR-129-2-3p	0.906094	0.00262661
157	hsa-miR-129-5p	1.88694	0.273789
158	hsa-miR-130a-3p	28.3533	10.0811
159	hsa-miR-130a-5p	2.78824	0.00379329
160	hsa-miR-130b-3p	78.2376	87.7387
161	hsa-miR-130b-5p	37.9116	23.7506
162	hsa-miR-132-3p	57.4389	209.436
163	hsa-miR-132-5p	5.22659	24.2571
164	hsa-miR-133a-3p	1.43215	0.0679186
165	hsa-miR-133a-5p	0.0380718	1.6972
166	hsa-miR-133b	6.82332	1.07635
167	hsa-miR-134-3p	0.0380718	0.00262661
168	hsa-miR-134-5p	5.23611	0.00438226
169	hsa-miR-135a-3p	3.93598	0.114477
170	hsa-miR-135a-5p	0.652239	1.83453
171	hsa-miR-135b-3p	0.68684	1.02392
172	hsa-miR-135b-5p	2.48501	1.13974
173	hsa-miR-136-3p	1.61459	0.140021
174	hsa-miR-136-5p	0.188127	0.00262661
175	hsa-miR-137	9.00563	5.77356
176	hsa-miR-138-1-3p	1.98111	1.19511
177	hsa-miR-138-2-3p	3.65421	0.289157
178	hsa-miR-138-5p	0.0380718	0.0963113
179	hsa-miR-139-3p	3.42697	2.02887
180	hsa-miR-139-5p	7.18442	3.52591
181	hsa-miR-140-3p	1108.48	1833.77
182	hsa-miR-140-5p	36.3179	32.7484
183	hsa-miR-141-3p	0.616047	0.334906
184	hsa-miR-141-5p	2.21527	0.23403
185	hsa-miR-142-3p	229.905	193.889
186	hsa-miR-142-5p	233.049	262.806
187	hsa-miR-143-3p	6.18444	2.09212
188	hsa-miR-143-5p	0.0380718	0.00262661
189	hsa-miR-144-3p	0.0380718	0.00262661
190	hsa-miR-144-5p	0.0380718	0.00262661
191	hsa-miR-145-3p	0.0380718	0.00262661
192	hsa-miR-145-5p	7.98356	7.4546
193	hsa-miR-146a-3p	6.88556	4.52834
194	hsa-miR-146a-5p	6036.45	9149.97
195	hsa-miR-146b-3p	5.11318	4.52066
196	hsa-miR-146b-5p	2559.85	3194.25
197	hsa-miR-147a	2.57954	2.80204
198	hsa-miR-147b	1.07432	2.18695
199	hsa-miR-148a-3p	968.964	1095.63
200	hsa-miR-148a-5p	17.9946	21.756
201	hsa-miR-148b-3p	379.564	372.793
202	hsa-miR-148b-5p	4.05188	3.21169
203	hsa-miR-149-3p	547.066	400.124
204	hsa-miR-149-5p	3.62261	0.510725
205	hsa-miR-150-3p	2.90173	2.1981
206	hsa-miR-150-5p	17.2454	14.1407
207	hsa-miR-151a-3p	34.1516	45.4623
208	hsa-miR-151a-5p	437.683	498.791
209	hsa-miR-151b	434.363	501.899
210	hsa-miR-152-3p	255.136	324.641
211	hsa-miR-152-5p	0.022936	0.942122
212	hsa-miR-153-3p	0.637211	2.41239
213	hsa-miR-153-5p	0.0255213	0.302645
214	hsa-miR-154-3p	1.54193	2.08325
215	hsa-miR-154-5p	5.07047	4.48057
216	hsa-miR-155-3p	0.318666	2.45394
217	hsa-miR-155-5p	35.7225	93.0931
218	hsa-miR-181a-2-3p	2.0864	4.81037
219	hsa-miR-181a-3p	4.72909	1.82648
220	hsa-miR-181a-5p	579.638	625.691
221	hsa-miR-181b-3p	0.632416	1.19728
222	hsa-miR-181b-5p	106.315	104.613
223	hsa-miR-181c-3p	2.07436	0.062568
224	hsa-miR-181c-5p	86.8084	105.362
225	hsa-miR-181d-3p	0.021657	1.6541
226	hsa-miR-181d-5p	77.7056	84.048
227	hsa-miR-182-3p	2.10183	0.235276
228	hsa-miR-182-5p	2.3054	1.7217
229	hsa-miR-183-3p	2.56391	1.44342
230	hsa-miR-183-5p	1.48593	1.81125
231	hsa-miR-184	4.8829	1.03475
232	hsa-miR-185-3p	2.32784	1.03335
233	hsa-miR-185-5p	91.5921	124.864
234	hsa-miR-186-3p	6.88189	0.520895
235	hsa-miR-186-5p	144.005	175.269
236	hsa-miR-187-3p	2.16771	1.52247
237	hsa-miR-187-5p	6.35286	3.38737
238	hsa-miR-188-3p	2.25447	0.00262661
239	hsa-miR-188-5p	5.97972	1.5632
240	hsa-miR-190a-3p	0.0380718	0.00262661
241	hsa-miR-190a-5p	4.30041	0.00262661
242	hsa-miR-190b	0.0970679	0.00262661
243	hsa-miR-191-3p	2.99453	0.0039559
244	hsa-miR-191-5p	4188.39	5193.6
245	hsa-miR-192-3p	2.18693	3.47259
246	hsa-miR-192-5p	11.0759	6.18865
247	hsa-miR-193a-3p	9.24886	3.61107
248	hsa-miR-193a-5p	23.0905	15.1554
249	hsa-miR-193b-3p	4.02119	3.74921
250	hsa-miR-193b-5p	4.59133	0.792584
251	hsa-miR-194-3p	0.571109	0.0115231
252	hsa-miR-194-5p	6.81784	0.164895
253	hsa-miR-195-3p	7.65085	2.32986
254	hsa-miR-195-5p	237.95	141.166
255	hsa-miR-196a-3p	4.94298	0.0042781
256	hsa-miR-196a-5p	6.5717	0.00447898
257	hsa-miR-196b-3p	3.97897	0.00404838
258	hsa-miR-196b-5p	11.0586	0.208997
259	hsa-miR-197-3p	79.2397	66.4368
260	hsa-miR-197-5p	11.5953	0.761342
261	hsa-miR-198	0.721554	0.00262661
262	hsa-miR-199a-3p	451.549	441.861
263	hsa-miR-199a-5p	86.5853	66.6394
264	hsa-miR-199b-5p	37.2433	22.8178
265	hsa-miR-200a-3p	4.21092	0.208981
266	hsa-miR-200a-5p	0.0380718	0.102527
267	hsa-miR-200b-3p	21.6084	1.64294
268	hsa-miR-200b-5p	3.23383	0.885171
269	hsa-miR-200c-3p	11.3583	4.30522
270	hsa-miR-200c-5p	4.61281	0.699525
271	hsa-miR-202-3p	6.63682	0.00442815
272	hsa-miR-202-5p	18.0496	11.9366
273	hsa-miR-203a	7.89217	0.1071
274	hsa-miR-203b-3p	0.72233	0.382463
275	hsa-miR-203b-5p	0.0494781	0.00262661
276	hsa-miR-204-3p	2.41065	1.25844
277	hsa-miR-204-5p	0.449692	0.00262661
278	hsa-miR-205-3p	0.0380718	0.00262661
279	hsa-miR-205-5p	1.01714	0.370283
280	hsa-miR-206	1.48055	4.63116
281	hsa-miR-208a-3p	0.0380718	0.00262661
282	hsa-miR-208a-5p	11.7126	2.03435
283	hsa-miR-208b-3p	0.0380718	0.00262661
284	hsa-miR-208b-5p	0.0249632	0.572093
285	hsa-miR-210-3p	15.26	7.54022
286	hsa-miR-210-5p	5.11431	2.27733
287	hsa-miR-211-3p	6.78392	4.28613
288	hsa-miR-211-5p	1.82073	2.13086
289	hsa-miR-212-3p	10.0515	53.7235
290	hsa-miR-212-5p	2.99854	2.82081
291	hsa-miR-214-3p	154.982	284.823
292	hsa-miR-214-5p	0.418569	1.85357
293	hsa-miR-215-3p	4.1032	0.534981
294	hsa-miR-215-5p	2.855	1.7414
295	hsa-miR-216a-3p	1.13258	1.08692
296	hsa-miR-216a-5p	0.0227158	1.07122
297	hsa-miR-216b-3p	8.50103	1.56027
298	hsa-miR-216b-5p	0.0380718	0.204219
299	hsa-miR-217	1.34909	1.85351
300	hsa-miR-218-1-3p	0.771537	1.11038
301	hsa-miR-218-2-3p	0.889416	1.63401
302	hsa-miR-218-5p	2.44963	5.86395
303	hsa-miR-219a-1-3p	0.633846	5.9954
304	hsa-miR-219a-2-3p	0.535898	2.32968
305	hsa-miR-219a-5p	3.758	2.25219
306	hsa-miR-219b-3p	1.92205	5.13197
307	hsa-miR-219b-5p	9.58475	4.20307
308	hsa-miR-221-3p	1104.4	1178.7
309	hsa-miR-221-5p	23.2139	35.579
310	hsa-miR-222-3p	1065.4	1147.1
311	hsa-miR-222-5p	9.94433	10.9147
312	hsa-miR-223-3p	929.79	810.072
313	hsa-miR-223-5p	4.35433	9.61613
314	hsa-miR-224-3p	1.05476	0.324648
315	hsa-miR-224-5p	1.18808	0.993899
316	hsa-miR-296-3p	0.0380718	0.0379115
317	hsa-miR-296-5p	8.44787	4.56108
318	hsa-miR-297	2.48566	4.0362
319	hsa-miR-298	2.03327	1.0812
320	hsa-miR-299-3p	2.48749	2.55161
321	hsa-miR-299-5p	7.75415	0.321966
322	hsa-miR-300	0.0707453	0.00383217
323	hsa-miR-301a-3p	7.08715	0.0043961
324	hsa-miR-301a-5p	0.0380718	0.0493214
325	hsa-miR-301b	2.49039	2.96722
326	hsa-miR-302a-3p	0.0380718	0.0682323
327	hsa-miR-302a-5p	0.0380718	0.00262661
328	hsa-miR-302b-3p	0.0380718	0.00262661
329	hsa-miR-302b-5p	0.0380718	0.00262661
330	hsa-miR-302c-3p	0.0380718	0.00262661
331	hsa-miR-302c-5p	7.36244	0.147449
332	hsa-miR-302d-3p	0.0380718	0.00262661
333	hsa-miR-302d-5p	0.0380718	0.00262661
334	hsa-miR-302e	0.0380718	0.00262661
335	hsa-miR-302f	0.0380718	0.00262661
336	hsa-miR-320a	78.754	88.51
337	hsa-miR-320b	57.0132	58.0347
338	hsa-miR-320c	60.1767	65.1558
339	hsa-miR-320d	64.1896	41.1082
340	hsa-miR-320e	53.4503	51.0056
341	hsa-miR-323a-3p	3.3309	0.0040259
342	hsa-miR-323a-5p	4.14954	0.00324421
343	hsa-miR-323b-3p	13.9064	0.389124
344	hsa-miR-323b-5p	3.05938	0.64836
345	hsa-miR-324-3p	14.844	7.92075
346	hsa-miR-324-5p	50.4812	43.473
347	hsa-miR-325	0.0380718	0.0363038
348	hsa-miR-326	2.51622	0.150371
349	hsa-miR-328-3p	11.1694	0.91074
350	hsa-miR-328-5p	239.71	172.344
351	hsa-miR-329-3p	6.17587	0.919594
352	hsa-miR-329-5p	6.15478	5.1342
353	hsa-miR-330-3p	17.3606	1.25755
354	hsa-miR-330-5p	0.0380718	0.288118
355	hsa-miR-331-3p	38.1774	20.904
356	hsa-miR-331-5p	2.88054	0.0641332
357	hsa-miR-335-3p	0.960788	0.220636
358	hsa-miR-335-5p	6.57984	4.86919
359	hsa-miR-337-3p	9.16512	0.673544
360	hsa-miR-337-5p	0.631539	0.00262661
361	hsa-miR-338-3p	13.8526	3.51757
362	hsa-miR-338-5p	27.083	26.1584
363	hsa-miR-339-3p	10.1295	4.36012
364	hsa-miR-339-5p	11.1325	2.70469
365	hsa-miR-340-3p	17.4724	10.9968
366	hsa-miR-340-5p	76.3088	108.956
367	hsa-miR-342-3p	254.234	258.505
368	hsa-miR-342-5p	8.38726	5.59975
369	hsa-miR-345-3p	1.85386	1.36242
370	hsa-miR-345-5p	19.2914	16.7608
371	hsa-miR-346	4.86912	0.500338
372	hsa-miR-361-3p	13.2688	17.8048
373	hsa-miR-361-5p	127.643	153.084
374	hsa-miR-362-3p	11.6615	8.1596
375	hsa-miR-362-5p	67.5451	85.2121
376	hsa-miR-363-3p	3.39843	1.17618
377	hsa-miR-363-5p	4.7929	2.5562
378	hsa-miR-365a-3p	30.6234	22.4701
379	hsa-miR-365a-5p	12.4702	0.395864
380	hsa-miR-365b-5p	0.41524	0.164104
381	hsa-miR-367-3p	1.33736	0.201245
382	hsa-miR-367-5p	1.04602	1.54439
383	hsa-miR-369-3p	8.62871	2.61022
384	hsa-miR-369-5p	4.62052	0.935494
385	hsa-miR-370-3p	1.39373	0.00262661
386	hsa-miR-370-5p	0.0380718	0.00262661
387	hsa-miR-371a-3p	0.0380718	0.00262661
388	hsa-miR-371a-5p	0.0507108	0.721219
389	hsa-miR-371b-3p	5.08901	0.442647
390	hsa-miR-371b-5p	54.2808	42.2935
391	hsa-miR-372-3p	0.0242967	0.53158
392	hsa-miR-372-5p	0.0380718	0.172481
393	hsa-miR-373-3p	0.0380718	0.00262661
394	hsa-miR-373-5p	1.20306	1.25848
395	hsa-miR-374a-3p	0.0380718	0.00262661
396	hsa-miR-374a-5p	304.131	237.805
397	hsa-miR-374b-3p	2.77796	0.00262661
398	hsa-miR-374b-5p	655.606	641.304
399	hsa-miR-374c-3p	4.74185	2.59461
400	hsa-miR-374c-5p	394.041	355.969
401	hsa-miR-375	3.14281	0.0575092
402	hsa-miR-376a-2-5p	2.4628	0.923454
403	hsa-miR-376a-3p	7.79185	6.58691
404	hsa-miR-376a-5p	1.26766	1.37749
405	hsa-miR-376b-3p	2.58593	2.66158
406	hsa-miR-376b-5p	2.61004	2.10041
407	hsa-miR-376c-3p	53.7526	90.4623
408	hsa-miR-376c-5p	2.78304	5.5251
409	hsa-miR-377-3p	4.97173	5.41419
410	hsa-miR-377-5p	1.43472	2.4943
411	hsa-miR-378a-3p	433.831	506.205
412	hsa-miR-378a-5p	16.0264	15.8548
413	hsa-miR-378b	17.0366	8.89522
414	hsa-miR-378c	52.9517	66.0739
415	hsa-miR-378d	107.62	151.516
416	hsa-miR-378e	229.714	338.72
417	hsa-miR-378f	59.0677	89.1732
418	hsa-miR-378g	105.047	168.983
419	hsa-miR-378h	5.89853	4.43331
420	hsa-miR-378i	89.3423	147.75
421	hsa-miR-378j	13.5342	10.597
422	hsa-miR-379-3p	0.0230643	1.17739
423	hsa-miR-379-5p	6.5007	13.8801
424	hsa-miR-380-3p	1.66103	0.519777
425	hsa-miR-380-5p	0.825337	1.57904
426	hsa-miR-381-3p	0.0205152	3.03492
427	hsa-miR-381-5p	20.7466	9.07581
428	hsa-miR-382-3p	2.44081	5.35999
429	hsa-miR-382-5p	2.26322	11.0733
430	hsa-miR-383-3p	1.75935	7.27655
431	hsa-miR-383-5p	4.14671	9.77829
432	hsa-miR-384	2.13867	4.39031
433	hsa-miR-409-3p	6.46538	4.15248
434	hsa-miR-409-5p	7.18778	0.294123
435	hsa-miR-410-3p	3.28376	1.70528
436	hsa-miR-410-5p	4.11426	0.16678
437	hsa-miR-411-3p	5.7454	4.1953
438	hsa-miR-411-5p	1.89857	2.61575
439	hsa-miR-412-3p	0.640859	0.00262661
440	hsa-miR-412-5p	3.24295	0.00336859
441	hsa-miR-421	17.3465	4.95322
442	hsa-miR-422a	343.089	362.405
443	hsa-miR-423-3p	8.81292	3.71635
444	hsa-miR-423-5p	362.61	450.36
445	hsa-miR-424-3p	1.27753	0.0037462
446	hsa-miR-424-5p	3.40075	0.00408562
447	hsa-miR-425-3p	22.5958	6.9407
448	hsa-miR-425-5p	206.334	302.892
449	hsa-miR-429	1.84005	0.366195
450	hsa-miR-431-3p	0.140537	0.226415
451	hsa-miR-431-5p	0.603161	0.993973
452	hsa-miR-432-3p	6.94713	11.3436
453	hsa-miR-432-5p	3.835	6.32954
454	hsa-miR-433-3p	1.02827	0.770122
455	hsa-miR-433-5p	3.39663	0.188897
456	hsa-miR-448	1.17246	1.28289
457	hsa-miR-449a	3.182	0.215897
458	hsa-miR-449b-3p	3.93531	0.0121654
459	hsa-miR-449b-5p	3.20235	0.00421518
460	hsa-miR-449c-3p	2.23866	1.02954
461	hsa-miR-449c-5p	6.76136	0.763397
462	hsa-miR-450a-1-3p	0.0240901	1.42493
463	hsa-miR-450a-2-3p	0.956591	2.99534
464	hsa-miR-450a-5p	14.6501	3.81318
465	hsa-miR-450b-3p	0.176985	3.49053
466	hsa-miR-450b-5p	2.23132	4.44346
467	hsa-miR-451a	5.59504	12.4403
468	hsa-miR-451b	3.31969	7.08569
469	hsa-miR-452-3p	0.923549	3.49598
470	hsa-miR-452-5p	0.0380718	0.0536738
471	hsa-miR-454-3p	150.602	139.188
472	hsa-miR-454-5p	6.76717	0.00454519
473	hsa-miR-455-3p	10.768	4.97593
474	hsa-miR-455-5p	1.69213	0.0715056
475	hsa-miR-466	349.773	319.425
476	hsa-miR-483-3p	3.83575	1.26941
477	hsa-miR-483-5p	28.2785	32.6351
478	hsa-miR-484	26.5795	29.0895
479	hsa-miR-485-3p	3.06698	1.39865
480	hsa-miR-485-5p	0.296041	1.72412
481	hsa-miR-486-3p	49.5893	88.0752
482	hsa-miR-486-5p	4.85624	0.0736993
483	hsa-miR-487a-3p	5.23243	0.00438402
484	hsa-miR-487a-5p	0.854384	0.00262661
485	hsa-miR-487b-3p	7.93715	4.27655
486	hsa-miR-487b-5p	0.0380718	0.00262661
487	hsa-miR-488-3p	0.0380718	0.00262661
488	hsa-miR-488-5p	0.0380718	0.00262661
489	hsa-miR-489-3p	0.0380718	0.00262661
490	hsa-miR-489-5p	0.0380718	0.00262661
491	hsa-miR-490-3p	0.0380718	0.00262661
492	hsa-miR-490-5p	0.0380718	0.00262661
493	hsa-miR-491-3p	0.128835	0.00262661
494	hsa-miR-491-5p	2.74844	2.1056
495	hsa-miR-492	0.0380718	0.180049
496	hsa-miR-493-3p	2.65512	0.812084
497	hsa-miR-493-5p	10.1147	0.88603
498	hsa-miR-494-3p	244.312	227.299
499	hsa-miR-494-5p	4.41241	0.752067
500	hsa-miR-495-3p	2.35016	0.360943
501	hsa-miR-495-5p	3.34205	0.237119
502	hsa-miR-496	3.34303	0.408046
503	hsa-miR-497-3p	0.0553934	0.00262661
504	hsa-miR-497-5p	2.68251	0.571918
505	hsa-miR-498	19.8533	9.34535
506	hsa-miR-499a-3p	1.46798	0.00262661
507	hsa-miR-499a-5p	9.45244	0.266346
508	hsa-miR-499b-3p	1.30657	0.00384885
509	hsa-miR-499b-5p	2.41885	0.00411266
510	hsa-miR-500a-3p	23.1224	19.6636
511	hsa-miR-500a-5p	18.9452	9.71914
512	hsa-miR-500b-3p	24.2696	11.348
513	hsa-miR-500b-5p	25.2794	19.9157
514	hsa-miR-501-3p	16.0491	4.74642
515	hsa-miR-501-5p	12.0524	4.43048
516	hsa-miR-502-3p	24.16	11.0939
517	hsa-miR-502-5p	10.1104	0.391566
518	hsa-miR-503-3p	3.20674	0.700247
519	hsa-miR-503-5p	2.35	0.169813
520	hsa-miR-504-3p	7.0998	0.16708
521	hsa-miR-504-5p	0.0380718	0.00262661
522	hsa-miR-505-3p	19.1457	4.82462
523	hsa-miR-505-5p	0.822657	0.00262661
524	hsa-miR-506-3p	1.97577	0.00397142
525	hsa-miR-506-5p	0.0380718	0.21188
526	hsa-miR-507	0.235717	0.00262661
527	hsa-miR-508-3p	2.10758	0.00262661
528	hsa-miR-508-5p	0.0380718	0.00262661
529	hsa-miR-509-3-5p	4.61965	3.56697
530	hsa-miR-509-3p	4.10954	1.81653
531	hsa-miR-509-5p	1.44921	4.22313
532	hsa-miR-510-3p	1.34929	2.09588
533	hsa-miR-510-5p	2.83775	2.87034
534	hsa-miR-511-3p	0.0198909	5.4264
535	hsa-miR-511-5p	4.56344	3.56856
536	hsa-miR-512-3p	2.54037	5.21759
537	hsa-miR-512-5p	3.3843	0.230485
538	hsa-miR-513a-3p	0.0250053	0.677445
539	hsa-miR-513a-5p	3.20593	0.962073
540	hsa-miR-513b-3p	0.592455	1.61809
541	hsa-miR-513b-5p	0.392979	1.93562
542	hsa-miR-513c-3p	2.25437	0.897328
543	hsa-miR-513c-5p	3.15568	0.735665
544	hsa-miR-514a-3p	0.0268925	1.43836
545	hsa-miR-514a-5p	0.0213455	2.42568
546	hsa-miR-514b-3p	0.0208451	3.73947
547	hsa-miR-514b-5p	3.82438	4.14083
548	hsa-miR-515-3p	0.0220461	1.96565
549	hsa-miR-515-5p	2.35707	1.18506
550	hsa-miR-516a-3p	0.802903	1.40435
551	hsa-miR-516a-5p	0.313705	1.71407
552	hsa-miR-516b-5p	3.2621	5.2656
553	hsa-miR-517-5p	2.65892	13.5359
554	hsa-miR-517a-3p	0.134417	1.97928
555	hsa-miR-517c-3p	4.4067	0.913678
556	hsa-miR-518a-3p	0.674917	0.227202
557	hsa-miR-518a-5p	1.04138	2.50113
558	hsa-miR-518b	2.94772	1.23043
559	hsa-miR-518c-3p	3.72814	4.85335
560	hsa-miR-518c-5p	3.01558	2.18274
561	hsa-miR-518d-3p	0.446345	2.60646
562	hsa-miR-518d-5p	3.75644	1.06559
563	hsa-miR-518e-3p	2.31757	1.46581
564	hsa-miR-518e-5p	4.2754	0.740222
565	hsa-miR-518f-3p	3.57001	5.09414
566	hsa-miR-518f-5p	4.56854	1.46857
567	hsa-miR-519a-3p	2.57953	2.59973
568	hsa-miR-519b-3p	4.21022	0.754869
569	hsa-miR-519c-3p	8.73791	0.00454889
570	hsa-miR-519d-3p	12.1555	0.99152
571	hsa-miR-519d-5p	9.79368	0.345663
572	hsa-miR-519e-3p	1.01714	0.392316
573	hsa-miR-519e-5p	3.11615	0.00397647
574	hsa-miR-520a-3p	3.22352	0.00387043
575	hsa-miR-520a-5p	1.73938	0.00397263
576	hsa-miR-520b	0.827428	0.889606
577	hsa-miR-520c-3p	6.64921	0.195244
578	hsa-miR-520d-3p	4.33761	0.0700127
579	hsa-miR-520d-5p	3.9038	0.823364
580	hsa-miR-520e	7.69094	0.0044592
581	hsa-miR-520f-3p	4.30113	2.36563
582	hsa-miR-520f-5p	5.50548	0.186441
583	hsa-miR-520g-3p	4.93487	2.08284
584	hsa-miR-520g-5p	6.02235	2.1473
585	hsa-miR-520h	7.17718	1.59361
586	hsa-miR-521	9.80124	1.37535
587	hsa-miR-522-3p	14.1429	1.02067
588	hsa-miR-523-3p	8.06551	0.410296
589	hsa-miR-524-3p	6.10015	1.92744
590	hsa-miR-524-5p	11.3661	8.45069
591	hsa-miR-525-3p	2.56151	0.380271
592	hsa-miR-525-5p	1.76188	1.67016
593	hsa-miR-526b-3p	3.51941	0.318039
594	hsa-miR-526b-5p	0.0380718	0.00263323
595	hsa-miR-532-3p	23.3321	15.2886
596	hsa-miR-532-5p	12.6823	12.2116
597	hsa-miR-539-3p	2.32348	2.84088
598	hsa-miR-539-5p	5.55825	0.0975069
599	hsa-miR-541-3p	0.165504	0.395089
600	hsa-miR-541-5p	0.330896	0.461839
601	hsa-miR-542-3p	1.41252	0.00368248
602	hsa-miR-542-5p	0.124674	0.00262661
603	hsa-miR-543	0.0380718	0.00262661
604	hsa-miR-544a	0.0380718	0.00262661
605	hsa-miR-544b	0.0380718	0.00262661
606	hsa-miR-545-3p	1.88848	0.593462
607	hsa-miR-545-5p	0.0380718	0.00262661
608	hsa-miR-548a-3p	3.33317	0.905716
609	hsa-miR-548a-5p	3.94309	1.1251
610	hsa-miR-548b-3p	3.171	3.78616
611	hsa-miR-548b-5p	3.72091	4.98928
612	hsa-miR-548c-3p	4.05569	4.84515
613	hsa-miR-548d-3p	3.46439	3.75862
614	hsa-miR-548d-5p	3.45151	16.0319
615	hsa-miR-548e-3p	0.77074	4.15176
616	hsa-miR-548e-5p	0.92332	0.752218
617	hsa-miR-548f-3p	0.0215895	2.64871
618	hsa-miR-548f-5p	3.54051	1.82316
619	hsa-miR-548g-3p	0.890438	4.24379
620	hsa-miR-548h-3p	4.01238	6.87977
621	hsa-miR-548h-5p	0.921878	7.50348
622	hsa-miR-548i	1.17673	2.94604
623	hsa-miR-548j-3p	0.528231	4.28642
624	hsa-miR-548j-5p	3.33897	3.83068
625	hsa-miR-548k	2.20829	4.0864
626	hsa-miR-548l	0.838774	4.89688
627	hsa-miR-548m	2.33183	3.29265
628	hsa-miR-548n	1.50554	3.07
629	hsa-miR-548o-3p	0.023075	0.94758
630	hsa-miR-548p	1.83886	9.22584
631	hsa-miR-548q	15.6118	17.2169
632	hsa-miR-548s	4.84808	10.4181
633	hsa-miR-548t-5p	2.11208	9.60275
634	hsa-miR-548u	1.46516	11.0413
635	hsa-miR-548v	3.43097	7.29715
636	hsa-miR-548w	7.47144	13.6735
637	hsa-miR-548x-3p	1.54406	14.3204
638	hsa-miR-548y	4.69262	12.5447
639	hsa-miR-548aa	8.16174	2.33589
640	hsa-miR-548ba	2.83219	6.70706
641	hsa-miR-548ab	5.36611	0.0749477
642	hsa-miR-548ac	1.67164	0.23222
643	hsa-miR-548ad	1.59096	1.31213
644	hsa-miR-548ae	0.0770839	0.00262661
645	hsa-miR-548ag	2.70657	2.23618
646	hsa-miR-548ah-3p	2.00156	3.0069
647	hsa-miR-548ah-5p	4.17529	4.66848
648	hsa-miR-548ai	4.07577	3.2786
649	hsa-miR-548aj-3p	3.23799	0.155495
650	hsa-miR-548aj-5p	1.45069	4.50026
651	hsa-miR-548ak	1.69361	1.47924
652	hsa-miR-548al	0.151962	0.939756
653	hsa-miR-548am-3p	2.0794	4.01537
654	hsa-miR-548am-5p	3.65578	0.0718295
655	hsa-miR-548an	0.0380718	0.00262661
656	hsa-miR-548ao-3p	0.795051	0.00262661
657	hsa-miR-548ao-5p	2.6019	0.612019
658	hsa-miR-548ap-3p	1.56267	2.06529
659	hsa-miR-548ap-5p	0.30329	0.418732
660	hsa-miR-548aq-3p	1.53189	2.75215
661	hsa-miR-548aq-5p	2.52606	0.294655
662	hsa-miR-548ar-3p	0.0380718	0.135178
663	hsa-miR-548ar-5p	1.83704	0.512804
664	hsa-miR-548as-3p	0.763325	0.00262661
665	hsa-miR-548as-5p	4.77474	0.50976
666	hsa-miR-548at-3p	0.0380718	0.138861
667	hsa-miR-548at-5p	0.0260999	0.33863
668	hsa-miR-548au-3p	0.0320521	0.30553
669	hsa-miR-548au-5p	8.55007	3.51734
670	hsa-miR-548av-3p	0.548595	1.20954
671	hsa-miR-548av-5p	1.63328	2.2072
672	hsa-miR-548aw	1.74629	1.53387
673	hsa-miR-548ax	3.78062	2.13242
674	hsa-miR-548ay-3p	7.80657	0.0910078
675	hsa-miR-548ay-5p	3.91037	1.44986
676	hsa-miR-548az-3p	2.71043	3.7949
677	hsa-miR-548az-5p	4.81379	1.25739
678	hsa-miR-549a	3.77551	10.7614
679	hsa-miR-550a-3-5p	5.47684	11.0306
680	hsa-miR-550a-3p	4.61297	13.9855
681	hsa-miR-550a-5p	2.18903	16.406
682	hsa-miR-550b-2-5p	0.706604	5.36875
683	hsa-miR-550b-3p	3.9311	12.1411
684	hsa-miR-551a	3.46775	7.17183
685	hsa-miR-551b-3p	32.1645	32.4357
686	hsa-miR-551b-5p	1.29823	1.45169
687	hsa-miR-552-3p	0.0380718	0.00262661
688	hsa-miR-552-5p	0.0380718	0.00262661
689	hsa-miR-553	0.0380718	0.0137897
690	hsa-miR-554	0.0380718	0.366961
691	hsa-miR-555	0.826778	0.209271
692	hsa-miR-556-3p	0.0380718	0.00262661
693	hsa-miR-556-5p	0.426076	0.00262661
694	hsa-miR-557	1.05828	3.26344
695	hsa-miR-558	2.01077	0.232659
696	hsa-miR-559	0.810794	0.00262661
697	hsa-miR-561-3p	0.426076	0.0050937
698	hsa-miR-561-5p	1.79444	0.124326
699	hsa-miR-562	0.552982	0.00262661
700	hsa-miR-563	4.52433	3.0027
701	hsa-miR-564	9.92298	14.959
702	hsa-miR-566	3.31308	0.00388341
703	hsa-miR-567	0.892855	0.32977
704	hsa-miR-568	10.1755	4.60035
705	hsa-miR-569	0.0612207	0.00262661
706	hsa-miR-570-3p	1.92805	1.32371
707	hsa-miR-571	1.04474	0.00262661
708	hsa-miR-572	21.663	17.4167
709	hsa-miR-573	1.83545	0.0037268
710	hsa-miR-574-3p	238.645	193.84
711	hsa-miR-574-5p	49.0206	45.9094
712	hsa-miR-575	9.992	0.00444463
713	hsa-miR-576-3p	1.17558	0.00262661
714	hsa-miR-576-5p	6.88418	0.0668525
715	hsa-miR-577	0.584708	0.00262661
716	hsa-miR-578	0.0380718	0.00262661
717	hsa-miR-579-3p	0.0380718	0.00262661
718	hsa-miR-579-5p	0.0380718	0.0400559
719	hsa-miR-580-3p	1.83678	0.00262661
720	hsa-miR-580-5p	3.07351	0.00349968
721	hsa-miR-581	0.0380718	0.00262661
722	hsa-miR-582-3p	4.8314	0.00262661
723	hsa-miR-582-5p	3.47504	0.00262661
724	hsa-miR-583	2.16848	0.585028
725	hsa-miR-584-3p	0.0380718	0.00262661
726	hsa-miR-584-5p	2.9036	1.70667
727	hsa-miR-585-3p	1.14108	0.257267
728	hsa-miR-585-5p	3.06078	5.40259
729	hsa-miR-586	2.63768	3.48206
730	hsa-miR-587	3.96205	2.7391
731	hsa-miR-588	0.90257	0.0301926
732	hsa-miR-589-3p	3.04182	3.18037
733	hsa-miR-589-5p	2.37762	0.64125
734	hsa-miR-590-3p	5.94879	4.22163
735	hsa-miR-590-5p	4.58791	8.36014
736	hsa-miR-591	2.83712	2.71934
737	hsa-miR-592	1.33781	1.60995
738	hsa-miR-593-3p	2.22209	0.719744
739	hsa-miR-593-5p	2.62212	3.33977
740	hsa-miR-595	3.96552	9.40045
741	hsa-miR-596	2.90755	4.95926
742	hsa-miR-597-3p	0.116063	2.19183
743	hsa-miR-597-5p	0.0305856	0.147894
744	hsa-miR-598-3p	10.9352	4.85076
745	hsa-miR-598-5p	1.60373	0.914437
746	hsa-miR-599	1.95384	0.138554
747	hsa-miR-600	0.0219187	1.6903
748	hsa-miR-601	2.06928	3.72162
749	hsa-miR-602	2.45587	3.35373
750	hsa-miR-603	4.31851	0.0222182
751	hsa-miR-604	0.781829	0.199391
752	hsa-miR-605-3p	2.64597	2.51259
753	hsa-miR-605-5p	0.445046	4.29163
754	hsa-miR-606	0.657155	1.4103
755	hsa-miR-607	0.56745	3.33516
756	hsa-miR-608	4.05792	1.56337
757	hsa-miR-609	5.10847	3.26771
758	hsa-miR-610	11.598	0.882786
759	hsa-miR-611	4.29116	7.39049
760	hsa-miR-612	24.861	14.3378
761	hsa-miR-613	3.70188	2.07835
762	hsa-miR-614	2.83113	0.00377824
763	hsa-miR-615-3p	17.427	13.1047
764	hsa-miR-615-5p	91.041	111.195
765	hsa-miR-616-3p	5.236	4.21459
766	hsa-miR-616-5p	6.27918	1.42598
767	hsa-miR-617	44.9725	8.09798
768	hsa-miR-618	3.43766	0.710956
769	hsa-miR-619-3p	3.81244	0.00369228
770	hsa-miR-619-5p	9.64552	10.3235
771	hsa-miR-620	2.45592	4.46589
772	hsa-miR-621	4.03188	0.947091
773	hsa-miR-622	1.71283	4.06208
774	hsa-miR-623	16.7595	16.0914
775	hsa-miR-624-3p	4.26691	0.885133
776	hsa-miR-624-5p	3.89571	0.714438
777	hsa-miR-625-3p	15.9977	19.0879
778	hsa-miR-625-5p	29.863	29.5678
779	hsa-miR-626	3.29376	1.42764
780	hsa-miR-627-3p	1.10585	1.61677
781	hsa-miR-627-5p	3.59508	2.47992
782	hsa-miR-628-3p	5.40855	0.293568
783	hsa-miR-628-5p	7.25505	2.81188
784	hsa-miR-629-3p	9.23238	4.21176
785	hsa-miR-629-5p	16.6924	8.45809
786	hsa-miR-630	3.76383	0.847071
787	hsa-miR-631	3.92006	0.382525
788	hsa-miR-632	0.541239	0.39373
789	hsa-miR-633	1.92047	0.0040123
790	hsa-miR-634	1.95519	1.88836
791	hsa-miR-635	0.400505	0.00262661
792	hsa-miR-636	3.69739	0.705913
793	hsa-miR-637	9.17697	0.0918826
794	hsa-miR-638	1415.38	1519.92
795	hsa-miR-639	3.17302	1.46003
796	hsa-miR-640	2.58701	1.64394
797	hsa-miR-641	3.61579	7.51845
798	hsa-miR-642a-3p	4.03731	1.25688
799	hsa-miR-642a-5p	5.36306	6.71927
800	hsa-miR-642b-3p	5.06483	3.33534
801	hsa-miR-642b-5p	6.1308	5.92448
802	hsa-miR-643	2.92684	4.6033
803	hsa-miR-644a	2.35788	1.3551
804	hsa-miR-645	2.45206	1.87095
805	hsa-miR-646	1.571	1.68965
806	hsa-miR-647	3.46765	1.65497
807	hsa-miR-648	3.09521	1.7861
808	hsa-miR-649	4.60991	0.849644
809	hsa-miR-650	1.61175	0.623179
810	hsa-miR-651-3p	2.30031	4.32639
811	hsa-miR-651-5p	2.42156	8.94439
812	hsa-miR-652-3p	42.9845	55.3452
813	hsa-miR-652-5p	8.14869	12.5557
814	hsa-miR-653-3p	2.63251	2.02212
815	hsa-miR-653-5p	0.0224077	1.96911
816	hsa-miR-654-3p	9.48719	8.8087
817	hsa-miR-654-5p	3.28533	9.25606
818	hsa-miR-655-3p	5.02442	9.1223
819	hsa-miR-655-5p	3.01827	4.94752
820	hsa-miR-656-3p	6.28925	11.4874
821	hsa-miR-656-5p	2.4268	8.43704
822	hsa-miR-657	5.25783	10.9861
823	hsa-miR-658	8.77459	12.2519
824	hsa-miR-659-3p	4.37398	8.43063
825	hsa-miR-659-5p	3.90291	11.0719
826	hsa-miR-660-3p	6.91389	13.159
827	hsa-miR-660-5p	31.6514	48.9774
828	hsa-miR-661	2.99754	11.3202
829	hsa-miR-662	4.51634	12.917
830	hsa-miR-663a	119.653	172.931
831	hsa-miR-663b	2.07123	12.7843
832	hsa-miR-664a-3p	25.8907	35.0165
833	hsa-miR-664a-5p	4.21739	0.653175
834	hsa-miR-664b-3p	9.60207	11.1309
835	hsa-miR-664b-5p	0.0380718	0.104075
836	hsa-miR-665	0.0380718	0.00262661
837	hsa-miR-668-3p	10.8941	7.16285
838	hsa-miR-668-5p	0.0380718	0.750607
839	hsa-miR-670-3p	0.0258016	0.534795
840	hsa-miR-670-5p	3.60684	0.769508
841	hsa-miR-671-3p	5.34839	5.46574
842	hsa-miR-671-5p	12.2579	15.4212
843	hsa-miR-675-3p	5.79857	3.57353
844	hsa-miR-675-5p	0.0380718	0.174753
845	hsa-miR-676-3p	0.853658	0.00262661
846	hsa-miR-676-5p	0.0380718	0.00262661
847	hsa-miR-708-3p	3.40428	0.00421218
848	hsa-miR-708-5p	5.67904	0.0686491
849	hsa-miR-711	2.111	0.00262661
850	hsa-miR-718	3.32319	22.4588
851	hsa-miR-744-3p	3.36642	4.15349
852	hsa-miR-744-5p	27.943	40.0822
853	hsa-miR-758-3p	1.15397	4.35609
854	hsa-miR-758-5p	0.607451	3.83797
855	hsa-miR-759	3.53467	4.16747
856	hsa-miR-760	0.0652217	4.39736
857	hsa-miR-761	0.0380718	0.821008
858	hsa-miR-762	363.943	422.285
859	hsa-miR-764	0.204333	2.99677
860	hsa-miR-765	14.64	16.1177
861	hsa-miR-766-3p	11.3851	15.4702
862	hsa-miR-766-5p	2.25747	3.46596
863	hsa-miR-767-3p	4.18241	5.23419
864	hsa-miR-767-5p	0.648484	0.105947
865	hsa-miR-769-3p	3.17771	0.817228
866	hsa-miR-769-5p	3.6433	3.72307
867	hsa-miR-770-5p	4.46609	3.11524
868	hsa-miR-802	0.431744	1.45133
869	hsa-miR-873-3p	2.49748	0.974705
870	hsa-miR-873-5p	3.90946	0.128211
871	hsa-miR-874-3p	4.12595	0.312116
872	hsa-miR-874-5p	1.6517	1.8512
873	hsa-miR-875-3p	1.2132	2.10017
874	hsa-miR-875-5p	0.0222453	1.37728
875	hsa-miR-876-3p	6.43227	2.22558
876	hsa-miR-876-5p	2.64237	1.30029
877	hsa-miR-877-3p	5.48988	1.32719
878	hsa-miR-877-5p	4.82575	9.2889
879	hsa-miR-885-3p	3.65749	3.76388
880	hsa-miR-885-5p	15.4054	13.2431
881	hsa-miR-887-3p	2.61933	0.0687656
882	hsa-miR-887-5p	0.0380718	0.0183914
883	hsa-miR-888-3p	1.52799	0.0562258
884	hsa-miR-888-5p	0.0380718	0.00262661
885	hsa-miR-889-3p	2.6961	2.28773
886	hsa-miR-889-5p	0.0970679	0.0947965
887	hsa-miR-890	0.347138	0.166837
888	hsa-miR-891a-3p	0.0230978	0.906274
889	hsa-miR-891a-5p	3.93395	6.26357
890	hsa-miR-891b	2.2472	2.0979
891	hsa-miR-892a	2.28392	0.708046
892	hsa-miR-892b	2.54313	0.349148
893	hsa-miR-892c-3p	0.0380718	0.415912
894	hsa-miR-892c-5p	1.44797	2.8328
895	hsa-miR-920	1.54607	2.07938
896	hsa-miR-921	1.37752	7.53773
897	hsa-miR-922	2.55274	5.65666
898	hsa-miR-924	3.35212	5.0053
899	hsa-miR-933	4.44521	2.70885
900	hsa-miR-934	2.14568	5.72807
901	hsa-miR-935	0.0203909	3.74322
902	hsa-miR-936	5.35945	9.72759
903	hsa-miR-937-3p	2.74422	5.83122
904	hsa-miR-937-5p	46.0169	53.7369
905	hsa-miR-938	0.545942	4.57844
906	hsa-miR-939-3p	2.34871	3.74095
907	hsa-miR-939-5p	10.9138	11.9041
908	hsa-miR-940	25.8435	28.8654
909	hsa-miR-941	2.65214	10.0531
910	hsa-miR-942-3p	0.0212159	2.85364
911	hsa-miR-942-5p	3.10234	7.12419
912	hsa-miR-943	2.30599	7.93635
913	hsa-miR-944	2.11444	6.64448
914	hsa-miR-1178-3p	1.03364	0.00262661
915	hsa-miR-1178-5p	4.92758	0.0164143
916	hsa-miR-1179	0.277694	0.115179
917	hsa-miR-1180-3p	1.89065	3.01835
918	hsa-miR-1180-5p	0.0380718	0.337145
919	hsa-miR-1181	1.74474	0.574792
920	hsa-miR-1182	1.53066	2.49771
921	hsa-miR-1183	4.01633	4.36467
922	hsa-miR-1184	0.892906	0.305561
923	hsa-miR-1185-1-3p	2.54354	5.16843
924	hsa-miR-1185-2-3p	16.5549	11.3607
925	hsa-miR-1185-5p	2.6835	1.86485
926	hsa-miR-1193	0.18247	0.473154
927	hsa-miR-1197	3.0211	0.00401277
928	hsa-miR-1199-3p	1.41321	0.790134
929	hsa-miR-1199-5p	1.49553	0.108689
930	hsa-miR-1200	5.00078	0.745487
931	hsa-miR-1202	0.0380718	0.241528
932	hsa-miR-1203	4.20186	1.60665
933	hsa-miR-1204	2.72014	0.00262661
934	hsa-miR-1205	0.943156	0.00346537
935	hsa-miR-1206	3.62631	0.137119
936	hsa-miR-1207-3p	0.0380718	0.00262661
937	hsa-miR-1207-5p	10.6579	0.00452577
938	hsa-miR-1208	0.0380718	0.00262661
939	hsa-miR-1224-3p	1.05487	0.610844
940	hsa-miR-1224-5p	23.2731	0.750987
941	hsa-miR-1225-3p	2.9724	0.333781
942	hsa-miR-1225-5p	0.0380718	0.00262661
943	hsa-miR-1226-3p	4.06365	0.0043004
944	hsa-miR-1226-5p	0.0380718	0.00262661
945	hsa-miR-1227-3p	0.130637	0.643336
946	hsa-miR-1227-5p	190.107	154.193
947	hsa-miR-1228-3p	6.07119	0.749141
948	hsa-miR-1228-5p	47.2921	26.5552
949	hsa-miR-1229-3p	3.81005	4.3939
950	hsa-miR-1229-5p	16.9354	16.8722
951	hsa-miR-1231	8.65286	0.476943
952	hsa-miR-1233-3p	5.58121	3.75608
953	hsa-miR-1233-5p	67.5808	49.0017
954	hsa-miR-1234-3p	5.31744	3.50138
955	hsa-miR-1236-3p	4.46846	1.32295
956	hsa-miR-1236-5p	3.75572	0.00413442
957	hsa-miR-1237-3p	3.83469	2.76042
958	hsa-miR-1237-5p	38.6919	35.6038
959	hsa-miR-1238-3p	6.70311	0.348442
960	hsa-miR-1238-5p	7.70183	1.41846
961	hsa-miR-1243	0.731598	0.00262661
962	hsa-miR-1244	4.36297	6.48
963	hsa-miR-1245a	1.92818	0.00262661
964	hsa-miR-1245b-3p	1.83362	0.00262661
965	hsa-miR-1245b-5p	0.139277	0.802459
966	hsa-miR-1246	45.0039	19.5856
967	hsa-miR-1247-3p	0.0380718	0.00262661
968	hsa-miR-1247-5p	3.89347	0.888695
969	hsa-miR-1248	0.0380718	0.00262661
970	hsa-miR-1249	8.37445	3.99282
971	hsa-miR-1250-3p	0.602608	0.00262661
972	hsa-miR-1250-5p	2.36551	0.00262661
973	hsa-miR-1251-3p	2.70189	0.908812
974	hsa-miR-1251-5p	3.19229	0.00262661
975	hsa-miR-1252-3p	2.91634	0.865698
976	hsa-miR-1252-5p	1.54663	1.2941
977	hsa-miR-1253	1.83431	2.78401
978	hsa-miR-1254	2.95825	2.51364
979	hsa-miR-1255a	2.82922	1.79077
980	hsa-miR-1255b-2-3p	2.32281	2.71896
981	hsa-miR-1255b-5p	2.96075	2.91776
982	hsa-miR-1256	2.37339	3.86388
983	hsa-miR-1257	2.64547	5.21945
984	hsa-miR-1258	2.50534	1.80792
985	hsa-miR-1260a	7.39138	10.8175
986	hsa-miR-1260b	86.3011	102.579
987	hsa-miR-1261	0.437548	1.68774
988	hsa-miR-1262	1.05471	1.09275
989	hsa-miR-1263	0.853877	1.07873
990	hsa-miR-1264	0.276984	0.492391
991	hsa-miR-1265	2.0605	5.05782
992	hsa-miR-1266-3p	0.405843	1.08485
993	hsa-miR-1266-5p	0.0221671	1.42588
994	hsa-miR-1267	1.00526	2.42287
995	hsa-miR-1268a	17.9205	21.4638
996	hsa-miR-1268b	21.2627	19.9333
997	hsa-miR-1269a	1.96481	3.27035
998	hsa-miR-1269b	1.28689	2.48739
999	hsa-miR-1270	0.911271	12.4732
1000	hsa-miR-1271-3p	1.87267	3.06387
1001	hsa-miR-1271-5p	5.22107	6.19999
1002	hsa-miR-1272	1.83793	6.1329
1003	hsa-miR-1273a	1.59528	4.64445
1004	hsa-miR-1273c	7.57374	7.24728
1005	hsa-miR-1273d	2.41908	2.11314
1006	hsa-miR-1273e	3.05955	8.09676
1007	hsa-miR-1273f	11.4775	9.21654
1008	hsa-miR-1273g-3p	887.645	1250.97
1009	hsa-miR-1273g-5p	0.0236989	1.02094
1010	hsa-miR-1273h-3p	5.93863	0.382553
1011	hsa-miR-1273h-5p	0.0380718	0.680331
1012	hsa-miR-1275	171.348	259.026
1013	hsa-miR-1276	0.578741	2.28785
1014	hsa-miR-1277-3p	2.95374	0.818435
1015	hsa-miR-1277-5p	2.20768	1.3847
1016	hsa-miR-1278	3.18627	1.81539
1017	hsa-miR-1279	2.44275	1.98083
1018	hsa-miR-1281	20.5392	24.0422
1019	hsa-miR-1282	3.40878	1.54423
1020	hsa-miR-1283	2.19994	0.813119
1021	hsa-miR-1284	4.50717	1.26288
1022	hsa-miR-1285-3p	5.63858	2.93068
1023	hsa-miR-1285-5p	7.02421	2.46828
1024	hsa-miR-1286	6.68943	0.534094
1025	hsa-miR-1287-3p	0.792649	0.160381
1026	hsa-miR-1287-5p	3.66316	0.375881
1027	hsa-miR-1288-3p	5.26849	0.234679
1028	hsa-miR-1288-5p	3.30145	1.87919
1029	hsa-miR-1289	5.38823	0.30554
1030	hsa-miR-1290	2.44483	0.00262661
1031	hsa-miR-1291	1.01083	0.00376691
1032	hsa-miR-1292-3p	5.13345	2.05857
1033	hsa-miR-1292-5p	2.27033	0.00262661
1034	hsa-miR-1293	4.6181	0.479757
1035	hsa-miR-1294	0.0380718	0.269885
1036	hsa-miR-1295a	0.921957	0.00262661
1037	hsa-miR-1295b-3p	3.65074	0.424158
1038	hsa-miR-1295b-5p	1.02855	1.39314
1039	hsa-miR-1296-3p	3.74562	0.182981
1040	hsa-miR-1296-5p	3.97357	0.283773
1041	hsa-miR-1297	6.07752	0.00262661
1042	hsa-miR-1298-3p	0.451559	1.47281
1043	hsa-miR-1298-5p	4.01497	0.422255
1044	hsa-miR-1299	4.21861	0.858101
1045	hsa-miR-1301-3p	11.0568	9.33228
1046	hsa-miR-1301-5p	1.67449	8.06033
1047	hsa-miR-1302	4.2919	1.44397
1048	hsa-miR-1303	2.30849	2.09302
1049	hsa-miR-1304-3p	0.235717	0.00262661
1050	hsa-miR-1304-5p	1.98647	2.62456
1051	hsa-miR-1305	0.0380718	0.00262661
1052	hsa-miR-1306-3p	2.10471	0.0040698
1053	hsa-miR-1306-5p	11.826	2.26076
1054	hsa-miR-1307-3p	107.357	232.474
1055	hsa-miR-1307-5p	2.46897	0.00394874
1056	hsa-miR-1321	0.0380718	0.437293
1057	hsa-miR-1322	0.0380718	0.00262661
1058	hsa-miR-1323	0.0380718	0.00262661
1059	hsa-miR-1324	0.0380718	0.00262661
1060	hsa-miR-1343-3p	0.0380718	0.0682254
1061	hsa-miR-1343-5p	7.59921	1.59097
1062	hsa-miR-1468-3p	2.207	0.730582
1063	hsa-miR-1468-5p	0.419876	0.548389
1064	hsa-miR-1469	698.677	723.734
1065	hsa-miR-1470	7.763	8.38566
1066	hsa-miR-1471	1.72697	1.35274
1067	hsa-miR-1537-3p	0.564348	1.82938
1068	hsa-miR-1537-5p	0.0380718	0.217263
1069	hsa-miR-1538	3.43347	3.18161
1070	hsa-miR-1539	0.0306021	0.0827099
1071	hsa-miR-1587	12.4541	19.4006
1072	hsa-miR-1825	4.96218	6.6645
1073	hsa-miR-1827	2.8916	0.691325
1074	hsa-miR-1908-3p	2.63337	0.404473
1075	hsa-miR-1908-5p	21.1432	12.4555
1076	hsa-miR-1909-3p	0.0380718	0.00262661
1077	hsa-miR-1909-5p	3.03096	0.00383869
1078	hsa-miR-1910-3p	14.505	0.300582
1079	hsa-miR-1910-5p	0.0380718	0.00262661
1080	hsa-miR-1911-3p	1.11466	0.00369552
1081	hsa-miR-1911-5p	0.206215	0.206763
1082	hsa-miR-1912	0.0380718	0.00262661
1083	hsa-miR-1913	4.21601	4.00655
1084	hsa-miR-1914-3p	1.52476	0.215421
1085	hsa-miR-1914-5p	9.75356	1.34014
1086	hsa-miR-1915-3p	313.408	318.377
1087	hsa-miR-1915-5p	2.13454	0.00332098
1088	hsa-miR-1972	0.0380718	0.00262661
1089	hsa-miR-1973	169.855	173.095
1090	hsa-miR-1976	3.1934	2.47013
1091	hsa-miR-2052	1.95808	1.75177
1092	hsa-miR-2053	1.18298	0.00262661
1093	hsa-miR-2054	0.0380718	0.00262661
1094	hsa-miR-2110	2.4602	1.60485
1095	hsa-miR-2113	1.22603	0.595482
1096	hsa-miR-2114-3p	6.47384	0.663064
1097	hsa-miR-2114-5p	5.44344	2.50213
1098	hsa-miR-2115-3p	0.961867	1.16545
1099	hsa-miR-2115-5p	3.27835	2.05786
1100	hsa-miR-2116-3p	5.50457	4.50551
1101	hsa-miR-2116-5p	4.94685	8.1252
1102	hsa-miR-2117	0.0228373	1.1485
1103	hsa-miR-2276-3p	0.0243879	0.477399
1104	hsa-miR-2276-5p	3.87522	0.00262661
1105	hsa-miR-2277-3p	0.0380718	0.841284
1106	hsa-miR-2277-5p	0.820302	1.35116
1107	hsa-miR-2278	2.46836	4.25386
1108	hsa-miR-2355-3p	2.7262	0.871513
1109	hsa-miR-2355-5p	3.48273	1.34527
1110	hsa-miR-2392	9.54751	5.39921
1111	hsa-miR-2467-3p	8.55432	9.00426
1112	hsa-miR-2467-5p	3.14119	0.420149
1113	hsa-miR-2681-3p	2.8119	0.00403444
1114	hsa-miR-2681-5p	2.92425	0.741354
1115	hsa-miR-2682-3p	1.04049	0.00262661
1116	hsa-miR-2682-5p	1.31949	0.0038575
1117	hsa-miR-2861	221.657	208.02
1118	hsa-miR-2909	1.22349	1.31057
1119	hsa-miR-3064-3p	4.49059	1.67304
1120	hsa-miR-3064-5p	2.08837	0.302978
1121	hsa-miR-3065-3p	1.58511	0.264527
1122	hsa-miR-3065-5p	0.469993	0.00262661
1123	hsa-miR-3074-3p	1.4096	0.00262661
1124	hsa-miR-3074-5p	4.44389	0.00262661
1125	hsa-miR-3115	1.42546	0.878859
1126	hsa-miR-3116	0.0237954	2.1062
1127	hsa-miR-3117-3p	5.61932	0.968409
1128	hsa-miR-3117-5p	0.0220273	1.87984
1129	hsa-miR-3118	0.0380718	0.00262661
1130	hsa-miR-3119	0.668145	0.00262661
1131	hsa-miR-3120-3p	0.0380718	0.00262661
1132	hsa-miR-3120-5p	0.0380718	0.00262661
1133	hsa-miR-3121-3p	2.77188	0.547896
1134	hsa-miR-3121-5p	0.484451	0.00262661
1135	hsa-miR-3122	0.0380718	0.00262661
1136	hsa-miR-3123	0.0380718	0.267557
1137	hsa-miR-3124-3p	4.39805	0.215658
1138	hsa-miR-3124-5p	2.67094	0.688263
1139	hsa-miR-3125	3.80852	3.65491
1140	hsa-miR-3126-3p	7.12474	3.6345
1141	hsa-miR-3126-5p	20.2797	0.00416433
1142	hsa-miR-3127-3p	0.47935	1.02513
1143	hsa-miR-3127-5p	2.27025	0.935484
1144	hsa-miR-3128	3.74613	0.52199
1145	hsa-miR-3129-3p	3.25386	0.875252
1146	hsa-miR-3129-5p	2.82647	0.820264
1147	hsa-miR-3130-3p	3.71558	0.581497
1148	hsa-miR-3130-5p	2.0949	1.47501
1149	hsa-miR-3131	1.49336	0.660087
1150	hsa-miR-3132	2.47277	0.755314
1151	hsa-miR-3133	1.82235	3.33847
1152	hsa-miR-3134	3.61246	2.18378
1153	hsa-miR-3135a	1.82999	0.291732
1154	hsa-miR-3135b	7.2512	7.4023
1155	hsa-miR-3136-3p	0.025794	1.35309
1156	hsa-miR-3136-5p	1.35361	1.2282
1157	hsa-miR-3137	0.162722	2.51385
1158	hsa-miR-3138	0.0209287	4.07756
1159	hsa-miR-3139	0.483065	1.79625
1160	hsa-miR-3140-3p	0.0261337	1.09255
1161	hsa-miR-3140-5p	8.55611	1.38556
1162	hsa-miR-3141	79.0493	90.3066
1163	hsa-miR-3142	0.0236847	0.983175
1164	hsa-miR-3143	0.0230527	1.04398
1165	hsa-miR-3144-3p	0.0246973	0.891613
1166	hsa-miR-3144-5p	0.0252783	0.417248
1167	hsa-miR-3145-3p	3.19466	6.51257
1168	hsa-miR-3145-5p	3.07318	1.13941
1169	hsa-miR-3146	1.11152	3.21679
1170	hsa-miR-3147	3.43268	7.06528
1171	hsa-miR-3148	0.938344	16.3455
1172	hsa-miR-3149	29.1283	41.0427
1173	hsa-miR-3150a-3p	1.26371	2.7954
1174	hsa-miR-3150a-5p	2.11401	7.05947
1175	hsa-miR-3150b-3p	4.23857	14.6192
1176	hsa-miR-3150b-5p	1.98669	6.21935
1177	hsa-miR-3151-3p	2.561	7.04008
1178	hsa-miR-3151-5p	1.22655	6.47708
1179	hsa-miR-3152-3p	0.359999	4.74914
1180	hsa-miR-3152-5p	1.52593	5.44643
1181	hsa-miR-3153	0.0202161	4.84627
1182	hsa-miR-3154	0.367701	1.29681
1183	hsa-miR-3155a	0.0286479	0.776224
1184	hsa-miR-3155b	0.0380718	0.00262661
1185	hsa-miR-3156-3p	2.73109	4.08716
1186	hsa-miR-3156-5p	0.383447	0.699532
1187	hsa-miR-3157-3p	0.930716	0.200218
1188	hsa-miR-3157-5p	0.0380718	0.226108
1189	hsa-miR-3158-3p	0.0380718	0.066322
1190	hsa-miR-3158-5p	4.25382	0.00406071
1191	hsa-miR-3159	3.05702	0.360882
1192	hsa-miR-3160-3p	1.85609	0.215256
1193	hsa-miR-3160-5p	4.23325	0.0596491
1194	hsa-miR-3161	2.42572	1.87038
1195	hsa-miR-3162-3p	10.3759	19.6015
1196	hsa-miR-3162-5p	25.636	26.563
1197	hsa-miR-3163	4.37169	6.96701
1198	hsa-miR-3164	3.45442	2.18576
1199	hsa-miR-3165	2.9393	1.27151
1200	hsa-miR-3166	3.87932	1.82238
1201	hsa-miR-3167	4.70181	4.82115
1202	hsa-miR-3168	2.00756	0.189992
1203	hsa-miR-3169	4.28241	0.506242
1204	hsa-miR-3170	5.79731	0.0670848
1205	hsa-miR-3171	3.02305	0.698721
1206	hsa-miR-3173-3p	4.65779	1.15235
1207	hsa-miR-3173-5p	2.86265	0.136178
1208	hsa-miR-3174	9.66374	4.57189
1209	hsa-miR-3175	6.16279	0.493331
1210	hsa-miR-3176	2.57362	0.00352257
1211	hsa-miR-3177-3p	0.203968	0.0876459
1212	hsa-miR-3177-5p	2.65105	1.35555
1213	hsa-miR-3178	652.981	759.072
1214	hsa-miR-3179	0.0584591	0.159348
1215	hsa-miR-3180-3p	0.0380718	0.00262661
1216	hsa-miR-3180-5p	2.62341	0.899393
1217	hsa-miR-3180	1.04525	0.00262661
1218	hsa-miR-3181	21.8775	0.00472026
1219	hsa-miR-3182	0.604692	0.00262661
1220	hsa-miR-3183	4.28607	0.00417271
1221	hsa-miR-3184-3p	4.33614	1.02306
1222	hsa-miR-3184-5p	0.0866281	0.225895
1223	hsa-miR-3185	172.633	133.15
1224	hsa-miR-3186-3p	0.747786	0.0477168
1225	hsa-miR-3186-5p	3.67265	0.00382848
1226	hsa-miR-3187-3p	2.21646	0.902752
1227	hsa-miR-3187-5p	4.32281	0.495545
1228	hsa-miR-3188	1.11342	1.03681
1229	hsa-miR-3189-3p	3.47516	1.74897
1230	hsa-miR-3189-5p	0.0380718	0.00262661
1231	hsa-miR-3190-3p	3.42799	0.074532
1232	hsa-miR-3190-5p	1.66936	2.67931
1233	hsa-miR-3191-3p	0.700958	0.00262661
1234	hsa-miR-3191-5p	0.0380718	0.00262661
1235	hsa-miR-3192-3p	2.54668	0.00348771
1236	hsa-miR-3192-5p	8.81147	4.40045
1237	hsa-miR-3193	3.82141	0.00424301
1238	hsa-miR-3194-3p	2.40303	0.00402765
1239	hsa-miR-3194-5p	3.2399	0.00409819
1240	hsa-miR-3195	320.784	388.046
1241	hsa-miR-3196	640.762	623.335
1242	hsa-miR-3197	207.444	545.501
1243	hsa-miR-3198	0.381231	0.00262661
1244	hsa-miR-3199	0.0380718	0.00262661
1245	hsa-miR-3200-3p	0.0380718	0.00262661
1246	hsa-miR-3200-5p	0.743872	0.00262661
1247	hsa-miR-3201	0.0380718	0.00262661
1248	hsa-miR-3202	3.33449	0.00406186
1249	hsa-miR-3529-3p	2.84101	2.44676
1250	hsa-miR-3529-5p	3.18165	3.88042
1251	hsa-miR-3591-3p	16.2979	12.7029
1252	hsa-miR-3591-5p	2.80397	2.3602
1253	hsa-miR-3605-3p	0.759231	2.09628
1254	hsa-miR-3605-5p	1.0321	1.78789
1255	hsa-miR-3606-3p	0.217998	0.354504
1256	hsa-miR-3606-5p	2.30556	0.58039
1257	hsa-miR-3607-3p	21.9669	27.6246
1258	hsa-miR-3607-5p	43.465	85.1348
1259	hsa-miR-3609	49.176	46.998
1260	hsa-miR-3610	7.85284	4.77948
1261	hsa-miR-3611	5.18489	1.07792
1262	hsa-miR-3612	1.09427	3.87144
1263	hsa-miR-3613-3p	27.2724	29.182
1264	hsa-miR-3613-5p	49.025	57.5903
1265	hsa-miR-3614-3p	1.45591	1.63425
1266	hsa-miR-3614-5p	9.88975	3.19761
1267	hsa-miR-3615	4.66196	7.25002
1268	hsa-miR-3616-3p	1.89555	7.74664
1269	hsa-miR-3616-5p	3.47031	7.76947
1270	hsa-miR-3617-3p	0.671275	3.04248
1271	hsa-miR-3617-5p	2.61631	6.88927
1272	hsa-miR-3618	1.34351	5.08816
1273	hsa-miR-3619-3p	1.22816	1.2849
1274	hsa-miR-3619-5p	1.96255	0.422999
1275	hsa-miR-3620-3p	2.05236	3.99151
1276	hsa-miR-3620-5p	19.1412	19.2074
1277	hsa-miR-3621	91.3226	76.1123
1278	hsa-miR-3622a-3p	4.43107	2.13857
1279	hsa-miR-3622a-5p	1.16544	2.25782
1280	hsa-miR-3622b-3p	3.14219	0.248854
1281	hsa-miR-3622b-5p	4.51138	6.15667
1282	hsa-miR-3646	4.74337	7.10375
1283	hsa-miR-3648	1.7186	1.77447
1284	hsa-miR-3649	1.38828	1.99214
1285	hsa-miR-3650	3.45523	2.41652
1286	hsa-miR-3651	13.8567	3.43562
1287	hsa-miR-3652	6.95118	3.28139
1288	hsa-miR-3653	8.56546	2.26451
1289	hsa-miR-3654	2.67114	2.20157
1290	hsa-miR-3655	3.35591	0.00397263
1291	hsa-miR-3656	1845.49	1892.67
1292	hsa-miR-3657	2.81462	0.00400575
1293	hsa-miR-3658	0.339741	0.00317551
1294	hsa-miR-3659	0.208111	0.0053929
1295	hsa-miR-3660	0.0380718	0.00262661
1296	hsa-miR-3661	4.67209	3.13736
1297	hsa-miR-3662	1.033	0.00262661
1298	hsa-miR-3663-3p	6.36574	0.00439623
1299	hsa-miR-3663-5p	0.0380718	0.0137897
1300	hsa-miR-3664-3p	0.466576	0.00262661
1301	hsa-miR-3664-5p	0.0380718	0.00262661
1302	hsa-miR-3665	5022.14	4909.78
1303	hsa-miR-3666	5.93836	0.198596
1304	hsa-miR-3667-3p	9.32133	1.08911
1305	hsa-miR-3667-5p	8.35739	0.900981
1306	hsa-miR-3668	0.0726861	0.686219
1307	hsa-miR-3669	1.26479	0.00262661
1308	hsa-miR-3670	0.0250241	0.312275
1309	hsa-miR-3671	1.9752	1.3888
1310	hsa-miR-3672	3.3775	0.317036
1311	hsa-miR-3673	3.94332	0.00424522
1312	hsa-miR-3674	1.54286	0.889791
1313	hsa-miR-3675-3p	4.95263	3.58569
1314	hsa-miR-3675-5p	2.33673	0.390686
1315	hsa-miR-3677-3p	2.61933	0.00262661
1316	hsa-miR-3677-5p	0.0380718	0.00262661
1317	hsa-miR-3678-3p	1.00127	0.00262661
1318	hsa-miR-3678-5p	0.0380718	0.00262661
1319	hsa-miR-3679-3p	3.99727	1.61247
1320	hsa-miR-3679-5p	3.7599	0.00379329
1321	hsa-miR-3680-3p	0.0380718	0.494456
1322	hsa-miR-3680-5p	0.574009	0.00330848
1323	hsa-miR-3681-3p	2.82555	0.00262661
1324	hsa-miR-3681-5p	0.271564	0.836426
1325	hsa-miR-3682-3p	0.541239	0.0343479
1326	hsa-miR-3682-5p	0.0380718	0.00262661
1327	hsa-miR-3683	5.50644	0.00262661
1328	hsa-miR-3684	0.0380718	0.00262661
1329	hsa-miR-3685	0.0380718	0.00262661
1330	hsa-miR-3686	4.03116	0.028384
1331	hsa-miR-3687	1.78073	0.65429
1332	hsa-miR-3688-3p	0.732846	1.19672
1333	hsa-miR-3688-5p	1.60977	0.904285
1334	hsa-miR-3689a-3p	2.23421	1.44678
1335	hsa-miR-3689a-5p	1.84059	0.00391265
1336	hsa-miR-3689b-3p	2.11212	1.57149
1337	hsa-miR-3689d	1.53587	0.578396
1338	hsa-miR-3689f	0.46374	1.26322
1339	hsa-miR-3690	0.0380718	0.728161
1340	hsa-miR-3691-3p	1.72088	0.805372
1341	hsa-miR-3691-5p	2.09612	3.24253
1342	hsa-miR-3692-3p	1.55226	0.478374
1343	hsa-miR-3692-5p	1.75628	2.5494
1344	hsa-miR-3713	1.52219	0.00362906
1345	hsa-miR-3714	3.8194	1.96062
1346	hsa-miR-3907	3.01105	7.62727
1347	hsa-miR-3908	0.646228	6.66983
1348	hsa-miR-3909	2.38614	2.6021
1349	hsa-miR-3910	0.438451	10.1536
1350	hsa-miR-3911	0.14455	5.65099
1351	hsa-miR-3912-3p	0.237816	8.13018
1352	hsa-miR-3912-5p	0.0632246	5.21789
1353	hsa-miR-3913-3p	0.246298	4.41309
1354	hsa-miR-3913-5p	0.453185	4.90103
1355	hsa-miR-3914	0.189817	5.70328
1356	hsa-miR-3915	0.335017	0.460413
1357	hsa-miR-3916	0.218534	1.15781
1358	hsa-miR-3917	1.71798	1.31229
1359	hsa-miR-3918	0.235717	0.00262661
1360	hsa-miR-3919	1.36189	0.495426
1361	hsa-miR-3920	0.124035	0.00262661
1362	hsa-miR-3921	0.523592	0.43339
1363	hsa-miR-3922-3p	1.91512	0.00262661
1364	hsa-miR-3922-5p	0.0380718	0.11776
1365	hsa-miR-3923	0.0380718	0.0389614
1366	hsa-miR-3924	0.64031	1.17075
1367	hsa-miR-3925-3p	2.5876	0.00262661
1368	hsa-miR-3925-5p	0.807367	0.00341406
1369	hsa-miR-3926	24.0747	7.98323
1370	hsa-miR-3927-3p	4.65738	0.742488
1371	hsa-miR-3927-5p	4.97207	0.121081
1372	hsa-miR-3928-3p	4.65491	0.22483
1373	hsa-miR-3928-5p	6.6157	1.85487
1374	hsa-miR-3929	1.70537	1.92037
1375	hsa-miR-3934-3p	4.67815	0.00419493
1376	hsa-miR-3934-5p	3.25987	0.464972
1377	hsa-miR-3935	5.47845	3.92298
1378	hsa-miR-3936	6.38008	0.14197
1379	hsa-miR-3937	15.9237	1.02744
1380	hsa-miR-3938	1.4192	0.157975
1381	hsa-miR-3939	8.72365	0.45251
1382	hsa-miR-3940-3p	2.78382	0.693496
1383	hsa-miR-3940-5p	779.988	691.647
1384	hsa-miR-3941	12.093	0.00367755
1385	hsa-miR-3942-3p	0.509513	0.00262661
1386	hsa-miR-3942-5p	0.0380718	0.00262661
1387	hsa-miR-3943	9.2494	0.117965
1388	hsa-miR-3944-3p	0.0380718	0.00262661
1389	hsa-miR-3944-5p	0.0380718	0.00262661
1390	hsa-miR-3945	3.65098	0.0251656
1391	hsa-miR-3960	5714.67	5256.31
1392	hsa-miR-3972	3.39903	0.22597
1393	hsa-miR-3973	2.32101	0.00262661
1394	hsa-miR-3974	4.56028	0.00262661
1395	hsa-miR-3975	2.74046	0.00408892
1396	hsa-miR-3976	1.20687	0.0788693
1397	hsa-miR-3977	1.82708	0.00389054
1398	hsa-miR-3978	1.17165	0.00262661
1399	hsa-miR-4251	0.0380718	0.00262661
1400	hsa-miR-4252	2.94318	2.50112
1401	hsa-miR-4253	14.263	0.788101
1402	hsa-miR-4254	9.39684	0.00444005
1403	hsa-miR-4255	2.00947	0.00262661
1404	hsa-miR-4256	2.37826	0.00262661
1405	hsa-miR-4257	0.0902536	0.00262661
1406	hsa-miR-4258	5.4733	5.66694
1407	hsa-miR-4259	0.669725	0.00262661
1408	hsa-miR-4260	3.15353	0.00262661
1409	hsa-miR-4261	3.12569	0.00403962
1410	hsa-miR-4262	0.58166	0.00262661
1411	hsa-miR-4263	0.0380718	0.00262661
1412	hsa-miR-4264	3.30914	0.00383524
1413	hsa-miR-4265	6.03176	0.00262661
1414	hsa-miR-4266	5.97675	0.00449835
1415	hsa-miR-4267	2677.23	661.142
1416	hsa-miR-4268	6.44988	1.0928
1417	hsa-miR-4269	9.28328	0.099777
1418	hsa-miR-4270	6.05178	4.64732
1419	hsa-miR-4271	6.80275	4.78222
1420	hsa-miR-4272	3.38336	0.00419957
1421	hsa-miR-4273	6.87373	1.08658
1422	hsa-miR-4274	11.7664	7.89152
1423	hsa-miR-4275	1.58894	0.00262661
1424	hsa-miR-4276	3.67529	0.998789
1425	hsa-miR-4277	3.17848	0.11878
1426	hsa-miR-4278	2.10472	0.00392573
1427	hsa-miR-4279	2.9117	6.68391
1428	hsa-miR-4280	28.5888	18.0186
1429	hsa-miR-4281	713.968	644.215
1430	hsa-miR-4282	1.16206	0.349273
1431	hsa-miR-4283	0.0380718	0.756433
1432	hsa-miR-4284	9.56088	3.14193
1433	hsa-miR-4285	0.0380718	0.00262661
1434	hsa-miR-4286	47.1018	30.0509
1435	hsa-miR-4287	0.711614	0.072733
1436	hsa-miR-4288	68.7032	22.0294
1437	hsa-miR-4289	62.8837	39.0178
1438	hsa-miR-4290	12.7883	0.00471095
1439	hsa-miR-4291	0.725559	0.00262661
1440	hsa-miR-4292	5.54603	1.66464
1441	hsa-miR-4293	2.57866	0.00262661
1442	hsa-miR-4294	7.35631	0.00454018
1443	hsa-miR-4295	0.851057	0.328822
1444	hsa-miR-4296	4.77286	3.66671
1445	hsa-miR-4297	2.17706	3.9573
1446	hsa-miR-4298	22.5448	24.765
1447	hsa-miR-4299	2.76607	1.39985
1448	hsa-miR-4300	3.77053	0.00417888
1449	hsa-miR-4301	161.406	123.781
1450	hsa-miR-4302	3.51006	1.8655
1451	hsa-miR-4303	0.686834	2.8301
1452	hsa-miR-4304	2.73511	1.83638
1453	hsa-miR-4305	4.07525	4.61689
1454	hsa-miR-4306	105.845	144.925
1455	hsa-miR-4307	2.93726	0.981379
1456	hsa-miR-4308	5.3949	0.598346
1457	hsa-miR-4309	0.847182	1.04844
1458	hsa-miR-4310	3.28881	5.72416
1459	hsa-miR-4311	3.7917	0.892405
1460	hsa-miR-4312	0.0234379	1.21326
1461	hsa-miR-4313	7.50124	9.63454
1462	hsa-miR-4314	2.67913	2.68604
1463	hsa-miR-4315	8.01883	0.0175462
1464	hsa-miR-4316	1.47368	1.65296
1465	hsa-miR-4317	838.228	519.815
1466	hsa-miR-4318	6.03809	3.15343
1467	hsa-miR-4319	2.04321	3.75044
1468	hsa-miR-4320	2.01714	0.400711
1469	hsa-miR-4321	94.3237	92.1815
1470	hsa-miR-4322	1.1785	9.3585
1471	hsa-miR-4323	9.06512	3.53041
1472	hsa-miR-4324	1069.47	874.524
1473	hsa-miR-4325	31.8354	26.3441
1474	hsa-miR-4326	5.23261	8.41154
1475	hsa-miR-4327	7.711	0.309594
1476	hsa-miR-4328	1.43401	3.99536
1477	hsa-miR-4329	0.0380718	0.471535
1478	hsa-miR-4330	2.25447	0.00262661
1479	hsa-miR-4417	1.71121	1.45508
1480	hsa-miR-4418	0.743963	0.00306501
1481	hsa-miR-4419a	8.03182	3.82363
1482	hsa-miR-4419b	17.5632	11.2793
1483	hsa-miR-4420	4.1566	1.97349
1484	hsa-miR-4421	5.57653	0.571263
1485	hsa-miR-4422	4.96203	1.23317
1486	hsa-miR-4423-3p	6.69322	0.958894
1487	hsa-miR-4423-5p	5.23101	1.72252
1488	hsa-miR-4424	3.64655	3.4459
1489	hsa-miR-4425	4.92648	3.23304
1490	hsa-miR-4426	6.77346	3.48093
1491	hsa-miR-4427	2.91635	6.74375
1492	hsa-miR-4428	5.27075	2.31212
1493	hsa-miR-4429	44.4905	52.3678
1494	hsa-miR-4430	5.39892	5.34556
1495	hsa-miR-4431	1.09645	0.016254
1496	hsa-miR-4432	2.88754	0.00414131
1497	hsa-miR-4433-3p	36.6761	29.5846
1498	hsa-miR-4433-5p	13.674	11.7055
1499	hsa-miR-4433b-3p	58.3939	58.1126
1500	hsa-miR-4433b-5p	14.6984	17.4394
1501	hsa-miR-4434	1.62952	1.02341
1502	hsa-miR-4435	4.64982	0.0409025
1503	hsa-miR-4436a	0.0852134	0.00262661
1504	hsa-miR-4436b-3p	4.22845	0.988556
1505	hsa-miR-4436b-5p	3.61871	0.00262661
1506	hsa-miR-4437	1.19163	0.00262661
1507	hsa-miR-4438	1.19163	0.00262661
1508	hsa-miR-4439	2.26504	0.00393368
1509	hsa-miR-4440	0.0380718	0.0367726
1510	hsa-miR-4441	1.17577	0.00262661
1511	hsa-miR-4442	9.89361	6.93872
1512	hsa-miR-4443	770.721	886.689
1513	hsa-miR-4444	5.96199	2.33172
1514	hsa-miR-4445-3p	3.82055	0.278258
1515	hsa-miR-4445-5p	6.27056	2.03999
1516	hsa-miR-4446-3p	1.08173	0.433382
1517	hsa-miR-4446-5p	3.62644	5.75576
1518	hsa-miR-4447	570.399	456.359
1519	hsa-miR-4448	16.1655	8.58473
1520	hsa-miR-4449	8.52988	2.95993
1521	hsa-miR-4450	0.573193	1.39003
1522	hsa-miR-4451	8.12516	4.10195
1523	hsa-miR-4452	5.86445	4.4167
1524	hsa-miR-4453	2.15742	14.7476
1525	hsa-miR-4454	110.397	126.218
1526	hsa-miR-4455	42.4096	55.2885
1527	hsa-miR-4456	0.0203535	4.90824
1528	hsa-miR-4457	0.0229735	2.3665
1529	hsa-miR-4458	1.64081	3.95769
1530	hsa-miR-4459	60.1147	60.1116
1531	hsa-miR-4460	3.44139	1.79894
1532	hsa-miR-4461	1.28681	0.300141
1533	hsa-miR-4462	4.12822	7.06154
1534	hsa-miR-4463	140.801	156.549
1535	hsa-miR-4464	0.0380718	0.0126953
1536	hsa-miR-4465	0.0380718	0.00262661
1537	hsa-miR-4466	564.623	548.083
1538	hsa-miR-4467	3.14937	4.64937
1539	hsa-miR-4468	2.22154	2.66454
1540	hsa-miR-4469	0.531207	1.20545
1541	hsa-miR-4470	1.24854	3.18039
1542	hsa-miR-4471	0.17909	1.5442
1543	hsa-miR-4472	295.949	257.553
1544	hsa-miR-4473	3.69656	0.00411536
1545	hsa-miR-4474-3p	0.842641	0.0633974
1546	hsa-miR-4474-5p	3.23799	0.33494
1547	hsa-miR-4475	0.023857	0.868755
1548	hsa-miR-4476	1.988	0.582091
1549	hsa-miR-4477a	0.0219468	2.46363
1550	hsa-miR-4477b	0.907822	1.68366
1551	hsa-miR-4478	7.71202	5.24978
1552	hsa-miR-4479	4.77073	1.20691
1553	hsa-miR-4480	0.541239	0.515035
1554	hsa-miR-4481	4.6395	6.45522
1555	hsa-miR-4482-3p	6.45266	0.564254
1556	hsa-miR-4482-5p	0.0380718	0.517219
1557	hsa-miR-4483	0.0380718	0.0189823
1558	hsa-miR-4484	68.5123	45.5208
1559	hsa-miR-4485	14.4307	17.4566
1560	hsa-miR-4486	9.71218	7.83072
1561	hsa-miR-4487	1.66829	0.265304
1562	hsa-miR-4488	1917.23	2185.56
1563	hsa-miR-4489	0.0380718	0.00262661
1564	hsa-miR-4490	0.0380718	0.00262661
1565	hsa-miR-4491	0.0380718	0.00262661
1566	hsa-miR-4492	151.066	185.115
1567	hsa-miR-4493	0.0380718	0.00262661
1568	hsa-miR-4494	0.0380718	0.271626
1569	hsa-miR-4495	0.0380718	0.0556334
1570	hsa-miR-4496	0.0380718	0.365905
1571	hsa-miR-4497	11253.6	13575.4
1572	hsa-miR-4498	2.1405	0.490299
1573	hsa-miR-4499	5.43582	3.03069
1574	hsa-miR-4500	31.0801	9.16489
1575	hsa-miR-4501	2.71752	3.93014
1576	hsa-miR-4502	3.45521	3.67451
1577	hsa-miR-4503	2.99927	4.65539
1578	hsa-miR-4504	3.18952	7.72079
1579	hsa-miR-4505	45.556	38.3122
1580	hsa-miR-4506	2.40954	1.66916
1581	hsa-miR-4507	12.2757	15.2171
1582	hsa-miR-4508	1273.39	1670.4
1583	hsa-miR-4509	0.324198	1.65995
1584	hsa-miR-4510	20.5911	4.07264
1585	hsa-miR-4511	0.0213308	2.74803
1586	hsa-miR-4512	1.23402	0.826978
1587	hsa-miR-4513	2.36501	6.12496
1588	hsa-miR-4514	0.225808	1.47726
1589	hsa-miR-4515	0.0232675	1.2577
1590	hsa-miR-4516	3271.13	3599.17
1591	hsa-miR-4517	1.75386	6.10385
1592	hsa-miR-4518	1.91364	10.5152
1593	hsa-miR-4519	3.52368	6.6804
1594	hsa-miR-4520a-3p	5.77817	13.2359
1595	hsa-miR-4520a-5p	13.1665	8.2528
1596	hsa-miR-4520b-3p	2.54191	7.73636
1597	hsa-miR-4521	127.915	151.527
1598	hsa-miR-4522	1.93418	6.41428
1599	hsa-miR-4523	0.0205962	9.19211
1600	hsa-miR-4524a-3p	0.0200858	6.46624
1601	hsa-miR-4524a-5p	1.1696	7.88448
1602	hsa-miR-4524b-3p	0.0200647	4.92557
1603	hsa-miR-4524b-5p	0.0225754	1.40256
1604	hsa-miR-4525	0.0380718	0.590809
1605	hsa-miR-4526	0.0380718	0.128611
1606	hsa-miR-4527	2.38762	0.833829
1607	hsa-miR-4528	0.0212739	3.66378
1608	hsa-miR-4529-3p	1.11232	0.00262661
1609	hsa-miR-4529-5p	0.0380718	0.00262661
1610	hsa-miR-4530	217.595	230.427
1611	hsa-miR-4531	0.271564	0.00262661
1612	hsa-miR-4532	796.042	813.433
1613	hsa-miR-4533	0.969547	0.18452
1614	hsa-miR-4534	16.6947	10.2599
1615	hsa-miR-4535	12.8736	5.06831
1616	hsa-miR-4536-3p	2.59109	3.97932
1617	hsa-miR-4536-5p	5.03727	0.583546
1618	hsa-miR-4537	5.53817	0.00262661
1619	hsa-miR-4538	6.79768	0.154083
1620	hsa-miR-4539	3.55878	2.31659
1621	hsa-miR-4540	2.98451	1.38904
1622	hsa-miR-4632-3p	6.82979	0.298985
1623	hsa-miR-4632-5p	99.8047	95.0623
1624	hsa-miR-4633-3p	4.02437	0.407498
1625	hsa-miR-4633-5p	1.79288	0.0337032
1626	hsa-miR-4634	15.4318	6.63784
1627	hsa-miR-4635	5.44299	0.00262661
1628	hsa-miR-4636	1.84203	0.00262661
1629	hsa-miR-4637	0.0380718	0.00262661
1630	hsa-miR-4638-3p	5.51774	0.00262661
1631	hsa-miR-4638-5p	860.179	304.654
1632	hsa-miR-4639-3p	0.0380718	0.236612
1633	hsa-miR-4639-5p	0.0380718	0.542396
1634	hsa-miR-4640-3p	2.85843	3.69603
1635	hsa-miR-4640-5p	0.0301175	0.313318
1636	hsa-miR-4641	0.188127	0.00262661
1637	hsa-miR-4642	2.55265	0.00291512
1638	hsa-miR-4643	0.0380718	0.00262661
1639	hsa-miR-4644	3.40955	1.50635
1640	hsa-miR-4645-3p	1.96713	3.88885
1641	hsa-miR-4645-5p	1.39373	0.00262661
1642	hsa-miR-4646-3p	9.00938	3.96697
1643	hsa-miR-4646-5p	4.68907	0.885923
1644	hsa-miR-4647	3.95087	2.4213
1645	hsa-miR-4648	2.30048	1.38748
1646	hsa-miR-4649-3p	0.25158	0.00262661
1647	hsa-miR-4649-5p	32.9481	22.3462
1648	hsa-miR-4650-3p	1.06061	0.00262661
1649	hsa-miR-4650-5p	2.22361	0.0456645
1650	hsa-miR-4651	6.89841	8.76056
1651	hsa-miR-4652-3p	5.86014	1.17635
1652	hsa-miR-4652-5p	4.52407	0.00405212
1653	hsa-miR-4653-3p	0.20399	0.00262661
1654	hsa-miR-4653-5p	0.579469	0.00262661
1655	hsa-miR-4654	2.56637	0.00389464
1656	hsa-miR-4655-3p	7.50364	0.167592
1657	hsa-miR-4655-5p	11.8204	1.1772
1658	hsa-miR-4656	3.33726	0.90145
1659	hsa-miR-4657	3.25786	0.00406247
1660	hsa-miR-4658	0.0380718	0.00262661
1661	hsa-miR-4659a-3p	1.57436	0.00262661
1662	hsa-miR-4659a-5p	0.0380718	0.00262661
1663	hsa-miR-4659b-3p	0.0380718	0.00262661
1664	hsa-miR-4659b-5p	0.444839	0.00262661
1665	hsa-miR-4660	1.53822	0.00393141
1666	hsa-miR-4661-3p	1.74356	0.00262661
1667	hsa-miR-4661-5p	0.0380718	0.00262661
1668	hsa-miR-4662a-3p	3.70977	0.00262661
1669	hsa-miR-4662a-5p	4.10635	0.00262661
1670	hsa-miR-4662b	2.82329	0.00415558
1671	hsa-miR-4663	2.77162	0.00387603
1672	hsa-miR-4664-3p	4.9328	0.522039
1673	hsa-miR-4664-5p	28.6129	24.1052
1674	hsa-miR-4665-3p	3.3849	0.00357633
1675	hsa-miR-4665-5p	1.92777	0.682198
1676	hsa-miR-4666a-3p	2.14981	0.00388892
1677	hsa-miR-4666a-5p	3.10425	0.00420434
1678	hsa-miR-4666b	5.08718	3.85749
1679	hsa-miR-4667-3p	3.36215	1.42308
1680	hsa-miR-4667-5p	13.5471	9.16501
1681	hsa-miR-4668-3p	6.73003	0.00262661
1682	hsa-miR-4668-5p	25.5352	5.05418
1683	hsa-miR-4669	2.50418	0.00391826
1684	hsa-miR-4670-3p	4.61861	0.00434975
1685	hsa-miR-4670-5p	0.0305856	0.0200258
1686	hsa-miR-4671-3p	2.20984	0.0038713
1687	hsa-miR-4671-5p	0.98129	0.00262661
1688	hsa-miR-4672	1.3959	1.75697
1689	hsa-miR-4673	0.524329	0.00262661
1690	hsa-miR-4674	14.3078	3.18958
1691	hsa-miR-4675	0.0380718	0.00262661
1692	hsa-miR-4676-3p	2.91381	0.00262661
1693	hsa-miR-4676-5p	0.0380718	0.00262661
1694	hsa-miR-4677-3p	3.43715	0.598248
1695	hsa-miR-4677-5p	5.91165	0.0711583
1696	hsa-miR-4678	4.4917	0.00424715
1697	hsa-miR-4679	0.362623	0.00262661
1698	hsa-miR-4680-3p	1.50932	0.00375234
1699	hsa-miR-4680-5p	2.40711	0.651797
1700	hsa-miR-4681	6.23805	0.0650275
1701	hsa-miR-4682	5.32008	0.0567632
1702	hsa-miR-4683	4.954	1.5619
1703	hsa-miR-4684-3p	5.83341	4.74758
1704	hsa-miR-4684-5p	1.67624	0.312947
1705	hsa-miR-4685-3p	6.06713	4.07367
1706	hsa-miR-4685-5p	5.93474	5.65549
1707	hsa-miR-4686	6.20234	1.4161
1708	hsa-miR-4687-3p	277.99	231.876
1709	hsa-miR-4687-5p	11.4659	7.78354
1710	hsa-miR-4688	6.84384	5.67395
1711	hsa-miR-4689	2.36836	2.31066
1712	hsa-miR-4690-3p	3.75844	1.41845
1713	hsa-miR-4690-5p	94.3345	65.5524
1714	hsa-miR-4691-3p	1.27214	0.805404
1715	hsa-miR-4691-5p	3.32528	6.34043
1716	hsa-miR-4692	2.35824	2.46082
1717	hsa-miR-4693-3p	1.07961	0.21558
1718	hsa-miR-4693-5p	0.380583	2.29985
1719	hsa-miR-4694-3p	0.146575	2.98924
1720	hsa-miR-4694-5p	0.483322	1.10815
1721	hsa-miR-4695-3p	3.15667	2.14686
1722	hsa-miR-4695-5p	9.48068	10.7807
1723	hsa-miR-4696	0.0380718	0.140743
1724	hsa-miR-4697-3p	2.45893	5.52614
1725	hsa-miR-4697-5p	3.50953	1.31176
1726	hsa-miR-4698	5.1516	13.2853
1727	hsa-miR-4699-3p	0.962112	7.81004
1728	hsa-miR-4699-5p	1.26403	3.73921
1729	hsa-miR-4700-3p	4.6829	8.08303
1730	hsa-miR-4700-5p	1.28363	3.54041
1731	hsa-miR-4701-3p	3.00114	5.98822
1732	hsa-miR-4701-5p	6.08074	11.9575
1733	hsa-miR-4703-3p	2.78803	7.63176
1734	hsa-miR-4703-5p	2.58996	6.04393
1735	hsa-miR-4704-3p	1.82745	4.34679
1736	hsa-miR-4704-5p	1.43384	4.98755
1737	hsa-miR-4705	0.878914	4.42716
1738	hsa-miR-4706	0.975233	5.6043
1739	hsa-miR-4707-3p	4.63171	8.44648
1740	hsa-miR-4707-5p	309.166	341.544
1741	hsa-miR-4708-3p	5.52823	5.03177
1742	hsa-miR-4708-5p	2.95577	2.60703
1743	hsa-miR-4709-3p	2.77526	2.65303
1744	hsa-miR-4709-5p	1.80327	3.06731
1745	hsa-miR-4710	7.45883	11.4021
1746	hsa-miR-4711-3p	0.314887	2.4487
1747	hsa-miR-4711-5p	3.02424	2.90309
1748	hsa-miR-4712-3p	11.5874	4.64861
1749	hsa-miR-4712-5p	4.65137	1.06821
1750	hsa-miR-4713-3p	2.44512	0.504469
1751	hsa-miR-4713-5p	6.98672	6.45873
1752	hsa-miR-4714-3p	3.08406	2.21
1753	hsa-miR-4714-5p	6.67055	7.43727
1754	hsa-miR-4715-3p	3.89666	6.78537
1755	hsa-miR-4715-5p	5.29383	2.38412
1756	hsa-miR-4716-3p	8.68663	0.0729725
1757	hsa-miR-4716-5p	10.615	6.42656
1758	hsa-miR-4717-3p	8.31102	2.5148
1759	hsa-miR-4717-5p	8.75469	5.84137
1760	hsa-miR-4718	3.61591	0.0975766
1761	hsa-miR-4719	6.17542	0.538346
1762	hsa-miR-4720-3p	2.46383	5.52246
1763	hsa-miR-4720-5p	2.47927	0.205965
1764	hsa-miR-4721	5.89062	2.18385
1765	hsa-miR-4722-3p	4.35416	14.5204
1766	hsa-miR-4722-5p	4.7186	1.0234
1767	hsa-miR-4723-3p	7.70259	0.626051
1768	hsa-miR-4723-5p	1.51431	0.180458
1769	hsa-miR-4724-3p	2.64383	0.331564
1770	hsa-miR-4724-5p	1.71129	1.4206
1771	hsa-miR-4725-3p	5.57446	0.272159
1772	hsa-miR-4725-5p	6.20501	2.19406
1773	hsa-miR-4726-3p	4.71216	0.00404838
1774	hsa-miR-4726-5p	3.22207	0.0399406
1775	hsa-miR-4727-3p	3.91297	1.54897
1776	hsa-miR-4727-5p	2.93028	2.86997
1777	hsa-miR-4728-3p	6.35533	4.43792
1778	hsa-miR-4728-5p	9.58064	2.46972
1779	hsa-miR-4729	3.40321	1.14132
1780	hsa-miR-4730	3.71128	1.32432
1781	hsa-miR-4731-3p	13.0216	1.47669
1782	hsa-miR-4731-5p	8.38668	0.494347
1783	hsa-miR-4732-3p	7.62431	2.20731
1784	hsa-miR-4732-5p	17.6836	11.9084
1785	hsa-miR-4733-3p	9.66837	2.40326
1786	hsa-miR-4733-5p	13.5694	5.0344
1787	hsa-miR-4734	61230.1	41598.4
1788	hsa-miR-4735-3p	8.67642	20.0021
1789	hsa-miR-4735-5p	2.16935	6.45965
1790	hsa-miR-4736	3.01849	7.68659
1791	hsa-miR-4737	1.42397	22.5888
1792	hsa-miR-4738-3p	0.142509	5.108
1793	hsa-miR-4738-5p	0.573151	0.908669
1794	hsa-miR-4739	37.8639	36.027
1795	hsa-miR-4740-3p	0.0243844	1.42483
1796	hsa-miR-4740-5p	1.15556	1.70994
1797	hsa-miR-4741	30.7413	40.4976
1798	hsa-miR-4742-3p	0.0380718	0.114538
1799	hsa-miR-4742-5p	0.0380718	0.00262661
1800	hsa-miR-4743-3p	0.0380718	0.163957
1801	hsa-miR-4743-5p	2.91062	2.11124
1802	hsa-miR-4744	0.0380718	0.0984029
1803	hsa-miR-4745-3p	0.0380718	0.296667
1804	hsa-miR-4745-5p	0.891126	2.40236
1805	hsa-miR-4746-3p	0.0380718	0.452395
1806	hsa-miR-4746-5p	1.04757	1.30822
1807	hsa-miR-4747-3p	5.98566	3.16748
1808	hsa-miR-4747-5p	4.53325	0.00435024
1809	hsa-miR-4748	1.7122	2.51753
1810	hsa-miR-4749-3p	9.29441	9.28734
1811	hsa-miR-4749-5p	4.6181	0.00262661
1812	hsa-miR-4750-3p	14.9678	16.0264
1813	hsa-miR-4750-5p	1.07929	1.97393
1814	hsa-miR-4751	3.78887	1.8585
1815	hsa-miR-4752	0.784709	1.30113
1816	hsa-miR-4753-3p	1.96264	0.720139
1817	hsa-miR-4753-5p	3.25664	4.92327
1818	hsa-miR-4754	1.83846	2.03922
1819	hsa-miR-4755-3p	3.5098	1.25337
1820	hsa-miR-4755-5p	1.59965	1.13471
1821	hsa-miR-4756-3p	0.0380718	0.187066
1822	hsa-miR-4756-5p	0.0380718	0.165807
1823	hsa-miR-4757-3p	6.08757	0.00409877
1824	hsa-miR-4757-5p	0.0380718	0.0892336
1825	hsa-miR-4758-3p	5.63897	2.33015
1826	hsa-miR-4758-5p	3.62781	0.603126
1827	hsa-miR-4759	1.20346	1.20007
1828	hsa-miR-4760-3p	0.0380718	1.97983
1829	hsa-miR-4760-5p	0.0380718	0.00262661
1830	hsa-miR-4761-3p	0.0380718	0.00262661
1831	hsa-miR-4761-5p	0.0380718	0.00262661
1832	hsa-miR-4762-3p	0.0380718	0.868981
1833	hsa-miR-4762-5p	0.0380718	0.0815799
1834	hsa-miR-4763-3p	2.08871	1.70105
1835	hsa-miR-4763-5p	1.05485	0.772278
1836	hsa-miR-4764-3p	221.465	89.2706
1837	hsa-miR-4764-5p	3.85208	3.4303
1838	hsa-miR-4765	2.60346	0.422559
1839	hsa-miR-4766-3p	0.608807	0.851338
1840	hsa-miR-4766-5p	4.12461	0.862917
1841	hsa-miR-4767	3.76386	9.33015
1842	hsa-miR-4768-3p	0.997629	3.361
1843	hsa-miR-4768-5p	3.59103	0.899859
1844	hsa-miR-4769-3p	12.3507	12.2758
1845	hsa-miR-4769-5p	4.86525	4.83552
1846	hsa-miR-4770	1.51089	4.67075
1847	hsa-miR-4771	2.37153	4.80849
1848	hsa-miR-4772-3p	1.87379	2.8496
1849	hsa-miR-4772-5p	3.90515	4.70655
1850	hsa-miR-4773	2.14996	7.29748
1851	hsa-miR-4774-3p	0.0214623	3.12877
1852	hsa-miR-4774-5p	1.12215	2.37795
1853	hsa-miR-4775	0.0221939	4.50366
1854	hsa-miR-4776-3p	3.38698	1.15214
1855	hsa-miR-4776-5p	1.15829	3.77384
1856	hsa-miR-4777-3p	12.6352	1.43596
1857	hsa-miR-4777-5p	1.13307	3.491
1858	hsa-miR-4778-3p	3.20409	3.72535
1859	hsa-miR-4778-5p	38.7135	25.7066
1860	hsa-miR-4779	1.94928	4.07914
1861	hsa-miR-4780	0.0380718	0.00262661
1862	hsa-miR-4781-3p	0.53849	1.73161
1863	hsa-miR-4781-5p	0.021905	2.42844
1864	hsa-miR-4782-3p	0.0237014	2.82761
1865	hsa-miR-4782-5p	0.0211548	2.65637
1866	hsa-miR-4783-3p	1.75764	6.42194
1867	hsa-miR-4783-5p	3.46217	7.64398
1868	hsa-miR-4784	3.61182	6.88204
1869	hsa-miR-4785	0.743998	3.11527
1870	hsa-miR-4786-3p	2.16938	8.24536
1871	hsa-miR-4786-5p	1.05319	5.86822
1872	hsa-miR-4787-3p	4.17369	10.1595
1873	hsa-miR-4787-5p	2886.48	3216.18
1874	hsa-miR-4788	2.0869	15.2486
1875	hsa-miR-4789-3p	0.892736	3.82231
1876	hsa-miR-4789-5p	3.4689	6.68947
1877	hsa-miR-4790-3p	1.80017	11.8369
1878	hsa-miR-4790-5p	0.714172	10.1275
1879	hsa-miR-4791	12.3749	15.5089
1880	hsa-miR-4792	1.70711	7.21918
1881	hsa-miR-4793-3p	2.83653	0.00262661
1882	hsa-miR-4793-5p	2.70225	0.215704
1883	hsa-miR-4794	0.0380718	0.00262661
1884	hsa-miR-4795-3p	0.0380718	0.00262661
1885	hsa-miR-4795-5p	0.416024	0.497146
1886	hsa-miR-4796-3p	0.0380718	0.00262661
1887	hsa-miR-4796-5p	0.0380718	0.00262661
1888	hsa-miR-4797-3p	3.91563	0.247016
1889	hsa-miR-4797-5p	1.17732	0.0280172
1890	hsa-miR-4798-3p	0.522888	0.0103178
1891	hsa-miR-4798-5p	1.90739	0.00262661
1892	hsa-miR-4799-3p	1.08015	0.00262661
1893	hsa-miR-4799-5p	0.0380718	0.00262661
1894	hsa-miR-4800-3p	313.25	201.774
1895	hsa-miR-4800-5p	4.00427	3.66866
1896	hsa-miR-4801	4.82596	0.0426284
1897	hsa-miR-4802-3p	1.34689	1.5792
1898	hsa-miR-4802-5p	3.36831	0.254309
1899	hsa-miR-4803	3.40446	1.21603
1900	hsa-miR-4804-3p	6.2139	0.322858
1901	hsa-miR-4804-5p	0.0380718	0.00262661
1902	hsa-miR-4999-3p	4.58225	0.00262661
1903	hsa-miR-4999-5p	0.0380718	0.0662427
1904	hsa-miR-5000-3p	1.23871	0.00262661
1905	hsa-miR-5000-5p	2.6285	0.00413649
1906	hsa-miR-5001-3p	0.0380718	0.00262661
1907	hsa-miR-5001-5p	863.42	608.374
1908	hsa-miR-5002-3p	1.18751	0.00262661
1909	hsa-miR-5002-5p	0.0380718	0.126515
1910	hsa-miR-5003-3p	0.0380718	0.00262661
1911	hsa-miR-5003-5p	0.0380718	0.00262661
1912	hsa-miR-5004-3p	0.0380718	0.00262661
1913	hsa-miR-5004-5p	0.568845	0.00262661
1914	hsa-miR-5006-3p	0.0380718	0.00262661
1915	hsa-miR-5006-5p	3.78067	0.0409125
1916	hsa-miR-5007-3p	0.0380718	0.00262661
1917	hsa-miR-5007-5p	0.287217	0.00262661
1918	hsa-miR-5008-3p	1.38525	0.00262661
1919	hsa-miR-5008-5p	0.0380718	0.00262661
1920	hsa-miR-5009-3p	3.45596	0.00262661
1921	hsa-miR-5009-5p	1.23752	0.0386994
1922	hsa-miR-5010-3p	4.00611	1.21392
1923	hsa-miR-5010-5p	9.84577	3.93932
1924	hsa-miR-5011-3p	0.597514	0.00262661
1925	hsa-miR-5011-5p	6.57389	2.44041
1926	hsa-miR-5047	0.605943	0.00262661
1927	hsa-miR-5087	0.0380718	0.00262661
1928	hsa-miR-5088-3p	1.09233	0.00262661
1929	hsa-miR-5088-5p	0.0380718	0.0875011
1930	hsa-miR-5089-3p	2.91696	0.00385738
1931	hsa-miR-5089-5p	0.0380718	0.131987
1932	hsa-miR-5090	3.55761	0.0897486
1933	hsa-miR-5091	3.41856	1.12732
1934	hsa-miR-5092	3.38963	2.1959
1935	hsa-miR-5093	4.02044	1.49714
1936	hsa-miR-5094	5.16377	2.19967
1937	hsa-miR-5095	10.3317	2.91648
1938	hsa-miR-5096	2592.08	602.778
1939	hsa-miR-5100	35.9042	36.0587
1940	hsa-miR-5186	1.76276	6.202
1941	hsa-miR-5187-3p	1.642	1.12615
1942	hsa-miR-5187-5p	1.63532	5.24814
1943	hsa-miR-5188	0.740463	1.92688
1944	hsa-miR-5189-3p	2.04507	0.00262661
1945	hsa-miR-5189-5p	1.5669	1.96208
1946	hsa-miR-5190	4.1926	3.06686
1947	hsa-miR-5191	2.13043	5.61158
1948	hsa-miR-5192	3.94702	9.10688
1949	hsa-miR-5193	5.51164	5.40631
1950	hsa-miR-5194	4.5423	5.20486
1951	hsa-miR-5195-3p	9.54366	4.14307
1952	hsa-miR-5195-5p	6.21549	1.63452
1953	hsa-miR-5196-3p	8.61469	3.39692
1954	hsa-miR-5196-5p	13.1071	9.42732
1955	hsa-miR-5197-3p	3.52382	1.36544
1956	hsa-miR-5197-5p	3.60464	1.10338
1957	hsa-miR-5571-3p	0.0380718	0.00262661
1958	hsa-miR-5571-5p	2.81611	0.8782
1959	hsa-miR-5572	26.1743	20.5326
1960	hsa-miR-5579-3p	0.579213	0.00262661
1961	hsa-miR-5579-5p	1.79524	0.344922
1962	hsa-miR-5580-3p	2.73901	3.82897
1963	hsa-miR-5580-5p	2.97939	0.00381396
1964	hsa-miR-5581-3p	7.31397	0.908322
1965	hsa-miR-5581-5p	0.024599	0.519813
1966	hsa-miR-5582-3p	5.17801	0.130893
1967	hsa-miR-5582-5p	0.0380718	0.210335
1968	hsa-miR-5583-3p	0.311776	0.185522
1969	hsa-miR-5583-5p	1.98218	0.319789
1970	hsa-miR-5584-3p	0.0253943	0.536782
1971	hsa-miR-5584-5p	1.975	0.00381479
1972	hsa-miR-5585-3p	0.0380718	0.00262661
1973	hsa-miR-5585-5p	0.0380718	0.00262661
1974	hsa-miR-5586-3p	0.884153	0.00262661
1975	hsa-miR-5586-5p	0.0380718	0.00262661
1976	hsa-miR-5587-3p	0.0380718	0.00262661
1977	hsa-miR-5587-5p	0.0380718	0.00262661
1978	hsa-miR-5588-3p	0.0380718	0.00262661
1979	hsa-miR-5588-5p	0.0380718	0.00262661
1980	hsa-miR-5589-3p	0.0380718	0.00262661
1981	hsa-miR-5589-5p	0.0380718	0.00262661
1982	hsa-miR-5590-3p	2.3138	0.00262661
1983	hsa-miR-5590-5p	0.0380718	0.283943
1984	hsa-miR-5591-3p	0.0380718	0.00262661
1985	hsa-miR-5591-5p	0.0380718	0.00262661
1986	hsa-miR-5680	4.59513	0.169125
1987	hsa-miR-5681a	0.0380718	0.0132938
1988	hsa-miR-5681b	4.40327	5.55828
1989	hsa-miR-5682	1.5353	0.00262661
1990	hsa-miR-5683	1.72722	0.00262661
1991	hsa-miR-5684	3.91147	0.970782
1992	hsa-miR-5685	2.0654	0.00262661
1993	hsa-miR-5687	2.46926	0.00262661
1994	hsa-miR-5688	0.0380718	0.134451
1995	hsa-miR-5689	0.0380718	0.00262661
1996	hsa-miR-5690	0.0380718	0.00262661
1997	hsa-miR-5691	0.0380718	0.00262661
1998	hsa-miR-5692a	0.158144	0.117204
[truncated: 606 more rows]

## Sheet: Normalized Data
		S01 SMC1-cy3 Signal			S02 SMC2-cy3 Signal									MRA-1001B2_miRHuman_20.xls
Index	Reporter Name	Mean	StDev	p-value	Mean	StDev	p-value	Target Sequence (5' to 3')	Reporter Group	Reporter Control Type	Note	Reporter Source	Accession No.	Reporter Name	Human
1	hsa-let-7a-2-3p	0.0212262	7.0698	1	2.51636	15.0534	0.921842	CUGUACAGCCUCCUAGCUUUCC	experimental		mature miRNA	standard	MIMAT0010195	hsa-let-7a-2-3p	hsa-let-7a-2-3p
2	hsa-let-7a-3p	41.254	15.9306	0.00580546	39.6824	23.2018	0.127677	CUAUACAAUCUACUGUCUUUC	experimental		mature miRNA	standard	MIMAT0004481	hsa-let-7a-3p	hsa-let-7a-3p
3	hsa-let-7a-5p	8953.04	606.768	1.0393e-39	7869.42	594.989	2.61955e-41	UGAGGUAGUAGGUUGUAUAGUU	experimental		mature miRNA	standard	MIMAT0000062	hsa-let-7a-5p	hsa-let-7a-5p
4	hsa-let-7b-3p	18.6175	9.89128	0.0610012	20.4587	17.1245	0.336265	CUAUACAACCUACUGCCUUCCC	experimental		mature miRNA	standard	MIMAT0004482	hsa-let-7b-3p	hsa-let-7b-3p
5	hsa-let-7b-5p	2741.29	190.688	1.51555e-37	2166.97	190.449	1.91564e-30	UGAGGUAGUAGGUUGUGUGGUU	experimental		mature miRNA	standard	MIMAT0000063	hsa-let-7b-5p	hsa-let-7b-5p
6	hsa-let-7c-3p	1.95276	8.95556	1	1.67258	14.2961	1	CUGUACAACCUUCUAGCUUUCC	experimental		mature miRNA	standard	MIMAT0026472	hsa-let-7c-3p	hsa-let-7c-3p
7	hsa-let-7c-5p	5011.35	531.192	5.59786e-20	4455.11	543.72	1.55692e-15	UGAGGUAGUAGGUUGUAUGGUU	experimental		mature miRNA	standard	MIMAT0000064	hsa-let-7c-5p	hsa-let-7c-5p
8	hsa-let-7d-3p	29.755	12.2321	0.00880489	35.1352	18.5003	0.115164	CUAUACGACCUGCUGCCUUUCU	experimental		mature miRNA	standard	MIMAT0004484	hsa-let-7d-3p	hsa-let-7d-3p
9	hsa-let-7d-5p	5708.47	611.685	8.93577e-18	5204.68	559.942	5.53742e-20	AGAGGUAGUAGGUUGCAUAGUU	experimental		mature miRNA	standard	MIMAT0000065	hsa-let-7d-5p	hsa-let-7d-5p
10	hsa-let-7e-3p	3.99196	7.70347	0.787983	1.6937	15.0812	1	CUAUACGGCCUCCUAGCUUUCC	experimental		mature miRNA	standard	MIMAT0004485	hsa-let-7e-3p	hsa-let-7e-3p
11	hsa-let-7e-5p	5044.01	538.856	3.08646e-18	4330.03	578.011	1.88569e-13	UGAGGUAGGAGGUUGUAUAGUU	experimental		mature miRNA	standard	MIMAT0000066	hsa-let-7e-5p	hsa-let-7e-5p
12	hsa-let-7f-1-3p	10.3733	7.52741	0.24939	10.9091	14.8289	0.523296	CUAUACAAUCUAUUGCCUUCCC	experimental		mature miRNA	standard	MIMAT0004486	hsa-let-7f-1-3p	hsa-let-7f-1-3p
13	hsa-let-7f-2-3p	27.0828	10.7383	0.0124408	22.1341	19.9743	0.303711	CUAUACAGUCUACUGUCUUUCC	experimental		mature miRNA	standard	MIMAT0004487	hsa-let-7f-2-3p	hsa-let-7f-2-3p
14	hsa-let-7f-5p	8894.74	716.585	3.08676e-33	7873.09	889.636	3.92316e-18	UGAGGUAGUAGAUUGUAUAGUU	experimental		mature miRNA	standard	MIMAT0000067	hsa-let-7f-5p	hsa-let-7f-5p
15	hsa-let-7g-3p	2.26935	7.05986	0.854748	4.71376	13.4356	0.716388	CUGUACAGGCCACUGCCUUGC	experimental		mature miRNA	standard	MIMAT0004584	hsa-let-7g-3p	hsa-let-7g-3p
16	hsa-let-7g-5p	2743.45	220.27	8.51098e-32	2643.31	261.151	3.01328e-22	UGAGGUAGUAGUUUGUACAGUU	experimental		mature miRNA	standard	MIMAT0000414	hsa-let-7g-5p	hsa-let-7g-5p
17	hsa-let-7i-3p	2.36103	7.8634	0.868517	3.04321	11.7049	0.83626	CUGCGCAAGCUACUGCCUUGCU	experimental		mature miRNA	standard	MIMAT0004585	hsa-let-7i-3p	hsa-let-7i-3p
18	hsa-let-7i-5p	1141.39	94.6163	2.59398e-33	1145.54	123.532	2.12594e-20	UGAGGUAGUAGUUUGUGCUGUU	experimental		mature miRNA	standard	MIMAT0000415	hsa-let-7i-5p	hsa-let-7i-5p
19	hsa-miR-1	2.65522	7.00646	0.874306	2.42302	12.9584	0.976853	UGGAAUGUAAAGAAGUAUGUAU	experimental		mature miRNA	standard	MIMAT0000416	hsa-miR-1	hsa-miR-1
20	hsa-miR-7-1-3p	49.4175	14.3445	0.00012621	47.5314	15.9568	0.0469196	CAACAAAUCACAGUCUGCCAUA	experimental		mature miRNA	standard	MIMAT0004553	hsa-miR-7-1-3p	hsa-miR-7-1-3p
21	hsa-miR-7-2-3p	0.0224406	5.75693	1	2.12583	13.0571	0.669115	CAACAAAUCCCAGUCUACCUAA	experimental		mature miRNA	standard	MIMAT0004554	hsa-miR-7-2-3p	hsa-miR-7-2-3p
22	hsa-miR-7-5p	44.8804	11.9754	2.02024e-05	67.2403	19.0535	0.00689333	UGGAAGACUAGUGAUUUUGUUGU	experimental		mature miRNA	standard	MIMAT0000252	hsa-miR-7-5p	hsa-miR-7-5p
23	hsa-miR-9-3p	4.15677	9.00586	0.790677	5.52669	17.6612	0.624809	AUAAAGCUAGAUAACCGAAAGU	experimental		mature miRNA	standard	MIMAT0000442	hsa-miR-9-3p	hsa-miR-9-3p
24	hsa-miR-9-5p	2.32841	7.06679	0.754108	12.0961	24.6148	0.499529	UCUUUGGUUAUCUAGCUGUAUGA	experimental		mature miRNA	standard	MIMAT0000441	hsa-miR-9-5p	hsa-miR-9-5p
25	hsa-miR-10a-3p	7.80948	7.60027	0.643911	0.0043825	13.4749	1	CAAAUUCGUAUCUAGGGGAAUA	experimental		mature miRNA	standard	MIMAT0004555	hsa-miR-10a-3p	hsa-miR-10a-3p
26	hsa-miR-10a-5p	328.963	45.7044	1.38269e-12	296.958	50.336	6.5036e-08	UACCCUGUAGAUCCGAAUUUGUG	experimental		mature miRNA	standard	MIMAT0000253	hsa-miR-10a-5p	hsa-miR-10a-5p
27	hsa-miR-10b-3p	3.57788	7.13258	0.936372	0.00419493	14.5304	1	ACAGAUUCGAUUCUAGGGGAAU	experimental		mature miRNA	standard	MIMAT0004556	hsa-miR-10b-3p	hsa-miR-10b-3p
28	hsa-miR-10b-5p	372.597	53.2636	2.74585e-13	301.855	38.8115	4.76867e-12	UACCCUGUAGAACCGAAUUUGUG	experimental		mature miRNA	standard	MIMAT0000254	hsa-miR-10b-5p	hsa-miR-10b-5p
29	hsa-miR-15a-3p	5.06113	8.62801	0.668937	2.3331	11.6626	0.721372	CAGGCCAUAUUGUGCUGCCUCA	experimental		mature miRNA	standard	MIMAT0004488	hsa-miR-15a-3p	hsa-miR-15a-3p
30	hsa-miR-15a-5p	200.242	28.626	1.77425e-13	282.573	50.5196	0.000121104	UAGCAGCACAUAAUGGUUUGUG	experimental		mature miRNA	standard	MIMAT0000068	hsa-miR-15a-5p	hsa-miR-15a-5p
31	hsa-miR-15b-3p	20.946	10.8835	0.0442206	24.1739	19.5008	0.243806	CGAAUCAUUAUUUGCUGCUCUA	experimental		mature miRNA	standard	MIMAT0004586	hsa-miR-15b-3p	hsa-miR-15b-3p
32	hsa-miR-15b-5p	1742.87	180.628	3.34312e-21	3056.2	277.029	1.49372e-11	UAGCAGCACAUCAUGGUUUACA	experimental		mature miRNA	standard	MIMAT0000417	hsa-miR-15b-5p	hsa-miR-15b-5p
33	hsa-miR-16-1-3p	3.2321	8.32469	0.744736	10.4441	19.818	0.451385	CCAGUAUUAACUGUGCUGCUGA	experimental		mature miRNA	standard	MIMAT0004489	hsa-miR-16-1-3p	hsa-miR-16-1-3p
34	hsa-miR-16-2-3p	18.9283	11.043	0.0777173	26.3694	16.4584	0.169191	CCAAUAUUACUGUGCUGCUUUA	experimental		mature miRNA	standard	MIMAT0004518	hsa-miR-16-2-3p	hsa-miR-16-2-3p
35	hsa-miR-16-5p	3082.14	220.173	1.32255e-43	4573.56	252.407	7.24279e-21	UAGCAGCACGUAAAUAUUGGCG	experimental		mature miRNA	standard	MIMAT0000069	hsa-miR-16-5p	hsa-miR-16-5p
36	hsa-miR-17-3p	4.05891	7.42225	0.665742	4.83177	18.0425	0.639779	ACUGCAGUGAAGGCACUUGUAG	experimental		mature miRNA	standard	MIMAT0000071	hsa-miR-17-3p	hsa-miR-17-3p
37	hsa-miR-17-5p	98.825	17.8326	7.64758e-09	117.611	22.9384	0.000216168	CAAAGUGCUUACAGUGCAGGUAG	experimental		mature miRNA	standard	MIMAT0000070	hsa-miR-17-5p	hsa-miR-17-5p
38	hsa-miR-18a-3p	3.75157	7.90888	0.854932	0.170293	10.1552	1	ACUGCCCUAAGUGCUCCUUCUGG	experimental		mature miRNA	standard	MIMAT0002891	hsa-miR-18a-3p	hsa-miR-18a-3p
39	hsa-miR-18a-5p	11.9699	10.0083	0.523478	0.361547	11.0883	1	UAAGGUGCAUCUAGUGCAGAUAG	experimental		mature miRNA	standard	MIMAT0000072	hsa-miR-18a-5p	hsa-miR-18a-5p
40	hsa-miR-18b-3p	5.06631	7.31335	0.637505	2.94627	11.4448	0.752157	UGCCCUAAAUGCCCCUUCUGGC	experimental		mature miRNA	standard	MIMAT0004751	hsa-miR-18b-3p	hsa-miR-18b-3p
41	hsa-miR-18b-5p	2.00518	7.578	0.909605	4.85219	12.8962	0.801592	UAAGGUGCAUCUAGUGCAGUUAG	experimental		mature miRNA	standard	MIMAT0001412	hsa-miR-18b-5p	hsa-miR-18b-5p
42	hsa-miR-19a-3p	11.2438	9.71785	0.4575	0.821893	14.876	1	UGUGCAAAUCUAUGCAAAACUGA	experimental		mature miRNA	standard	MIMAT0000073	hsa-miR-19a-3p	hsa-miR-19a-3p
43	hsa-miR-19a-5p	0.30329	6.19613	1	0.123232	12.7095	1	AGUUUUGCAUAGUUGCACUACA	experimental		mature miRNA	standard	MIMAT0004490	hsa-miR-19a-5p	hsa-miR-19a-5p
44	hsa-miR-19b-1-5p	0.0380718	5.28136	1	0.00262661	12.9823	1	AGUUUUGCAGGUUUGCAUCCAGC	experimental		mature miRNA	standard	MIMAT0004491	hsa-miR-19b-1-5p	hsa-miR-19b-1-5p
45	hsa-miR-19b-2-5p	4.00696	10.5012	0.873124	0.00431392	14.4333	1	AGUUUUGCAGGUUUGCAUUUCA	experimental		mature miRNA	standard	MIMAT0004492	hsa-miR-19b-2-5p	hsa-miR-19b-2-5p
46	hsa-miR-19b-3p	47.499	16.0001	0.00194543	33.5221	22.7766	0.168943	UGUGCAAAUCCAUGCAAAACUGA	experimental		mature miRNA	standard	MIMAT0000074	hsa-miR-19b-3p	hsa-miR-19b-3p
47	hsa-miR-20a-3p	3.8463	8.37119	0.781565	0.0648863	12.003	1	ACUGCAUUAUGAGCACUUAAAG	experimental		mature miRNA	standard	MIMAT0004493	hsa-miR-20a-3p	hsa-miR-20a-3p
48	hsa-miR-20a-5p	90.2532	18.9119	5.01309e-07	111.077	35.9821	0.00527844	UAAAGUGCUUAUAGUGCAGGUAG	experimental		mature miRNA	standard	MIMAT0000075	hsa-miR-20a-5p	hsa-miR-20a-5p
49	hsa-miR-20b-3p	0.0380718	6.44934	1	0.00262661	13.1337	1	ACUGUAGUAUGGGCACUUCCAG	experimental		mature miRNA	standard	MIMAT0004752	hsa-miR-20b-3p	hsa-miR-20b-3p
50	hsa-miR-20b-5p	56.5177	20.1707	0.00304101	59.6312	29.6424	0.0979038	CAAAGUGCUCAUAGUGCAGGUAG	experimental		mature miRNA	standard	MIMAT0001413	hsa-miR-20b-5p	hsa-miR-20b-5p
51	hsa-miR-21-3p	3.92581	6.39151	0.677379	1.42026	11.6563	0.820989	CAACACCAGUCGAUGGGCUGU	experimental		mature miRNA	standard	MIMAT0004494	hsa-miR-21-3p	hsa-miR-21-3p
52	hsa-miR-21-5p	2234.43	513.392	1.55063e-05	2411.36	669.949	0.00096822	UAGCUUAUCAGACUGAUGUUGA	experimental		mature miRNA	standard	MIMAT0000076	hsa-miR-21-5p	hsa-miR-21-5p
53	hsa-miR-22-3p	386.628	34.2743	1.47195e-28	430.698	70.7122	1.90249e-08	AAGCUGCCAGUUGAAGAACUGU	experimental		mature miRNA	standard	MIMAT0000077	hsa-miR-22-3p	hsa-miR-22-3p
54	hsa-miR-22-5p	57.4144	17.5841	0.000311593	65.3434	19.14	0.00834023	AGUUCUUCAGUGGCAAGCUUUA	experimental		mature miRNA	standard	MIMAT0004495	hsa-miR-22-5p	hsa-miR-22-5p
55	hsa-miR-23a-3p	5007.67	337.717	1.11895e-40	5198.53	441.347	1.04853e-14	AUCACAUUGCCAGGGAUUUCC	experimental		mature miRNA	standard	MIMAT0000078	hsa-miR-23a-3p	hsa-miR-23a-3p
56	hsa-miR-23a-5p	7.91123	8.0389	0.459562	3.76346	14.249	0.819783	GGGGUUCCUGGGGAUGGGAUUU	experimental		mature miRNA	standard	MIMAT0004496	hsa-miR-23a-5p	hsa-miR-23a-5p
57	hsa-miR-23b-3p	4589.66	241.526	9.67338e-61	4698.06	420.549	7.63652e-15	AUCACAUUGCCAGGGAUUACC	experimental		mature miRNA	standard	MIMAT0000418	hsa-miR-23b-3p	hsa-miR-23b-3p
58	hsa-miR-23b-5p	7.19309	7.89698	0.53231	4.37481	14.4817	0.804832	UGGGUUCCUGGCAUGCUGAUUU	experimental		mature miRNA	standard	MIMAT0004587	hsa-miR-23b-5p	hsa-miR-23b-5p
59	hsa-miR-23c	201.761	26.0981	2.51473e-13	154.014	29.5486	2.98426e-05	AUCACAUUGCCAGUGAUUACCC	experimental		mature miRNA	standard	MIMAT0018000	hsa-miR-23c	hsa-miR-23c
60	hsa-miR-24-1-5p	4.49719	8.21022	0.821228	0.375354	11.8086	0.983481	UGCCUACUGAGCUGAUAUCAGU	experimental		mature miRNA	standard	MIMAT0000079	hsa-miR-24-1-5p	hsa-miR-24-1-5p
61	hsa-miR-24-2-5p	19.7076	10.6423	0.0709696	14.8378	19.0502	0.311429	UGCCUACUGAGCUGAAACACAG	experimental		mature miRNA	standard	MIMAT0004497	hsa-miR-24-2-5p	hsa-miR-24-2-5p
62	hsa-miR-24-3p	5194.86	282.044	4.15613e-65	5089.97	484.426	1.51906e-10	UGGCUCAGUUCAGCAGGAACAG	experimental		mature miRNA	standard	MIMAT0000080	hsa-miR-24-3p	hsa-miR-24-3p
63	hsa-miR-25-3p	760.239	104.179	2.39248e-13	681.915	89.9522	1.22075e-12	CAUUGCACUUGUCUCGGUCUGA	experimental		mature miRNA	standard	MIMAT0000081	hsa-miR-25-3p	hsa-miR-25-3p
64	hsa-miR-25-5p	1.76843	6.84016	1	0.11549	15.9958	1	AGGCGGAGACUUGGGCAAUUG	experimental		mature miRNA	standard	MIMAT0004498	hsa-miR-25-5p	hsa-miR-25-5p
65	hsa-miR-26a-1-3p	0.659641	7.69655	1	0.00262661	14.2782	1	CCUAUUCUUGGUUACUUGCACG	experimental		mature miRNA	standard	MIMAT0004499	hsa-miR-26a-1-3p	hsa-miR-26a-1-3p
66	hsa-miR-26a-2-3p	6.50774	10.6246	0.785811	0.00452072	12.3817	1	CCUAUUCUUGAUUACUUGUUUC	experimental		mature miRNA	standard	MIMAT0004681	hsa-miR-26a-2-3p	hsa-miR-26a-2-3p
67	hsa-miR-26a-5p	5298.32	430.399	7.33247e-35	4984.55	443.939	3.28694e-14	UUCAAGUAAUCCAGGAUAGGCU	experimental		mature miRNA	standard	MIMAT0000082	hsa-miR-26a-5p	hsa-miR-26a-5p
68	hsa-miR-26b-3p	2.96832	9.06885	1	0.00262661	14.4005	1	CCUGUUCUCCAUUACUUGGCUC	experimental		mature miRNA	standard	MIMAT0004500	hsa-miR-26b-3p	hsa-miR-26b-3p
69	hsa-miR-26b-5p	4630.65	479.093	7.13905e-22	4157.33	386.138	4.28114e-16	UUCAAGUAAUUCAGGAUAGGU	experimental		mature miRNA	standard	MIMAT0000083	hsa-miR-26b-5p	hsa-miR-26b-5p
70	hsa-miR-27a-3p	683.912	77.5409	5.41111e-19	716.634	83.8424	4.99657e-10	UUCACAGUGGCUAAGUUCCGC	experimental		mature miRNA	standard	MIMAT0000084	hsa-miR-27a-3p	hsa-miR-27a-3p
71	hsa-miR-27a-5p	0.0380718	6.55114	1	0.0737245	17.2511	1	AGGGCUUAGCUGCUUGUGAGCA	experimental		mature miRNA	standard	MIMAT0004501	hsa-miR-27a-5p	hsa-miR-27a-5p
72	hsa-miR-27b-3p	178.393	38.993	1.80947e-06	182.287	38.5514	0.000160792	UUCACAGUGGCUAAGUUCUGC	experimental		mature miRNA	standard	MIMAT0000419	hsa-miR-27b-3p	hsa-miR-27b-3p
73	hsa-miR-27b-5p	2.613	9.06547	1	0.489823	14.3593	1	AGAGCUUAGCUGAUUGGUGAAC	experimental		mature miRNA	standard	MIMAT0004588	hsa-miR-27b-5p	hsa-miR-27b-5p
74	hsa-miR-28-3p	57.0008	14.2629	2.90705e-05	68.4812	18.1111	0.00343203	CACUAGAUUGUGAGCUCCUGGA	experimental		mature miRNA	standard	MIMAT0004502	hsa-miR-28-3p	hsa-miR-28-3p
75	hsa-miR-28-5p	113.251	23.3488	2.70688e-07	145.412	32.6049	0.000226155	AAGGAGCUCACAGUCUAUUGAG	experimental		mature miRNA	standard	MIMAT0000085	hsa-miR-28-5p	hsa-miR-28-5p
76	hsa-miR-29a-3p	890.246	79.8346	6.60588e-29	770.434	83.6097	1.77558e-10	UAGCACCAUCUGAAAUCGGUUA	experimental		mature miRNA	standard	MIMAT0000086	hsa-miR-29a-3p	hsa-miR-29a-3p
77	hsa-miR-29a-5p	6.55008	6.9042	0.425032	3.9946	13.5554	0.712178	ACUGAUUUCUUUUGGUGUUCAG	experimental		mature miRNA	standard	MIMAT0004503	hsa-miR-29a-5p	hsa-miR-29a-5p
78	hsa-miR-29b-1-5p	4.17431	7.25764	0.769412	2.22104	13.3972	0.776699	GCUGGUUUCAUAUGGUGGUUUAGA	experimental		mature miRNA	standard	MIMAT0004514	hsa-miR-29b-1-5p	hsa-miR-29b-1-5p
79	hsa-miR-29b-2-5p	2.6119	7.91047	0.858321	2.82588	16.4368	0.791773	CUGGUUUCACAUGGUGGCUUAG	experimental		mature miRNA	standard	MIMAT0004515	hsa-miR-29b-2-5p	hsa-miR-29b-2-5p
80	hsa-miR-29b-3p	162.226	25.2224	7.98731e-12	183.074	49.1492	0.000299254	UAGCACCAUUUGAAAUCAGUGUU	experimental		mature miRNA	standard	MIMAT0000100	hsa-miR-29b-3p	hsa-miR-29b-3p
81	hsa-miR-29c-3p	530.828	50.2873	5.51413e-27	328.652	45.9797	2.78151e-12	UAGCACCAUUUGAAAUCGGUUA	experimental		mature miRNA	standard	MIMAT0000681	hsa-miR-29c-3p	hsa-miR-29c-3p
82	hsa-miR-29c-5p	15.6497	10.2651	0.159819	6.68059	17.5899	0.637507	UGACCGAUUUCUCCUGGUGUUC	experimental		mature miRNA	standard	MIMAT0004673	hsa-miR-29c-5p	hsa-miR-29c-5p
83	hsa-miR-30a-3p	21.2252	11.6577	0.0829682	4.57933	13.7799	0.666764	CUUUCAGUCGGAUGUUUGCAGC	experimental		mature miRNA	standard	MIMAT0000088	hsa-miR-30a-3p	hsa-miR-30a-3p
84	hsa-miR-30a-5p	605.296	49.6233	5.09737e-35	713.609	87.0388	8.12905e-11	UGUAAACAUCCUCGACUGGAAG	experimental		mature miRNA	standard	MIMAT0000087	hsa-miR-30a-5p	hsa-miR-30a-5p
85	hsa-miR-30b-3p	35.7563	14.6284	0.0115002	28.4912	16.5842	0.178401	CUGGGAGGUGGAUGUUUACUUC	experimental		mature miRNA	standard	MIMAT0004589	hsa-miR-30b-3p	hsa-miR-30b-3p
86	hsa-miR-30b-5p	2671.73	242.493	1.61314e-28	2965.25	280.309	1.35737e-21	UGUAAACAUCCUACACUCAGCU	experimental		mature miRNA	standard	MIMAT0000420	hsa-miR-30b-5p	hsa-miR-30b-5p
87	hsa-miR-30c-1-3p	84.7349	18.1965	3.2489e-07	83.1886	25.0505	0.00697011	CUGGGAGAGGGUUGUUUACUCC	experimental		mature miRNA	standard	MIMAT0004674	hsa-miR-30c-1-3p	hsa-miR-30c-1-3p
88	hsa-miR-30c-2-3p	13.7174	9.17964	0.182461	3.79995	13.4695	0.687215	CUGGGAGAAGGCUGUUUACUCU	experimental		mature miRNA	standard	MIMAT0004550	hsa-miR-30c-2-3p	hsa-miR-30c-2-3p
89	hsa-miR-30c-5p	2630.95	289.777	7.39167e-20	3016.06	236.654	3.70091e-17	UGUAAACAUCCUACACUCUCAGC	experimental		mature miRNA	standard	MIMAT0000244	hsa-miR-30c-5p	hsa-miR-30c-5p
90	hsa-miR-30d-3p	2.0575	5.63244	0.83084	1.0646	12.4526	0.861895	CUUUCAGUCAGAUGUUUGCUGC	experimental		mature miRNA	standard	MIMAT0004551	hsa-miR-30d-3p	hsa-miR-30d-3p
91	hsa-miR-30d-5p	245.675	26.1717	8.23376e-23	305.736	37.2869	2.12688e-10	UGUAAACAUCCCCGACUGGAAG	experimental		mature miRNA	standard	MIMAT0000245	hsa-miR-30d-5p	hsa-miR-30d-5p
92	hsa-miR-30e-3p	122.414	26.3509	5.24029e-07	124.466	28.9669	6.18327e-05	CUUUCAGUCGGAUGUUUACAGC	experimental		mature miRNA	standard	MIMAT0000693	hsa-miR-30e-3p	hsa-miR-30e-3p
93	hsa-miR-30e-5p	522.63	46.8674	9.45439e-30	619.07	84.2416	5.51962e-07	UGUAAACAUCCUUGACUGGAAG	experimental		mature miRNA	standard	MIMAT0000692	hsa-miR-30e-5p	hsa-miR-30e-5p
94	hsa-miR-31-3p	1.89103	8.25155	0.902331	1.61058	15.2135	0.836752	UGCUAUGCCAACAUAUUGCCAU	experimental		mature miRNA	standard	MIMAT0004504	hsa-miR-31-3p	hsa-miR-31-3p
95	hsa-miR-31-5p	6.01292	8.43734	0.612498	5.27886	13.8581	0.637645	AGGCAAGAUGCUGGCAUAGCU	experimental		mature miRNA	standard	MIMAT0000089	hsa-miR-31-5p	hsa-miR-31-5p
96	hsa-miR-32-3p	19.1617	8.63691	0.0214527	17.5852	13.7677	0.284358	CAAUUUAGUGUGUGUGAUAUUU	experimental		mature miRNA	standard	MIMAT0004505	hsa-miR-32-3p	hsa-miR-32-3p
97	hsa-miR-32-5p	10.4818	7.35306	0.186849	9.02789	15.614	0.511667	UAUUGCACAUUACUAAGUUGCA	experimental		mature miRNA	standard	MIMAT0000090	hsa-miR-32-5p	hsa-miR-32-5p
98	hsa-miR-33a-3p	8.31282	9.43388	0.438168	2.97768	13.7237	0.762361	CAAUGUUUCCACAGUGCAUCAC	experimental		mature miRNA	standard	MIMAT0004506	hsa-miR-33a-3p	hsa-miR-33a-3p
99	hsa-miR-33a-5p	3.12111	6.13861	0.745841	0.799111	15.1355	0.896711	GUGCAUUGUAGUUGCAUUGCA	experimental		mature miRNA	standard	MIMAT0000091	hsa-miR-33a-5p	hsa-miR-33a-5p
100	hsa-miR-33b-3p	3.04302	6.76965	0.882213	0.299895	12.3673	1	CAGUGCCUCGGCAGUGCAGCCC	experimental		mature miRNA	standard	MIMAT0004811	hsa-miR-33b-3p	hsa-miR-33b-3p
101	hsa-miR-33b-5p	0.997153	5.8372	1	0.284252	11.6587	0.972531	GUGCAUUGCUGUUGCAUUGC	experimental		mature miRNA	standard	MIMAT0003301	hsa-miR-33b-5p	hsa-miR-33b-5p
102	hsa-miR-34a-3p	6.75735	6.25462	0.331066	5.83597	13.9756	0.572375	CAAUCAGCAAGUAUACUGCCCU	experimental		mature miRNA	standard	MIMAT0004557	hsa-miR-34a-3p	hsa-miR-34a-3p
103	hsa-miR-34a-5p	86.0439	26.0886	0.000198663	111.062	33.0352	0.0087537	UGGCAGUGUCUUAGCUGGUUGU	experimental		mature miRNA	standard	MIMAT0000255	hsa-miR-34a-5p	hsa-miR-34a-5p
104	hsa-miR-34b-3p	6.42791	7.86176	0.450706	3.25168	14.3423	0.760618	CAAUCACUAACUCCACUGCCAU	experimental		mature miRNA	standard	MIMAT0004676	hsa-miR-34b-3p	hsa-miR-34b-3p
105	hsa-miR-34b-5p	13.4491	9.20837	0.163855	11.1862	13.474	0.361078	UAGGCAGUGUCAUUAGCUGAUUG	experimental		mature miRNA	standard	MIMAT0000685	hsa-miR-34b-5p	hsa-miR-34b-5p
106	hsa-miR-34c-3p	8.05797	6.74734	0.347063	2.46356	13.8849	0.750188	AAUCACUAACCACACGGCCAGG	experimental		mature miRNA	standard	MIMAT0004677	hsa-miR-34c-3p	hsa-miR-34c-3p
107	hsa-miR-34c-5p	1.24021	5.93479	0.875609	1.63248	13.6045	0.763283	AGGCAGUGUAGUUAGCUGAUUGC	experimental		mature miRNA	standard	MIMAT0000686	hsa-miR-34c-5p	hsa-miR-34c-5p
108	hsa-miR-92a-1-5p	3.20924	6.35463	0.725296	1.22595	11.5679	0.845768	AGGUUGGGAUCGGUUGCAAUGCU	experimental		mature miRNA	standard	MIMAT0004507	hsa-miR-92a-1-5p	hsa-miR-92a-1-5p
109	hsa-miR-92a-2-5p	3.80822	7.02729	0.617773	8.54782	12.661	0.504702	GGGUGGGGAUUUGUUGCAUUAC	experimental		mature miRNA	standard	MIMAT0004508	hsa-miR-92a-2-5p	hsa-miR-92a-2-5p
110	hsa-miR-92a-3p	434.278	43.9604	8.74236e-25	454.267	52.0384	9.00529e-11	UAUUGCACUUGUCCCGGCCUGU	experimental		mature miRNA	standard	MIMAT0000092	hsa-miR-92a-3p	hsa-miR-92a-3p
111	hsa-miR-92b-3p	99.8151	15.9792	8.67694e-12	143.892	38.6189	0.00815658	UAUUGCACUCGUCCCGGCCUCC	experimental		mature miRNA	standard	MIMAT0003218	hsa-miR-92b-3p	hsa-miR-92b-3p
112	hsa-miR-92b-5p	2.2987	5.73576	0.744671	3.39869	12.7146	0.659773	AGGGACGGGACGCGGUGCAGUG	experimental		mature miRNA	standard	MIMAT0004792	hsa-miR-92b-5p	hsa-miR-92b-5p
113	hsa-miR-93-3p	7.78703	8.01463	0.370784	10.9857	17.3262	0.510897	ACUGCUGAGCUAGCACUUCCCG	experimental		mature miRNA	standard	MIMAT0004509	hsa-miR-93-3p	hsa-miR-93-3p
114	hsa-miR-93-5p	102.949	18.7146	1.45321e-09	122.544	28.9822	0.00576288	CAAAGUGCUGUUCGUGCAGGUAG	experimental		mature miRNA	standard	MIMAT0000093	hsa-miR-93-5p	hsa-miR-93-5p
115	hsa-miR-95-3p	2.79356	7.2564	0.708903	9.67003	13.5981	0.359168	UUCAACGGGUAUUUAUUGAGCA	experimental		mature miRNA	standard	MIMAT0000094	hsa-miR-95-3p	hsa-miR-95-3p
116	hsa-miR-95-5p	1.4503	6.55229	0.836205	9.56485	14.9776	0.366413	UCAAUAAAUGUCUGUUGAAUU	experimental		mature miRNA	standard	MIMAT0026473	hsa-miR-95-5p	hsa-miR-95-5p
117	hsa-miR-96-3p	1.77787	6.80983	0.798295	8.95218	12.4366	0.456615	AAUCAUGUGCAGUGCCAAUAUG	experimental		mature miRNA	standard	MIMAT0004510	hsa-miR-96-3p	hsa-miR-96-3p
118	hsa-miR-96-5p	0.928817	6.20292	0.852034	4.08067	12.6794	0.537683	UUUGGCACUAGCACAUUUUUGCU	experimental		mature miRNA	standard	MIMAT0000095	hsa-miR-96-5p	hsa-miR-96-5p
119	hsa-miR-98-3p	9.30578	6.04058	0.108601	20.5749	15.1024	0.117807	CUAUACAACUUACUACUUUCCC	experimental		mature miRNA	standard	MIMAT0022842	hsa-miR-98-3p	hsa-miR-98-3p
120	hsa-miR-98-5p	1791.24	136.632	1.07184e-39	1174.76	211.776	4.71652e-11	UGAGGUAGUAAGUUGUAUUGUU	experimental		mature miRNA	standard	MIMAT0000096	hsa-miR-98-5p	hsa-miR-98-5p
121	hsa-miR-99a-3p	3.34505	7.52667	0.694427	7.82511	14.8992	0.395431	CAAGCUCGCUUCUAUGGGUCUG	experimental		mature miRNA	standard	MIMAT0004511	hsa-miR-99a-3p	hsa-miR-99a-3p
122	hsa-miR-99a-5p	662.959	166.232	3.00081e-05	774.477	91.2272	5.82e-11	AACCCGUAGAUCCGAUCUUGUG	experimental		mature miRNA	standard	MIMAT0000097	hsa-miR-99a-5p	hsa-miR-99a-5p
123	hsa-miR-99b-3p	5.75633	7.74	0.397897	10.7109	15.4147	0.365158	CAAGCUCGUGUCUGUGGGUCCG	experimental		mature miRNA	standard	MIMAT0004678	hsa-miR-99b-3p	hsa-miR-99b-3p
124	hsa-miR-99b-5p	446.789	50.1208	5.59221e-20	529.577	70.9724	6.11629e-08	CACCCGUAGAACCGACCUUGCG	experimental		mature miRNA	standard	MIMAT0000689	hsa-miR-99b-5p	hsa-miR-99b-5p
125	hsa-miR-100-3p	4.64789	6.58726	0.604504	3.71689	13.2934	0.846624	CAAGCUUGUAUCUAUAGGUAUG	experimental		mature miRNA	standard	MIMAT0004512	hsa-miR-100-3p	hsa-miR-100-3p
126	hsa-miR-100-5p	708.587	87.0251	4.91955e-15	562.835	64.4024	1.21027e-15	AACCCGUAGAUCCGAACUUGUG	experimental		mature miRNA	standard	MIMAT0000098	hsa-miR-100-5p	hsa-miR-100-5p
127	hsa-miR-101-3p	21.6415	12.9225	0.107315	24.8108	17.975	0.294848	UACAGUACUGUGAUAACUGAA	experimental		mature miRNA	standard	MIMAT0000099	hsa-miR-101-3p	hsa-miR-101-3p
128	hsa-miR-101-5p	1.38149	6.87204	0.945046	2.08776	14.0118	0.914202	CAGUUAUCACAGUGCUGAUGCU	experimental		mature miRNA	standard	MIMAT0004513	hsa-miR-101-5p	hsa-miR-101-5p
129	hsa-miR-103a-2-5p	5.43473	8.01909	0.616383	2.85657	13.7681	0.896626	AGCUUCUUUACAGUGCUGCCUUG	experimental		mature miRNA	standard	MIMAT0009196	hsa-miR-103a-2-5p	hsa-miR-103a-2-5p
130	hsa-miR-103a-3p	917.491	73.8725	1.27403e-30	883.715	95.1107	2.14906e-13	AGCAGCAUUGUACAGGGCUAUGA	experimental		mature miRNA	standard	MIMAT0000101	hsa-miR-103a-3p	hsa-miR-103a-3p
131	hsa-miR-103b	3.03478	7.79301	0.926438	5.23632	12.3266	0.755733	UCAUAGCCCUGUACAAUGCUGCU	experimental		mature miRNA	standard	MIMAT0007402	hsa-miR-103b	hsa-miR-103b
132	hsa-miR-105-3p	0.290887	7.80974	1	1.94329	14.1455	0.930465	ACGGAUGUUUGAGCAUGUGCUA	experimental		mature miRNA	standard	MIMAT0004516	hsa-miR-105-3p	hsa-miR-105-3p
133	hsa-miR-105-5p	4.7375	7.92842	0.923749	2.32369	15.7101	0.932994	UCAAAUGCUCAGACUCCUGUGGU	experimental		mature miRNA	standard	MIMAT0000102	hsa-miR-105-5p	hsa-miR-105-5p
134	hsa-miR-106a-3p	3.15397	6.96016	0.907708	0.359446	17.4392	1	CUGCAAUGUAAGCACUUCUUAC	experimental		mature miRNA	standard	MIMAT0004517	hsa-miR-106a-3p	hsa-miR-106a-3p
135	hsa-miR-106a-5p	86.2059	21.3817	3.40308e-05	103.889	41.492	0.0222164	AAAAGUGCUUACAGUGCAGGUAG	experimental		mature miRNA	standard	MIMAT0000103	hsa-miR-106a-5p	hsa-miR-106a-5p
136	hsa-miR-106b-3p	15.6381	12.886	0.294768	6.59801	14.8899	0.706641	CCGCACUGUGGGUACUUGCUGC	experimental		mature miRNA	standard	MIMAT0004672	hsa-miR-106b-3p	hsa-miR-106b-3p
137	hsa-miR-106b-5p	83.2046	22.1895	0.000130641	75.9008	26.7216	0.0139603	UAAAGUGCUGACAGUGCAGAU	experimental		mature miRNA	standard	MIMAT0000680	hsa-miR-106b-5p	hsa-miR-106b-5p
138	hsa-miR-107	883.054	76.8521	9.00305e-30	871.869	119.058	1.62559e-11	AGCAGCAUUGUACAGGGCUAUCA	experimental		mature miRNA	standard	MIMAT0000104	hsa-miR-107	hsa-miR-107
139	hsa-miR-122-3p	4.40525	11.2715	1	0.00262661	13.8431	1	AACGCCAUUAUCACACUAAAUA	experimental		mature miRNA	standard	MIMAT0004590	hsa-miR-122-3p	hsa-miR-122-3p
140	hsa-miR-122-5p	2.08478	6.97523	1	0.00262661	11.7392	1	UGGAGUGUGACAAUGGUGUUUG	experimental		mature miRNA	standard	MIMAT0000421	hsa-miR-122-5p	hsa-miR-122-5p
141	hsa-miR-124-3p	0.366743	6.39194	1	0.370471	12.1564	1	UAAGGCACGCGGUGAAUGCC	experimental		mature miRNA	standard	MIMAT0000422	hsa-miR-124-3p	hsa-miR-124-3p
142	hsa-miR-124-5p	0.0380718	7.0957	1	0.00262661	15.4249	1	CGUGUUCACAGCGGACCUUGAU	experimental		mature miRNA	standard	MIMAT0004591	hsa-miR-124-5p	hsa-miR-124-5p
143	hsa-miR-125a-3p	9.28346	9.02951	0.368238	8.89304	14.4761	0.53577	ACAGGUGAGGUUCUUGGGAGCC	experimental		mature miRNA	standard	MIMAT0004602	hsa-miR-125a-3p	hsa-miR-125a-3p
144	hsa-miR-125a-5p	4521.33	484.18	1.43157e-18	3601.2	1175.51	0.00381375	UCCCUGAGACCCUUUAACCUGUGA	experimental		mature miRNA	standard	MIMAT0000443	hsa-miR-125a-5p	hsa-miR-125a-5p
145	hsa-miR-125b-1-3p	0.458507	6.86478	1	6.19385	25.6644	0.749719	ACGGGUUAGGCUCUUGGGAGCU	experimental		mature miRNA	standard	MIMAT0004592	hsa-miR-125b-1-3p	hsa-miR-125b-1-3p
146	hsa-miR-125b-2-3p	13.3264	10.7865	0.225612	19.5153	20.3134	0.407412	UCACAAGUCAGGCUCUUGGGAC	experimental		mature miRNA	standard	MIMAT0004603	hsa-miR-125b-2-3p	hsa-miR-125b-2-3p
147	hsa-miR-125b-5p	1043.22	132.942	2.75158e-14	961.165	204.626	5.97447e-05	UCCCUGAGACCCUAACUUGUGA	experimental		mature miRNA	standard	MIMAT0000423	hsa-miR-125b-5p	hsa-miR-125b-5p
148	hsa-miR-126-3p	203.264	38.4473	2.18938e-08	197.39	37.0395	4.32333e-06	UCGUACCGUGAGUAAUAAUGCG	experimental		mature miRNA	standard	MIMAT0000445	hsa-miR-126-3p	hsa-miR-126-3p
149	hsa-miR-126-5p	0.0380718	5.99697	1	0.398574	14.396	0.943217	CAUUAUUACUUUUGGUACGCG	experimental		mature miRNA	standard	MIMAT0000444	hsa-miR-126-5p	hsa-miR-126-5p
150	hsa-miR-127-3p	1.9173	8.13335	0.925801	6.09565	16.3267	0.665102	UCGGAUCCGUCUGAGCUUGGCU	experimental		mature miRNA	standard	MIMAT0000446	hsa-miR-127-3p	hsa-miR-127-3p
151	hsa-miR-127-5p	0.585521	6.51507	1	1.80273	11.9868	0.80723	CUGAAGCUCAGAGGGCUCUGAU	experimental		mature miRNA	standard	MIMAT0004604	hsa-miR-127-5p	hsa-miR-127-5p
152	hsa-miR-128-1-5p	2.07405	7.68632	0.902479	1.13426	12.9445	0.896026	CGGGGCCGUAGCACUGUCUGAGA	experimental		mature miRNA	standard	MIMAT0026477	hsa-miR-128-1-5p	hsa-miR-128-1-5p
153	hsa-miR-128-2-5p	2.9985	7.12351	0.923692	0.0039863	14.5259	1	GGGGGCCGAUACACUGUACGAGA	experimental		mature miRNA	standard	MIMAT0031095	hsa-miR-128-2-5p	hsa-miR-128-2-5p
154	hsa-miR-128-3p	40.1261	14.2766	0.0032879	42.2342	20.4295	0.114583	UCACAGUGAACCGGUCUCUUU	experimental		mature miRNA	standard	MIMAT0000424	hsa-miR-128-3p	hsa-miR-128-3p
155	hsa-miR-129-1-3p	4.00701	8.75631	0.874624	0.428317	14.4766	0.976771	AAGCCCUUACCCCAAAAAGUAU	experimental		mature miRNA	standard	MIMAT0004548	hsa-miR-129-1-3p	hsa-miR-129-1-3p
156	hsa-miR-129-2-3p	0.906094	8.2667	1	0.00262661	14.541	1	AAGCCCUUACCCCAAAAAGCAU	experimental		mature miRNA	standard	MIMAT0004605	hsa-miR-129-2-3p	hsa-miR-129-2-3p
157	hsa-miR-129-5p	1.88694	6.91842	1	0.273789	13.1579	0.95178	CUUUUUGCGGUCUGGGCUUGC	experimental		mature miRNA	standard	MIMAT0000242	hsa-miR-129-5p	hsa-miR-129-5p
158	hsa-miR-130a-3p	28.3533	10.5443	0.0064632	10.0811	16.8028	0.539696	CAGUGCAAUGUUAAAAGGGCAU	experimental		mature miRNA	standard	MIMAT0000425	hsa-miR-130a-3p	hsa-miR-130a-3p
159	hsa-miR-130a-5p	2.78824	8.76237	0.978778	0.00379329	15.3111	1	UUCACAUUGUGCUACUGUCUGC	experimental		mature miRNA	standard	MIMAT0004593	hsa-miR-130a-5p	hsa-miR-130a-5p
160	hsa-miR-130b-3p	78.2376	22.3078	0.000132607	87.7387	23.7599	0.0151101	CAGUGCAAUGAUGAAAGGGCAU	experimental		mature miRNA	standard	MIMAT0000691	hsa-miR-130b-3p	hsa-miR-130b-3p
161	hsa-miR-130b-5p	37.9116	14.4045	0.00530809	23.7506	21.1674	0.292524	ACUCUUUCCCUGUUGCACUAC	experimental		mature miRNA	standard	MIMAT0004680	hsa-miR-130b-5p	hsa-miR-130b-5p
162	hsa-miR-132-3p	57.4389	21.677	0.00328628	209.436	37.4777	5.08788e-05	UAACAGUCUACAGCCAUGGUCG	experimental		mature miRNA	standard	MIMAT0000426	hsa-miR-132-3p	hsa-miR-132-3p
163	hsa-miR-132-5p	5.22659	9.18182	0.596446	24.2571	21.6992	0.403467	ACCGUGGCUUUCGAUUGUUACU	experimental		mature miRNA	standard	MIMAT0004594	hsa-miR-132-5p	hsa-miR-132-5p
164	hsa-miR-133a-3p	1.43215	7.93186	1	0.0679186	13.15	0.968819	UUUGGUCCCCUUCAACCAGCUG	experimental		mature miRNA	standard	MIMAT0000427	hsa-miR-133a-3p	hsa-miR-133a-3p
165	hsa-miR-133a-5p	0.0380718	6.65274	1	1.6972	22.891	0.846745	AGCUGGUAAAAUGGAACCAAAU	experimental		mature miRNA	standard	MIMAT0026478	hsa-miR-133a-5p	hsa-miR-133a-5p
166	hsa-miR-133b	6.82332	9.23954	0.726765	1.07635	12.0485	0.953475	UUUGGUCCCCUUCAACCAGCUA	experimental		mature miRNA	standard	MIMAT0000770	hsa-miR-133b	hsa-miR-133b
167	hsa-miR-134-3p	0.0380718	6.70512	1	0.00262661	14.6254	1	CCUGUGGGCCACCUAGUCACCAA	experimental		mature miRNA	standard	MIMAT0026481	hsa-miR-134-3p	hsa-miR-134-3p
168	hsa-miR-134-5p	5.23611	9.37373	0.809527	0.00438226	12.4307	1	UGUGACUGGUUGACCAGAGGGG	experimental		mature miRNA	standard	MIMAT0000447	hsa-miR-134-5p	hsa-miR-134-5p
169	hsa-miR-135a-3p	3.93598	9.19226	0.957977	0.114477	12.0935	1	UAUAGGGAUUGGAGCCGUGGCG	experimental		mature miRNA	standard	MIMAT0004595	hsa-miR-135a-3p	hsa-miR-135a-3p
170	hsa-miR-135a-5p	0.652239	7.11898	1	1.83453	25.991	0.886115	UAUGGCUUUUUAUUCCUAUGUGA	experimental		mature miRNA	standard	MIMAT0000428	hsa-miR-135a-5p	hsa-miR-135a-5p
171	hsa-miR-135b-3p	0.68684	6.10006	1	1.02392	11.5544	0.779592	AUGUAGGGCUAAAAGCCAUGGG	experimental		mature miRNA	standard	MIMAT0004698	hsa-miR-135b-3p	hsa-miR-135b-3p
172	hsa-miR-135b-5p	2.48501	7.23244	0.832982	1.13974	12.1545	0.880635	UAUGGCUUUUCAUUCCUAUGUGA	experimental		mature miRNA	standard	MIMAT0000758	hsa-miR-135b-5p	hsa-miR-135b-5p
173	hsa-miR-136-3p	1.61459	6.7835	0.983371	0.140021	12.0793	1	CAUCAUCGUCUCAAAUGAGUCU	experimental		mature miRNA	standard	MIMAT0004606	hsa-miR-136-3p	hsa-miR-136-3p
174	hsa-miR-136-5p	0.188127	6.97537	1	0.00262661	11.668	1	ACUCCAUUUGUUUUGAUGAUGGA	experimental		mature miRNA	standard	MIMAT0000448	hsa-miR-136-5p	hsa-miR-136-5p
175	hsa-miR-137	9.00563	8.5653	0.346948	5.77356	17.7695	0.636055	UUAUUGCUUAAGAAUACGCGUAG	experimental		mature miRNA	standard	MIMAT0000429	hsa-miR-137	hsa-miR-137
176	hsa-miR-138-1-3p	1.98111	6.97249	0.91884	1.19511	13.3306	0.90115	GCUACUUCACAACACCAGGGCC	experimental		mature miRNA	standard	MIMAT0004607	hsa-miR-138-1-3p	hsa-miR-138-1-3p
177	hsa-miR-138-2-3p	3.65421	7.25491	0.83978	0.289157	11.8959	0.987235	GCUAUUUCACGACACCAGGGUU	experimental		mature miRNA	standard	MIMAT0004596	hsa-miR-138-2-3p	hsa-miR-138-2-3p
178	hsa-miR-138-5p	0.0380718	6.04865	1	0.0963113	13.1491	1	AGCUGGUGUUGUGAAUCAGGCCG	experimental		mature miRNA	standard	MIMAT0000430	hsa-miR-138-5p	hsa-miR-138-5p
179	hsa-miR-139-3p	3.42697	7.97439	0.919847	2.02887	22.6237	0.866039	UGGAGACGCGGCCCUGUUGGAGU	experimental		mature miRNA	standard	MIMAT0004552	hsa-miR-139-3p	hsa-miR-139-3p
180	hsa-miR-139-5p	7.18442	7.92871	0.486692	3.52591	15.8394	0.714644	UCUACAGUGCACGUGUCUCCAGU	experimental		mature miRNA	standard	MIMAT0000250	hsa-miR-139-5p	hsa-miR-139-5p
181	hsa-miR-140-3p	1108.48	70.5974	1.60173e-56	1833.77	176.987	9.50176e-11	UACCACAGGGUAGAACCACGG	experimental		mature miRNA	standard	MIMAT0004597	hsa-miR-140-3p	hsa-miR-140-3p
182	hsa-miR-140-5p	36.3179	15.3715	0.0121603	32.7484	20.7772	0.138236	CAGUGGUUUUACCCUAUGGUAG	experimental		mature miRNA	standard	MIMAT0000431	hsa-miR-140-5p	hsa-miR-140-5p
183	hsa-miR-141-3p	0.616047	7.33865	1	0.334906	13.091	1	UAACACUGUCUGGUAAAGAUGG	experimental		mature miRNA	standard	MIMAT0000432	hsa-miR-141-3p	hsa-miR-141-3p
184	hsa-miR-141-5p	2.21527	8.07522	0.944612	0.23403	12.2372	1	CAUCUUCCAGUACAGUGUUGGA	experimental		mature miRNA	standard	MIMAT0004598	hsa-miR-141-5p	hsa-miR-141-5p
185	hsa-miR-142-3p	229.905	28.8551	3.57187e-17	193.889	46.6081	6.09908e-05	UGUAGUGUUUCCUACUUUAUGGA	experimental		mature miRNA	standard	MIMAT0000434	hsa-miR-142-3p	hsa-miR-142-3p
186	hsa-miR-142-5p	233.049	36.9282	3.27271e-11	262.806	44.5487	1.7013e-06	CAUAAAGUAGAAAGCACUACU	experimental		mature miRNA	standard	MIMAT0000433	hsa-miR-142-5p	hsa-miR-142-5p
187	hsa-miR-143-3p	6.18444	9.14341	0.634653	2.09212	17.6137	0.873522	UGAGAUGAAGCACUGUAGCUC	experimental		mature miRNA	standard	MIMAT0000435	hsa-miR-143-3p	hsa-miR-143-3p
188	hsa-miR-143-5p	0.0380718	6.7468	1	0.00262661	16.0975	1	GGUGCAGUGCUGCAUCUCUGGU	experimental		mature miRNA	standard	MIMAT0004599	hsa-miR-143-5p	hsa-miR-143-5p
189	hsa-miR-144-3p	0.0380718	6.77269	1	0.00262661	14.7331	1	UACAGUAUAGAUGAUGUACU	experimental		mature miRNA	standard	MIMAT0000436	hsa-miR-144-3p	hsa-miR-144-3p
190	hsa-miR-144-5p	0.0380718	8.32789	1	0.00262661	17.0368	1	GGAUAUCAUCAUAUACUGUAAG	experimental		mature miRNA	standard	MIMAT0004600	hsa-miR-144-5p	hsa-miR-144-5p
191	hsa-miR-145-3p	0.0380718	8.28093	1	0.00262661	13.7891	1	GGAUUCCUGGAAAUACUGUUCU	experimental		mature miRNA	standard	MIMAT0004601	hsa-miR-145-3p	hsa-miR-145-3p
192	hsa-miR-145-5p	7.98356	9.51862	0.49192	7.4546	19.7445	0.701182	GUCCAGUUUUCCCAGGAAUCCCU	experimental		mature miRNA	standard	MIMAT0000437	hsa-miR-145-5p	hsa-miR-145-5p
193	hsa-miR-146a-3p	6.88556	9.5121	0.525034	4.52834	14.4349	0.740285	CCUCUGAAAUUCAGUUCUUCAG	experimental		mature miRNA	standard	MIMAT0004608	hsa-miR-146a-3p	hsa-miR-146a-3p
194	hsa-miR-146a-5p	6036.45	779.89	9.48096e-15	9149.97	934.882	7.45088e-14	UGAGAACUGAAUUCCAUGGGUU	experimental		mature miRNA	standard	MIMAT0000449	hsa-miR-146a-5p	hsa-miR-146a-5p
195	hsa-miR-146b-3p	5.11318	7.09038	0.551689	4.52066	14.7065	0.732653	UGCCCUGUGGACUCAGUUCUGG	experimental		mature miRNA	standard	MIMAT0004766	hsa-miR-146b-3p	hsa-miR-146b-3p
196	hsa-miR-146b-5p	2559.85	143.169	2.63208e-72	3194.25	213.46	1.44783e-51	UGAGAACUGAAUUCCAUAGGCU	experimental		mature miRNA	standard	MIMAT0002809	hsa-miR-146b-5p	hsa-miR-146b-5p
197	hsa-miR-147a	2.57954	7.25041	0.800282	2.80204	13.6699	0.747413	GUGUGUGGAAAUGCUUCUGC	experimental		mature miRNA	standard	MIMAT0000251	hsa-miR-147a	hsa-miR-147a
198	hsa-miR-147b	1.07432	6.08364	1	2.18695	14.4898	0.696507	GUGUGCGGAAAUGCUUCUGCUA	experimental		mature miRNA	standard	MIMAT0004928	hsa-miR-147b	hsa-miR-147b
199	hsa-miR-148a-3p	968.964	81.8707	4.39363e-33	1095.63	182.27	3.20278e-05	UCAGUGCACUACAGAACUUUGU	experimental		mature miRNA	standard	MIMAT0000243	hsa-miR-148a-3p	hsa-miR-148a-3p
200	hsa-miR-148a-5p	17.9946	9.06993	0.0422037	21.756	19.3254	0.383854	AAAGUUCUGAGACACUCCGACU	experimental		mature miRNA	standard	MIMAT0004549	hsa-miR-148a-5p	hsa-miR-148a-5p
201	hsa-miR-148b-3p	379.564	32.2926	1.07134e-33	372.793	66.0177	5.73261e-05	UCAGUGCAUCACAGAACUUUGU	experimental		mature miRNA	standard	MIMAT0000759	hsa-miR-148b-3p	hsa-miR-148b-3p
202	hsa-miR-148b-5p	4.05188	6.97817	0.66504	3.21169	13.9499	0.693212	AAGUUCUGUUAUACACUCAGGC	experimental		mature miRNA	standard	MIMAT0004699	hsa-miR-148b-5p	hsa-miR-148b-5p
203	hsa-miR-149-3p	547.066	61.8345	4.22111e-19	400.124	55.1552	8.01945e-14	AGGGAGGGACGGGGGCUGUGC	experimental		mature miRNA	standard	MIMAT0004609	hsa-miR-149-3p	hsa-miR-149-3p
204	hsa-miR-149-5p	3.62261	5.92386	0.806022	0.510725	14.6453	0.916095	UCUGGCUCCGUGUCUUCACUCCC	experimental		mature miRNA	standard	MIMAT0000450	hsa-miR-149-5p	hsa-miR-149-5p
205	hsa-miR-150-3p	2.90173	6.93059	0.766693	2.1981	13.3615	0.822542	CUGGUACAGGCCUGGGGGACAG	experimental		mature miRNA	standard	MIMAT0004610	hsa-miR-150-3p	hsa-miR-150-3p
206	hsa-miR-150-5p	17.2454	12.0363	0.161443	14.1407	14.0596	0.365794	UCUCCCAACCCUUGUACCAGUG	experimental		mature miRNA	standard	MIMAT0000451	hsa-miR-150-5p	hsa-miR-150-5p
207	hsa-miR-151a-3p	34.1516	13.5493	0.00783932	45.4623	29.8043	0.0730685	CUAGACUGAAGCUCCUUGAGG	experimental		mature miRNA	standard	MIMAT0000757	hsa-miR-151a-3p	hsa-miR-151a-3p
208	hsa-miR-151a-5p	437.683	49.3374	1.74167e-19	498.791	54.3012	4.86448e-13	UCGAGGAGCUCACAGUCUAGU	experimental		mature miRNA	standard	MIMAT0004697	hsa-miR-151a-5p	hsa-miR-151a-5p
209	hsa-miR-151b	434.363	41.7754	1.50786e-26	501.899	72.7814	1.2116e-07	UCGAGGAGCUCACAGUCU	experimental		mature miRNA	standard	MIMAT0010214	hsa-miR-151b	hsa-miR-151b
210	hsa-miR-152-3p	255.136	30.5819	2.31961e-18	324.641	66.4835	0.000335136	UCAGUGCAUGACAGAACUUGG	experimental		mature miRNA	standard	MIMAT0000438	hsa-miR-152-3p	hsa-miR-152-3p
211	hsa-miR-152-5p	0.022936	6.33346	1	0.942122	14.5	0.94225	AGGUUCUGUGAUACACUCCGACU	experimental		mature miRNA	standard	MIMAT0026479	hsa-miR-152-5p	hsa-miR-152-5p
212	hsa-miR-153-3p	0.637211	6.9189	1	2.41239	14.5808	0.819382	UUGCAUAGUCACAAAAGUGAUC	experimental		mature miRNA	standard	MIMAT0000439	hsa-miR-153-3p	hsa-miR-153-3p
213	hsa-miR-153-5p	0.0255213	6.77069	1	0.302645	14.5116	0.922326	UCAUUUUUGUGAUGUUGCAGCU	experimental		mature miRNA	standard	MIMAT0026480	hsa-miR-153-5p	hsa-miR-153-5p
214	hsa-miR-154-3p	1.54193	8.00869	0.923851	2.08325	14.9832	0.790952	AAUCAUACACGGUUGACCUAUU	experimental		mature miRNA	standard	MIMAT0000453	hsa-miR-154-3p	hsa-miR-154-3p
215	hsa-miR-154-5p	5.07047	10.9827	0.752769	4.48057	12.6379	0.59691	UAGGUUAUCCGUGUUGCCUUCG	experimental		mature miRNA	standard	MIMAT0000452	hsa-miR-154-5p	hsa-miR-154-5p
216	hsa-miR-155-3p	0.318666	6.36319	1	2.45394	13.5799	0.651908	CUCCUACAUAUUAGCAUUAACA	experimental		mature miRNA	standard	MIMAT0004658	hsa-miR-155-3p	hsa-miR-155-3p
217	hsa-miR-155-5p	35.7225	13.2619	0.00280937	93.0931	23.4435	0.00623115	UUAAUGCUAAUCGUGAUAGGGGU	experimental		mature miRNA	standard	MIMAT0000646	hsa-miR-155-5p	hsa-miR-155-5p
218	hsa-miR-181a-2-3p	2.0864	7.73384	0.835979	4.81037	14.226	0.495732	ACCACUGACCGUUGACUGUACC	experimental		mature miRNA	standard	MIMAT0004558	hsa-miR-181a-2-3p	hsa-miR-181a-2-3p
219	hsa-miR-181a-3p	4.72909	8.96805	0.798284	1.82648	12.8526	0.997045	ACCAUCGACCGUUGAUUGUACC	experimental		mature miRNA	standard	MIMAT0000270	hsa-miR-181a-3p	hsa-miR-181a-3p
220	hsa-miR-181a-5p	579.638	55.7812	1.34926e-21	625.691	83.1618	6.48501e-11	AACAUUCAACGCUGUCGGUGAGU	experimental		mature miRNA	standard	MIMAT0000256	hsa-miR-181a-5p	hsa-miR-181a-5p
221	hsa-miR-181b-3p	0.632416	7.67675	1	1.19728	14.3958	0.933037	CUCACUGAACAAUGAAUGCAA	experimental		mature miRNA	standard	MIMAT0022692	hsa-miR-181b-3p	hsa-miR-181b-3p
222	hsa-miR-181b-5p	106.315	29.0921	0.000200237	104.613	24.7897	9.74121e-05	AACAUUCAUUGCUGUCGGUGGGU	experimental		mature miRNA	standard	MIMAT0000257	hsa-miR-181b-5p	hsa-miR-181b-5p
223	hsa-miR-181c-3p	2.07436	7.09291	1	0.062568	14.3025	1	AACCAUCGACCGUUGAGUGGAC	experimental		mature miRNA	standard	MIMAT0004559	hsa-miR-181c-3p	hsa-miR-181c-3p
224	hsa-miR-181c-5p	86.8084	22.5616	9.41065e-06	105.362	21.3309	1.07268e-06	AACAUUCAACCUGUCGGUGAGU	experimental		mature miRNA	standard	MIMAT0000258	hsa-miR-181c-5p	hsa-miR-181c-5p
225	hsa-miR-181d-3p	0.021657	7.10639	1	1.6541	14.1196	0.848766	CCACCGGGGGAUGAAUGUCAC	experimental		mature miRNA	standard	MIMAT0026608	hsa-miR-181d-3p	hsa-miR-181d-3p
226	hsa-miR-181d-5p	77.7056	17.4616	8.54236e-06	84.048	22.6604	0.000951726	AACAUUCAUUGUUGUCGGUGGGU	experimental		mature miRNA	standard	MIMAT0002821	hsa-miR-181d-5p	hsa-miR-181d-5p
227	hsa-miR-182-3p	2.10183	8.0068	1	0.235276	11.7163	1	UGGUUCUAGACUUGCCAACUA	experimental		mature miRNA	standard	MIMAT0000260	hsa-miR-182-3p	hsa-miR-182-3p
228	hsa-miR-182-5p	2.3054	6.89605	0.883909	1.7217	13.824	0.854178	UUUGGCAAUGGUAGAACUCACACU	experimental		mature miRNA	standard	MIMAT0000259	hsa-miR-182-5p	hsa-miR-182-5p
229	hsa-miR-183-3p	2.56391	8.29034	0.93807	1.44342	14.1652	0.878537	GUGAAUUACCGAAGGGCCAUAA	experimental		mature miRNA	standard	MIMAT0004560	hsa-miR-183-3p	hsa-miR-183-3p
230	hsa-miR-183-5p	1.48593	6.52224	0.952627	1.81125	13.1081	0.846868	UAUGGCACUGGUAGAAUUCACU	experimental		mature miRNA	standard	MIMAT0000261	hsa-miR-183-5p	hsa-miR-183-5p
231	hsa-miR-184	4.8829	6.6133	0.702971	1.03475	11.6092	0.984429	UGGACGGAGAACUGAUAAGGGU	experimental		mature miRNA	standard	MIMAT0000454	hsa-miR-184	hsa-miR-184
232	hsa-miR-185-3p	2.32784	6.90761	0.855294	1.03335	13.5726	0.927784	AGGGGCUGGCUUUCCUCUGGUC	experimental		mature miRNA	standard	MIMAT0004611	hsa-miR-185-3p	hsa-miR-185-3p
233	hsa-miR-185-5p	91.5921	18.4608	5.69928e-08	124.864	31.7342	0.000866265	UGGAGAGAAAGGCAGUUCCUGA	experimental		mature miRNA	standard	MIMAT0000455	hsa-miR-185-5p	hsa-miR-185-5p
234	hsa-miR-186-3p	6.88189	10.424	0.740008	0.520895	11.4841	1	GCCCAAAGGUGAAUUUUUUGGG	experimental		mature miRNA	standard	MIMAT0004612	hsa-miR-186-3p	hsa-miR-186-3p
235	hsa-miR-186-5p	144.005	24.5456	4.65024e-10	175.269	36.0004	1.88574e-05	CAAAGAAUUCUCCUUUUGGGCU	experimental		mature miRNA	standard	MIMAT0000456	hsa-miR-186-5p	hsa-miR-186-5p
236	hsa-miR-187-3p	2.16771	6.78775	0.847268	1.52247	13.0662	0.877569	UCGUGUCUUGUGUUGCAGCCGG	experimental		mature miRNA	standard	MIMAT0000262	hsa-miR-187-3p	hsa-miR-187-3p
237	hsa-miR-187-5p	6.35286	6.55324	0.430088	3.38737	14.6533	0.93542	GGCUACAACACAGGACCCGGGC	experimental		mature miRNA	standard	MIMAT0004561	hsa-miR-187-5p	hsa-miR-187-5p
238	hsa-miR-188-3p	2.25447	7.1421	1	0.00262661	12.1865	1	CUCCCACAUGCAGGGUUUGCA	experimental		mature miRNA	standard	MIMAT0004613	hsa-miR-188-3p	hsa-miR-188-3p
239	hsa-miR-188-5p	5.97972	8.29978	0.647133	1.5632	14.5502	0.869715	CAUCCCUUGCAUGGUGGAGGG	experimental		mature miRNA	standard	MIMAT0000457	hsa-miR-188-5p	hsa-miR-188-5p
240	hsa-miR-190a-3p	0.0380718	6.90743	1	0.00262661	12.5929	1	CUAUAUAUCAAACAUAUUCCU	experimental		mature miRNA	standard	MIMAT0026482	hsa-miR-190a-3p	hsa-miR-190a-3p
241	hsa-miR-190a-5p	4.30041	10.5807	1	0.00262661	12.4527	1	UGAUAUGUUUGAUAUAUUAGGU	experimental		mature miRNA	standard	MIMAT0000458	hsa-miR-190a-5p	hsa-miR-190a-5p
242	hsa-miR-190b	0.0970679	5.90388	1	0.00262661	12.9963	1	UGAUAUGUUUGAUAUUGGGUU	experimental		mature miRNA	standard	MIMAT0004929	hsa-miR-190b	hsa-miR-190b
243	hsa-miR-191-3p	2.99453	7.54683	0.82478	0.0039559	11.4052	1	GCUGCGCUUGGAUUUCGUCCCC	experimental		mature miRNA	standard	MIMAT0001618	hsa-miR-191-3p	hsa-miR-191-3p
244	hsa-miR-191-5p	4188.39	271.331	2.81053e-50	5193.6	506.563	2.0685e-17	CAACGGAAUCCCAAAAGCAGCUG	experimental		mature miRNA	standard	MIMAT0000440	hsa-miR-191-5p	hsa-miR-191-5p
245	hsa-miR-192-3p	2.18693	6.92455	0.813039	3.47259	22.1715	0.885662	CUGCCAAUUCCAUAGGUCACAG	experimental		mature miRNA	standard	MIMAT0004543	hsa-miR-192-3p	hsa-miR-192-3p
246	hsa-miR-192-5p	11.0759	7.68529	0.210129	6.18865	18.281	0.703916	CUGACCUAUGAAUUGACAGCC	experimental		mature miRNA	standard	MIMAT0000222	hsa-miR-192-5p	hsa-miR-192-5p
247	hsa-miR-193a-3p	9.24886	9.03144	0.371738	3.61107	12.1338	0.817301	AACUGGCCUACAAAGUCCCAGU	experimental		mature miRNA	standard	MIMAT0000459	hsa-miR-193a-3p	hsa-miR-193a-3p
248	hsa-miR-193a-5p	23.0905	11.2931	0.0344447	15.1554	15.0882	0.32642	UGGGUCUUUGCGGGCGAGAUGA	experimental		mature miRNA	standard	MIMAT0004614	hsa-miR-193a-5p	hsa-miR-193a-5p
249	hsa-miR-193b-3p	4.02119	6.00894	0.639366	3.74921	12.9837	0.729057	AACUGGCCCUCAAAGUCCCGCU	experimental		mature miRNA	standard	MIMAT0002819	hsa-miR-193b-3p	hsa-miR-193b-3p
250	hsa-miR-193b-5p	4.59133	7.46522	0.707666	0.792584	14.9051	0.957703	CGGGGUUUUGAGGGCGAGAUGA	experimental		mature miRNA	standard	MIMAT0004767	hsa-miR-193b-5p	hsa-miR-193b-5p
251	hsa-miR-194-3p	0.571109	5.37449	1	0.0115231	13.0689	1	CCAGUGGGGCUGCUGUUAUCUG	experimental		mature miRNA	standard	MIMAT0004671	hsa-miR-194-3p	hsa-miR-194-3p
252	hsa-miR-194-5p	6.81784	7.94171	0.573864	0.164895	11.9681	0.974291	UGUAACAGCAACUCCAUGUGGA	experimental		mature miRNA	standard	MIMAT0000460	hsa-miR-194-5p	hsa-miR-194-5p
253	hsa-miR-195-3p	7.65085	7.32415	0.652183	2.32986	15.6195	0.86274	CCAAUAUUGGCUGUGCUGCUCC	experimental		mature miRNA	standard	MIMAT0004615	hsa-miR-195-3p	hsa-miR-195-3p
254	hsa-miR-195-5p	237.95	29.1636	1.57342e-18	141.166	29.2448	9.72324e-06	UAGCAGCACAGAAAUAUUGGC	experimental		mature miRNA	standard	MIMAT0000461	hsa-miR-195-5p	hsa-miR-195-5p
255	hsa-miR-196a-3p	4.94298	7.84326	0.753472	0.0042781	12.6569	1	CGGCAACAAGAAACUGCCUGAG	experimental		mature miRNA	standard	MIMAT0004562	hsa-miR-196a-3p	hsa-miR-196a-3p
256	hsa-miR-196a-5p	6.5717	7.97106	0.711839	0.00447898	13.842	1	UAGGUAGUUUCAUGUUGUUGGG	experimental		mature miRNA	standard	MIMAT0000226	hsa-miR-196a-5p	hsa-miR-196a-5p
257	hsa-miR-196b-3p	3.97897	7.25456	0.823626	0.00404838	12.2217	1	UCGACAGCACGACACUGCCUUC	experimental		mature miRNA	standard	MIMAT0009201	hsa-miR-196b-3p	hsa-miR-196b-3p
258	hsa-miR-196b-5p	11.0586	11.0686	0.575279	0.208997	16.3028	1	UAGGUAGUUUCCUGUUGUUGGG	experimental		mature miRNA	standard	MIMAT0001080	hsa-miR-196b-5p	hsa-miR-196b-5p
259	hsa-miR-197-3p	79.2397	21.3054	0.000217515	66.4368	21.1719	0.00624955	UUCACCACCUUCUCCACCCAGC	experimental		mature miRNA	standard	MIMAT0000227	hsa-miR-197-3p	hsa-miR-197-3p
260	hsa-miR-197-5p	11.5953	7.62291	0.429189	0.761342	13.064	1	CGGGUAGAGAGGGCAGUGGGAGG	experimental		mature miRNA	standard	MIMAT0022691	hsa-miR-197-5p	hsa-miR-197-5p
261	hsa-miR-198	0.721554	6.27727	1	0.00262661	13.8022	1	GGUCCAGAGGGGAGAUAGGUUC	experimental		mature miRNA	standard	MIMAT0000228	hsa-miR-198	hsa-miR-198
262	hsa-miR-199a-3p	451.549	49.9876	5.32857e-19	441.861	72.768	1.64028e-07	ACAGUAGUCUGCACAUUGGUUA	experimental		mature miRNA	standard	MIMAT0000232,MIMAT0004563	hsa-miR-199a-3p	hsa-miR-199a-3p, hsa-miR-199b-3p
263	hsa-miR-199a-5p	86.5853	18.3117	2.3912e-07	66.6394	20.6973	0.00778227	CCCAGUGUUCAGACUACCUGUUC	experimental		mature miRNA	standard	MIMAT0000231	hsa-miR-199a-5p	hsa-miR-199a-5p
264	hsa-miR-199b-5p	37.2433	13.822	0.00422218	22.8178	15.2911	0.164074	CCCAGUGUUUAGACUAUCUGUUC	experimental		mature miRNA	standard	MIMAT0000263	hsa-miR-199b-5p	hsa-miR-199b-5p
265	hsa-miR-200a-3p	4.21092	6.13287	0.690879	0.208981	12.3301	1	UAACACUGUCUGGUAACGAUGU	experimental		mature miRNA	standard	MIMAT0000682	hsa-miR-200a-3p	hsa-miR-200a-3p
266	hsa-miR-200a-5p	0.0380718	5.50332	1	0.102527	12.4754	1	CAUCUUACCGGACAGUGCUGGA	experimental		mature miRNA	standard	MIMAT0001620	hsa-miR-200a-5p	hsa-miR-200a-5p
267	hsa-miR-200b-3p	21.6084	8.96275	0.180559	1.64294	12.1309	0.898987	UAAUACUGCCUGGUAAUGAUGA	experimental		mature miRNA	standard	MIMAT0000318	hsa-miR-200b-3p	hsa-miR-200b-3p
268	hsa-miR-200b-5p	3.23383	7.33766	0.792035	0.885171	13.9611	1	CAUCUUACUGGGCAGCAUUGGA	experimental		mature miRNA	standard	MIMAT0004571	hsa-miR-200b-5p	hsa-miR-200b-5p
269	hsa-miR-200c-3p	11.3583	9.10507	0.253098	4.30522	14.317	0.706	UAAUACUGCCGGGUAAUGAUGGA	experimental		mature miRNA	standard	MIMAT0000617	hsa-miR-200c-3p	hsa-miR-200c-3p
270	hsa-miR-200c-5p	4.61281	6.97094	0.688242	0.699525	13.6295	1	CGUCUUACCCAGCAGUGUUUGG	experimental		mature miRNA	standard	MIMAT0004657	hsa-miR-200c-5p	hsa-miR-200c-5p
271	hsa-miR-202-3p	6.63682	7.5405	0.637057	0.00442815	11.7737	1	AGAGGUAUAGGGCAUGGGAA	experimental		mature miRNA	standard	MIMAT0002811	hsa-miR-202-3p	hsa-miR-202-3p
272	hsa-miR-202-5p	18.0496	9.56201	0.0524346	11.9366	15.8759	0.433836	UUCCUAUGCAUAUACUUCUUUG	experimental		mature miRNA	standard	MIMAT0002810	hsa-miR-202-5p	hsa-miR-202-5p
273	hsa-miR-203a	7.89217	8.66304	0.629143	0.1071	11.6425	1	GUGAAAUGUUUAGGACCACUAG	experimental		mature miRNA	standard	MIMAT0000264	hsa-miR-203a	hsa-miR-203a
274	hsa-miR-203b-3p	0.72233	6.40537	1	0.382463	12.1749	1	UUGAACUGUUAAGAACCACUGGA	experimental		mature miRNA	standard	MIMAT0019814	hsa-miR-203b-3p	hsa-miR-203b-3p
275	hsa-miR-203b-5p	0.0494781	5.95211	1	0.00262661	13.7455	1	UAGUGGUCCUAAACAUUUCACA	experimental		mature miRNA	standard	MIMAT0019813	hsa-miR-203b-5p	hsa-miR-203b-5p
276	hsa-miR-204-3p	2.41065	7.06873	0.841271	1.25844	14.3022	0.91003	GCUGGGAAGGCAAAGGGACGU	experimental		mature miRNA	standard	MIMAT0022693	hsa-miR-204-3p	hsa-miR-204-3p
277	hsa-miR-204-5p	0.449692	5.89355	1	0.00262661	13.4881	1	UUCCCUUUGUCAUCCUAUGCCU	experimental		mature miRNA	standard	MIMAT0000265	hsa-miR-204-5p	hsa-miR-204-5p
278	hsa-miR-205-3p	0.0380718	6.22047	1	0.00262661	15.6526	1	GAUUUCAGUGGAGUGAAGUUC	experimental		mature miRNA	standard	MIMAT0009197	hsa-miR-205-3p	hsa-miR-205-3p
279	hsa-miR-205-5p	1.01714	6.99189	1	0.370283	14.2004	0.953844	UCCUUCAUUCCACCGGAGUCUG	experimental		mature miRNA	standard	MIMAT0000266	hsa-miR-205-5p	hsa-miR-205-5p
280	hsa-miR-206	1.48055	6.50868	0.857019	4.63116	16.5778	0.738191	UGGAAUGUAAGGAAGUGUGUGG	experimental		mature miRNA	standard	MIMAT0000462	hsa-miR-206	hsa-miR-206
281	hsa-miR-208a-3p	0.0380718	6.50351	1	0.00262661	13.4366	1	AUAAGACGAGCAAAAAGCUUGU	experimental		mature miRNA	standard	MIMAT0000241	hsa-miR-208a-3p	hsa-miR-208a-3p
282	hsa-miR-208a-5p	11.7126	9.86335	0.308354	2.03435	15.0502	0.866505	GAGCUUUUGGCCCGGGUUAUAC	experimental		mature miRNA	standard	MIMAT0026474	hsa-miR-208a-5p	hsa-miR-208a-5p
283	hsa-miR-208b-3p	0.0380718	7.06021	1	0.00262661	16.2467	1	AUAAGACGAACAAAAGGUUUGU	experimental		mature miRNA	standard	MIMAT0004960	hsa-miR-208b-3p	hsa-miR-208b-3p
284	hsa-miR-208b-5p	0.0249632	6.93663	1	0.572093	13.6175	0.961161	AAGCUUUUUGCUCGAAUUAUGU	experimental		mature miRNA	standard	MIMAT0026722	hsa-miR-208b-5p	hsa-miR-208b-5p
285	hsa-miR-210-3p	15.26	10.4392	0.163874	7.54022	16.1103	0.619339	CUGUGCGUGUGACAGCGGCUGA	experimental		mature miRNA	standard	MIMAT0000267	hsa-miR-210-3p	hsa-miR-210-3p
286	hsa-miR-210-5p	5.11431	9.07677	0.627316	2.27733	16.3811	0.904145	AGCCCCUGCCCACCGCACACUG	experimental		mature miRNA	standard	MIMAT0026475	hsa-miR-210-5p	hsa-miR-210-5p
287	hsa-miR-211-3p	6.78392	7.08911	0.378701	4.28613	13.3639	0.731883	GCAGGGACAGCAAAGGGGUGC	experimental		mature miRNA	standard	MIMAT0022694	hsa-miR-211-3p	hsa-miR-211-3p
288	hsa-miR-211-5p	1.82073	6.97955	0.797811	2.13086	14.148	0.790035	UUCCCUUUGUCAUCCUUCGCCU	experimental		mature miRNA	standard	MIMAT0000268	hsa-miR-211-5p	hsa-miR-211-5p
289	hsa-miR-212-3p	10.0515	7.74833	0.219317	53.7235	33.8782	0.174493	UAACAGUCUCCAGUCACGGCC	experimental		mature miRNA	standard	MIMAT0000269	hsa-miR-212-3p	hsa-miR-212-3p
290	hsa-miR-212-5p	2.99854	7.28635	0.736774	2.82081	12.0359	0.720023	ACCUUGGCUCUAGACUGCUUACU	experimental		mature miRNA	standard	MIMAT0022695	hsa-miR-212-5p	hsa-miR-212-5p
291	hsa-miR-214-3p	154.982	62.5092	0.0123054	284.823	98.7012	0.0147029	ACAGCAGGCACAGACAGGCAGU	experimental		mature miRNA	standard	MIMAT0000271	hsa-miR-214-3p	hsa-miR-214-3p
292	hsa-miR-214-5p	0.418569	6.97875	0.975042	1.85357	13.0084	0.778111	UGCCUGUCUACACUUGCUGUGC	experimental		mature miRNA	standard	MIMAT0004564	hsa-miR-214-5p	hsa-miR-214-5p
293	hsa-miR-215-3p	4.1032	9.97674	0.906989	0.534981	14.6737	0.936249	UCUGUCAUUUCUUUAGGCCAAUA	experimental		mature miRNA	standard	MIMAT0026476	hsa-miR-215-3p	hsa-miR-215-3p
294	hsa-miR-215-5p	2.855	6.9849	0.807404	1.7414	15.3427	0.81381	AUGACCUAUGAAUUGACAGAC	experimental		mature miRNA	standard	MIMAT0000272	hsa-miR-215-5p	hsa-miR-215-5p
295	hsa-miR-216a-3p	1.13258	7.23618	1	1.08692	15.1753	0.855628	UCACAGUGGUCUCUGGGAUUAU	experimental		mature miRNA	standard	MIMAT0022844	hsa-miR-216a-3p	hsa-miR-216a-3p
296	hsa-miR-216a-5p	0.0227158	6.72678	1	1.07122	13.5164	0.860407	UAAUCUCAGCUGGCAACUGUGA	experimental		mature miRNA	standard	MIMAT0000273	hsa-miR-216a-5p	hsa-miR-216a-5p
297	hsa-miR-216b-3p	8.50103	15.7282	0.741094	1.56027	13.9826	0.808248	ACACACUUACCCGUAGAGAUUCUA	experimental		mature miRNA	standard	MIMAT0026721	hsa-miR-216b-3p	hsa-miR-216b-3p
298	hsa-miR-216b-5p	0.0380718	7.0869	1	0.204219	13.1914	1	AAAUCUCUGCAGGCAAAUGUGA	experimental		mature miRNA	standard	MIMAT0004959	hsa-miR-216b-5p	hsa-miR-216b-5p
299	hsa-miR-217	1.34909	6.59302	1	1.85351	24.0068	0.869914	UACUGCAUCAGGAACUGAUUGGA	experimental		mature miRNA	standard	MIMAT0000274	hsa-miR-217	hsa-miR-217
300	hsa-miR-218-1-3p	0.771537	5.97476	1	1.11038	11.8074	0.775068	AUGGUUCCGUCAAGCACCAUGG	experimental		mature miRNA	standard	MIMAT0004565	hsa-miR-218-1-3p	hsa-miR-218-1-3p
301	hsa-miR-218-2-3p	0.889416	6.85693	0.864861	1.63401	13.3096	0.788307	CAUGGUUCUGUCAAGCACCGCG	experimental		mature miRNA	standard	MIMAT0004566	hsa-miR-218-2-3p	hsa-miR-218-2-3p
302	hsa-miR-218-5p	2.44963	6.32053	0.659849	5.86395	14.2649	0.53856	UUGUGCUUGAUCUAACCAUGU	experimental		mature miRNA	standard	MIMAT0000275	hsa-miR-218-5p	hsa-miR-218-5p
303	hsa-miR-219a-1-3p	0.633846	6.77023	0.95116	5.9954	24.7355	0.666152	AGAGUUGAGUCUGGACGUCCCG	experimental		mature miRNA	standard	MIMAT0004567	hsa-miR-219a-1-3p	hsa-miR-219a-1-3p
304	hsa-miR-219a-2-3p	0.535898	5.56436	0.848972	2.32968	12.5917	0.704949	AGAAUUGUGGCUGGACAUCUGU	experimental		mature miRNA	standard	MIMAT0004675	hsa-miR-219a-2-3p	hsa-miR-219a-2-3p
305	hsa-miR-219a-5p	3.758	9.49745	0.91883	2.25219	13.7744	0.697083	UGAUUGUCCAAACGCAAUUCU	experimental		mature miRNA	standard	MIMAT0000276	hsa-miR-219a-5p	hsa-miR-219a-5p
306	hsa-miR-219b-3p	1.92205	7.69836	0.797757	5.13197	13.6979	0.546048	AGAAUUGCGUUUGGACAAUCAGU	experimental		mature miRNA	standard	MIMAT0019748	hsa-miR-219b-3p	hsa-miR-219b-3p
307	hsa-miR-219b-5p	9.58475	17.059	0.610646	4.20307	15.8427	0.602218	AGAUGUCCAGCCACAAUUCUCG	experimental		mature miRNA	standard	MIMAT0019747	hsa-miR-219b-5p	hsa-miR-219b-5p
308	hsa-miR-221-3p	1104.4	207.78	2.15846e-08	1178.7	172.872	1.69394e-08	AGCUACAUUGUCUGCUGGGUUUC	experimental		mature miRNA	standard	MIMAT0000278	hsa-miR-221-3p	hsa-miR-221-3p
309	hsa-miR-221-5p	23.2139	10.6918	0.0183703	35.579	28.8116	0.285135	ACCUGGCAUACAAUGUAGAUUU	experimental		mature miRNA	standard	MIMAT0004568	hsa-miR-221-5p	hsa-miR-221-5p
310	hsa-miR-222-3p	1065.4	157.729	7.53208e-12	1147.1	164.135	3.32599e-10	AGCUACAUCUGGCUACUGGGU	experimental		mature miRNA	standard	MIMAT0000279	hsa-miR-222-3p	hsa-miR-222-3p
311	hsa-miR-222-5p	9.94433	8.56625	0.248536	10.9147	15.8199	0.344173	CUCAGUAGCCAGUGUAGAUCCU	experimental		mature miRNA	standard	MIMAT0004569	hsa-miR-222-5p	hsa-miR-222-5p
312	hsa-miR-223-3p	929.79	107.137	3.33073e-19	810.072	100.946	6.78037e-12	UGUCAGUUUGUCAAAUACCCCA	experimental		mature miRNA	standard	MIMAT0000280	hsa-miR-223-3p	hsa-miR-223-3p
313	hsa-miR-223-5p	4.35433	7.2471	0.481967	9.61613	16.3113	0.425677	CGUGUAUUUGACAAGCUGAGUU	experimental		mature miRNA	standard	MIMAT0004570	hsa-miR-223-5p	hsa-miR-223-5p
314	hsa-miR-224-3p	1.05476	8.11857	1	0.324648	14.0845	1	AAAAUGGUGCCCUAGUGACUACA	experimental		mature miRNA	standard	MIMAT0009198	hsa-miR-224-3p	hsa-miR-224-3p
315	hsa-miR-224-5p	1.18808	7.02202	1	0.993899	17.9706	0.947495	CAAGUCACUAGUGGUUCCGUU	experimental		mature miRNA	standard	MIMAT0000281	hsa-miR-224-5p	hsa-miR-224-5p
316	hsa-miR-296-3p	0.0380718	6.49571	1	0.0379115	12.9653	1	GAGGGUUGGGUGGAGGCUCUCC	experimental		mature miRNA	standard	MIMAT0004679	hsa-miR-296-3p	hsa-miR-296-3p
317	hsa-miR-296-5p	8.44787	9.01234	0.424868	4.56108	13.0752	0.680249	AGGGCCCCCCCUCAAUCCUGU	experimental		mature miRNA	standard	MIMAT0000690	hsa-miR-296-5p	hsa-miR-296-5p
318	hsa-miR-297	2.48566	7.47002	0.946125	4.0362	13.6013	0.749273	AUGUAUGUGUGCAUGUGCAUG	experimental		mature miRNA	standard	MIMAT0004450	hsa-miR-297	hsa-miR-297
319	hsa-miR-298	2.03327	7.9572	1	1.0812	13.3404	0.972279	AGCAGAAGCAGGGAGGUUCUCCCA	experimental		mature miRNA	standard	MIMAT0004901	hsa-miR-298	hsa-miR-298
320	hsa-miR-299-3p	2.48749	6.71116	0.808089	2.55161	14.1793	0.799685	UAUGUGGGAUGGUAAACCGCUU	experimental		mature miRNA	standard	MIMAT0000687	hsa-miR-299-3p	hsa-miR-299-3p
321	hsa-miR-299-5p	7.75415	10.4034	0.660612	0.321966	13.8455	0.958349	UGGUUUACCGUCCCACAUACAU	experimental		mature miRNA	standard	MIMAT0002890	hsa-miR-299-5p	hsa-miR-299-5p
322	hsa-miR-300	0.0707453	6.46443	1	0.00383217	15.8596	1	UAUACAAGGGCAGACUCUCUCU	experimental		mature miRNA	standard	MIMAT0004903	hsa-miR-300	hsa-miR-300
323	hsa-miR-301a-3p	7.08715	7.6702	0.684513	0.0043961	13.6579	1	CAGUGCAAUAGUAUUGUCAAAGC	experimental		mature miRNA	standard	MIMAT0000688	hsa-miR-301a-3p	hsa-miR-301a-3p
324	hsa-miR-301a-5p	0.0380718	8.10963	1	0.0493214	13.4874	1	GCUCUGACUUUAUUGCACUACU	experimental		mature miRNA	standard	MIMAT0022696	hsa-miR-301a-5p	hsa-miR-301a-5p
325	hsa-miR-301b	2.49039	7.76316	0.834079	2.96722	18.3363	0.807731	CAGUGCAAUGAUAUUGUCAAAGC	experimental		mature miRNA	standard	MIMAT0004958	hsa-miR-301b	hsa-miR-301b
326	hsa-miR-302a-3p	0.0380718	7.03253	1	0.0682323	15.6022	1	UAAGUGCUUCCAUGUUUUGGUGA	experimental		mature miRNA	standard	MIMAT0000684	hsa-miR-302a-3p	hsa-miR-302a-3p
327	hsa-miR-302a-5p	0.0380718	6.78814	1	0.00262661	14.0359	1	ACUUAAACGUGGAUGUACUUGCU	experimental		mature miRNA	standard	MIMAT0000683	hsa-miR-302a-5p	hsa-miR-302a-5p
328	hsa-miR-302b-3p	0.0380718	6.47571	1	0.00262661	13.0504	1	UAAGUGCUUCCAUGUUUUAGUAG	experimental		mature miRNA	standard	MIMAT0000715	hsa-miR-302b-3p	hsa-miR-302b-3p
329	hsa-miR-302b-5p	0.0380718	8.0122	1	0.00262661	14.5576	1	ACUUUAACAUGGAAGUGCUUUC	experimental		mature miRNA	standard	MIMAT0000714	hsa-miR-302b-5p	hsa-miR-302b-5p
330	hsa-miR-302c-3p	0.0380718	6.53269	1	0.00262661	16.6823	1	UAAGUGCUUCCAUGUUUCAGUGG	experimental		mature miRNA	standard	MIMAT0000717	hsa-miR-302c-3p	hsa-miR-302c-3p
331	hsa-miR-302c-5p	7.36244	15.0785	1	0.147449	12.9137	1	UUUAACAUGGGGGUACCUGCUG	experimental		mature miRNA	standard	MIMAT0000716	hsa-miR-302c-5p	hsa-miR-302c-5p
332	hsa-miR-302d-3p	0.0380718	7.72225	1	0.00262661	16.1706	1	UAAGUGCUUCCAUGUUUGAGUGU	experimental		mature miRNA	standard	MIMAT0000718	hsa-miR-302d-3p	hsa-miR-302d-3p
333	hsa-miR-302d-5p	0.0380718	6.39585	1	0.00262661	11.1782	1	ACUUUAACAUGGAGGCACUUGC	experimental		mature miRNA	standard	MIMAT0004685	hsa-miR-302d-5p	hsa-miR-302d-5p
334	hsa-miR-302e	0.0380718	6.40827	1	0.00262661	12.9853	1	UAAGUGCUUCCAUGCUU	experimental		mature miRNA	standard	MIMAT0005931	hsa-miR-302e	hsa-miR-302e
335	hsa-miR-302f	0.0380718	7.12796	1	0.00262661	13.409	1	UAAUUGCUUCCAUGUUU	experimental		mature miRNA	standard	MIMAT0005932	hsa-miR-302f	hsa-miR-302f
336	hsa-miR-320a	78.754	20.3215	2.3853e-05	88.51	27.3727	0.00480981	AAAAGCUGGGUUGAGAGGGCGA	experimental		mature miRNA	standard	MIMAT0000510	hsa-miR-320a	hsa-miR-320a
337	hsa-miR-320b	57.0132	17.3863	0.000360884	58.0347	22.2553	0.0282975	AAAAGCUGGGUUGAGAGGGCAA	experimental		mature miRNA	standard	MIMAT0005792	hsa-miR-320b	hsa-miR-320b
338	hsa-miR-320c	60.1767	19.3992	0.00108211	65.1558	22.5766	0.00811299	AAAAGCUGGGUUGAGAGGGU	experimental		mature miRNA	standard	MIMAT0005793	hsa-miR-320c	hsa-miR-320c
339	hsa-miR-320d	64.1896	16.0812	1.50786e-05	41.1082	31.6529	0.23291	AAAAGCUGGGUUGAGAGGA	experimental		mature miRNA	standard	MIMAT0006764	hsa-miR-320d	hsa-miR-320d
340	hsa-miR-320e	53.4503	16.6213	0.000684098	51.0056	17.9566	0.00761995	AAAGCUGGGUUGAGAAGG	experimental		mature miRNA	standard	MIMAT0015072	hsa-miR-320e	hsa-miR-320e
341	hsa-miR-323a-3p	3.3309	8.1365	0.829151	0.0040259	12.6808	1	CACAUUACACGGUCGACCUCU	experimental		mature miRNA	standard	MIMAT0000755	hsa-miR-323a-3p	hsa-miR-323a-3p
342	hsa-miR-323a-5p	4.14954	9.26525	0.841149	0.00324421	12.583	1	AGGUGGUCCGUGGCGCGUUCGC	experimental		mature miRNA	standard	MIMAT0004696	hsa-miR-323a-5p	hsa-miR-323a-5p
343	hsa-miR-323b-3p	13.9064	10.2454	0.415696	0.389124	11.7766	0.959038	CCCAAUACACGGUCGACCUCUU	experimental		mature miRNA	standard	MIMAT0015050	hsa-miR-323b-3p	hsa-miR-323b-3p
344	hsa-miR-323b-5p	3.05938	7.52051	0.759299	0.64836	12.8841	0.946345	AGGUUGUCCGUGGUGAGUUCGCA	experimental		mature miRNA	standard	MIMAT0001630	hsa-miR-323b-5p	hsa-miR-323b-5p
345	hsa-miR-324-3p	14.844	9.60605	0.14738	7.92075	14.5471	0.527776	ACUGCCCCAGGUGCUGCUGG	experimental		mature miRNA	standard	MIMAT0000762	hsa-miR-324-3p	hsa-miR-324-3p
346	hsa-miR-324-5p	50.4812	16.741	0.00108527	43.473	18.804	0.0237621	CGCAUCCCCUAGGGCAUUGGUGU	experimental		mature miRNA	standard	MIMAT0000761	hsa-miR-324-5p	hsa-miR-324-5p
347	hsa-miR-325	0.0380718	6.39031	1	0.0363038	12.8589	1	CCUAGUAGGUGUCCAGUAAGUGU	experimental		mature miRNA	standard	MIMAT0000771	hsa-miR-325	hsa-miR-325
348	hsa-miR-326	2.51622	7.96374	0.970129	0.150371	14.1306	0.912302	CCUCUGGGCCCUUCCUCCAG	experimental		mature miRNA	standard	MIMAT0000756	hsa-miR-326	hsa-miR-326
349	hsa-miR-328-3p	11.1694	8.47222	0.491879	0.91074	14.9736	0.86926	CUGGCCCUCUCUGCCCUUCCGU	experimental		mature miRNA	standard	MIMAT0000752	hsa-miR-328-3p	hsa-miR-328-3p
350	hsa-miR-328-5p	239.71	31.2186	1.33836e-14	172.344	33.0611	5.15858e-07	GGGGGGGCAGGAGGGGCUCAGGG	experimental		mature miRNA	standard	MIMAT0026486	hsa-miR-328-5p	hsa-miR-328-5p
351	hsa-miR-329-3p	6.17587	8.77776	0.733885	0.919594	13.4964	0.8931	AACACACCUGGUUAACCUCUUU	experimental		mature miRNA	standard	MIMAT0001629	hsa-miR-329-3p	hsa-miR-329-3p
352	hsa-miR-329-5p	6.15478	6.92085	0.459778	5.1342	18.4489	0.677057	GAGGUUUUCUGGGUUUCUGUUUC	experimental		mature miRNA	standard	MIMAT0026555	hsa-miR-329-5p	hsa-miR-329-5p
353	hsa-miR-330-3p	17.3606	22.0576	0.468667	1.25755	12.9131	0.856193	GCAAAGCACACGGCCUGCAGAGA	experimental		mature miRNA	standard	MIMAT0000751	hsa-miR-330-3p	hsa-miR-330-3p
354	hsa-miR-330-5p	0.0380718	6.65755	1	0.288118	13.9773	0.939196	UCUCUGGGCCUGUGUCUUAGGC	experimental		mature miRNA	standard	MIMAT0004693	hsa-miR-330-5p	hsa-miR-330-5p
355	hsa-miR-331-3p	38.1774	12.5459	0.00147916	20.904	17.6397	0.271525	GCCCCUGGGCCUAUCCUAGAA	experimental		mature miRNA	standard	MIMAT0000760	hsa-miR-331-3p	hsa-miR-331-3p
356	hsa-miR-331-5p	2.88054	9.16912	1	0.0641332	14.9368	1	CUAGGUAUGGUCCCAGGGAUCC	experimental		mature miRNA	standard	MIMAT0004700	hsa-miR-331-5p	hsa-miR-331-5p
357	hsa-miR-335-3p	0.960788	8.43052	0.998958	0.220636	13.7849	1	UUUUUCAUUAUUGCUCCUGACC	experimental		mature miRNA	standard	MIMAT0004703	hsa-miR-335-3p	hsa-miR-335-3p
358	hsa-miR-335-5p	6.57984	8.87111	0.468234	4.86919	16.682	0.712754	UCAAGAGCAAUAACGAAAAAUGU	experimental		mature miRNA	standard	MIMAT0000765	hsa-miR-335-5p	hsa-miR-335-5p
359	hsa-miR-337-3p	9.16512	8.94615	0.562473	0.673544	15.3794	1	CUCCUAUAUGAUGCCUUUCUUC	experimental		mature miRNA	standard	MIMAT0000754	hsa-miR-337-3p	hsa-miR-337-3p
360	hsa-miR-337-5p	0.631539	6.86063	1	0.00262661	13.0662	1	GAACGGCUUCAUACAGGAGUU	experimental		mature miRNA	standard	MIMAT0004695	hsa-miR-337-5p	hsa-miR-337-5p
361	hsa-miR-338-3p	13.8526	8.56132	0.155354	3.51757	15.3898	0.909671	UCCAGCAUCAGUGAUUUUGUUG	experimental		mature miRNA	standard	MIMAT0000763	hsa-miR-338-3p	hsa-miR-338-3p
362	hsa-miR-338-5p	27.083	12.214	0.0218967	26.1584	17.778	0.129541	AACAAUAUCCUGGUGCUGAGUG	experimental		mature miRNA	standard	MIMAT0004701	hsa-miR-338-5p	hsa-miR-338-5p
363	hsa-miR-339-3p	10.1295	8.98488	0.310778	4.36012	13.4134	0.649761	UGAGCGCCUCGACGACAGAGCCG	experimental		mature miRNA	standard	MIMAT0004702	hsa-miR-339-3p	hsa-miR-339-3p
364	hsa-miR-339-5p	11.1325	8.22154	0.220753	2.70469	13.0818	0.755575	UCCCUGUCCUCCAGGAGCUCACG	experimental		mature miRNA	standard	MIMAT0000764	hsa-miR-339-5p	hsa-miR-339-5p
365	hsa-miR-340-3p	17.4724	9.58835	0.0763235	10.9968	15.7875	0.451796	UCCGUCUCAGUUACUUUAUAGC	experimental		mature miRNA	standard	MIMAT0000750	hsa-miR-340-3p	hsa-miR-340-3p
366	hsa-miR-340-5p	76.3088	22.7482	0.000338143	108.956	25.3072	0.000232298	UUAUAAAGCAAUGAGACUGAUU	experimental		mature miRNA	standard	MIMAT0004692	hsa-miR-340-5p	hsa-miR-340-5p
367	hsa-miR-342-3p	254.234	45.5089	9.20854e-09	258.505	41.5886	2.99169e-07	UCUCACACAGAAAUCGCACCCGU	experimental		mature miRNA	standard	MIMAT0000753	hsa-miR-342-3p	hsa-miR-342-3p
368	hsa-miR-342-5p	8.38726	7.89646	0.324637	5.59975	14.2932	0.638973	AGGGGUGCUAUCUGUGAUUGA	experimental		mature miRNA	standard	MIMAT0004694	hsa-miR-342-5p	hsa-miR-342-5p
369	hsa-miR-345-3p	1.85386	6.92594	0.877399	1.36242	13.3359	0.871662	GCCCUGAACGAGGGGUCUGGAG	experimental		mature miRNA	standard	MIMAT0022698	hsa-miR-345-3p	hsa-miR-345-3p
370	hsa-miR-345-5p	19.2914	12.2089	0.092816	16.7608	15.1834	0.320121	GCUGACUCCUAGUCCAGGGCUC	experimental		mature miRNA	standard	MIMAT0000772	hsa-miR-345-5p	hsa-miR-345-5p
371	hsa-miR-346	4.86912	7.39423	0.614496	0.500338	14.0443	1	UGUCUGCCCGCAUGCCUGCCUCU	experimental		mature miRNA	standard	MIMAT0000773	hsa-miR-346	hsa-miR-346
372	hsa-miR-361-3p	13.2688	8.47783	0.112625	17.8048	15.4264	0.219561	UCCCCCAGGUGUGAUUCUGAUUU	experimental		mature miRNA	standard	MIMAT0004682	hsa-miR-361-3p	hsa-miR-361-3p
373	hsa-miR-361-5p	127.643	18.6729	2.0123e-13	153.084	28.6686	2.14068e-06	UUAUCAGAAUCUCCAGGGGUAC	experimental		mature miRNA	standard	MIMAT0000703	hsa-miR-361-5p	hsa-miR-361-5p
374	hsa-miR-362-3p	11.6615	10.4261	0.396742	8.1596	15.7219	0.676766	AACACACCUAUUCAAGGAUUCA	experimental		mature miRNA	standard	MIMAT0004683	hsa-miR-362-3p	hsa-miR-362-3p
375	hsa-miR-362-5p	67.5451	18.7472	0.00010177	85.2121	21.3118	0.00524026	AAUCCUUGGAACCUAGGUGUGAGU	experimental		mature miRNA	standard	MIMAT0000705	hsa-miR-362-5p	hsa-miR-362-5p
376	hsa-miR-363-3p	3.39843	7.70469	1	1.17618	15.3875	0.945996	AAUUGCACGGUAUCCAUCUGUA	experimental		mature miRNA	standard	MIMAT0000707	hsa-miR-363-3p	hsa-miR-363-3p
377	hsa-miR-363-5p	4.7929	8.26156	0.794214	2.5562	14.9042	0.892454	CGGGUGGAUCACGAUGCAAUUU	experimental		mature miRNA	standard	MIMAT0003385	hsa-miR-363-5p	hsa-miR-363-5p
378	hsa-miR-365a-3p	30.6234	11.9355	0.00750249	22.4701	20.6951	0.274327	UAAUGCCCCUAAAAAUCCUUAU	experimental		mature miRNA	standard	MIMAT0000710,MIMAT0022834	hsa-miR-365a-3p	hsa-miR-365a-3p, hsa-miR-365b-3p
379	hsa-miR-365a-5p	12.4702	8.78618	0.500298	0.395864	12.4335	1	AGGGACUUUUGGGGGCAGAUGUG	experimental		mature miRNA	standard	MIMAT0009199	hsa-miR-365a-5p	hsa-miR-365a-5p
380	hsa-miR-365b-5p	0.41524	8.34245	1	0.164104	13.7013	0.99079	AGGGACUUUCAGGGGCAGCUGU	experimental		mature miRNA	standard	MIMAT0022833	hsa-miR-365b-5p	hsa-miR-365b-5p
381	hsa-miR-367-3p	1.33736	6.00206	1	0.201245	12.6147	0.985912	AAUUGCACUUUAGCAAUGGUGA	experimental		mature miRNA	standard	MIMAT0000719	hsa-miR-367-3p	hsa-miR-367-3p
382	hsa-miR-367-5p	1.04602	6.47363	1	1.54439	13.8086	0.829163	ACUGUUGCUAAUAUGCAACUCU	experimental		mature miRNA	standard	MIMAT0004686	hsa-miR-367-5p	hsa-miR-367-5p
383	hsa-miR-369-3p	8.62871	8.47139	0.463999	2.61022	14.209	0.724968	AAUAAUACAUGGUUGAUCUUU	experimental		mature miRNA	standard	MIMAT0000721	hsa-miR-369-3p	hsa-miR-369-3p
384	hsa-miR-369-5p	4.62052	7.30961	0.677066	0.935494	13.2887	0.897498	AGAUCGACCGUGUUAUAUUCGC	experimental		mature miRNA	standard	MIMAT0001621	hsa-miR-369-5p	hsa-miR-369-5p
385	hsa-miR-370-3p	1.39373	6.45326	1	0.00262661	14.7134	1	GCCUGCUGGGGUGGAACCUGGU	experimental		mature miRNA	standard	MIMAT0000722	hsa-miR-370-3p	hsa-miR-370-3p
386	hsa-miR-370-5p	0.0380718	7.15781	1	0.00262661	12.8594	1	CAGGUCACGUCUCUGCAGUUAC	experimental		mature miRNA	standard	MIMAT0026483	hsa-miR-370-5p	hsa-miR-370-5p
387	hsa-miR-371a-3p	0.0380718	7.89225	1	0.00262661	12.4885	1	AAGUGCCGCCAUCUUUUGAGUGU	experimental		mature miRNA	standard	MIMAT0000723	hsa-miR-371a-3p	hsa-miR-371a-3p
388	hsa-miR-371a-5p	0.0507108	7.47628	1	0.721219	13.5592	0.959664	ACUCAAACUGUGGGGGCACU	experimental		mature miRNA	standard	MIMAT0004687	hsa-miR-371a-5p	hsa-miR-371a-5p
389	hsa-miR-371b-3p	5.08901	8.43225	0.80921	0.442647	15.6983	0.935687	AAGUGCCCCCACAGUUUGAGUGC	experimental		mature miRNA	standard	MIMAT0019893	hsa-miR-371b-3p	hsa-miR-371b-3p
390	hsa-miR-371b-5p	54.2808	19.1383	0.00270356	42.2935	21.0907	0.104521	ACUCAAAAGAUGGCGGCACUUU	experimental		mature miRNA	standard	MIMAT0019892	hsa-miR-371b-5p	hsa-miR-371b-5p
391	hsa-miR-372-3p	0.0242967	4.8467	1	0.53158	15.7956	0.939968	AAAGUGCUGCGACAUUUGAGCGU	experimental		mature miRNA	standard	MIMAT0000724	hsa-miR-372-3p	hsa-miR-372-3p
392	hsa-miR-372-5p	0.0380718	8.00293	1	0.172481	13.9773	1	CCUCAAAUGUGGAGCACUAUUCU	experimental		mature miRNA	standard	MIMAT0026484	hsa-miR-372-5p	hsa-miR-372-5p
393	hsa-miR-373-3p	0.0380718	6.74762	1	0.00262661	14.8121	1	GAAGUGCUUCGAUUUUGGGGUGU	experimental		mature miRNA	standard	MIMAT0000726	hsa-miR-373-3p	hsa-miR-373-3p
394	hsa-miR-373-5p	1.20306	9.2956	1	1.25848	16.5609	0.87199	ACUCAAAAUGGGGGCGCUUUCC	experimental		mature miRNA	standard	MIMAT0000725	hsa-miR-373-5p	hsa-miR-373-5p
395	hsa-miR-374a-3p	0.0380718	8.29849	1	0.00262661	13.079	1	CUUAUCAGAUUGUAUUGUAAUU	experimental		mature miRNA	standard	MIMAT0004688	hsa-miR-374a-3p	hsa-miR-374a-3p
396	hsa-miR-374a-5p	304.131	40.8344	1.15291e-14	237.805	60.1071	3.65888e-07	UUAUAAUACAACCUGAUAAGUG	experimental		mature miRNA	standard	MIMAT0000727	hsa-miR-374a-5p	hsa-miR-374a-5p
397	hsa-miR-374b-3p	2.77796	9.94292	1	0.00262661	14.1462	1	CUUAGCAGGUUGUAUUAUCAUU	experimental		mature miRNA	standard	MIMAT0004956	hsa-miR-374b-3p	hsa-miR-374b-3p
398	hsa-miR-374b-5p	655.606	56.3822	3.14479e-32	641.304	65.5391	7.47021e-10	AUAUAAUACAACCUGCUAAGUG	experimental		mature miRNA	standard	MIMAT0004955	hsa-miR-374b-5p	hsa-miR-374b-5p
399	hsa-miR-374c-3p	4.74185	8.68729	0.729031	2.59461	13.4996	0.77892	CACUUAGCAGGUUGUAUUAUAU	experimental		mature miRNA	standard	MIMAT0022735	hsa-miR-374c-3p	hsa-miR-374c-3p
400	hsa-miR-374c-5p	394.041	38.4421	1.19741e-25	355.969	52.4525	9.52849e-10	AUAAUACAACCUGCUAAGUGCU	experimental		mature miRNA	standard	MIMAT0018443	hsa-miR-374c-5p	hsa-miR-374c-5p
401	hsa-miR-375	3.14281	9.20763	1	0.0575092	13.916	0.938929	UUUGUUCGUUCGGCUCGCGUGA	experimental		mature miRNA	standard	MIMAT0000728	hsa-miR-375	hsa-miR-375
402	hsa-miR-376a-2-5p	2.4628	7.61088	0.903634	0.923454	14.3381	0.857184	GGUAGAUUUUCCUUCUAUGGU	experimental		mature miRNA	standard	MIMAT0022928	hsa-miR-376a-2-5p	hsa-miR-376a-2-5p
403	hsa-miR-376a-3p	7.79185	8.04765	0.396749	6.58691	16.6889	0.601438	AUCAUAGAGGAAAAUCCACGU	experimental		mature miRNA	standard	MIMAT0000729	hsa-miR-376a-3p	hsa-miR-376a-3p
404	hsa-miR-376a-5p	1.26766	7.32157	0.921771	1.37749	14.1562	0.865747	GUAGAUUCUCCUUCUAUGAGUA	experimental		mature miRNA	standard	MIMAT0003386	hsa-miR-376a-5p	hsa-miR-376a-5p
405	hsa-miR-376b-3p	2.58593	7.36042	0.811636	2.66158	12.2819	0.722149	AUCAUAGAGGAAAAUCCAUGUU	experimental		mature miRNA	standard	MIMAT0002172	hsa-miR-376b-3p	hsa-miR-376b-3p
406	hsa-miR-376b-5p	2.61004	7.70115	0.853411	2.10041	13.9464	0.713894	CGUGGAUAUUCCUUCUAUGUUU	experimental		mature miRNA	standard	MIMAT0022923	hsa-miR-376b-5p	hsa-miR-376b-5p
407	hsa-miR-376c-3p	53.7526	13.2415	7.59342e-06	90.4623	24.1906	0.014053	AACAUAGAGGAAAUUCCACGU	experimental		mature miRNA	standard	MIMAT0000720	hsa-miR-376c-3p	hsa-miR-376c-3p
408	hsa-miR-376c-5p	2.78304	6.58165	0.749881	5.5251	19.2894	0.697521	GGUGGAUAUUCCUUCUAUGUU	experimental		mature miRNA	standard	MIMAT0022861	hsa-miR-376c-5p	hsa-miR-376c-5p
409	hsa-miR-377-3p	4.97173	9.22874	0.692387	5.41419	16.1753	0.63965	AUCACACAAAGGCAACUUUUGU	experimental		mature miRNA	standard	MIMAT0000730	hsa-miR-377-3p	hsa-miR-377-3p
410	hsa-miR-377-5p	1.43472	6.82367	0.896181	2.4943	11.6819	0.709212	AGAGGUUGCCCUUGGUGAAUUC	experimental		mature miRNA	standard	MIMAT0004689	hsa-miR-377-5p	hsa-miR-377-5p
411	hsa-miR-378a-3p	433.831	37.6237	3.18232e-32	506.205	55.381	6.54996e-07	ACUGGACUUGGAGUCAGAAGGC	experimental		mature miRNA	standard	MIMAT0000732	hsa-miR-378a-3p	hsa-miR-378a-3p
412	hsa-miR-378a-5p	16.0264	9.89877	0.110698	15.8548	13.9352	0.307574	CUCCUGACUCCAGGUCCUGUGU	experimental		mature miRNA	standard	MIMAT0000731	hsa-miR-378a-5p	hsa-miR-378a-5p
413	hsa-miR-378b	17.0366	9.60316	0.0959604	8.89522	17.2311	0.505995	ACUGGACUUGGAGGCAGAA	experimental		mature miRNA	standard	MIMAT0014999	hsa-miR-378b	hsa-miR-378b
414	hsa-miR-378c	52.9517	24.6801	0.0218887	66.0739	20.8179	0.0131704	ACUGGACUUGGAGUCAGAAGAGUGG	experimental		mature miRNA	standard	MIMAT0016847	hsa-miR-378c	hsa-miR-378c
415	hsa-miR-378d	107.62	24.305	1.63859e-06	151.516	26.7199	0.00132813	ACUGGACUUGGAGUCAGAAA	experimental		mature miRNA	standard	MIMAT0018926	hsa-miR-378d	hsa-miR-378d
416	hsa-miR-378e	229.714	36.6432	6.01628e-11	338.72	50.721	7.153e-05	ACUGGACUUGGAGUCAGGA	experimental		mature miRNA	standard	MIMAT0018927	hsa-miR-378e	hsa-miR-378e
417	hsa-miR-378f	59.0677	17.9248	0.000278626	89.1732	25.6291	0.0105931	ACUGGACUUGGAGCCAGAAG	experimental		mature miRNA	standard	MIMAT0018932	hsa-miR-378f	hsa-miR-378f
418	hsa-miR-378g	105.047	17.6766	5.94604e-11	168.983	34.1698	0.000341098	ACUGGGCUUGGAGUCAGAAG	experimental		mature miRNA	standard	MIMAT0018937	hsa-miR-378g	hsa-miR-378g
419	hsa-miR-378h	5.89853	8.20658	0.573861	4.43331	16.5353	0.666641	ACUGGACUUGGUGUCAGAUGG	experimental		mature miRNA	standard	MIMAT0018984	hsa-miR-378h	hsa-miR-378h
420	hsa-miR-378i	89.3423	21.7709	1.04848e-05	147.75	34.9489	0.00703583	ACUGGACUAGGAGUCAGAAGG	experimental		mature miRNA	standard	MIMAT0019074	hsa-miR-378i	hsa-miR-378i
421	hsa-miR-378j	13.5342	12.0117	0.275307	10.597	18.668	0.441459	ACUGGAUUUGGAGCCAGAA	experimental		mature miRNA	standard	MIMAT0024612	hsa-miR-378j	hsa-miR-378j
422	hsa-miR-379-3p	0.0230643	8.00959	1	1.17739	16.5383	0.805561	UAUGUAACAUGGUCCACUAACU	experimental		mature miRNA	standard	MIMAT0004690	hsa-miR-379-3p	hsa-miR-379-3p
423	hsa-miR-379-5p	6.5007	7.96243	0.464084	13.8801	20.1116	0.492401	UGGUAGACUAUGGAACGUAGG	experimental		mature miRNA	standard	MIMAT0000733	hsa-miR-379-5p	hsa-miR-379-5p
424	hsa-miR-380-3p	1.66103	9.21968	1	0.519777	13.7768	0.884787	UAUGUAAUAUGGUCCACAUCUU	experimental		mature miRNA	standard	MIMAT0000735	hsa-miR-380-3p	hsa-miR-380-3p
425	hsa-miR-380-5p	0.825337	7.75879	1	1.57904	13.4508	0.80249	UGGUUGACCAUAGAACAUGCGC	experimental		mature miRNA	standard	MIMAT0000734	hsa-miR-380-5p	hsa-miR-380-5p
426	hsa-miR-381-3p	0.0205152	7.25201	1	3.03492	16.16	0.7493	UAUACAAGGGCAAGCUCUCUGU	experimental		mature miRNA	standard	MIMAT0000736	hsa-miR-381-3p	hsa-miR-381-3p
427	hsa-miR-381-5p	20.7466	9.77627	0.0334233	9.07581	14.3232	0.540443	AGCGAGGUUGCCCUUUGUAUAU	experimental		mature miRNA	standard	MIMAT0022862	hsa-miR-381-5p	hsa-miR-381-5p
428	hsa-miR-382-3p	2.44081	7.31858	1	5.35999	15.0912	0.478054	AAUCAUUCACGGACAACACUU	experimental		mature miRNA	standard	MIMAT0022697	hsa-miR-382-3p	hsa-miR-382-3p
429	hsa-miR-382-5p	2.26322	6.90427	0.803541	11.0733	16.8393	0.435145	GAAGUUGUUCGUGGUGGAUUCG	experimental		mature miRNA	standard	MIMAT0000737	hsa-miR-382-5p	hsa-miR-382-5p
430	hsa-miR-383-3p	1.75935	6.41027	0.898171	7.27655	17.9382	0.535108	ACAGCACUGCCUGGUCAGA	experimental		mature miRNA	standard	MIMAT0026485	hsa-miR-383-3p	hsa-miR-383-3p
431	hsa-miR-383-5p	4.14671	8.12124	0.679895	9.77829	14.4086	0.521623	AGAUCAGAAGGUGAUUGUGGCU	experimental		mature miRNA	standard	MIMAT0000738	hsa-miR-383-5p	hsa-miR-383-5p
432	hsa-miR-384	2.13867	7.04455	0.95696	4.39031	14.6734	0.629647	AUUCCUAGAAAUUGUUCAUA	experimental		mature miRNA	standard	MIMAT0001075	hsa-miR-384	hsa-miR-384
433	hsa-miR-409-3p	6.46538	9.63366	0.570545	4.15248	15.6556	0.701396	GAAUGUUGCUCGGUGAACCCCU	experimental		mature miRNA	standard	MIMAT0001639	hsa-miR-409-3p	hsa-miR-409-3p
434	hsa-miR-409-5p	7.18778	9.08939	0.655501	0.294123	15.3601	1	AGGUUACCCGAGCAACUUUGCAU	experimental		mature miRNA	standard	MIMAT0001638	hsa-miR-409-5p	hsa-miR-409-5p
435	hsa-miR-410-3p	3.28376	5.20129	0.640254	1.70528	13.6069	0.840277	AAUAUAACACAGAUGGCCUGU	experimental		mature miRNA	standard	MIMAT0002171	hsa-miR-410-3p	hsa-miR-410-3p
436	hsa-miR-410-5p	4.11426	7.60361	0.762383	0.16678	12.4514	1	AGGUUGUCUGUGAUGAGUUCG	experimental		mature miRNA	standard	MIMAT0026558	hsa-miR-410-5p	hsa-miR-410-5p
437	hsa-miR-411-3p	5.7454	6.74686	0.455839	4.1953	13.9954	0.767712	UAUGUAACACGGUCCACUAACC	experimental		mature miRNA	standard	MIMAT0004813	hsa-miR-411-3p	hsa-miR-411-3p
438	hsa-miR-411-5p	1.89857	5.81592	0.759378	2.61575	13.8578	0.833856	UAGUAGACCGUAUAGCGUACG	experimental		mature miRNA	standard	MIMAT0003329	hsa-miR-411-5p	hsa-miR-411-5p
439	hsa-miR-412-3p	0.640859	6.42067	1	0.00262661	13.0933	1	ACUUCACCUGGUCCACUAGCCGU	experimental		mature miRNA	standard	MIMAT0002170	hsa-miR-412-3p	hsa-miR-412-3p
440	hsa-miR-412-5p	3.24295	7.98581	0.832301	0.00336859	11.4458	1	UGGUCGACCAGUUGGAAAGUAAU	experimental		mature miRNA	standard	MIMAT0026557	hsa-miR-412-5p	hsa-miR-412-5p
441	hsa-miR-421	17.3465	11.8587	0.172441	4.95322	13.2463	0.622413	AUCAACAGACAUUAAUUGGGCGC	experimental		mature miRNA	standard	MIMAT0003339	hsa-miR-421	hsa-miR-421
442	hsa-miR-422a	343.089	32.7832	3.01559e-27	362.405	55.6818	6.02697e-07	ACUGGACUUAGGGUCAGAAGGC	experimental		mature miRNA	standard	MIMAT0001339	hsa-miR-422a	hsa-miR-422a
443	hsa-miR-423-3p	8.81292	7.74037	0.295367	3.71635	15.0099	0.728279	AGCUCGGUCUGAGGCCCCUCAGU	experimental		mature miRNA	standard	MIMAT0001340	hsa-miR-423-3p	hsa-miR-423-3p
444	hsa-miR-423-5p	362.61	38.6686	1.05629e-21	450.36	58.1003	1.04954e-08	UGAGGGGCAGAGAGCGAGACUUU	experimental		mature miRNA	standard	MIMAT0004748	hsa-miR-423-5p	hsa-miR-423-5p
445	hsa-miR-424-3p	1.27753	6.21245	1	0.0037462	12.2631	1	CAAAACGUGAGGCGCUGCUAU	experimental		mature miRNA	standard	MIMAT0004749	hsa-miR-424-3p	hsa-miR-424-3p
446	hsa-miR-424-5p	3.40075	6.97297	0.830984	0.00408562	13.2333	1	CAGCAGCAAUUCAUGUUUUGAA	experimental		mature miRNA	standard	MIMAT0001341	hsa-miR-424-5p	hsa-miR-424-5p
447	hsa-miR-425-3p	22.5958	12.1473	0.0718961	6.9407	12.9053	0.57341	AUCGGGAAUGUCGUGUCCGCCC	experimental		mature miRNA	standard	MIMAT0001343	hsa-miR-425-3p	hsa-miR-425-3p
448	hsa-miR-425-5p	206.334	28.0392	1.468e-14	302.892	41.3268	6.89311e-08	AAUGACACGAUCACUCCCGUUGA	experimental		mature miRNA	standard	MIMAT0003393	hsa-miR-425-5p	hsa-miR-425-5p
449	hsa-miR-429	1.84005	5.88827	0.951009	0.366195	13.2363	1	UAAUACUGUCUGGUAAAACCGU	experimental		mature miRNA	standard	MIMAT0001536	hsa-miR-429	hsa-miR-429
450	hsa-miR-431-3p	0.140537	6.82659	1	0.226415	13.9076	1	CAGGUCGUCUUGCAGGGCUUCU	experimental		mature miRNA	standard	MIMAT0004757	hsa-miR-431-3p	hsa-miR-431-3p
451	hsa-miR-431-5p	0.603161	6.67013	0.977659	0.993973	12.2379	0.825513	UGUCUUGCAGGCCGUCAUGCA	experimental		mature miRNA	standard	MIMAT0001625	hsa-miR-431-5p	hsa-miR-431-5p
452	hsa-miR-432-3p	6.94713	9.93097	0.466197	11.3436	15.5689	0.331771	CUGGAUGGCUCCUCCAUGUCU	experimental		mature miRNA	standard	MIMAT0002815	hsa-miR-432-3p	hsa-miR-432-3p
453	hsa-miR-432-5p	3.835	8.11293	0.658581	6.32954	15.4417	0.520544	UCUUGGAGUAGGUCAUUGGGUGG	experimental		mature miRNA	standard	MIMAT0002814	hsa-miR-432-5p	hsa-miR-432-5p
454	hsa-miR-433-3p	1.02827	7.32866	1	0.770122	18.3031	1	AUCAUGAUGGGCUCCUCGGUGU	experimental		mature miRNA	standard	MIMAT0001627	hsa-miR-433-3p	hsa-miR-433-3p
455	hsa-miR-433-5p	3.39663	9.07582	1	0.188897	15.8176	1	UACGGUGAGCCUGUCAUUAUUC	experimental		mature miRNA	standard	MIMAT0026554	hsa-miR-433-5p	hsa-miR-433-5p
456	hsa-miR-448	1.17246	6.6312	1	1.28289	13.2691	0.77176	UUGCAUAUGUAGGAUGUCCCAU	experimental		mature miRNA	standard	MIMAT0001532	hsa-miR-448	hsa-miR-448
457	hsa-miR-449a	3.182	7.01717	0.921732	0.215897	12.7602	0.96121	UGGCAGUGUAUUGUUAGCUGGU	experimental		mature miRNA	standard	MIMAT0001541	hsa-miR-449a	hsa-miR-449a
458	hsa-miR-449b-3p	3.93531	8.44684	0.830444	0.0121654	12.2142	0.971308	CAGCCACAACUACCCUGCCACU	experimental		mature miRNA	standard	MIMAT0009203	hsa-miR-449b-3p	hsa-miR-449b-3p
459	hsa-miR-449b-5p	3.20235	7.5534	0.889212	0.00421518	11.1076	1	AGGCAGUGUAUUGUUAGCUGGC	experimental		mature miRNA	standard	MIMAT0003327	hsa-miR-449b-5p	hsa-miR-449b-5p
460	hsa-miR-449c-3p	2.23866	8.14939	0.886777	1.02954	15.0605	0.837851	UUGCUAGUUGCACUCCUCUCUGU	experimental		mature miRNA	standard	MIMAT0013771	hsa-miR-449c-3p	hsa-miR-449c-3p
461	hsa-miR-449c-5p	6.76136	14.4566	0.902973	0.763397	14.2576	0.908853	UAGGCAGUGUAUUGCUAGCGGCUGU	experimental		mature miRNA	standard	MIMAT0010251	hsa-miR-449c-5p	hsa-miR-449c-5p
462	hsa-miR-450a-1-3p	0.0240901	6.38468	1	1.42493	13.47	0.701414	AUUGGGAACAUUUUGCAUGUAU	experimental		mature miRNA	standard	MIMAT0022700	hsa-miR-450a-1-3p	hsa-miR-450a-1-3p
463	hsa-miR-450a-2-3p	0.956591	6.65469	1	2.99534	13.5954	0.649194	AUUGGGGACAUUUUGCAUUCAU	experimental		mature miRNA	standard	MIMAT0031074	hsa-miR-450a-2-3p	hsa-miR-450a-2-3p
464	hsa-miR-450a-5p	14.6501	23.8341	0.604955	3.81318	14.3816	0.660891	UUUUGCGAUGUGUUCCUAAUAU	experimental		mature miRNA	standard	MIMAT0001545	hsa-miR-450a-5p	hsa-miR-450a-5p
465	hsa-miR-450b-3p	0.176985	7.60428	1	3.49053	14.4509	0.663135	UUGGGAUCAUUUUGCAUCCAUA	experimental		mature miRNA	standard	MIMAT0004910	hsa-miR-450b-3p	hsa-miR-450b-3p
466	hsa-miR-450b-5p	2.23132	9.06115	0.875366	4.44346	15.6486	0.584425	UUUUGCAAUAUGUUCCUGAAUA	experimental		mature miRNA	standard	MIMAT0004909	hsa-miR-450b-5p	hsa-miR-450b-5p
467	hsa-miR-451a	5.59504	8.35228	0.566822	12.4403	21.7725	0.4322	AAACCGUUACCAUUACUGAGUU	experimental		mature miRNA	standard	MIMAT0001631	hsa-miR-451a	hsa-miR-451a
468	hsa-miR-451b	3.31969	7.99936	0.737733	7.08569	15.9714	0.593757	UAGCAAGAGAACCAUUACCAUU	experimental		mature miRNA	standard	MIMAT0019840	hsa-miR-451b	hsa-miR-451b
469	hsa-miR-452-3p	0.923549	7.19054	1	3.49598	12.3872	0.570714	CUCAUCUGCAAAGAAGUAAGUG	experimental		mature miRNA	standard	MIMAT0001636	hsa-miR-452-3p	hsa-miR-452-3p
470	hsa-miR-452-5p	0.0380718	8.44769	1	0.0536738	13.3963	1	AACUGUUUGCAGAGGAAACUGA	experimental		mature miRNA	standard	MIMAT0001635	hsa-miR-452-5p	hsa-miR-452-5p
471	hsa-miR-454-3p	150.602	30.5929	1.05058e-07	139.188	34.2186	0.000498778	UAGUGCAAUAUUGCUUAUAGGGU	experimental		mature miRNA	standard	MIMAT0003885	hsa-miR-454-3p	hsa-miR-454-3p
472	hsa-miR-454-5p	6.76717	8.54877	0.603002	0.00454519	12.9711	1	ACCCUAUCAAUAUUGUCUCUGC	experimental		mature miRNA	standard	MIMAT0003884	hsa-miR-454-5p	hsa-miR-454-5p
473	hsa-miR-455-3p	10.768	9.45865	0.244935	4.97593	13.8366	0.652342	GCAGUCCAUGGGCAUAUACAC	experimental		mature miRNA	standard	MIMAT0004784	hsa-miR-455-3p	hsa-miR-455-3p
474	hsa-miR-455-5p	1.69213	5.9513	0.875205	0.0715056	11.3471	1	UAUGUGCCUUUGGACUACAUCG	experimental		mature miRNA	standard	MIMAT0003150	hsa-miR-455-5p	hsa-miR-455-5p
475	hsa-miR-466	349.773	64.8291	3.40585e-08	319.425	49.3203	5.91461e-09	AUACACAUACACGCAACACACAU	experimental		mature miRNA	standard	MIMAT0015002	hsa-miR-466	hsa-miR-466
476	hsa-miR-483-3p	3.83575	7.28806	0.696585	1.26941	11.9528	0.874111	UCACUCCUCUCCUCCCGUCUU	experimental		mature miRNA	standard	MIMAT0002173	hsa-miR-483-3p	hsa-miR-483-3p
477	hsa-miR-483-5p	28.2785	9.45584	0.00195247	32.6351	15.8846	0.0853433	AAGACGGGAGGAAAGAAGGGAG	experimental		mature miRNA	standard	MIMAT0004761	hsa-miR-483-5p	hsa-miR-483-5p
478	hsa-miR-484	26.5795	11.2272	0.0103391	29.0895	14.6503	0.098673	UCAGGCUCAGUCCCCUCCCGAU	experimental		mature miRNA	standard	MIMAT0002174	hsa-miR-484	hsa-miR-484
479	hsa-miR-485-3p	3.06698	8.22834	0.728571	1.39865	14.6611	0.906313	GUCAUACACGGCUCUCCUCUCU	experimental		mature miRNA	standard	MIMAT0002176	hsa-miR-485-3p	hsa-miR-485-3p
480	hsa-miR-485-5p	0.296041	6.0989	0.889866	1.72412	12.9192	0.784326	AGAGGCUGGCCGUGAUGAAUUC	experimental		mature miRNA	standard	MIMAT0002175	hsa-miR-485-5p	hsa-miR-485-5p
481	hsa-miR-486-3p	49.5893	24.8839	0.0300036	88.0752	28.7657	0.00437023	CGGGGCAGCUCAGUACAGGAU	experimental		mature miRNA	standard	MIMAT0004762	hsa-miR-486-3p	hsa-miR-486-3p
482	hsa-miR-486-5p	4.85624	6.92638	0.678442	0.0736993	12.5237	1	UCCUGUACUGAGCUGCCCCGAG	experimental		mature miRNA	standard	MIMAT0002177	hsa-miR-486-5p	hsa-miR-486-5p
483	hsa-miR-487a-3p	5.23243	9.16289	0.744446	0.00438402	14.9682	1	AAUCAUACAGGGACAUCCAGUU	experimental		mature miRNA	standard	MIMAT0002178	hsa-miR-487a-3p	hsa-miR-487a-3p
484	hsa-miR-487a-5p	0.854384	7.42624	1	0.00262661	15.0853	1	GUGGUUAUCCCUGCUGUGUUCG	experimental		mature miRNA	standard	MIMAT0026559	hsa-miR-487a-5p	hsa-miR-487a-5p
485	hsa-miR-487b-3p	7.93715	8.87262	0.393477	4.27655	18.303	0.751404	AAUCGUACAGGGUCAUCCACUU	experimental		mature miRNA	standard	MIMAT0003180	hsa-miR-487b-3p	hsa-miR-487b-3p
486	hsa-miR-487b-5p	0.0380718	7.58091	1	0.00262661	13.7839	1	GUGGUUAUCCCUGUCCUGUUCG	experimental		mature miRNA	standard	MIMAT0026614	hsa-miR-487b-5p	hsa-miR-487b-5p
487	hsa-miR-488-3p	0.0380718	6.72192	1	0.00262661	15.7347	1	UUGAAAGGCUAUUUCUUGGUC	experimental		mature miRNA	standard	MIMAT0004763	hsa-miR-488-3p	hsa-miR-488-3p
488	hsa-miR-488-5p	0.0380718	6.69113	1	0.00262661	18.3828	1	CCCAGAUAAUGGCACUCUCAA	experimental		mature miRNA	standard	MIMAT0002804	hsa-miR-488-5p	hsa-miR-488-5p
489	hsa-miR-489-3p	0.0380718	8.23954	1	0.00262661	14.8901	1	GUGACAUCACAUAUACGGCAGC	experimental		mature miRNA	standard	MIMAT0002805	hsa-miR-489-3p	hsa-miR-489-3p
490	hsa-miR-489-5p	0.0380718	6.37337	1	0.00262661	14.5306	1	GGUCGUAUGUGUGACGCCAUUU	experimental		mature miRNA	standard	MIMAT0026605	hsa-miR-489-5p	hsa-miR-489-5p
491	hsa-miR-490-3p	0.0380718	7.58117	1	0.00262661	13.5124	1	CAACCUGGAGGACUCCAUGCUG	experimental		mature miRNA	standard	MIMAT0002806	hsa-miR-490-3p	hsa-miR-490-3p
492	hsa-miR-490-5p	0.0380718	5.7804	1	0.00262661	14.5599	1	CCAUGGAUCUCCAGGUGGGU	experimental		mature miRNA	standard	MIMAT0004764	hsa-miR-490-5p	hsa-miR-490-5p
493	hsa-miR-491-3p	0.128835	7.03838	0.976487	0.00262661	14.9464	1	CUUAUGCAAGAUUCCCUUCUAC	experimental		mature miRNA	standard	MIMAT0004765	hsa-miR-491-3p	hsa-miR-491-3p
494	hsa-miR-491-5p	2.74844	6.83074	0.763323	2.1056	20.8792	0.930993	AGUGGGGAACCCUUCCAUGAGG	experimental		mature miRNA	standard	MIMAT0002807	hsa-miR-491-5p	hsa-miR-491-5p
495	hsa-miR-492	0.0380718	6.85392	1	0.180049	14.8397	1	AGGACCUGCGGGACAAGAUUCUU	experimental		mature miRNA	standard	MIMAT0002812	hsa-miR-492	hsa-miR-492
496	hsa-miR-493-3p	2.65512	8.11084	0.824955	0.812084	13.1442	0.981278	UGAAGGUCUACUGUGUGCCAGG	experimental		mature miRNA	standard	MIMAT0003161	hsa-miR-493-3p	hsa-miR-493-3p
497	hsa-miR-493-5p	10.1147	9.25239	0.563113	0.88603	15.2752	0.910985	UUGUACAUGGUAGGCUUUCAUU	experimental		mature miRNA	standard	MIMAT0002813	hsa-miR-493-5p	hsa-miR-493-5p
498	hsa-miR-494-3p	244.312	31.6076	9.01097e-16	227.299	39.5637	2.98891e-10	UGAAACAUACACGGGAAACCUC	experimental		mature miRNA	standard	MIMAT0002816	hsa-miR-494-3p	hsa-miR-494-3p
499	hsa-miR-494-5p	4.41241	7.27269	0.769395	0.752067	14.0252	0.873991	AGGUUGUCCGUGUUGUCUUCUCU	experimental		mature miRNA	standard	MIMAT0026607	hsa-miR-494-5p	hsa-miR-494-5p
500	hsa-miR-495-3p	2.35016	8.31894	0.892655	0.360943	11.8229	0.867913	AAACAAACAUGGUGCACUUCUU	experimental		mature miRNA	standard	MIMAT0002817	hsa-miR-495-3p	hsa-miR-495-3p
501	hsa-miR-495-5p	3.34205	8.46917	0.902447	0.237119	12.8025	0.944255	GAAGUUGCCCAUGUUAUUUUCG	experimental		mature miRNA	standard	MIMAT0022924	hsa-miR-495-5p	hsa-miR-495-5p
502	hsa-miR-496	3.34303	7.77574	1	0.408046	13.0268	0.918284	UGAGUAUUACAUGGCCAAUCUC	experimental		mature miRNA	standard	MIMAT0002818	hsa-miR-496	hsa-miR-496
503	hsa-miR-497-3p	0.0553934	6.01157	1	0.00262661	13.0604	1	CAAACCACACUGUGGUGUUAGA	experimental		mature miRNA	standard	MIMAT0004768	hsa-miR-497-3p	hsa-miR-497-3p
504	hsa-miR-497-5p	2.68251	6.5064	0.961487	0.571918	13.2293	0.941046	CAGCAGCACACUGUGGUUUGU	experimental		mature miRNA	standard	MIMAT0002820	hsa-miR-497-5p	hsa-miR-497-5p
505	hsa-miR-498	19.8533	8.30739	0.0231226	9.34535	15.1978	0.527799	UUUCAAGCCAGGGGGCGUUUUUC	experimental		mature miRNA	standard	MIMAT0002824	hsa-miR-498	hsa-miR-498
506	hsa-miR-499a-3p	1.46798	7.19285	1	0.00262661	13.602	1	AACAUCACAGCAAGUCUGUGCU	experimental		mature miRNA	standard	MIMAT0004772	hsa-miR-499a-3p	hsa-miR-499a-3p
507	hsa-miR-499a-5p	9.45244	10.5185	0.586909	0.266346	13.7182	1	UUAAGACUUGCAGUGAUGUUU	experimental		mature miRNA	standard	MIMAT0002870	hsa-miR-499a-5p	hsa-miR-499a-5p
508	hsa-miR-499b-3p	1.30657	7.08037	1	0.00384885	14.543	1	AACAUCACUGCAAGUCUUAACA	experimental		mature miRNA	standard	MIMAT0019898	hsa-miR-499b-3p	hsa-miR-499b-3p
509	hsa-miR-499b-5p	2.41885	6.48344	0.888123	0.00411266	14.566	1	ACAGACUUGCUGUGAUGUUCA	experimental		mature miRNA	standard	MIMAT0019897	hsa-miR-499b-5p	hsa-miR-499b-5p
510	hsa-miR-500a-3p	23.1224	8.8678	0.00704472	19.6636	19.0318	0.272212	AUGCACCUGGGCAAGGAUUCUG	experimental		mature miRNA	standard	MIMAT0002871	hsa-miR-500a-3p	hsa-miR-500a-3p
511	hsa-miR-500a-5p	18.9452	11.2744	0.0923889	9.71914	15.6671	0.421265	UAAUCCUUGCUACCUGGGUGAGA	experimental		mature miRNA	standard	MIMAT0004773	hsa-miR-500a-5p	hsa-miR-500a-5p
512	hsa-miR-500b-3p	24.2696	12.3455	0.0596149	11.348	15.1645	0.428268	GCACCCAGGCAAGGAUUCUG	experimental		mature miRNA	standard	MIMAT0027032	hsa-miR-500b-3p	hsa-miR-500b-3p
513	hsa-miR-500b-5p	25.2794	10.3042	0.0070798	19.9157	19.5229	0.374414	AAUCCUUGCUACCUGGGU	experimental		mature miRNA	standard	MIMAT0016925	hsa-miR-500b-5p	hsa-miR-500b-5p
514	hsa-miR-501-3p	16.0491	11.8955	0.24543	4.74642	15.0076	0.623978	AAUGCACCCGGGCAAGGAUUCU	experimental		mature miRNA	standard	MIMAT0004774	hsa-miR-501-3p	hsa-miR-501-3p
515	hsa-miR-501-5p	12.0524	10.9878	0.301833	4.43048	16.0417	0.720513	AAUCCUUUGUCCCUGGGUGAGA	experimental		mature miRNA	standard	MIMAT0002872	hsa-miR-501-5p	hsa-miR-501-5p
516	hsa-miR-502-3p	24.16	11.2556	0.0367933	11.0939	16.5632	0.509691	AAUGCACCUGGGCAAGGAUUCA	experimental		mature miRNA	standard	MIMAT0004775	hsa-miR-502-3p	hsa-miR-502-3p
517	hsa-miR-502-5p	10.1104	8.71493	0.545864	0.391566	14.4078	0.965151	AUCCUUGCUAUCUGGGUGCUA	experimental		mature miRNA	standard	MIMAT0002873	hsa-miR-502-5p	hsa-miR-502-5p
518	hsa-miR-503-3p	3.20674	8.80435	0.819063	0.700247	15.7147	0.992225	GGGGUAUUGUUUCCGCUGCCAGG	experimental		mature miRNA	standard	MIMAT0022925	hsa-miR-503-3p	hsa-miR-503-3p
519	hsa-miR-503-5p	2.35	7.03729	0.875414	0.169813	12.7107	1	UAGCAGCGGGAACAGUUCUGCAG	experimental		mature miRNA	standard	MIMAT0002874	hsa-miR-503-5p	hsa-miR-503-5p
520	hsa-miR-504-3p	7.0998	8.53434	0.698782	0.16708	14.5089	1	GGGAGUGCAGGGCAGGGUUUC	experimental		mature miRNA	standard	MIMAT0026612	hsa-miR-504-3p	hsa-miR-504-3p
521	hsa-miR-504-5p	0.0380718	7.345	1	0.00262661	13.7886	1	AGACCCUGGUCUGCACUCUAUC	experimental		mature miRNA	standard	MIMAT0002875	hsa-miR-504-5p	hsa-miR-504-5p
522	hsa-miR-505-3p	19.1457	10.5825	0.0938888	4.82462	15.1945	0.713022	CGUCAACACUUGCUGGUUUCCU	experimental		mature miRNA	standard	MIMAT0002876	hsa-miR-505-3p	hsa-miR-505-3p
523	hsa-miR-505-5p	0.822657	6.56098	1	0.00262661	14.8771	1	GGGAGCCAGGAAGUAUUGAUGU	experimental		mature miRNA	standard	MIMAT0004776	hsa-miR-505-5p	hsa-miR-505-5p
524	hsa-miR-506-3p	1.97577	6.99075	1	0.00397142	14.6265	1	UAAGGCACCCUUCUGAGUAGA	experimental		mature miRNA	standard	MIMAT0002878	hsa-miR-506-3p	hsa-miR-506-3p
525	hsa-miR-506-5p	0.0380718	7.25557	1	0.21188	15.8236	0.97228	UAUUCAGGAAGGUGUUACUUAA	experimental		mature miRNA	standard	MIMAT0022701	hsa-miR-506-5p	hsa-miR-506-5p
526	hsa-miR-507	0.235717	7.65644	1	0.00262661	13.9832	1	UUUUGCACCUUUUGGAGUGAA	experimental		mature miRNA	standard	MIMAT0002879	hsa-miR-507	hsa-miR-507
527	hsa-miR-508-3p	2.10758	7.76677	1	0.00262661	15.9632	1	UGAUUGUAGCCUUUUGGAGUAGA	experimental		mature miRNA	standard	MIMAT0002880	hsa-miR-508-3p	hsa-miR-508-3p
528	hsa-miR-508-5p	0.0380718	7.80718	1	0.00262661	13.016	1	UACUCCAGAGGGCGUCACUCAUG	experimental		mature miRNA	standard	MIMAT0004778	hsa-miR-508-5p	hsa-miR-508-5p
529	hsa-miR-509-3-5p	4.61965	6.97793	0.55654	3.56697	15.8174	0.76709	UACUGCAGACGUGGCAAUCAUG	experimental		mature miRNA	standard	MIMAT0004975	hsa-miR-509-3-5p	hsa-miR-509-3-5p
530	hsa-miR-509-3p	4.10954	8.10879	0.714629	1.81653	14.3843	0.845046	UGAUUGGUACGUCUGUGGGUAG	experimental		mature miRNA	standard	MIMAT0002881	hsa-miR-509-3p	hsa-miR-509-3p
531	hsa-miR-509-5p	1.44921	6.62238	1	4.22313	13.7438	0.74215	UACUGCAGACAGUGGCAAUCA	experimental		mature miRNA	standard	MIMAT0004779	hsa-miR-509-5p	hsa-miR-509-5p
532	hsa-miR-510-3p	1.34929	6.69868	1	2.09588	14.3743	0.746786	AUUGAAACCUCUAAGAGUGGA	experimental		mature miRNA	standard	MIMAT0026613	hsa-miR-510-3p	hsa-miR-510-3p
533	hsa-miR-510-5p	2.83775	7.02802	0.734665	2.87034	13.9834	0.821062	UACUCAGGAGAGUGGCAAUCAC	experimental		mature miRNA	standard	MIMAT0002882	hsa-miR-510-5p	hsa-miR-510-5p
534	hsa-miR-511-3p	0.0198909	5.54303	1	5.4264	16.7224	0.533312	AAUGUGUAGCAAAAGACAGA	experimental		mature miRNA	standard	MIMAT0026606	hsa-miR-511-3p	hsa-miR-511-3p
535	hsa-miR-511-5p	4.56344	7.51725	0.599514	3.56856	13.4945	0.765787	GUGUCUUUUGCUCUGCAGUCA	experimental		mature miRNA	standard	MIMAT0002808	hsa-miR-511-5p	hsa-miR-511-5p
536	hsa-miR-512-3p	2.54037	6.87685	0.724255	5.21759	13.8737	0.640548	AAGUGCUGUCAUAGCUGAGGUC	experimental		mature miRNA	standard	MIMAT0002823	hsa-miR-512-3p	hsa-miR-512-3p
537	hsa-miR-512-5p	3.3843	8.96558	0.989307	0.230485	13.2181	1	CACUCAGCCUUGAGGGCACUUUC	experimental		mature miRNA	standard	MIMAT0002822	hsa-miR-512-5p	hsa-miR-512-5p
538	hsa-miR-513a-3p	0.0250053	7.76654	1	0.677445	14.4656	0.932746	UAAAUUUCACCUUUCUGAGAAGG	experimental		mature miRNA	standard	MIMAT0004777	hsa-miR-513a-3p	hsa-miR-513a-3p
539	hsa-miR-513a-5p	3.20593	10.2524	0.828971	0.962073	14.0758	0.948321	UUCACAGGGAGGUGUCAU	experimental		mature miRNA	standard	MIMAT0002877	hsa-miR-513a-5p	hsa-miR-513a-5p
540	hsa-miR-513b-3p	0.592455	9.06234	1	1.61809	14.0264	0.858332	AAAUGUCACCUUUUUGAGAGGA	experimental		mature miRNA	standard	MIMAT0026749	hsa-miR-513b-3p	hsa-miR-513b-3p
541	hsa-miR-513b-5p	0.392979	6.25152	1	1.93562	14.8623	0.865909	UUCACAAGGAGGUGUCAUUUAU	experimental		mature miRNA	standard	MIMAT0005788	hsa-miR-513b-5p	hsa-miR-513b-5p
542	hsa-miR-513c-3p	2.25437	8.06721	1	0.897328	14.738	0.98342	UAAAUUUCACCUUUCUGAGAAGA	experimental		mature miRNA	standard	MIMAT0022728	hsa-miR-513c-3p	hsa-miR-513c-3p
543	hsa-miR-513c-5p	3.15568	8.949	0.929832	0.735665	14.5235	0.948894	UUCUCAAGGAGGUGUCGUUUAU	experimental		mature miRNA	standard	MIMAT0005789	hsa-miR-513c-5p	hsa-miR-513c-5p
544	hsa-miR-514a-3p	0.0268925	7.51353	1	1.43836	12.9186	0.808621	AUUGACACUUCUGUGAGUAGA	experimental		mature miRNA	standard	MIMAT0002883	hsa-miR-514a-3p	hsa-miR-514a-3p
545	hsa-miR-514a-5p	0.0213455	6.58058	1	2.42568	16.0181	0.805295	UACUCUGGAGAGUGACAAUCAUG	experimental		mature miRNA	standard	MIMAT0022702	hsa-miR-514a-5p	hsa-miR-514a-5p
546	hsa-miR-514b-3p	0.0208451	7.29572	1	3.73947	13.8029	0.57734	AUUGACACCUCUGUGAGUGGA	experimental		mature miRNA	standard	MIMAT0015088	hsa-miR-514b-3p	hsa-miR-514b-3p
547	hsa-miR-514b-5p	3.82438	8.51245	0.710012	4.14083	16.1825	0.700823	UUCUCAAGAGGGAGGCAAUCAU	experimental		mature miRNA	standard	MIMAT0015087	hsa-miR-514b-5p	hsa-miR-514b-5p
548	hsa-miR-515-3p	0.0220461	7.43262	1	1.96565	13.9144	0.737355	GAGUGCCUUCUUUUGGAGCGUU	experimental		mature miRNA	standard	MIMAT0002827	hsa-miR-515-3p	hsa-miR-515-3p
549	hsa-miR-515-5p	2.35707	7.70615	0.960445	1.18506	14.7539	0.839386	UUCUCCAAAAGAAAGCACUUUCUG	experimental		mature miRNA	standard	MIMAT0002826	hsa-miR-515-5p	hsa-miR-515-5p
550	hsa-miR-516a-3p	0.802903	7.47823	1	1.40435	16.8809	0.819173	UGCUUCCUUUCAGAGGGU	experimental		mature miRNA	standard	MIMAT0006778,MIMAT0002860	hsa-miR-516a-3p	hsa-miR-516a-3p, hsa-miR-516b-3p
551	hsa-miR-516a-5p	0.313705	7.01561	1	1.71407	12.9001	0.742063	UUCUCGAGGAAAGAAGCACUUUC	experimental		mature miRNA	standard	MIMAT0004770	hsa-miR-516a-5p	hsa-miR-516a-5p
552	hsa-miR-516b-5p	3.2621	7.08731	0.681541	5.2656	14.4477	0.584504	AUCUGGAGGUAAGAAGCACUUU	experimental		mature miRNA	standard	MIMAT0002859	hsa-miR-516b-5p	hsa-miR-516b-5p
553	hsa-miR-517-5p	2.65892	6.04294	0.671953	13.5359	31.0326	0.633538	CCUCUAGAUGGAAGCACUGUCU	experimental		mature miRNA	standard	MIMAT0002851	hsa-miR-517-5p	hsa-miR-517-5p
554	hsa-miR-517a-3p	0.134417	6.18668	0.983872	1.97928	13.8184	0.722717	AUCGUGCAUCCCUUUAGAGUGU	experimental		mature miRNA	standard	MIMAT0002852,MIMAT0002857	hsa-miR-517a-3p	hsa-miR-517a-3p, hsa-miR-517b-3p
555	hsa-miR-517c-3p	4.4067	7.82193	0.692657	0.913678	14.7972	0.860174	AUCGUGCAUCCUUUUAGAGUGU	experimental		mature miRNA	standard	MIMAT0002866	hsa-miR-517c-3p	hsa-miR-517c-3p
556	hsa-miR-518a-3p	0.674917	7.64929	1	0.227202	14.0366	1	GAAAGCGCUUCCCUUUGCUGGA	experimental		mature miRNA	standard	MIMAT0002863	hsa-miR-518a-3p	hsa-miR-518a-3p
557	hsa-miR-518a-5p	1.04138	6.89749	1	2.50113	15.3814	0.804221	CUGCAAAGGGAAGCCCUUUC	experimental		mature miRNA	standard	MIMAT0005457,MIMAT0002862	hsa-miR-518a-5p	hsa-miR-518a-5p, hsa-miR-527
558	hsa-miR-518b	2.94772	8.12147	1	1.23043	15.7384	0.863933	CAAAGCGCUCCCCUUUAGAGGU	experimental		mature miRNA	standard	MIMAT0002844	hsa-miR-518b	hsa-miR-518b
559	hsa-miR-518c-3p	3.72814	6.86112	0.75534	4.85335	13.8961	0.736858	CAAAGCGCUUCUCUUUAGAGUGU	experimental		mature miRNA	standard	MIMAT0002848	hsa-miR-518c-3p	hsa-miR-518c-3p
560	hsa-miR-518c-5p	3.01558	6.28535	0.847075	2.18274	13.4607	0.819172	UCUCUGGAGGGAAGCACUUUCUG	experimental		mature miRNA	standard	MIMAT0002847	hsa-miR-518c-5p	hsa-miR-518c-5p
561	hsa-miR-518d-3p	0.446345	6.26857	1	2.60646	13.1411	0.741236	CAAAGCGCUUCCCUUUGGAGC	experimental		mature miRNA	standard	MIMAT0002864	hsa-miR-518d-3p	hsa-miR-518d-3p
562	hsa-miR-518d-5p	3.75644	6.37147	0.902454	1.06559	11.8391	0.899707	CUCUAGAGGGAAGCACUUUCUG	experimental		mature miRNA	standard	MIMAT0005456,MIMAT0005455,MIMAT0002845	hsa-miR-518d-5p	hsa-miR-518d-5p, hsa-miR-520c-5p, hsa-miR-526a
563	hsa-miR-518e-3p	2.31757	6.58886	0.92791	1.46581	13.0345	0.857999	AAAGCGCUUCCCUUCAGAGUG	experimental		mature miRNA	standard	MIMAT0002861	hsa-miR-518e-3p	hsa-miR-518e-3p
564	hsa-miR-518e-5p	4.2754	5.9715	0.853473	0.740222	13.7221	0.874212	CUCUAGAGGGAAGCGCUUUCUG	experimental		mature miRNA	standard	MIMAT0005450,MIMAT0005452,MIMAT0005454,MIMAT0002831,MIMAT0005451,MIMAT0005449	hsa-miR-518e-5p	hsa-miR-518e-5p, hsa-miR-519a-5p, hsa-miR-519b-5p, hsa-miR-519c-5p, hsa-miR-522-5p, hsa-miR-523-5p
565	hsa-miR-518f-3p	3.57001	6.00907	0.754099	5.09414	15.2286	0.607454	GAAAGCGCUUCUCUUUAGAGG	experimental		mature miRNA	standard	MIMAT0002842	hsa-miR-518f-3p	hsa-miR-518f-3p
566	hsa-miR-518f-5p	4.56854	7.22774	0.723259	1.46857	12.8601	0.823527	CUCUAGAGGGAAGCACUUUCUC	experimental		mature miRNA	standard	MIMAT0002841	hsa-miR-518f-5p	hsa-miR-518f-5p
567	hsa-miR-519a-3p	2.57953	6.87047	0.789106	2.59973	12.8276	0.768105	AAAGUGCAUCCUUUUAGAGUGU	experimental		mature miRNA	standard	MIMAT0002869	hsa-miR-519a-3p	hsa-miR-519a-3p
568	hsa-miR-519b-3p	4.21022	8.16796	0.809048	0.754869	12.9242	0.884713	AAAGUGCAUCCUUUUAGAGGUU	experimental		mature miRNA	standard	MIMAT0002837	hsa-miR-519b-3p	hsa-miR-519b-3p
569	hsa-miR-519c-3p	8.73791	10.9647	0.706032	0.00454889	13.7491	0.928509	AAAGUGCAUCUUUUUAGAGGAU	experimental		mature miRNA	standard	MIMAT0002832	hsa-miR-519c-3p	hsa-miR-519c-3p
570	hsa-miR-519d-3p	12.1555	9.45318	0.484818	0.99152	12.7062	0.925698	CAAAGUGCCUCCCUUUAGAGUG	experimental		mature miRNA	standard	MIMAT0002853	hsa-miR-519d-3p	hsa-miR-519d-3p
571	hsa-miR-519d-5p	9.79368	8.75138	0.552988	0.345663	12.4545	0.989907	CCUCCAAAGGGAAGCGCUUUCUGUU	experimental		mature miRNA	standard	MIMAT0026610	hsa-miR-519d-5p	hsa-miR-519d-5p
572	hsa-miR-519e-3p	1.01714	6.18456	1	0.392316	13.5073	0.872265	AAGUGCCUCCUUUUAGAGUGUU	experimental		mature miRNA	standard	MIMAT0002829	hsa-miR-519e-3p	hsa-miR-519e-3p
573	hsa-miR-519e-5p	3.11615	8.59723	0.911482	0.00397647	13.7155	1	UUCUCCAAAAGGGAGCACUUUC	experimental		mature miRNA	standard	MIMAT0002828	hsa-miR-519e-5p	hsa-miR-519e-5p
574	hsa-miR-520a-3p	3.22352	8.57613	1	0.00387043	12.4532	1	AAAGUGCUUCCCUUUGGACUGU	experimental		mature miRNA	standard	MIMAT0002834	hsa-miR-520a-3p	hsa-miR-520a-3p
575	hsa-miR-520a-5p	1.73938	8.58268	1	0.00397263	12.261	1	CUCCAGAGGGAAGUACUUUCU	experimental		mature miRNA	standard	MIMAT0002833	hsa-miR-520a-5p	hsa-miR-520a-5p
576	hsa-miR-520b	0.827428	6.70267	0.976496	0.889606	12.9631	0.881759	AAAGUGCUUCCUUUUAGAGGG	experimental		mature miRNA	standard	MIMAT0002843	hsa-miR-520b	hsa-miR-520b
577	hsa-miR-520c-3p	6.64921	9.18106	0.739103	0.195244	13.0288	1	AAAGUGCUUCCUUUUAGAGGGU	experimental		mature miRNA	standard	MIMAT0002846	hsa-miR-520c-3p	hsa-miR-520c-3p
578	hsa-miR-520d-3p	4.33761	7.15375	0.8246	0.0700127	11.953	0.87693	AAAGUGCUUCUCUUUGGUGGGU	experimental		mature miRNA	standard	MIMAT0002856	hsa-miR-520d-3p	hsa-miR-520d-3p
579	hsa-miR-520d-5p	3.9038	7.38888	0.74154	0.823364	14.049	0.94839	CUACAAAGGGAAGCCCUUUC	experimental		mature miRNA	standard	MIMAT0002855	hsa-miR-520d-5p	hsa-miR-520d-5p
580	hsa-miR-520e	7.69094	7.09189	0.648994	0.0044592	12.4507	0.994961	AAAGUGCUUCCUUUUUGAGGG	experimental		mature miRNA	standard	MIMAT0002825	hsa-miR-520e	hsa-miR-520e
581	hsa-miR-520f-3p	4.30113	6.6902	0.635128	2.36563	11.9991	0.736852	AAGUGCUUCCUUUUAGAGGGUU	experimental		mature miRNA	standard	MIMAT0002830	hsa-miR-520f-3p	hsa-miR-520f-3p
582	hsa-miR-520f-5p	5.50548	9.79036	0.812885	0.186441	11.2796	0.933122	CCUCUAAAGGGAAGCGCUUUCU	experimental		mature miRNA	standard	MIMAT0026609	hsa-miR-520f-5p	hsa-miR-520f-5p
583	hsa-miR-520g-3p	4.93487	8.03326	0.635579	2.08284	14.2252	0.819558	ACAAAGUGCUUCCCUUUAGAGUGU	experimental		mature miRNA	standard	MIMAT0002858	hsa-miR-520g-3p	hsa-miR-520g-3p
584	hsa-miR-520g-5p	6.02235	7.84457	0.548672	2.1473	14.2282	0.790529	UCUAGAGGAAGCACUUUCUGUUU	experimental		mature miRNA	standard	MIMAT0026611	hsa-miR-520g-5p	hsa-miR-520g-5p
585	hsa-miR-520h	7.17718	7.34689	0.632826	1.59361	12.0165	0.715223	ACAAAGUGCUUCCCUUUAGAGU	experimental		mature miRNA	standard	MIMAT0002867	hsa-miR-520h	hsa-miR-520h
586	hsa-miR-521	9.80124	8.49322	0.401157	1.37535	11.9072	0.818748	AACGCACUUCCCUUUAGAGUGU	experimental		mature miRNA	standard	MIMAT0002854	hsa-miR-521	hsa-miR-521
587	hsa-miR-522-3p	14.1429	8.56161	0.393604	1.02067	12.2627	0.854751	AAAAUGGUUCCCUUUAGAGUGU	experimental		mature miRNA	standard	MIMAT0002868	hsa-miR-522-3p	hsa-miR-522-3p
588	hsa-miR-523-3p	8.06551	7.65385	0.609834	0.410296	13.8616	0.88565	GAACGCGCUUCCCUAUAGAGGGU	experimental		mature miRNA	standard	MIMAT0002840	hsa-miR-523-3p	hsa-miR-523-3p
589	hsa-miR-524-3p	6.10015	9.90294	0.641243	1.92744	12.6835	0.782958	GAAGGCGCUUCCCUUUGGAGU	experimental		mature miRNA	standard	MIMAT0002850	hsa-miR-524-3p	hsa-miR-524-3p
590	hsa-miR-524-5p	11.3661	14.2391	0.466432	8.45069	14.3237	0.453133	CUACAAAGGGAAGCACUUUCUC	experimental		mature miRNA	standard	MIMAT0002849	hsa-miR-524-5p	hsa-miR-524-5p
591	hsa-miR-525-3p	2.56151	8.1515	1	0.380271	11.8602	0.871375	GAAGGCGCUUCCCUUUAGAGCG	experimental		mature miRNA	standard	MIMAT0002839	hsa-miR-525-3p	hsa-miR-525-3p
592	hsa-miR-525-5p	1.76188	5.83068	0.917449	1.67016	14.6921	0.801297	CUCCAGAGGGAUGCACUUUCU	experimental		mature miRNA	standard	MIMAT0002838	hsa-miR-525-5p	hsa-miR-525-5p
593	hsa-miR-526b-3p	3.51941	8.66186	0.956458	0.318039	13.4017	0.966206	GAAAGUGCUUCCUUUUAGAGGC	experimental		mature miRNA	standard	MIMAT0002836	hsa-miR-526b-3p	hsa-miR-526b-3p
594	hsa-miR-526b-5p	0.0380718	6.78599	1	0.00263323	13.0515	0.956547	CUCUUGAGGGAAGCACUUUCUGU	experimental		mature miRNA	standard	MIMAT0002835	hsa-miR-526b-5p	hsa-miR-526b-5p
595	hsa-miR-532-3p	23.3321	15.215	0.11803	15.2886	19.9292	0.472959	CCUCCCACACCCAAGGCUUGCA	experimental		mature miRNA	standard	MIMAT0004780	hsa-miR-532-3p	hsa-miR-532-3p
596	hsa-miR-532-5p	12.6823	7.72084	0.115843	12.2116	15.4911	0.504393	CAUGCCUUGAGUGUAGGACCGU	experimental		mature miRNA	standard	MIMAT0002888	hsa-miR-532-5p	hsa-miR-532-5p
597	hsa-miR-539-3p	2.32348	6.51474	0.814373	2.84088	14.392	0.759474	AUCAUACAAGGACAAUUUCUUU	experimental		mature miRNA	standard	MIMAT0022705	hsa-miR-539-3p	hsa-miR-539-3p
598	hsa-miR-539-5p	5.55825	7.70625	0.681257	0.0975069	11.7985	0.949108	GGAGAAAUUAUCCUUGGUGUGU	experimental		mature miRNA	standard	MIMAT0003163	hsa-miR-539-5p	hsa-miR-539-5p
599	hsa-miR-541-3p	0.165504	6.7959	1	0.395089	12.4102	0.917149	UGGUGGGCACAGAAUCUGGACU	experimental		mature miRNA	standard	MIMAT0004920	hsa-miR-541-3p	hsa-miR-541-3p
600	hsa-miR-541-5p	0.330896	8.07085	1	0.461839	12.196	0.972584	AAAGGAUUCUGCUGUCGGUCCCACU	experimental		mature miRNA	standard	MIMAT0004919	hsa-miR-541-5p	hsa-miR-541-5p
601	hsa-miR-542-3p	1.41252	7.14611	1	0.00368248	14.0972	1	UGUGACAGAUUGAUAACUGAAA	experimental		mature miRNA	standard	MIMAT0003389	hsa-miR-542-3p	hsa-miR-542-3p
602	hsa-miR-542-5p	0.124674	6.95684	1	0.00262661	13.6222	1	UCGGGGAUCAUCAUGUCACGAGA	experimental		mature miRNA	standard	MIMAT0003340	hsa-miR-542-5p	hsa-miR-542-5p
603	hsa-miR-543	0.0380718	7.6259	1	0.00262661	14.0149	1	AAACAUUCGCGGUGCACUUCUU	experimental		mature miRNA	standard	MIMAT0004954	hsa-miR-543	hsa-miR-543
604	hsa-miR-544a	0.0380718	6.34927	1	0.00262661	13.578	1	AUUCUGCAUUUUUAGCAAGUUC	experimental		mature miRNA	standard	MIMAT0003164	hsa-miR-544a	hsa-miR-544a
605	hsa-miR-544b	0.0380718	7.29975	1	0.00262661	13.901	1	ACCUGAGGUUGUGCAUUUCUAA	experimental		mature miRNA	standard	MIMAT0015004	hsa-miR-544b	hsa-miR-544b
606	hsa-miR-545-3p	1.88848	6.38009	1	0.593462	13.0151	0.971268	UCAGCAAACAUUUAUUGUGUGC	experimental		mature miRNA	standard	MIMAT0003165	hsa-miR-545-3p	hsa-miR-545-3p
607	hsa-miR-545-5p	0.0380718	6.67427	1	0.00262661	13.8001	1	UCAGUAAAUGUUUAUUAGAUGA	experimental		mature miRNA	standard	MIMAT0004785	hsa-miR-545-5p	hsa-miR-545-5p
608	hsa-miR-548a-3p	3.33317	9.21968	0.985153	0.905716	13.4494	0.902696	CAAAACUGGCAAUUACUUUUGC	experimental		mature miRNA	standard	MIMAT0003251	hsa-miR-548a-3p	hsa-miR-548a-3p
609	hsa-miR-548a-5p	3.94309	6.76755	0.811511	1.1251	13.5787	0.976703	AAAAGUAAUUGCGAGUUUUACC	experimental		mature miRNA	standard	MIMAT0004803	hsa-miR-548a-5p	hsa-miR-548a-5p
610	hsa-miR-548b-3p	3.171	6.19041	0.713611	3.78616	12.2143	0.670612	CAAGAACCUCAGUUGCUUUUGU	experimental		mature miRNA	standard	MIMAT0003254	hsa-miR-548b-3p	hsa-miR-548b-3p
611	hsa-miR-548b-5p	3.72091	7.83505	0.730411	4.98928	15.6334	0.657955	AAAAGUAAUUGUGGUUUUGGCC	experimental		mature miRNA	standard	MIMAT0004798	hsa-miR-548b-5p	hsa-miR-548b-5p
612	hsa-miR-548c-3p	4.05569	7.33033	0.677597	4.84515	11.6709	0.630149	CAAAAAUCUCAAUUACUUUUGC	experimental		mature miRNA	standard	MIMAT0003285	hsa-miR-548c-3p	hsa-miR-548c-3p
613	hsa-miR-548d-3p	3.46439	7.39077	0.729558	3.75862	14.3136	0.697818	CAAAAACCACAGUUUCUUUUGC	experimental		mature miRNA	standard	MIMAT0003323	hsa-miR-548d-3p	hsa-miR-548d-3p
614	hsa-miR-548d-5p	3.45151	6.46762	0.643973	16.0319	20.7419	0.417433	AAAAGUAAUUGUGGUUUUUGCC	experimental		mature miRNA	standard	MIMAT0004812	hsa-miR-548d-5p	hsa-miR-548d-5p
615	hsa-miR-548e-3p	0.77074	8.2326	1	4.15176	13.4968	0.573072	AAAAACUGAGACUACUUUUGCA	experimental		mature miRNA	standard	MIMAT0005874	hsa-miR-548e-3p	hsa-miR-548e-3p
616	hsa-miR-548e-5p	0.92332	6.6308	1	0.752218	12.8334	0.833546	CAAAAGCAAUCGCGGUUUUUGC	experimental		mature miRNA	standard	MIMAT0026736	hsa-miR-548e-5p	hsa-miR-548e-5p
617	hsa-miR-548f-3p	0.0215895	7.54828	1	2.64871	14.5488	0.674479	AAAAACUGUAAUUACUUUU	experimental		mature miRNA	standard	MIMAT0005895	hsa-miR-548f-3p	hsa-miR-548f-3p
618	hsa-miR-548f-5p	3.54051	9.78706	0.887928	1.82316	11.6142	0.779864	UGCAAAAGUAAUCACAGUUUUU	experimental		mature miRNA	standard	MIMAT0026739	hsa-miR-548f-5p	hsa-miR-548f-5p
619	hsa-miR-548g-3p	0.890438	7.14053	1	4.24379	14.0551	0.574585	AAAACUGUAAUUACUUUUGUAC	experimental		mature miRNA	standard	MIMAT0005912	hsa-miR-548g-3p	hsa-miR-548g-3p
620	hsa-miR-548h-3p	4.01238	8.90683	0.862976	6.87977	18.5125	0.672575	CAAAAACCGCAAUUACUUUUGCA	experimental		mature miRNA	standard	MIMAT0022723,MIMAT0018446	hsa-miR-548h-3p	hsa-miR-548h-3p, hsa-miR-548z
621	hsa-miR-548h-5p	0.921878	7.12464	1	7.50348	25.1844	0.589282	AAAAGUAAUCGCGGUUUUUGUC	experimental		mature miRNA	standard	MIMAT0005928	hsa-miR-548h-5p	hsa-miR-548h-5p
622	hsa-miR-548i	1.17673	6.8554	0.991072	2.94604	14.6109	0.655202	AAAAGUAAUUGCGGAUUUUGCC	experimental		mature miRNA	standard	MIMAT0005935	hsa-miR-548i	hsa-miR-548i
623	hsa-miR-548j-3p	0.528231	6.38961	1	4.28642	15.8188	0.69447	CAAAAACUGCAUUACUUUUGC	experimental		mature miRNA	standard	MIMAT0026737	hsa-miR-548j-3p	hsa-miR-548j-3p
624	hsa-miR-548j-5p	3.33897	8.16585	0.758866	3.83068	13.957	0.664946	AAAAGUAAUUGCGGUCUUUGGU	experimental		mature miRNA	standard	MIMAT0005875	hsa-miR-548j-5p	hsa-miR-548j-5p
625	hsa-miR-548k	2.20829	7.71839	1	4.0864	20.4317	0.643526	AAAAGUACUUGCGGAUUUUGCU	experimental		mature miRNA	standard	MIMAT0005882	hsa-miR-548k	hsa-miR-548k
626	hsa-miR-548l	0.838774	6.02875	1	4.89688	12.8908	0.544053	AAAAGUAUUUGCGGGUUUUGUC	experimental		mature miRNA	standard	MIMAT0005889	hsa-miR-548l	hsa-miR-548l
627	hsa-miR-548m	2.33183	7.43599	0.888459	3.29265	13.2395	0.670295	CAAAGGUAUUUGUGGUUUUUG	experimental		mature miRNA	standard	MIMAT0005917	hsa-miR-548m	hsa-miR-548m
628	hsa-miR-548n	1.50554	7.77042	0.997455	3.07	13.8249	0.650956	CAAAAGUAAUUGUGGAUUUUGU	experimental		mature miRNA	standard	MIMAT0005916	hsa-miR-548n	hsa-miR-548n
629	hsa-miR-548o-3p	0.023075	5.72751	1	0.94758	13.5598	0.800335	CCAAAACUGCAGUUACUUUUGC	experimental		mature miRNA	standard	MIMAT0005919	hsa-miR-548o-3p	hsa-miR-548o-3p
630	hsa-miR-548p	1.83886	6.01388	0.829307	9.22584	13.0517	0.44901	UAGCAAAAACUGCAGUUACUUU	experimental		mature miRNA	standard	MIMAT0005934	hsa-miR-548p	hsa-miR-548p
631	hsa-miR-548q	15.6118	8.17699	0.0588947	17.2169	17.4861	0.362454	GCUGGUGCAAAAGUAAUGGCGG	experimental		mature miRNA	standard	MIMAT0011163	hsa-miR-548q	hsa-miR-548q
632	hsa-miR-548s	4.84808	11.933	0.735806	10.4181	14.8842	0.343669	AUGGCCAAAACUGCAGUUAUUUU	experimental		mature miRNA	standard	MIMAT0014987	hsa-miR-548s	hsa-miR-548s
633	hsa-miR-548t-5p	2.11208	6.62694	0.881932	9.60275	13.9795	0.465591	CAAAAGUGAUCGUGGUUUUUG	experimental		mature miRNA	standard	MIMAT0015009	hsa-miR-548t-5p	hsa-miR-548t-5p
634	hsa-miR-548u	1.46516	6.5042	0.871994	11.0413	14.1431	0.35971	CAAAGACUGCAAUUACUUUUGCG	experimental		mature miRNA	standard	MIMAT0015013	hsa-miR-548u	hsa-miR-548u
635	hsa-miR-548v	3.43097	7.09759	0.709822	7.29715	13.0226	0.488273	AGCUACAGUUACUUUUGCACCA	experimental		mature miRNA	standard	MIMAT0015020	hsa-miR-548v	hsa-miR-548v
636	hsa-miR-548w	7.47144	6.6701	0.317613	13.6735	13.1984	0.419143	AAAAGUAACUGCGGUUUUUGCCU	experimental		mature miRNA	standard	MIMAT0015060	hsa-miR-548w	hsa-miR-548w
637	hsa-miR-548x-3p	1.54406	6.03965	0.927412	14.3204	27.5566	0.419318	UAAAAACUGCAAUUACUUUC	experimental		mature miRNA	standard	MIMAT0015081	hsa-miR-548x-3p	hsa-miR-548x-3p
638	hsa-miR-548y	4.69262	7.05063	0.565297	12.5447	13.1557	0.371506	AAAAGUAAUCACUGUUUUUGCC	experimental		mature miRNA	standard	MIMAT0018354	hsa-miR-548y	hsa-miR-548y
639	hsa-miR-548aa	8.16174	8.27326	0.625491	2.33589	13.9803	0.699648	AAAAACCACAAUUACUUUUGCACCA	experimental		mature miRNA	standard	MIMAT0018447,MIMAT0022730	hsa-miR-548aa	hsa-miR-548aa, hsa-miR-548t-3p
640	hsa-miR-548ba	2.83219	6.09736	0.756374	6.70706	12.7946	0.536404	AAAGGUAACUGUGAUUUUUGCU	experimental		mature miRNA	standard	MIMAT0031175	hsa-miR-548ba	hsa-miR-548ba
641	hsa-miR-548ab	5.36611	7.82371	0.697622	0.0749477	15.2012	0.928648	AAAAGUAAUUGUGGAUUUUGCU	experimental		mature miRNA	standard	MIMAT0018928	hsa-miR-548ab	hsa-miR-548ab
642	hsa-miR-548ac	1.67164	7.46992	1	0.23222	12.7036	0.953667	CAAAAACCGGCAAUUACUUUUG	experimental		mature miRNA	standard	MIMAT0018938	hsa-miR-548ac	hsa-miR-548ac
643	hsa-miR-548ad	1.59096	7.10007	0.909615	1.31213	14.8691	0.867537	GAAAACGACAAUGACUUUUGCA	experimental		mature miRNA	standard	MIMAT0018946	hsa-miR-548ad	hsa-miR-548ad
644	hsa-miR-548ae	0.0770839	6.92489	1	0.00262661	11.6146	1	CAAAAACUGCAAUUACUUUCA	experimental		mature miRNA	standard	MIMAT0018954	hsa-miR-548ae	hsa-miR-548ae
645	hsa-miR-548ag	2.70657	6.68193	0.786662	2.23618	11.4598	0.756626	AAAGGUAAUUGUGGUUUCUGC	experimental		mature miRNA	standard	MIMAT0018969	hsa-miR-548ag	hsa-miR-548ag
646	hsa-miR-548ah-3p	2.00156	6.54811	0.983009	3.0069	11.3616	0.709542	CAAAAACUGCAGUUACUUUUGC	experimental		mature miRNA	standard	MIMAT0020957	hsa-miR-548ah-3p	hsa-miR-548ah-3p
647	hsa-miR-548ah-5p	4.17529	7.54182	0.67766	4.66848	12.5284	0.592329	AAAAGUGAUUGCAGUGUUUG	experimental		mature miRNA	standard	MIMAT0018972	hsa-miR-548ah-5p	hsa-miR-548ah-5p
648	hsa-miR-548ai	4.07577	7.29732	0.68198	3.2786	11.719	0.708783	AAAGGUAAUUGCAGUUUUUCCC	experimental		mature miRNA	standard	MIMAT0018989,MIMAT0022707	hsa-miR-548ai	hsa-miR-548ai, hsa-miR-570-5p
649	hsa-miR-548aj-3p	3.23799	8.16766	0.918332	0.155495	11.6473	0.937317	UAAAAACUGCAAUUACUUUUA	experimental		mature miRNA	standard	MIMAT0018990	hsa-miR-548aj-3p	hsa-miR-548aj-3p
650	hsa-miR-548aj-5p	1.45069	5.97792	0.87043	4.50026	15.1088	0.605903	UGCAAAAGUAAUUGCAGUUUUUG	experimental		mature miRNA	standard	MIMAT0022739,MIMAT0022722,MIMAT0022733	hsa-miR-548aj-5p	hsa-miR-548aj-5p, hsa-miR-548g-5p, hsa-miR-548x-5p
651	hsa-miR-548ak	1.69361	7.6483	1	1.47924	11.8712	0.729225	AAAAGUAACUGCGGUUUUUGA	experimental		mature miRNA	standard	MIMAT0019013	hsa-miR-548ak	hsa-miR-548ak
652	hsa-miR-548al	0.151962	5.55943	1	0.939756	11.9024	0.798244	AACGGCAAUGACUUUUGUACCA	experimental		mature miRNA	standard	MIMAT0019024	hsa-miR-548al	hsa-miR-548al
653	hsa-miR-548am-3p	2.0794	7.19172	0.887371	4.01537	12.367	0.646325	CAAAAACUGCAGUUACUUUUGU	experimental		mature miRNA	standard	MIMAT0019076	hsa-miR-548am-3p	hsa-miR-548am-3p
654	hsa-miR-548am-5p	3.65578	9.30624	0.878504	0.0718295	14.8789	0.942804	AAAAGUAAUUGCGGUUUUUGCC	experimental		mature miRNA	standard	MIMAT0022740,MIMAT0004806,MIMAT0022738	hsa-miR-548am-5p	hsa-miR-548am-5p, hsa-miR-548c-5p, hsa-miR-548o-5p
655	hsa-miR-548an	0.0380718	6.38995	1	0.00262661	12.2941	1	AAAAGGCAUUGUGGUUUUUG	experimental		mature miRNA	standard	MIMAT0019079	hsa-miR-548an	hsa-miR-548an
656	hsa-miR-548ao-3p	0.795051	6.88286	1	0.00262661	12.7755	1	AAAGACCGUGACUACUUUUGCA	experimental		mature miRNA	standard	MIMAT0021030	hsa-miR-548ao-3p	hsa-miR-548ao-3p
657	hsa-miR-548ao-5p	2.6019	8.32499	0.956242	0.612019	12.6857	0.978139	AGAAGUAACUACGGUUUUUGCA	experimental		mature miRNA	standard	MIMAT0021029	hsa-miR-548ao-5p	hsa-miR-548ao-5p
658	hsa-miR-548ap-3p	1.56267	7.57829	0.950361	2.06529	12.9392	0.753517	AAAAACCACAAUUACUUUU	experimental		mature miRNA	standard	MIMAT0021038	hsa-miR-548ap-3p	hsa-miR-548ap-3p
659	hsa-miR-548ap-5p	0.30329	6.38294	1	0.418732	13.2591	0.859456	AAAAGUAAUUGCGGUCUUU	experimental		mature miRNA	standard	MIMAT0021037	hsa-miR-548ap-5p	hsa-miR-548ap-5p
660	hsa-miR-548aq-3p	1.53189	7.61613	0.99564	2.75215	12.5758	0.611511	CAAAAACUGCAAUUACUUUUGC	experimental		mature miRNA	standard	MIMAT0022264	hsa-miR-548aq-3p	hsa-miR-548aq-3p
661	hsa-miR-548aq-5p	2.52606	6.30825	1	0.294655	13.7337	0.969464	GAAAGUAAUUGCUGUUUUUGCC	experimental		mature miRNA	standard	MIMAT0022263	hsa-miR-548aq-5p	hsa-miR-548aq-5p
662	hsa-miR-548ar-3p	0.0380718	7.17732	1	0.135178	13.9199	1	UAAAACUGCAGUUAUUUUUGC	experimental		mature miRNA	standard	MIMAT0022266	hsa-miR-548ar-3p	hsa-miR-548ar-3p
663	hsa-miR-548ar-5p	1.83704	6.46324	1	0.512804	13.9337	0.942239	AAAAGUAAUUGCAGUUUUUGC	experimental		mature miRNA	standard	MIMAT0022265	hsa-miR-548ar-5p	hsa-miR-548ar-5p
664	hsa-miR-548as-3p	0.763325	5.86246	1	0.00262661	16.029	0.972024	UAAAACCCACAAUUAUGUUUGU	experimental		mature miRNA	standard	MIMAT0022268	hsa-miR-548as-3p	hsa-miR-548as-3p
665	hsa-miR-548as-5p	4.77474	9.09615	0.812981	0.50976	14.2237	0.88442	AAAAGUAAUUGCGGGUUUUGCC	experimental		mature miRNA	standard	MIMAT0022267	hsa-miR-548as-5p	hsa-miR-548as-5p
666	hsa-miR-548at-3p	0.0380718	7.64636	1	0.138861	12.8111	1	CAAAACCGCAGUAACUUUUGU	experimental		mature miRNA	standard	MIMAT0022278	hsa-miR-548at-3p	hsa-miR-548at-3p
667	hsa-miR-548at-5p	0.0260999	6.75126	1	0.33863	13.2137	0.956316	AAAAGUUAUUGCGGUUUUGGCU	experimental		mature miRNA	standard	MIMAT0022277	hsa-miR-548at-5p	hsa-miR-548at-5p
668	hsa-miR-548au-3p	0.0320521	8.26949	1	0.30553	13.0024	0.875197	UGGCAGUUACUUUUGCACCAG	experimental		mature miRNA	standard	MIMAT0022292	hsa-miR-548au-3p	hsa-miR-548au-3p
669	hsa-miR-548au-5p	8.55007	7.9379	0.340798	3.51734	14.9971	0.700457	AAAAGUAAUUGCGGUUUUUGC	experimental		mature miRNA	standard	MIMAT0022291	hsa-miR-548au-5p	hsa-miR-548au-5p
670	hsa-miR-548av-3p	0.548595	5.87334	1	1.20954	12.1969	0.82245	AAAACUGCAGUUACUUUUGC	experimental		mature miRNA	standard	MIMAT0022304	hsa-miR-548av-3p	hsa-miR-548av-3p
671	hsa-miR-548av-5p	1.63328	7.06491	0.929344	2.2072	12.3342	0.740897	AAAAGUACUUGCGGAUUU	experimental		mature miRNA	standard	MIMAT0022303	hsa-miR-548av-5p	hsa-miR-548av-5p
672	hsa-miR-548aw	1.74629	6.48432	1	1.53387	15.2245	0.736316	GUGCAAAAGUCAUCACGGUU	experimental		mature miRNA	standard	MIMAT0022471	hsa-miR-548aw	hsa-miR-548aw
673	hsa-miR-548ax	3.78062	7.30602	0.719893	2.13242	13.2799	0.775747	AGAAGUAAUUGCGGUUUUGCCA	experimental		mature miRNA	standard	MIMAT0022474	hsa-miR-548ax	hsa-miR-548ax
674	hsa-miR-548ay-3p	7.80657	7.96358	0.672553	0.0910078	12.5682	1	CAAAACCGCGAUUACUCUUGCA	experimental		mature miRNA	standard	MIMAT0025453	hsa-miR-548ay-3p	hsa-miR-548ay-3p
675	hsa-miR-548ay-5p	3.91037	7.5493	0.744954	1.44986	11.6566	0.903492	AAAAGUAAUUGUGGUUUUUGC	experimental		mature miRNA	standard	MIMAT0025452	hsa-miR-548ay-5p	hsa-miR-548ay-5p
676	hsa-miR-548az-3p	2.71043	7.23198	0.803198	3.7949	11.6445	0.622124	AAAAACUGCAAUCACUUUUGC	experimental		mature miRNA	standard	MIMAT0025457	hsa-miR-548az-3p	hsa-miR-548az-3p
677	hsa-miR-548az-5p	4.81379	10.6581	0.885969	1.25739	11.1431	0.722271	CAAAAGUGAUUGUGGUUUUUGC	experimental		mature miRNA	standard	MIMAT0025456	hsa-miR-548az-5p	hsa-miR-548az-5p
678	hsa-miR-549a	3.77551	8.06449	0.696958	10.7614	13.0395	0.388315	UGACAACUAUGGAUGAGCUCU	experimental		mature miRNA	standard	MIMAT0003333	hsa-miR-549a	hsa-miR-549a
679	hsa-miR-550a-3-5p	5.47684	6.5639	0.455654	11.0306	16.7194	0.437439	AGUGCCUGAGGGAGUAAGAG	experimental		mature miRNA	standard	MIMAT0020925	hsa-miR-550a-3-5p	hsa-miR-550a-3-5p
680	hsa-miR-550a-3p	4.61297	7.15942	0.544151	13.9855	12.9023	0.336092	UGUCUUACUCCCUCAGGCACAU	experimental		mature miRNA	standard	MIMAT0003257	hsa-miR-550a-3p	hsa-miR-550a-3p
681	hsa-miR-550a-5p	2.18903	6.62071	0.788235	16.406	36.4692	0.546024	AGUGCCUGAGGGAGUAAGAGCCC	experimental		mature miRNA	standard	MIMAT0004800	hsa-miR-550a-5p	hsa-miR-550a-5p
682	hsa-miR-550b-2-5p	0.706604	7.06802	0.970827	5.36875	12.5608	0.515854	AUGUGCCUGAGGGAGUAAGACA	experimental		mature miRNA	standard	MIMAT0022737	hsa-miR-550b-2-5p	hsa-miR-550b-2-5p
683	hsa-miR-550b-3p	3.9311	7.04485	0.567382	12.1411	14.4354	0.346107	UCUUACUCCCUCAGGCACUG	experimental		mature miRNA	standard	MIMAT0018445	hsa-miR-550b-3p	hsa-miR-550b-3p
684	hsa-miR-551a	3.46775	8.15369	0.821252	7.17183	18.314	0.757194	GCGACCCACUCUUGGUUUCCA	experimental		mature miRNA	standard	MIMAT0003214	hsa-miR-551a	hsa-miR-551a
685	hsa-miR-551b-3p	32.1645	13.6123	0.0163852	32.4357	17.3908	0.135736	GCGACCCAUACUUGGUUUCAG	experimental		mature miRNA	standard	MIMAT0003233	hsa-miR-551b-3p	hsa-miR-551b-3p
686	hsa-miR-551b-5p	1.29823	9.37189	1	1.45169	15.7707	0.978102	GAAAUCAAGCGUGGGUGAGACC	experimental		mature miRNA	standard	MIMAT0004794	hsa-miR-551b-5p	hsa-miR-551b-5p
687	hsa-miR-552-3p	0.0380718	7.3189	1	0.00262661	16.3741	1	AACAGGUGACUGGUUAGACAA	experimental		mature miRNA	standard	MIMAT0003215	hsa-miR-552-3p	hsa-miR-552-3p
688	hsa-miR-552-5p	0.0380718	6.72873	1	0.00262661	14.453	1	GUUUAACCUUUUGCCUGUUGG	experimental		mature miRNA	standard	MIMAT0026615	hsa-miR-552-5p	hsa-miR-552-5p
689	hsa-miR-553	0.0380718	7.25958	1	0.0137897	14.7974	1	AAAACGGUGAGAUUUUGUUUU	experimental		mature miRNA	standard	MIMAT0003216	hsa-miR-553	hsa-miR-553
690	hsa-miR-554	0.0380718	6.68666	1	0.366961	14.7318	1	GCUAGUCCUGACUCAGCCAGU	experimental		mature miRNA	standard	MIMAT0003217	hsa-miR-554	hsa-miR-554
691	hsa-miR-555	0.826778	7.56971	1	0.209271	13.5472	1	AGGGUAAGCUGAACCUCUGAU	experimental		mature miRNA	standard	MIMAT0003219	hsa-miR-555	hsa-miR-555
692	hsa-miR-556-3p	0.0380718	6.34255	1	0.00262661	15.0762	1	AUAUUACCAUUAGCUCAUCUUU	experimental		mature miRNA	standard	MIMAT0004793	hsa-miR-556-3p	hsa-miR-556-3p
693	hsa-miR-556-5p	0.426076	6.54503	1	0.00262661	14.8408	1	GAUGAGCUCAUUGUAAUAUGAG	experimental		mature miRNA	standard	MIMAT0003220	hsa-miR-556-5p	hsa-miR-556-5p
694	hsa-miR-557	1.05828	7.26857	1	3.26344	26.9981	0.812383	GUUUGCACGGGUGGGCCUUGUCU	experimental		mature miRNA	standard	MIMAT0003221	hsa-miR-557	hsa-miR-557
695	hsa-miR-558	2.01077	7.5622	0.937404	0.232659	11.8228	1	UGAGCUGCUGUACCAAAAU	experimental		mature miRNA	standard	MIMAT0003222	hsa-miR-558	hsa-miR-558
696	hsa-miR-559	0.810794	8.05621	1	0.00262661	12.4749	1	UAAAGUAAAUAUGCACCAAAA	experimental		mature miRNA	standard	MIMAT0003223	hsa-miR-559	hsa-miR-559
697	hsa-miR-561-3p	0.426076	6.71944	1	0.0050937	13.905	1	CAAAGUUUAAGAUCCUUGAAGU	experimental		mature miRNA	standard	MIMAT0003225	hsa-miR-561-3p	hsa-miR-561-3p
698	hsa-miR-561-5p	1.79444	7.4446	1	0.124326	13.864	1	AUCAAGGAUCUUAAACUUUGCC	experimental		mature miRNA	standard	MIMAT0022706	hsa-miR-561-5p	hsa-miR-561-5p
699	hsa-miR-562	0.552982	6.31979	1	0.00262661	11.0119	1	AAAGUAGCUGUACCAUUUGC	experimental		mature miRNA	standard	MIMAT0003226	hsa-miR-562	hsa-miR-562
700	hsa-miR-563	4.52433	10.0274	0.722509	3.0027	15.4647	0.725229	AGGUUGACAUACGUUUCCC	experimental		mature miRNA	standard	MIMAT0003227	hsa-miR-563	hsa-miR-563
701	hsa-miR-564	9.92298	8.84758	0.264677	14.959	20.8806	0.49557	AGGCACGGUGUCAGCAGGC	experimental		mature miRNA	standard	MIMAT0003228	hsa-miR-564	hsa-miR-564
702	hsa-miR-566	3.31308	7.93066	0.975836	0.00388341	12.5292	1	GGGCGCCUGUGAUCCCAAC	experimental		mature miRNA	standard	MIMAT0003230	hsa-miR-566	hsa-miR-566
703	hsa-miR-567	0.892855	6.59359	1	0.32977	15.2382	0.881697	AGUAUGUUCUUCCAGGACAGAAC	experimental		mature miRNA	standard	MIMAT0003231	hsa-miR-567	hsa-miR-567
704	hsa-miR-568	10.1755	7.86985	0.261327	4.60035	15.4568	0.681511	AUGUAUAAAUGUAUACACAC	experimental		mature miRNA	standard	MIMAT0003232	hsa-miR-568	hsa-miR-568
705	hsa-miR-569	0.0612207	7.38506	1	0.00262661	16.3994	1	AGUUAAUGAAUCCUGGAAAGU	experimental		mature miRNA	standard	MIMAT0003234	hsa-miR-569	hsa-miR-569
706	hsa-miR-570-3p	1.92805	7.44321	0.907737	1.32371	15.4209	0.838096	CGAAAACAGCAAUUACCUUUGC	experimental		mature miRNA	standard	MIMAT0003235	hsa-miR-570-3p	hsa-miR-570-3p
707	hsa-miR-571	1.04474	6.39736	1	0.00262661	13.4881	1	UGAGUUGGCCAUCUGAGUGAG	experimental		mature miRNA	standard	MIMAT0003236	hsa-miR-571	hsa-miR-571
708	hsa-miR-572	21.663	10.578	0.0463153	17.4167	16.162	0.291945	GUCCGCUCGGCGGUGGCCCA	experimental		mature miRNA	standard	MIMAT0003237	hsa-miR-572	hsa-miR-572
709	hsa-miR-573	1.83545	6.66742	0.910155	0.0037268	12.4527	1	CUGAAGUGAUGUGUAACUGAUCAG	experimental		mature miRNA	standard	MIMAT0003238	hsa-miR-573	hsa-miR-573
710	hsa-miR-574-3p	238.645	32.9244	1.50338e-13	193.84	34.9452	8.00971e-06	CACGCUCAUGCACACACCCACA	experimental		mature miRNA	standard	MIMAT0003239	hsa-miR-574-3p	hsa-miR-574-3p
711	hsa-miR-574-5p	49.0206	17.0695	0.00140429	45.9094	21.5902	0.0264677	UGAGUGUGUGUGUGUGAGUGUGU	experimental		mature miRNA	standard	MIMAT0004795	hsa-miR-574-5p	hsa-miR-574-5p
712	hsa-miR-575	9.992	10.1056	0.652119	0.00444463	17.6937	1	GAGCCAGUUGGACAGGAGC	experimental		mature miRNA	standard	MIMAT0003240	hsa-miR-575	hsa-miR-575
713	hsa-miR-576-3p	1.17558	7.26049	1	0.00262661	17.7337	1	AAGAUGUGGAAAAAUUGGAAUC	experimental		mature miRNA	standard	MIMAT0004796	hsa-miR-576-3p	hsa-miR-576-3p
714	hsa-miR-576-5p	6.88418	8.84711	0.748485	0.0668525	15.3142	1	AUUCUAAUUUCUCCACGUCUUU	experimental		mature miRNA	standard	MIMAT0003241	hsa-miR-576-5p	hsa-miR-576-5p
715	hsa-miR-577	0.584708	8.35987	1	0.00262661	15.2172	1	UAGAUAAAAUAUUGGUACCUG	experimental		mature miRNA	standard	MIMAT0003242	hsa-miR-577	hsa-miR-577
716	hsa-miR-578	0.0380718	7.42153	1	0.00262661	13.9606	1	CUUCUUGUGCUCUAGGAUUGU	experimental		mature miRNA	standard	MIMAT0003243	hsa-miR-578	hsa-miR-578
717	hsa-miR-579-3p	0.0380718	8.30315	1	0.00262661	13.4989	1	UUCAUUUGGUAUAAACCGCGAUU	experimental		mature miRNA	standard	MIMAT0003244	hsa-miR-579-3p	hsa-miR-579-3p
718	hsa-miR-579-5p	0.0380718	6.7463	1	0.0400559	13.7633	1	UCGCGGUUUGUGCCAGAUGACG	experimental		mature miRNA	standard	MIMAT0026616	hsa-miR-579-5p	hsa-miR-579-5p
719	hsa-miR-580-3p	1.83678	7.52878	1	0.00262661	14.9351	1	UUGAGAAUGAUGAAUCAUUAGG	experimental		mature miRNA	standard	MIMAT0003245	hsa-miR-580-3p	hsa-miR-580-3p
720	hsa-miR-580-5p	3.07351	9.54086	0.917292	0.00349968	11.9394	1	UAAUGAUUCAUCAGACUCAGAU	experimental		mature miRNA	standard	MIMAT0026617	hsa-miR-580-5p	hsa-miR-580-5p
721	hsa-miR-581	0.0380718	7.01576	1	0.00262661	13.8605	1	UCUUGUGUUCUCUAGAUCAGU	experimental		mature miRNA	standard	MIMAT0003246	hsa-miR-581	hsa-miR-581
722	hsa-miR-582-3p	4.8314	10.5976	1	0.00262661	15.3989	1	UAACUGGUUGAACAACUGAACC	experimental		mature miRNA	standard	MIMAT0004797	hsa-miR-582-3p	hsa-miR-582-3p
723	hsa-miR-582-5p	3.47504	9.69944	1	0.00262661	14.295	1	UUACAGUUGUUCAACCAGUUACU	experimental		mature miRNA	standard	MIMAT0003247	hsa-miR-582-5p	hsa-miR-582-5p
724	hsa-miR-583	2.16848	7.44295	1	0.585028	17.987	1	CAAAGAGGAAGGUCCCAUUAC	experimental		mature miRNA	standard	MIMAT0003248	hsa-miR-583	hsa-miR-583
725	hsa-miR-584-3p	0.0380718	6.77437	1	0.00262661	11.9592	1	UCAGUUCCAGGCCAACCAGGCU	experimental		mature miRNA	standard	MIMAT0022708	hsa-miR-584-3p	hsa-miR-584-3p
726	hsa-miR-584-5p	2.9036	7.16226	0.772308	1.70667	13.3665	0.897491	UUAUGGUUUGCCUGGGACUGAG	experimental		mature miRNA	standard	MIMAT0003249	hsa-miR-584-5p	hsa-miR-584-5p
727	hsa-miR-585-3p	1.14108	6.60265	0.971783	0.257267	12.819	1	UGGGCGUAUCUGUAUGCUA	experimental		mature miRNA	standard	MIMAT0003250	hsa-miR-585-3p	hsa-miR-585-3p
728	hsa-miR-585-5p	3.06078	6.65234	0.753641	5.40259	13.9529	0.617889	CUAGCACACAGAUACGCCCAGA	experimental		mature miRNA	standard	MIMAT0026618	hsa-miR-585-5p	hsa-miR-585-5p
729	hsa-miR-586	2.63768	6.36528	0.835891	3.48206	12.613	0.719555	UAUGCAUUGUAUUUUUAGGUCC	experimental		mature miRNA	standard	MIMAT0003252	hsa-miR-586	hsa-miR-586
730	hsa-miR-587	3.96205	7.09663	0.70553	2.7391	14.5478	0.769649	UUUCCAUAGGUGAUGAGUCAC	experimental		mature miRNA	standard	MIMAT0003253	hsa-miR-587	hsa-miR-587
731	hsa-miR-588	0.90257	5.7066	1	0.0301926	12.8236	1	UUGGCCACAAUGGGUUAGAAC	experimental		mature miRNA	standard	MIMAT0003255	hsa-miR-588	hsa-miR-588
732	hsa-miR-589-3p	3.04182	7.93787	0.834247	3.18037	13.1624	0.740836	UCAGAACAAAUGCCGGUUCCCAGA	experimental		mature miRNA	standard	MIMAT0003256	hsa-miR-589-3p	hsa-miR-589-3p
733	hsa-miR-589-5p	2.37762	8.19516	0.94744	0.64125	15.0601	0.951456	UGAGAACCACGUCUGCUCUGAG	experimental		mature miRNA	standard	MIMAT0004799	hsa-miR-589-5p	hsa-miR-589-5p
734	hsa-miR-590-3p	5.94879	7.5667	0.548725	4.22163	13.7245	0.657245	UAAUUUUAUGUAUAAGCUAGU	experimental		mature miRNA	standard	MIMAT0004801	hsa-miR-590-3p	hsa-miR-590-3p
735	hsa-miR-590-5p	4.58791	9.00586	0.636045	8.36014	14.0935	0.532651	GAGCUUAUUCAUAAAAGUGCAG	experimental		mature miRNA	standard	MIMAT0003258	hsa-miR-590-5p	hsa-miR-590-5p
736	hsa-miR-591	2.83712	6.80341	0.766589	2.71934	13.2526	0.771534	AGACCAUGGGUUCUCAUUGU	experimental		mature miRNA	standard	MIMAT0003259	hsa-miR-591	hsa-miR-591
737	hsa-miR-592	1.33781	7.05217	1	1.60995	11.7828	0.75	UUGUGUCAAUAUGCGAUGAUGU	experimental		mature miRNA	standard	MIMAT0003260	hsa-miR-592	hsa-miR-592
738	hsa-miR-593-3p	2.22209	7.45772	0.832686	0.719744	14.4449	0.970541	UGUCUCUGCUGGGGUUUCU	experimental		mature miRNA	standard	MIMAT0004802	hsa-miR-593-3p	hsa-miR-593-3p
739	hsa-miR-593-5p	2.62212	8.36211	0.801705	3.33977	14.7471	0.749389	AGGCACCAGCCAGGCAUUGCUCAGC	experimental		mature miRNA	standard	MIMAT0003261	hsa-miR-593-5p	hsa-miR-593-5p
740	hsa-miR-595	3.96552	8.00359	0.721031	9.40045	13.3708	0.462423	GAAGUGUGCCGUGGUGUGUCU	experimental		mature miRNA	standard	MIMAT0003263	hsa-miR-595	hsa-miR-595
741	hsa-miR-596	2.90755	7.31532	0.775449	4.95926	15.275	0.668994	AAGCCUGCCCGGCUCCUCGGG	experimental		mature miRNA	standard	MIMAT0003264	hsa-miR-596	hsa-miR-596
742	hsa-miR-597-3p	0.116063	6.94903	1	2.19183	17.0462	0.890378	UGGUUCUCUUGUGGCUCAAGCGU	experimental		mature miRNA	standard	MIMAT0026619	hsa-miR-597-3p	hsa-miR-597-3p
743	hsa-miR-597-5p	0.0305856	8.04301	1	0.147894	14.6851	1	UGUGUCACUCGAUGACCACUGU	experimental		mature miRNA	standard	MIMAT0003265	hsa-miR-597-5p	hsa-miR-597-5p
744	hsa-miR-598-3p	10.9352	9.26442	0.328986	4.85076	17.1663	0.785224	UACGUCAUCGUUGUCAUCGUCA	experimental		mature miRNA	standard	MIMAT0003266	hsa-miR-598-3p	hsa-miR-598-3p
745	hsa-miR-598-5p	1.60373	7.60076	1	0.914437	14.6478	0.99797	GCGGUGAUCCCGAUGGUGUGAGC	experimental		mature miRNA	standard	MIMAT0026620	hsa-miR-598-5p	hsa-miR-598-5p
746	hsa-miR-599	1.95384	7.73179	1	0.138554	15.6303	1	GUUGUGUCAGUUUAUCAAAC	experimental		mature miRNA	standard	MIMAT0003267	hsa-miR-599	hsa-miR-599
747	hsa-miR-600	0.0219187	7.59972	1	1.6903	15.4261	0.903158	ACUUACAGACAAGAGCCUUGCUC	experimental		mature miRNA	standard	MIMAT0003268	hsa-miR-600	hsa-miR-600
748	hsa-miR-601	2.06928	7.9746	0.908835	3.72162	13.8415	0.621656	UGGUCUAGGAUUGUUGGAGGAG	experimental		mature miRNA	standard	MIMAT0003269	hsa-miR-601	hsa-miR-601
749	hsa-miR-602	2.45587	7.4056	0.816899	3.35373	13.5357	0.71413	GACACGGGCGACAGCUGCGGCCC	experimental		mature miRNA	standard	MIMAT0003270	hsa-miR-602	hsa-miR-602
750	hsa-miR-603	4.31851	9.5705	1	0.0222182	13.3323	1	CACACACUGCAAUUACUUUUGC	experimental		mature miRNA	standard	MIMAT0003271	hsa-miR-603	hsa-miR-603
751	hsa-miR-604	0.781829	6.43574	1	0.199391	13.0854	0.900459	AGGCUGCGGAAUUCAGGAC	experimental		mature miRNA	standard	MIMAT0003272	hsa-miR-604	hsa-miR-604
752	hsa-miR-605-3p	2.64597	11.0151	0.891374	2.51259	13.3576	0.732774	AGAAGGCACUAUGAGAUUUAGA	experimental		mature miRNA	standard	MIMAT0026621	hsa-miR-605-3p	hsa-miR-605-3p
753	hsa-miR-605-5p	0.445046	7.47515	1	4.29163	14.3494	0.544348	UAAAUCCCAUGGUGCCUUCUCCU	experimental		mature miRNA	standard	MIMAT0003273	hsa-miR-605-5p	hsa-miR-605-5p
754	hsa-miR-606	0.657155	7.04164	1	1.4103	14.8378	0.81318	AAACUACUGAAAAUCAAAGAU	experimental		mature miRNA	standard	MIMAT0003274	hsa-miR-606	hsa-miR-606
755	hsa-miR-607	0.56745	7.70269	1	3.33516	12.3424	0.57018	GUUCAAAUCCAGAUCUAUAAC	experimental		mature miRNA	standard	MIMAT0003275	hsa-miR-607	hsa-miR-607
756	hsa-miR-608	4.05792	8.24633	0.763846	1.56337	13.231	0.85475	AGGGGUGGUGUUGGGACAGCUCCGU	experimental		mature miRNA	standard	MIMAT0003276	hsa-miR-608	hsa-miR-608
757	hsa-miR-609	5.10847	6.32405	0.559895	3.26771	12.5361	0.676066	AGGGUGUUUCUCUCAUCUCU	experimental		mature miRNA	standard	MIMAT0003277	hsa-miR-609	hsa-miR-609
758	hsa-miR-610	11.598	7.64538	0.472738	0.882786	11.2267	0.794778	UGAGCUAAAUGUGUGCUGGGA	experimental		mature miRNA	standard	MIMAT0003278	hsa-miR-610	hsa-miR-610
759	hsa-miR-611	4.29116	6.92317	0.634982	7.39049	11.8886	0.499904	GCGAGGACCCCUCGGGGUCUGAC	experimental		mature miRNA	standard	MIMAT0003279	hsa-miR-611	hsa-miR-611
760	hsa-miR-612	24.861	8.90637	0.00580618	14.3378	14.4954	0.453074	GCUGGGCAGGGCUUCUGAGCUCCUU	experimental		mature miRNA	standard	MIMAT0003280	hsa-miR-612	hsa-miR-612
761	hsa-miR-613	3.70188	8.86206	0.883027	2.07835	13.5185	0.714499	AGGAAUGUUCCUUCUUUGCC	experimental		mature miRNA	standard	MIMAT0003281	hsa-miR-613	hsa-miR-613
762	hsa-miR-614	2.83113	7.45776	1	0.00377824	15.3092	0.978333	GAACGCCUGUUCUUGCCAGGUGG	experimental		mature miRNA	standard	MIMAT0003282	hsa-miR-614	hsa-miR-614
763	hsa-miR-615-3p	17.427	9.12455	0.0577409	13.1047	16.884	0.472545	UCCGAGCCUGGGUCUCCCUCUU	experimental		mature miRNA	standard	MIMAT0003283	hsa-miR-615-3p	hsa-miR-615-3p
764	hsa-miR-615-5p	91.041	31.3752	0.00201724	111.195	58.4734	0.0244741	GGGGGUCCCCGGUGCUCGGAUC	experimental		mature miRNA	standard	MIMAT0004804	hsa-miR-615-5p	hsa-miR-615-5p
765	hsa-miR-616-3p	5.236	7.62817	0.568156	4.21459	13.2296	0.688045	AGUCAUUGGAGGGUUUGAGCAG	experimental		mature miRNA	standard	MIMAT0004805	hsa-miR-616-3p	hsa-miR-616-3p
766	hsa-miR-616-5p	6.27918	6.75886	0.517073	1.42598	13.2349	0.784025	ACUCAAAACCCUUCAGUGACUU	experimental		mature miRNA	standard	MIMAT0003284	hsa-miR-616-5p	hsa-miR-616-5p
767	hsa-miR-617	44.9725	18.935	0.0181851	8.09798	14.8068	0.539473	AGACUUCCCAUUUGAAGGUGGC	experimental		mature miRNA	standard	MIMAT0003286	hsa-miR-617	hsa-miR-617
768	hsa-miR-618	3.43766	6.85828	0.83187	0.710956	11.8389	0.937409	AAACUCUACUUGUCCUUCUGAGU	experimental		mature miRNA	standard	MIMAT0003287	hsa-miR-618	hsa-miR-618
769	hsa-miR-619-3p	3.81244	8.54324	0.857177	0.00369228	11.0689	1	GACCUGGACAUGUUUGUGCCCAGU	experimental		mature miRNA	standard	MIMAT0003288	hsa-miR-619-3p	hsa-miR-619-3p
770	hsa-miR-619-5p	9.64552	9.62694	0.351105	10.3235	15.84	0.464829	GCUGGGAUUACAGGCAUGAGCC	experimental		mature miRNA	standard	MIMAT0026622	hsa-miR-619-5p	hsa-miR-619-5p
771	hsa-miR-620	2.45592	6.27509	0.772325	4.46589	13.1325	0.59721	AUGGAGAUAGAUAUAGAAAU	experimental		mature miRNA	standard	MIMAT0003289	hsa-miR-620	hsa-miR-620
772	hsa-miR-621	4.03188	7.6191	0.720308	0.947091	11.4552	0.82578	GGCUAGCAACAGCGCUUACCU	experimental		mature miRNA	standard	MIMAT0003290	hsa-miR-621	hsa-miR-621
773	hsa-miR-622	1.71283	6.86621	0.870914	4.06208	12.2525	0.610665	ACAGUCUGCUGAGGUUGGAGC	experimental		mature miRNA	standard	MIMAT0003291	hsa-miR-622	hsa-miR-622
774	hsa-miR-623	16.7595	9.34092	0.0719542	16.0914	13.8926	0.278807	AUCCCUUGCAGGGGCUGUUGGGU	experimental		mature miRNA	standard	MIMAT0003292	hsa-miR-623	hsa-miR-623
775	hsa-miR-624-3p	4.26691	6.4275	0.787732	0.885133	14.3809	0.824847	CACAAGGUAUUGGUAUUACCU	experimental		mature miRNA	standard	MIMAT0004807	hsa-miR-624-3p	hsa-miR-624-3p
776	hsa-miR-624-5p	3.89571	6.17141	0.680229	0.714438	12.8239	0.914062	UAGUACCAGUACCUUGUGUUCA	experimental		mature miRNA	standard	MIMAT0003293	hsa-miR-624-5p	hsa-miR-624-5p
777	hsa-miR-625-3p	15.9977	7.39316	0.032458	19.0879	22.8921	0.327996	GACUAUAGAACUUUCCCCCUCA	experimental		mature miRNA	standard	MIMAT0004808	hsa-miR-625-3p	hsa-miR-625-3p
778	hsa-miR-625-5p	29.863	12.3417	0.0111294	29.5678	18.3936	0.236964	AGGGGGAAAGUUCUAUAGUCC	experimental		mature miRNA	standard	MIMAT0003294	hsa-miR-625-5p	hsa-miR-625-5p
779	hsa-miR-626	3.29376	8.3966	0.828082	1.42764	14.4352	0.919381	AGCUGUCUGAAAAUGUCUU	experimental		mature miRNA	standard	MIMAT0003295	hsa-miR-626	hsa-miR-626
780	hsa-miR-627-3p	1.10585	6.32627	1	1.61677	13.9308	0.808683	UCUUUUCUUUGAGACUCACU	experimental		mature miRNA	standard	MIMAT0026623	hsa-miR-627-3p	hsa-miR-627-3p
781	hsa-miR-627-5p	3.59508	6.41944	0.707709	2.47992	13.2112	0.764497	GUGAGUCUCUAAGAAAAGAGGA	experimental		mature miRNA	standard	MIMAT0003296	hsa-miR-627-5p	hsa-miR-627-5p
782	hsa-miR-628-3p	5.40855	11.5471	0.856661	0.293568	11.1985	0.992179	UCUAGUAAGAGUGGCAGUCGA	experimental		mature miRNA	standard	MIMAT0003297	hsa-miR-628-3p	hsa-miR-628-3p
783	hsa-miR-628-5p	7.25505	8.03862	0.444245	2.81188	16.906	0.819273	AUGCUGACAUAUUUACUAGAGG	experimental		mature miRNA	standard	MIMAT0004809	hsa-miR-628-5p	hsa-miR-628-5p
784	hsa-miR-629-3p	9.23238	6.59266	0.236647	4.21176	14.7747	0.737679	GUUCUCCCAACGUAAGCCCAGC	experimental		mature miRNA	standard	MIMAT0003298	hsa-miR-629-3p	hsa-miR-629-3p
785	hsa-miR-629-5p	16.6924	11.2803	0.147467	8.45809	14.9653	0.603708	UGGGUUUACGUUGGGAGAACU	experimental		mature miRNA	standard	MIMAT0004810	hsa-miR-629-5p	hsa-miR-629-5p
786	hsa-miR-630	3.76383	6.91605	0.818365	0.847071	13.8501	0.92128	AGUAUUCUGUACCAGGGAAGGU	experimental		mature miRNA	standard	MIMAT0003299	hsa-miR-630	hsa-miR-630
787	hsa-miR-631	3.92006	9.53992	0.978687	0.382525	12.7335	1	AGACCUGGCCCAGACCUCAGC	experimental		mature miRNA	standard	MIMAT0003300	hsa-miR-631	hsa-miR-631
788	hsa-miR-632	0.541239	8.26284	1	0.39373	13.1001	0.958341	GUGUCUGCUUCCUGUGGGA	experimental		mature miRNA	standard	MIMAT0003302	hsa-miR-632	hsa-miR-632
789	hsa-miR-633	1.92047	7.23107	0.944699	0.0040123	14.5704	1	CUAAUAGUAUCUACCACAAUAAA	experimental		mature miRNA	standard	MIMAT0003303	hsa-miR-633	hsa-miR-633
790	hsa-miR-634	1.95519	7.70905	0.905971	1.88836	16.3565	0.789132	AACCAGCACCCCAACUUUGGAC	experimental		mature miRNA	standard	MIMAT0003304	hsa-miR-634	hsa-miR-634
791	hsa-miR-635	0.400505	7.70774	1	0.00262661	13.2367	1	ACUUGGGCACUGAAACAAUGUCC	experimental		mature miRNA	standard	MIMAT0003305	hsa-miR-635	hsa-miR-635
792	hsa-miR-636	3.69739	7.22957	0.84909	0.705913	11.3258	1	UGUGCUUGCUCGUCCCGCCCGCA	experimental		mature miRNA	standard	MIMAT0003306	hsa-miR-636	hsa-miR-636
793	hsa-miR-637	9.17697	8.88626	0.613505	0.0918826	11.6755	1	ACUGGGGGCUUUCGGGCUCUGCGU	experimental		mature miRNA	standard	MIMAT0003307	hsa-miR-637	hsa-miR-637
794	hsa-miR-638	1415.38	105.21	2.77675e-41	1519.92	105.092	2.86924e-17	AGGGAUCGCGGGCGGGUGGCGGCCU	experimental		mature miRNA	standard	MIMAT0003308	hsa-miR-638	hsa-miR-638
795	hsa-miR-639	3.17302	7.76278	0.830228	1.46003	11.4493	0.903026	AUCGCUGCGGUUGCGAGCGCUGU	experimental		mature miRNA	standard	MIMAT0003309	hsa-miR-639	hsa-miR-639
796	hsa-miR-640	2.58701	6.68267	0.843713	1.64394	13.6743	0.806663	AUGAUCCAGGAACCUGCCUCU	experimental		mature miRNA	standard	MIMAT0003310	hsa-miR-640	hsa-miR-640
797	hsa-miR-641	3.61579	8.08264	0.768833	7.51845	24.6362	0.671476	AAAGACAUAGGAUAGAGUCACCUC	experimental		mature miRNA	standard	MIMAT0003311	hsa-miR-641	hsa-miR-641
798	hsa-miR-642a-3p	4.03731	6.965	0.816601	1.25688	12.8519	0.898898	AGACACAUUUGGAGAGGGAACC	experimental		mature miRNA	standard	MIMAT0020924	hsa-miR-642a-3p	hsa-miR-642a-3p
799	hsa-miR-642a-5p	5.36306	6.61174	0.534761	6.71927	25.6188	0.705202	GUCCCUCUCCAAAUGUGUCUUG	experimental		mature miRNA	standard	MIMAT0003312	hsa-miR-642a-5p	hsa-miR-642a-5p
800	hsa-miR-642b-3p	5.06483	8.7861	0.662302	3.33534	14.458	0.725391	AGACACAUUUGGAGAGGGACCC	experimental		mature miRNA	standard	MIMAT0018444	hsa-miR-642b-3p	hsa-miR-642b-3p
801	hsa-miR-642b-5p	6.1308	7.23699	0.475599	5.92448	14.9627	0.626454	GGUUCCCUCUCCAAAUGUGUCU	experimental		mature miRNA	standard	MIMAT0022736	hsa-miR-642b-5p	hsa-miR-642b-5p
802	hsa-miR-643	2.92684	6.55765	0.738265	4.6033	13.8279	0.736761	ACUUGUAUGCUAGCUCAGGUAG	experimental		mature miRNA	standard	MIMAT0003313	hsa-miR-643	hsa-miR-643
803	hsa-miR-644a	2.35788	7.586	0.999313	1.3551	11.5658	0.816056	AGUGUGGCUUUCUUAGAGC	experimental		mature miRNA	standard	MIMAT0003314	hsa-miR-644a	hsa-miR-644a
804	hsa-miR-645	2.45206	8.07475	0.960232	1.87095	20.5441	0.853373	UCUAGGCUGGUACUGCUGA	experimental		mature miRNA	standard	MIMAT0003315	hsa-miR-645	hsa-miR-645
805	hsa-miR-646	1.571	6.0867	0.90488	1.68965	14.4731	0.804681	AAGCAGCUGCCUCUGAGGC	experimental		mature miRNA	standard	MIMAT0003316	hsa-miR-646	hsa-miR-646
806	hsa-miR-647	3.46765	7.18839	0.789796	1.65497	11.9139	0.806041	GUGGCUGCACUCACUUCCUUC	experimental		mature miRNA	standard	MIMAT0003317	hsa-miR-647	hsa-miR-647
807	hsa-miR-648	3.09521	6.4847	0.744093	1.7861	13.0856	0.794139	AAGUGUGCAGGGCACUGGU	experimental		mature miRNA	standard	MIMAT0003318	hsa-miR-648	hsa-miR-648
808	hsa-miR-649	4.60991	10.3685	0.804154	0.849644	14.8483	0.855618	AAACCUGUGUUGUUCAAGAGUC	experimental		mature miRNA	standard	MIMAT0003319	hsa-miR-649	hsa-miR-649
809	hsa-miR-650	1.61175	7.02765	1	0.623179	17.4417	0.864945	AGGAGGCAGCGCUCUCAGGAC	experimental		mature miRNA	standard	MIMAT0003320	hsa-miR-650	hsa-miR-650
810	hsa-miR-651-3p	2.30031	7.85432	0.882038	4.32639	15.2169	0.68078	AAAGGAAAGUGUAUCCUAAAAG	experimental		mature miRNA	standard	MIMAT0026624	hsa-miR-651-3p	hsa-miR-651-3p
811	hsa-miR-651-5p	2.42156	8.01247	0.84389	8.94439	29.8436	0.625804	UUUAGGAUAAGCUUGACUUUUG	experimental		mature miRNA	standard	MIMAT0003321	hsa-miR-651-5p	hsa-miR-651-5p
812	hsa-miR-652-3p	42.9845	15.652	0.00345186	55.3452	27.2205	0.0503625	AAUGGCGCCACUAGGGUUGUG	experimental		mature miRNA	standard	MIMAT0003322	hsa-miR-652-3p	hsa-miR-652-3p
813	hsa-miR-652-5p	8.14869	9.64584	0.429369	12.5557	16.7194	0.351921	CAACCCUAGGAGAGGGUGCCAUUCA	experimental		mature miRNA	standard	MIMAT0022709	hsa-miR-652-5p	hsa-miR-652-5p
814	hsa-miR-653-3p	2.63251	8.60624	1	2.02212	14.2317	0.718684	UUCACUGGAGUUUGUUUCAAUA	experimental		mature miRNA	standard	MIMAT0026625	hsa-miR-653-3p	hsa-miR-653-3p
815	hsa-miR-653-5p	0.0224077	6.43071	1	1.96911	12.3858	0.691605	GUGUUGAAACAAUCUCUACUG	experimental		mature miRNA	standard	MIMAT0003328	hsa-miR-653-5p	hsa-miR-653-5p
816	hsa-miR-654-3p	9.48719	8.21983	0.299733	8.8087	15.579	0.553603	UAUGUCUGCUGACCAUCACCUU	experimental		mature miRNA	standard	MIMAT0004814	hsa-miR-654-3p	hsa-miR-654-3p
817	hsa-miR-654-5p	3.28533	7.2072	0.796942	9.25606	12.5291	0.474413	UGGUGGGCCGCAGAACAUGUGC	experimental		mature miRNA	standard	MIMAT0003330	hsa-miR-654-5p	hsa-miR-654-5p
818	hsa-miR-655-3p	5.02442	6.45279	0.508824	9.1223	14.8473	0.499264	AUAAUACAUGGUUAACCUCUUU	experimental		mature miRNA	standard	MIMAT0003331	hsa-miR-655-3p	hsa-miR-655-3p
819	hsa-miR-655-5p	3.01827	5.59313	0.678102	4.94752	12.7997	0.631481	AGAGGUUAUCCGUGUUAUGUUC	experimental		mature miRNA	standard	MIMAT0026626	hsa-miR-655-5p	hsa-miR-655-5p
820	hsa-miR-656-3p	6.28925	6.46251	0.400604	11.4874	15.2286	0.385764	AAUAUUAUACAGUCAACCUCU	experimental		mature miRNA	standard	MIMAT0003332	hsa-miR-656-3p	hsa-miR-656-3p
821	hsa-miR-656-5p	2.4268	6.46566	0.768026	8.43704	14.4	0.515974	AGGUUGCCUGUGAGGUGUUCA	experimental		mature miRNA	standard	MIMAT0026627	hsa-miR-656-5p	hsa-miR-656-5p
822	hsa-miR-657	5.25783	7.65932	0.540349	10.9861	15.0543	0.373598	GGCAGGUUCUCACCCUCUCUAGG	experimental		mature miRNA	standard	MIMAT0003335	hsa-miR-657	hsa-miR-657
823	hsa-miR-658	8.77459	8.78436	0.347299	12.2519	15.2033	0.433691	GGCGGAGGGAAGUAGGUCCGUUGGU	experimental		mature miRNA	standard	MIMAT0003336	hsa-miR-658	hsa-miR-658
824	hsa-miR-659-3p	4.37398	7.39911	0.636731	8.43063	12.7632	0.411234	CUUGGUUCAGGGAGGGUCCCCA	experimental		mature miRNA	standard	MIMAT0003337	hsa-miR-659-3p	hsa-miR-659-3p
825	hsa-miR-659-5p	3.90291	7.43639	0.66502	11.0719	15.1782	0.40048	AGGACCUUCCCUGAACCAAGGA	experimental		mature miRNA	standard	MIMAT0022710	hsa-miR-659-5p	hsa-miR-659-5p
826	hsa-miR-660-3p	6.91389	8.8381	0.477607	13.159	13.7394	0.46365	ACCUCCUGUGUGCAUGGAUUA	experimental		mature miRNA	standard	MIMAT0022711	hsa-miR-660-3p	hsa-miR-660-3p
827	hsa-miR-660-5p	31.6514	12.5165	0.00670037	48.9774	18.2779	0.031432	UACCCAUUGCAUAUCGGAGUUG	experimental		mature miRNA	standard	MIMAT0003338	hsa-miR-660-5p	hsa-miR-660-5p
828	hsa-miR-661	2.99754	6.71384	0.698346	11.3202	14.1023	0.359927	UGCCUGGGUCUCUGGCCUGCGCGU	experimental		mature miRNA	standard	MIMAT0003324	hsa-miR-661	hsa-miR-661
829	hsa-miR-662	4.51634	6.42834	0.508866	12.917	13.9505	0.29055	UCCCACGUUGUGGCCCAGCAG	experimental		mature miRNA	standard	MIMAT0003325	hsa-miR-662	hsa-miR-662
830	hsa-miR-663a	119.653	17.3143	2.64779e-14	172.931	29.8657	1.52343e-07	AGGCGGGGCGCCGCGGGACCGC	experimental		mature miRNA	standard	MIMAT0003326	hsa-miR-663a	hsa-miR-663a
831	hsa-miR-663b	2.07123	7.57413	0.763706	12.7843	15.3848	0.259767	GGUGGCCCGGCCGUGCCUGAGG	experimental		mature miRNA	standard	MIMAT0005867	hsa-miR-663b	hsa-miR-663b
832	hsa-miR-664a-3p	25.8907	11.4089	0.0252664	35.0165	21.0761	0.132318	UAUUCAUUUAUCCCCAGCCUACA	experimental		mature miRNA	standard	MIMAT0005949	hsa-miR-664a-3p	hsa-miR-664a-3p
833	hsa-miR-664a-5p	4.21739	10.7354	1	0.653175	13.7158	0.977866	ACUGGCUAGGGAAAAUGAUUGGAU	experimental		mature miRNA	standard	MIMAT0005948	hsa-miR-664a-5p	hsa-miR-664a-5p
834	hsa-miR-664b-3p	9.60207	9.67665	0.401083	11.1309	15.6175	0.494131	UUCAUUUGCCUCCCAGCCUACA	experimental		mature miRNA	standard	MIMAT0022272	hsa-miR-664b-3p	hsa-miR-664b-3p
835	hsa-miR-664b-5p	0.0380718	7.0694	1	0.104075	14.7651	1	UGGGCUAAGGGAGAUGAUUGGGUA	experimental		mature miRNA	standard	MIMAT0022271	hsa-miR-664b-5p	hsa-miR-664b-5p
836	hsa-miR-665	0.0380718	8.16667	1	0.00262661	14.3917	1	ACCAGGAGGCUGAGGCCCCU	experimental		mature miRNA	standard	MIMAT0004952	hsa-miR-665	hsa-miR-665
837	hsa-miR-668-3p	10.8941	9.71042	0.335539	7.16285	16.8149	0.619903	UGUCACUCGGCUCGGCCCACUAC	experimental		mature miRNA	standard	MIMAT0003881	hsa-miR-668-3p	hsa-miR-668-3p
838	hsa-miR-668-5p	0.0380718	6.11518	1	0.750607	15.0074	0.966458	UGCGCCUCGGGUGAGCAUG	experimental		mature miRNA	standard	MIMAT0026636	hsa-miR-668-5p	hsa-miR-668-5p
839	hsa-miR-670-3p	0.0258016	6.25658	1	0.534795	14.977	0.91864	UUUCCUCAUAUUCAUUCAGGA	experimental		mature miRNA	standard	MIMAT0026640	hsa-miR-670-3p	hsa-miR-670-3p
840	hsa-miR-670-5p	3.60684	7.70491	0.957299	0.769508	15.6853	0.998447	GUCCCUGAGUGUAUGUGGUG	experimental		mature miRNA	standard	MIMAT0010357	hsa-miR-670-5p	hsa-miR-670-5p
841	hsa-miR-671-3p	5.34839	7.91801	0.604446	5.46574	18.5512	0.727594	UCCGGUUCUCAGGGCUCCACC	experimental		mature miRNA	standard	MIMAT0004819	hsa-miR-671-3p	hsa-miR-671-3p
842	hsa-miR-671-5p	12.2579	9.03115	0.183055	15.4212	16.2278	0.31594	AGGAAGCCCUGGAGGGGCUGGAG	experimental		mature miRNA	standard	MIMAT0003880	hsa-miR-671-5p	hsa-miR-671-5p
843	hsa-miR-675-3p	5.79857	6.68668	0.501335	3.57353	15.1656	0.772129	CUGUAUGCCCUCACCGCUCA	experimental		mature miRNA	standard	MIMAT0006790	hsa-miR-675-3p	hsa-miR-675-3p
844	hsa-miR-675-5p	0.0380718	6.64079	1	0.174753	11.8734	1	UGGUGCGGAGAGGGCCCACAGUG	experimental		mature miRNA	standard	MIMAT0004284	hsa-miR-675-5p	hsa-miR-675-5p
845	hsa-miR-676-3p	0.853658	7.32412	1	0.00262661	14.1183	1	CUGUCCUAAGGUUGUUGAGUU	experimental		mature miRNA	standard	MIMAT0018204	hsa-miR-676-3p	hsa-miR-676-3p
846	hsa-miR-676-5p	0.0380718	6.16495	1	0.00262661	13.1628	0.990204	UCUUCAACCUCAGGACUUGCA	experimental		mature miRNA	standard	MIMAT0018203	hsa-miR-676-5p	hsa-miR-676-5p
847	hsa-miR-708-3p	3.40428	7.99831	0.88996	0.00421218	11.9499	1	CAACUAGACUGUGAGCUUCUAG	experimental		mature miRNA	standard	MIMAT0004927	hsa-miR-708-3p	hsa-miR-708-3p
848	hsa-miR-708-5p	5.67904	7.92308	0.768085	0.0686491	14.5979	1	AAGGAGCUUACAAUCUAGCUGGG	experimental		mature miRNA	standard	MIMAT0004926	hsa-miR-708-5p	hsa-miR-708-5p
849	hsa-miR-711	2.111	7.64061	1	0.00262661	13.3978	1	GGGACCCAGGGAGAGACGUAAG	experimental		mature miRNA	standard	MIMAT0012734	hsa-miR-711	hsa-miR-711
850	hsa-miR-718	3.32319	7.95692	0.730117	22.4588	52.3495	0.593659	CUUCCGCCCCGCCGGGCGUCG	experimental		mature miRNA	standard	MIMAT0012735	hsa-miR-718	hsa-miR-718
851	hsa-miR-744-3p	3.36642	8.99322	0.856163	4.15349	16.4918	0.580228	CUGUUGCCACUAACCUCAACCU	experimental		mature miRNA	standard	MIMAT0004946	hsa-miR-744-3p	hsa-miR-744-3p
852	hsa-miR-744-5p	27.943	10.1695	0.00354431	40.0822	22.767	0.0549387	UGCGGGGCUAGGGCUAACAGCA	experimental		mature miRNA	standard	MIMAT0004945	hsa-miR-744-5p	hsa-miR-744-5p
853	hsa-miR-758-3p	1.15397	7.47163	0.8966	4.35609	13.2257	0.600655	UUUGUGACCUGGUCCACUAACC	experimental		mature miRNA	standard	MIMAT0003879	hsa-miR-758-3p	hsa-miR-758-3p
854	hsa-miR-758-5p	0.607451	7.63106	0.915902	3.83797	15.1309	0.682224	GAUGGUUGACCAGAGAGCACAC	experimental		mature miRNA	standard	MIMAT0022929	hsa-miR-758-5p	hsa-miR-758-5p
855	hsa-miR-759	3.53467	6.58414	0.625564	4.16747	12.66	0.627668	GCAGAGUGCAAACAAUUUUGAC	experimental		mature miRNA	standard	MIMAT0010497	hsa-miR-759	hsa-miR-759
856	hsa-miR-760	0.0652217	6.04642	1	4.39736	16.6203	0.624408	CGGCUCUGGGUCUGUGGGGA	experimental		mature miRNA	standard	MIMAT0004957	hsa-miR-760	hsa-miR-760
857	hsa-miR-761	0.0380718	7.41821	1	0.821008	15.3914	0.895994	GCAGCAGGGUGAAACUGACACA	experimental		mature miRNA	standard	MIMAT0010364	hsa-miR-761	hsa-miR-761
858	hsa-miR-762	363.943	35.1376	1.4424e-26	422.285	62.8524	5.11751e-09	GGGGCUGGGGCCGGGGCCGAGC	experimental		mature miRNA	standard	MIMAT0010313	hsa-miR-762	hsa-miR-762
859	hsa-miR-764	0.204333	6.24164	1	2.99677	15.3323	0.679287	GCAGGUGCUCACUUGUCCUCCU	experimental		mature miRNA	standard	MIMAT0010367	hsa-miR-764	hsa-miR-764
860	hsa-miR-765	14.64	9.8343	0.1418	16.1177	16.1826	0.333538	UGGAGGAGAAGGAAGGUGAUG	experimental		mature miRNA	standard	MIMAT0003945	hsa-miR-765	hsa-miR-765
861	hsa-miR-766-3p	11.3851	9.60904	0.239788	15.4702	14.3975	0.315842	ACUCCAGCCCCACAGCCUCAGC	experimental		mature miRNA	standard	MIMAT0003888	hsa-miR-766-3p	hsa-miR-766-3p
862	hsa-miR-766-5p	2.25747	7.72455	0.848103	3.46596	13.2094	0.689356	AGGAGGAAUUGGUGCUGGUCUU	experimental		mature miRNA	standard	MIMAT0022714	hsa-miR-766-5p	hsa-miR-766-5p
863	hsa-miR-767-3p	4.18241	7.13369	0.626436	5.23419	13.4232	0.61905	UCUGCUCAUACCCCAUGGUUUCU	experimental		mature miRNA	standard	MIMAT0003883	hsa-miR-767-3p	hsa-miR-767-3p
864	hsa-miR-767-5p	0.648484	6.29391	1	0.105947	12.7123	1	UGCACCAUGGUUGUCUGAGCAUG	experimental		mature miRNA	standard	MIMAT0003882	hsa-miR-767-5p	hsa-miR-767-5p
865	hsa-miR-769-3p	3.17771	6.82973	0.769114	0.817228	13.2906	0.847891	CUGGGAUCUCCGGGGUCUUGGUU	experimental		mature miRNA	standard	MIMAT0003887	hsa-miR-769-3p	hsa-miR-769-3p
866	hsa-miR-769-5p	3.6433	7.93737	0.761884	3.72307	14.4131	0.716796	UGAGACCUCUGGGUUCUGAGCU	experimental		mature miRNA	standard	MIMAT0003886	hsa-miR-769-5p	hsa-miR-769-5p
867	hsa-miR-770-5p	4.46609	8.04992	0.626689	3.11524	13.5165	0.72771	UCCAGUACCACGUGUCAGGGCCA	experimental		mature miRNA	standard	MIMAT0003948	hsa-miR-770-5p	hsa-miR-770-5p
868	hsa-miR-802	0.431744	6.52868	1	1.45133	13.281	0.714715	CAGUAACAAAGAUUCAUCCUUGU	experimental		mature miRNA	standard	MIMAT0004185	hsa-miR-802	hsa-miR-802
869	hsa-miR-873-3p	2.49748	6.92565	1	0.974705	13.4329	0.840141	GGAGACUGAUGAGUUCCCGGGA	experimental		mature miRNA	standard	MIMAT0022717	hsa-miR-873-3p	hsa-miR-873-3p
870	hsa-miR-873-5p	3.90946	6.95598	0.744562	0.128211	13.3249	0.889226	GCAGGAACUUGUGAGUCUCCU	experimental		mature miRNA	standard	MIMAT0004953	hsa-miR-873-5p	hsa-miR-873-5p
871	hsa-miR-874-3p	4.12595	9.13319	0.916936	0.312116	11.1772	0.867328	CUGCCCUGGCCCGAGGGACCGA	experimental		mature miRNA	standard	MIMAT0004911	hsa-miR-874-3p	hsa-miR-874-3p
872	hsa-miR-874-5p	1.6517	6.07972	0.997166	1.8512	13.6323	0.685763	CGGCCCCACGCACCAGGGUAAGA	experimental		mature miRNA	standard	MIMAT0026718	hsa-miR-874-5p	hsa-miR-874-5p
873	hsa-miR-875-3p	1.2132	5.43334	0.961564	2.10017	14.7336	0.717983	CCUGGAAACACUGAGGUUGUG	experimental		mature miRNA	standard	MIMAT0004923	hsa-miR-875-3p	hsa-miR-875-3p
874	hsa-miR-875-5p	0.0222453	6.67207	1	1.37728	13.9788	0.747912	UAUACCUCAGUUUUAUCAGGUG	experimental		mature miRNA	standard	MIMAT0004922	hsa-miR-875-5p	hsa-miR-875-5p
875	hsa-miR-876-3p	6.43227	9.38438	0.578996	2.22558	15.5541	0.772388	UGGUGGUUUACAAAGUAAUUCA	experimental		mature miRNA	standard	MIMAT0004925	hsa-miR-876-3p	hsa-miR-876-3p
876	hsa-miR-876-5p	2.64237	7.26872	0.824303	1.30029	15.5898	0.846782	UGGAUUUCUUUGUGAAUCACCA	experimental		mature miRNA	standard	MIMAT0004924	hsa-miR-876-5p	hsa-miR-876-5p
877	hsa-miR-877-3p	5.48988	7.64265	0.589322	1.32719	13.3009	0.806691	UCCUCUUCUCCCUCCUCCCAG	experimental		mature miRNA	standard	MIMAT0004950	hsa-miR-877-3p	hsa-miR-877-3p
878	hsa-miR-877-5p	4.82575	8.35052	0.60272	9.2889	13.194	0.472127	GUAGAGGAGAUGGCGCAGGG	experimental		mature miRNA	standard	MIMAT0004949	hsa-miR-877-5p	hsa-miR-877-5p
879	hsa-miR-885-3p	3.65749	6.98723	0.674641	3.76388	15.8632	0.732759	AGGCAGCGGGGUGUAGUGGAUA	experimental		mature miRNA	standard	MIMAT0004948	hsa-miR-885-3p	hsa-miR-885-3p
880	hsa-miR-885-5p	15.4054	11.3627	0.180945	13.2431	15.1543	0.376688	UCCAUUACACUACCCUGCCUCU	experimental		mature miRNA	standard	MIMAT0004947	hsa-miR-885-5p	hsa-miR-885-5p
881	hsa-miR-887-3p	2.61933	9.10904	1	0.0687656	16.1181	1	GUGAACGGGCGCCAUCCCGAGG	experimental		mature miRNA	standard	MIMAT0004951	hsa-miR-887-3p	hsa-miR-887-3p
882	hsa-miR-887-5p	0.0380718	7.00392	1	0.0183914	13.7774	1	CUUGGGAGCCCUGUUAGACUC	experimental		mature miRNA	standard	MIMAT0026720	hsa-miR-887-5p	hsa-miR-887-5p
883	hsa-miR-888-3p	1.52799	7.45046	1	0.0562258	14.2538	0.995722	GACUGACACCUCUUUGGGUGAA	experimental		mature miRNA	standard	MIMAT0004917	hsa-miR-888-3p	hsa-miR-888-3p
884	hsa-miR-888-5p	0.0380718	7.55491	1	0.00262661	13.7926	1	UACUCAAAAAGCUGUCAGUCA	experimental		mature miRNA	standard	MIMAT0004916	hsa-miR-888-5p	hsa-miR-888-5p
885	hsa-miR-889-3p	2.6961	7.57579	0.79884	2.28773	14.9064	0.753628	UUAAUAUCGGACAACCAUUGU	experimental		mature miRNA	standard	MIMAT0004921	hsa-miR-889-3p	hsa-miR-889-3p
886	hsa-miR-889-5p	0.0970679	7.32857	1	0.0947965	14.4355	0.9715	AAUGGCUGUCCGUAGUAUGGUC	experimental		mature miRNA	standard	MIMAT0026719	hsa-miR-889-5p	hsa-miR-889-5p
887	hsa-miR-890	0.347138	6.98092	1	0.166837	13.7027	1	UACUUGGAAAGGCAUCAGUUG	experimental		mature miRNA	standard	MIMAT0004912	hsa-miR-890	hsa-miR-890
888	hsa-miR-891a-3p	0.0230978	6.47754	1	0.906274	15.1161	0.876876	AGUGGCACAUGUUUGUUGUGAG	experimental		mature miRNA	standard	MIMAT0026717	hsa-miR-891a-3p	hsa-miR-891a-3p
889	hsa-miR-891a-5p	3.93395	7.51634	0.702976	6.26357	22.2198	0.608572	UGCAACGAACCUGAGCCACUGA	experimental		mature miRNA	standard	MIMAT0004902	hsa-miR-891a-5p	hsa-miR-891a-5p
890	hsa-miR-891b	2.2472	6.95504	0.87146	2.0979	12.9783	0.899281	UGCAACUUACCUGAGUCAUUGA	experimental		mature miRNA	standard	MIMAT0004913	hsa-miR-891b	hsa-miR-891b
891	hsa-miR-892a	2.28392	6.81608	1	0.708046	13.6735	0.829011	CACUGUGUCCUUUCUGCGUAG	experimental		mature miRNA	standard	MIMAT0004907	hsa-miR-892a	hsa-miR-892a
892	hsa-miR-892b	2.54313	7.1853	0.905842	0.349148	12.6463	0.834865	CACUGGCUCCUUUCUGGGUAGA	experimental		mature miRNA	standard	MIMAT0004918	hsa-miR-892b	hsa-miR-892b
893	hsa-miR-892c-3p	0.0380718	6.07186	1	0.415912	13.5986	0.957347	CACUGUUUCCUUUCUGAGUGGA	experimental		mature miRNA	standard	MIMAT0025858	hsa-miR-892c-3p	hsa-miR-892c-3p
894	hsa-miR-892c-5p	1.44797	6.73769	0.889281	2.8328	12.4022	0.695966	UAUUCAGAAAGGUGCCAGUCA	experimental		mature miRNA	standard	MIMAT0025857	hsa-miR-892c-5p	hsa-miR-892c-5p
895	hsa-miR-920	1.54607	6.52702	0.886359	2.07938	14.5212	0.812035	GGGGAGCUGUGGAAGCAGUA	experimental		mature miRNA	standard	MIMAT0004970	hsa-miR-920	hsa-miR-920
896	hsa-miR-921	1.37752	6.39139	0.84449	7.53773	11.7034	0.435172	CUAGUGAGGGACAGAACCAGGAUUC	experimental		mature miRNA	standard	MIMAT0004971	hsa-miR-921	hsa-miR-921
897	hsa-miR-922	2.55274	6.43364	0.727043	5.65666	14.0235	0.587982	GCAGCAGAGAAUAGGACUACGUC	experimental		mature miRNA	standard	MIMAT0004972	hsa-miR-922	hsa-miR-922
898	hsa-miR-924	3.35212	6.91583	0.657016	5.0053	12.948	0.617042	AGAGUCUUGUGAUGUCUUGC	experimental		mature miRNA	standard	MIMAT0004974	hsa-miR-924	hsa-miR-924
899	hsa-miR-933	4.44521	8.51511	0.693239	2.70885	14.8116	0.769808	UGUGCGCAGGGAGACCUCUCCC	experimental		mature miRNA	standard	MIMAT0004976	hsa-miR-933	hsa-miR-933
900	hsa-miR-934	2.14568	6.78446	0.796617	5.72807	14.732	0.634049	UGUCUACUACUGGAGACACUGG	experimental		mature miRNA	standard	MIMAT0004977	hsa-miR-934	hsa-miR-934
901	hsa-miR-935	0.0203909	5.90195	1	3.74322	13.7722	0.564245	CCAGUUACCGCUUCCGCUACCGC	experimental		mature miRNA	standard	MIMAT0004978	hsa-miR-935	hsa-miR-935
902	hsa-miR-936	5.35945	8.17836	0.569819	9.72759	13.7974	0.438294	ACAGUAGAGGGAGGAAUCGCAG	experimental		mature miRNA	standard	MIMAT0004979	hsa-miR-936	hsa-miR-936
903	hsa-miR-937-3p	2.74422	7.46175	0.820451	5.83122	16.4322	0.56511	AUCCGCGCUCUGACUCUCUGCC	experimental		mature miRNA	standard	MIMAT0004980	hsa-miR-937-3p	hsa-miR-937-3p
904	hsa-miR-937-5p	46.0169	18.5503	0.00700754	53.7369	25.4744	0.0884221	GUGAGUCAGGGUGGGGCUGG	experimental		mature miRNA	standard	MIMAT0022938	hsa-miR-937-5p	hsa-miR-937-5p
905	hsa-miR-938	0.545942	7.33321	1	4.57844	14.2131	0.588743	UGCCCUUAAAGGUGAACCCAGU	experimental		mature miRNA	standard	MIMAT0004981	hsa-miR-938	hsa-miR-938
906	hsa-miR-939-3p	2.34871	6.51948	0.79639	3.74095	13.9599	0.716901	CCCUGGGCCUCUGCUCCCCAG	experimental		mature miRNA	standard	MIMAT0022939	hsa-miR-939-3p	hsa-miR-939-3p
907	hsa-miR-939-5p	10.9138	9.53929	0.290522	11.9041	17.6642	0.452862	UGGGGAGCUGAGGCUCUGGGGGUG	experimental		mature miRNA	standard	MIMAT0004982	hsa-miR-939-5p	hsa-miR-939-5p
908	hsa-miR-940	25.8435	12.6906	0.0341389	28.8654	22.3269	0.107908	AAGGCAGGGCCCCCGCUCCCC	experimental		mature miRNA	standard	MIMAT0004983	hsa-miR-940	hsa-miR-940
909	hsa-miR-941	2.65214	6.96567	0.762525	10.0531	30.2062	0.676279	CACCCGGCUGUGUGCACAUGUGC	experimental		mature miRNA	standard	MIMAT0004984	hsa-miR-941	hsa-miR-941
910	hsa-miR-942-3p	0.0212159	7.77635	1	2.85364	14.8845	0.613046	CACAUGGCCGAAACAGAGAAGU	experimental		mature miRNA	standard	MIMAT0026734	hsa-miR-942-3p	hsa-miR-942-3p
911	hsa-miR-942-5p	3.10234	5.9061	0.652261	7.12419	29.6761	0.698322	UCUUCUCUGUUUUGGCCAUGUG	experimental		mature miRNA	standard	MIMAT0004985	hsa-miR-942-5p	hsa-miR-942-5p
912	hsa-miR-943	2.30599	6.21047	0.737059	7.93635	15.3906	0.354667	CUGACUGUUGCCGUCCUCCAG	experimental		mature miRNA	standard	MIMAT0004986	hsa-miR-943	hsa-miR-943
913	hsa-miR-944	2.11444	7.00946	0.823557	6.64448	12.4244	0.261397	AAAUUAUUGUACAUCGGAUGAG	experimental		mature miRNA	standard	MIMAT0004987	hsa-miR-944	hsa-miR-944
914	hsa-miR-1178-3p	1.03364	6.92985	1	0.00262661	13.7527	1	UUGCUCACUGUUCUUCCCUAG	experimental		mature miRNA	standard	MIMAT0005823	hsa-miR-1178-3p	hsa-miR-1178-3p
915	hsa-miR-1178-5p	4.92758	10.6852	1	0.0164143	14.7342	1	CAGGGUCAGCUGAGCAUG	experimental		mature miRNA	standard	MIMAT0022940	hsa-miR-1178-5p	hsa-miR-1178-5p
916	hsa-miR-1179	0.277694	6.13574	1	0.115179	14.5157	1	AAGCAUUCUUUCAUUGGUUGG	experimental		mature miRNA	standard	MIMAT0005824	hsa-miR-1179	hsa-miR-1179
917	hsa-miR-1180-3p	1.89065	6.97943	0.780422	3.01835	14.6975	0.787787	UUUCCGGCUCGCGUGGGUGUGU	experimental		mature miRNA	standard	MIMAT0005825	hsa-miR-1180-3p	hsa-miR-1180-3p
918	hsa-miR-1180-5p	0.0380718	6.36271	1	0.337145	12.2062	1	GGACCCACCCGGCCGGGAAUA	experimental		mature miRNA	standard	MIMAT0026735	hsa-miR-1180-5p	hsa-miR-1180-5p
919	hsa-miR-1181	1.74474	6.91763	0.86823	0.574792	13.4946	0.998299	CCGUCGCCGCCACCCGAGCCG	experimental		mature miRNA	standard	MIMAT0005826	hsa-miR-1181	hsa-miR-1181
920	hsa-miR-1182	1.53066	6.95842	0.926073	2.49771	13.4246	0.860399	GAGGGUCUUGGGAGGGAUGUGAC	experimental		mature miRNA	standard	MIMAT0005827	hsa-miR-1182	hsa-miR-1182
921	hsa-miR-1183	4.01633	6.28379	0.574696	4.36467	12.5691	0.708356	CACUGUAGGUGAUGGUGAGAGUGGGCA	experimental		mature miRNA	standard	MIMAT0005828	hsa-miR-1183	hsa-miR-1183
922	hsa-miR-1184	0.892906	6.16871	1	0.305561	9.57661	1	CCUGCAGCGACUUGAUGGCUUCC	experimental		mature miRNA	standard	MIMAT0005829	hsa-miR-1184	hsa-miR-1184
923	hsa-miR-1185-1-3p	2.54354	8.22122	0.810695	5.16843	15.0384	0.697484	AUAUACAGGGGGAGACUCUUAU	experimental		mature miRNA	standard	MIMAT0022838	hsa-miR-1185-1-3p	hsa-miR-1185-1-3p
924	hsa-miR-1185-2-3p	16.5549	8.15876	0.0604122	11.3607	16.2264	0.49796	AUAUACAGGGGGAGACUCUCAU	experimental		mature miRNA	standard	MIMAT0022713	hsa-miR-1185-2-3p	hsa-miR-1185-2-3p
925	hsa-miR-1185-5p	2.6835	7.03937	0.764945	1.86485	12.2829	0.89904	AGAGGAUACCCUUUGUAUGUU	experimental		mature miRNA	standard	MIMAT0005798	hsa-miR-1185-5p	hsa-miR-1185-5p
926	hsa-miR-1193	0.18247	5.78951	1	0.473154	14.1312	0.974878	GGGAUGGUAGACCGGUGACGUGC	experimental		mature miRNA	standard	MIMAT0015049	hsa-miR-1193	hsa-miR-1193
927	hsa-miR-1197	3.0211	6.96646	0.897164	0.00401277	12.0831	1	UAGGACACAUGGUCUACUUCU	experimental		mature miRNA	standard	MIMAT0005955	hsa-miR-1197	hsa-miR-1197
928	hsa-miR-1199-3p	1.41321	6.34654	1	0.790134	13.4209	1	UGCGGCCGGUGCUCAACCUGC	experimental		mature miRNA	standard	MIMAT0031120	hsa-miR-1199-3p	hsa-miR-1199-3p
929	hsa-miR-1199-5p	1.49553	6.32717	1	0.108689	14.5756	1	CCUGAGCCCGGGCCGCGCAG	experimental		mature miRNA	standard	MIMAT0031119	hsa-miR-1199-5p	hsa-miR-1199-5p
930	hsa-miR-1200	5.00078	9.40937	0.723297	0.745487	14.6137	1	CUCCUGAGCCAUUCUGAGCCUC	experimental		mature miRNA	standard	MIMAT0005863	hsa-miR-1200	hsa-miR-1200
931	hsa-miR-1202	0.0380718	6.98428	1	0.241528	13.0655	1	GUGCCAGCUGCAGUGGGGGAG	experimental		mature miRNA	standard	MIMAT0005865	hsa-miR-1202	hsa-miR-1202
932	hsa-miR-1203	4.20186	7.99985	0.733647	1.60665	14.9308	1	CCCGGAGCCAGGAUGCAGCUC	experimental		mature miRNA	standard	MIMAT0005866	hsa-miR-1203	hsa-miR-1203
933	hsa-miR-1204	2.72014	7.96292	1	0.00262661	13.5354	1	UCGUGGCCUGGUCUCCAUUAU	experimental		mature miRNA	standard	MIMAT0005868	hsa-miR-1204	hsa-miR-1204
934	hsa-miR-1205	0.943156	7.53027	1	0.00346537	11.7054	1	UCUGCAGGGUUUGCUUUGAG	experimental		mature miRNA	standard	MIMAT0005869	hsa-miR-1205	hsa-miR-1205
935	hsa-miR-1206	3.62631	8.46456	0.878418	0.137119	12.6989	1	UGUUCAUGUAGAUGUUUAAGC	experimental		mature miRNA	standard	MIMAT0005870	hsa-miR-1206	hsa-miR-1206
936	hsa-miR-1207-3p	0.0380718	5.54596	1	0.00262661	13.9628	1	UCAGCUGGCCCUCAUUUC	experimental		mature miRNA	standard	MIMAT0005872	hsa-miR-1207-3p	hsa-miR-1207-3p
937	hsa-miR-1207-5p	10.6579	9.46101	0.553372	0.00452577	13.9006	1	UGGCAGGGAGGCUGGGAGGGG	experimental		mature miRNA	standard	MIMAT0005871	hsa-miR-1207-5p	hsa-miR-1207-5p
938	hsa-miR-1208	0.0380718	6.68865	1	0.00262661	13.6827	1	UCACUGUUCAGACAGGCGGA	experimental		mature miRNA	standard	MIMAT0005873	hsa-miR-1208	hsa-miR-1208
939	hsa-miR-1224-3p	1.05487	7.01123	1	0.610844	13.877	1	CCCCACCUCCUCUCUCCUCAG	experimental		mature miRNA	standard	MIMAT0005459	hsa-miR-1224-3p	hsa-miR-1224-3p
940	hsa-miR-1224-5p	23.2731	12.3047	0.248697	0.750987	15.6463	1	GUGAGGACUCGGGAGGUGG	experimental		mature miRNA	standard	MIMAT0005458	hsa-miR-1224-5p	hsa-miR-1224-5p
941	hsa-miR-1225-3p	2.9724	8.72121	0.866249	0.333781	14.0621	1	UGAGCCCCUGUGCCGCCCCCAG	experimental		mature miRNA	standard	MIMAT0005573	hsa-miR-1225-3p	hsa-miR-1225-3p
942	hsa-miR-1225-5p	0.0380718	7.18019	1	0.00262661	13.4219	1	GUGGGUACGGCCCAGUGGGGGG	experimental		mature miRNA	standard	MIMAT0005572	hsa-miR-1225-5p	hsa-miR-1225-5p
943	hsa-miR-1226-3p	4.06365	6.90444	0.764201	0.0043004	15.5793	1	UCACCAGCCCUGUGUUCCCUAG	experimental		mature miRNA	standard	MIMAT0005577	hsa-miR-1226-3p	hsa-miR-1226-3p
944	hsa-miR-1226-5p	0.0380718	6.45386	1	0.00262661	12.924	1	GUGAGGGCAUGCAGGCCUGGAUGGGG	experimental		mature miRNA	standard	MIMAT0005576	hsa-miR-1226-5p	hsa-miR-1226-5p
945	hsa-miR-1227-3p	0.130637	6.198	1	0.643336	13.8481	0.989647	CGUGCCACCCUUUUCCCCAG	experimental		mature miRNA	standard	MIMAT0005580	hsa-miR-1227-3p	hsa-miR-1227-3p
946	hsa-miR-1227-5p	190.107	26.0953	2.79081e-14	154.193	28.0841	2.82132e-06	GUGGGGCCAGGCGGUGG	experimental		mature miRNA	standard	MIMAT0022941	hsa-miR-1227-5p	hsa-miR-1227-5p
947	hsa-miR-1228-3p	6.07119	10.4558	0.729741	0.749141	14.2181	0.981489	UCACACCUGCCUCGCCCCCC	experimental		mature miRNA	standard	MIMAT0005583	hsa-miR-1228-3p	hsa-miR-1228-3p
948	hsa-miR-1228-5p	47.2921	17.9913	0.00666342	26.5552	17.4183	0.201009	GUGGGCGGGGGCAGGUGUGUG	experimental		mature miRNA	standard	MIMAT0005582	hsa-miR-1228-5p	hsa-miR-1228-5p
949	hsa-miR-1229-3p	3.81005	7.48699	0.69554	4.3939	15.8816	0.770978	CUCUCACCACUGCCCUCCCACAG	experimental		mature miRNA	standard	MIMAT0005584	hsa-miR-1229-3p	hsa-miR-1229-3p
950	hsa-miR-1229-5p	16.9354	8.56891	0.0437246	16.8722	13.3326	0.271099	GUGGGUAGGGUUUGGGGGAGAGCG	experimental		mature miRNA	standard	MIMAT0022942	hsa-miR-1229-5p	hsa-miR-1229-5p
951	hsa-miR-1231	8.65286	10.0448	0.583929	0.476943	13.2707	1	GUGUCUGGGCGGACAGCUGC	experimental		mature miRNA	standard	MIMAT0005586	hsa-miR-1231	hsa-miR-1231
952	hsa-miR-1233-3p	5.58121	6.52885	0.444319	3.75608	12.0782	0.744787	UGAGCCCUGUCCUCCCGCAG	experimental		mature miRNA	standard	MIMAT0005588	hsa-miR-1233-3p	hsa-miR-1233-3p
953	hsa-miR-1233-5p	67.5808	15.4762	5.21487e-06	49.0017	17.5197	0.0257699	AGUGGGAGGCCAGGGCACGGCA	experimental		mature miRNA	standard	MIMAT0022943	hsa-miR-1233-5p	hsa-miR-1233-5p
954	hsa-miR-1234-3p	5.31744	8.37176	0.672733	3.50138	14.1308	0.803986	UCGGCCUGACCACCCACCCCAC	experimental		mature miRNA	standard	MIMAT0005589	hsa-miR-1234-3p	hsa-miR-1234-3p
955	hsa-miR-1236-3p	4.46846	9.1188	0.714861	1.32295	13.3105	1	CCUCUUCCCCUUGUCUCUCCAG	experimental		mature miRNA	standard	MIMAT0005591	hsa-miR-1236-3p	hsa-miR-1236-3p
956	hsa-miR-1236-5p	3.75572	7.66337	0.840159	0.00413442	12.1047	1	UGAGUGACAGGGGAAAUGGGGA	experimental		mature miRNA	standard	MIMAT0022945	hsa-miR-1236-5p	hsa-miR-1236-5p
957	hsa-miR-1237-3p	3.83469	8.65342	0.725125	2.76042	15.1452	0.870599	UCCUUCUGCUCCGUCCCCCAG	experimental		mature miRNA	standard	MIMAT0005592	hsa-miR-1237-3p	hsa-miR-1237-3p
958	hsa-miR-1237-5p	38.6919	14.3225	0.00565254	35.6038	20.4926	0.158356	CGGGGGCGGGGCCGAAGCGCG	experimental		mature miRNA	standard	MIMAT0022946	hsa-miR-1237-5p	hsa-miR-1237-5p
959	hsa-miR-1238-3p	6.70311	9.36946	0.827667	0.348442	11.3318	1	CUUCCUCGUCUGUCUGCCCC	experimental		mature miRNA	standard	MIMAT0005593	hsa-miR-1238-3p	hsa-miR-1238-3p
960	hsa-miR-1238-5p	7.70183	11.2514	0.731764	1.41846	12.8639	0.972759	GUGAGUGGGAGCCCCAGUGUGUG	experimental		mature miRNA	standard	MIMAT0022947	hsa-miR-1238-5p	hsa-miR-1238-5p
961	hsa-miR-1243	0.731598	7.42124	1	0.00262661	11.9136	1	AACUGGAUCAAUUAUAGGAGUG	experimental		mature miRNA	standard	MIMAT0005894	hsa-miR-1243	hsa-miR-1243
962	hsa-miR-1244	4.36297	8.35524	0.707898	6.48	22.3225	0.807525	AAGUAGUUGGUUUGUAUGAGAUGGUU	experimental		mature miRNA	standard	MIMAT0005896	hsa-miR-1244	hsa-miR-1244
963	hsa-miR-1245a	1.92818	7.68794	1	0.00262661	13.4075	1	AAGUGAUCUAAAGGCCUACAU	experimental		mature miRNA	standard	MIMAT0005897	hsa-miR-1245a	hsa-miR-1245a
964	hsa-miR-1245b-3p	1.83362	7.89495	1	0.00262661	13.2086	1	UCAGAUGAUCUAAAGGCCUAUA	experimental		mature miRNA	standard	MIMAT0019951	hsa-miR-1245b-3p	hsa-miR-1245b-3p
965	hsa-miR-1245b-5p	0.139277	7.49958	1	0.802459	16.2505	1	UAGGCCUUUAGAUCACUUAAA	experimental		mature miRNA	standard	MIMAT0019950	hsa-miR-1245b-5p	hsa-miR-1245b-5p
966	hsa-miR-1246	45.0039	12.0171	4.0914e-05	19.5856	19.2042	0.320271	AAUGGAUUUUUGGAGCAGG	experimental		mature miRNA	standard	MIMAT0005898	hsa-miR-1246	hsa-miR-1246
967	hsa-miR-1247-3p	0.0380718	8.34943	1	0.00262661	14.4249	1	CCCCGGGAACGUCGAGACUGGAGC	experimental		mature miRNA	standard	MIMAT0022721	hsa-miR-1247-3p	hsa-miR-1247-3p
968	hsa-miR-1247-5p	3.89347	7.44222	0.743048	0.888695	15.1683	1	ACCCGUCCCGUUCGUCCCCGGA	experimental		mature miRNA	standard	MIMAT0005899	hsa-miR-1247-5p	hsa-miR-1247-5p
969	hsa-miR-1248	0.0380718	6.45756	1	0.00262661	13.1163	1	ACCUUCUUGUAUAAGCACUGUGCUAAA	experimental		mature miRNA	standard	MIMAT0005900	hsa-miR-1248	hsa-miR-1248
970	hsa-miR-1249	8.37445	8.15096	0.328346	3.99282	12.8432	0.772356	ACGCCCUUCCCCCCCUUCUUCA	experimental		mature miRNA	standard	MIMAT0005901	hsa-miR-1249	hsa-miR-1249
971	hsa-miR-1250-3p	0.602608	4.6295	1	0.00262661	12.8542	1	ACAUUUUCCAGCCCAUUCA	experimental		mature miRNA	standard	MIMAT0026740	hsa-miR-1250-3p	hsa-miR-1250-3p
972	hsa-miR-1250-5p	2.36551	8.57653	0.924542	0.00262661	13.7073	1	ACGGUGCUGGAUGUGGCCUUU	experimental		mature miRNA	standard	MIMAT0005902	hsa-miR-1250-5p	hsa-miR-1250-5p
973	hsa-miR-1251-3p	2.70189	8.00182	0.976819	0.908812	14.3561	0.936003	CGCUUUGCUCAGCCAGUGUAG	experimental		mature miRNA	standard	MIMAT0026741	hsa-miR-1251-3p	hsa-miR-1251-3p
974	hsa-miR-1251-5p	3.19229	8.07491	0.973624	0.00262661	11.9074	1	ACUCUAGCUGCCAAAGGCGCU	experimental		mature miRNA	standard	MIMAT0005903	hsa-miR-1251-5p	hsa-miR-1251-5p
975	hsa-miR-1252-3p	2.91634	7.87304	0.771201	0.865698	12.8912	0.953503	CAAAUGAGCUUAAUUUCCUUUU	experimental		mature miRNA	standard	MIMAT0026744	hsa-miR-1252-3p	hsa-miR-1252-3p
976	hsa-miR-1252-5p	1.54663	6.71835	0.792276	1.2941	12.8509	0.936439	AGAAGGAAAUUGAAUUCAUUUA	experimental		mature miRNA	standard	MIMAT0005944	hsa-miR-1252-5p	hsa-miR-1252-5p
977	hsa-miR-1253	1.83431	6.6355	0.795474	2.78401	14.3115	0.814137	AGAGAAGAAGAUCAGCCUGCA	experimental		mature miRNA	standard	MIMAT0005904	hsa-miR-1253	hsa-miR-1253
978	hsa-miR-1254	2.95825	5.90873	0.619957	2.51364	13.4841	0.860807	AGCCUGGAAGCUGGAGCCUGCAGU	experimental		mature miRNA	standard	MIMAT0005905	hsa-miR-1254	hsa-miR-1254
979	hsa-miR-1255a	2.82922	7.22576	0.737157	1.79077	13.1914	0.971322	AGGAUGAGCAAAGAAAGUAGAUU	experimental		mature miRNA	standard	MIMAT0005906	hsa-miR-1255a	hsa-miR-1255a
980	hsa-miR-1255b-2-3p	2.32281	7.81347	0.810476	2.71896	13.74	0.832148	AACCACUUUCUUUGCUCAUCCA	experimental		mature miRNA	standard	MIMAT0022725	hsa-miR-1255b-2-3p	hsa-miR-1255b-2-3p
981	hsa-miR-1255b-5p	2.96075	7.18132	0.719378	2.91776	13.9175	0.826337	CGGAUGAGCAAAGAAAGUGGUU	experimental		mature miRNA	standard	MIMAT0005945	hsa-miR-1255b-5p	hsa-miR-1255b-5p
982	hsa-miR-1256	2.37339	6.27072	0.708399	3.86388	15.2709	0.780292	AGGCAUUGACUUCUCACUAGCU	experimental		mature miRNA	standard	MIMAT0005907	hsa-miR-1256	hsa-miR-1256
983	hsa-miR-1257	2.64547	6.85269	0.724282	5.21945	13.9137	0.673462	AGUGAAUGAUGGGUUCUGACC	experimental		mature miRNA	standard	MIMAT0005908	hsa-miR-1257	hsa-miR-1257
984	hsa-miR-1258	2.50534	6.37229	0.73864	1.80792	13.6317	0.896517	AGUUAGGAUUAGGUCGUGGAA	experimental		mature miRNA	standard	MIMAT0005909	hsa-miR-1258	hsa-miR-1258
985	hsa-miR-1260a	7.39138	7.24963	0.376264	10.8175	18.4046	0.50821	AUCCCACCUCUGCCACCA	experimental		mature miRNA	standard	MIMAT0005911	hsa-miR-1260a	hsa-miR-1260a
986	hsa-miR-1260b	86.3011	24.5506	0.000128416	102.579	24.3142	0.000679988	AUCCCACCACUGCCACCAU	experimental		mature miRNA	standard	MIMAT0015041	hsa-miR-1260b	hsa-miR-1260b
987	hsa-miR-1261	0.437548	7.12673	0.97685	1.68774	14.6086	0.890338	AUGGAUAAGGCUUUGGCUU	experimental		mature miRNA	standard	MIMAT0005913	hsa-miR-1261	hsa-miR-1261
988	hsa-miR-1262	1.05471	6.5238	1	1.09275	13.1403	1	AUGGGUGAAUUUGUAGAAGGAU	experimental		mature miRNA	standard	MIMAT0005914	hsa-miR-1262	hsa-miR-1262
989	hsa-miR-1263	0.853877	6.30735	1	1.07873	14.1287	0.916542	AUGGUACCCUGGCAUACUGAGU	experimental		mature miRNA	standard	MIMAT0005915	hsa-miR-1263	hsa-miR-1263
990	hsa-miR-1264	0.276984	6.80797	0.998245	0.492391	14.3236	0.997361	CAAGUCUUAUUUGAGCACCUGUU	experimental		mature miRNA	standard	MIMAT0005791	hsa-miR-1264	hsa-miR-1264
991	hsa-miR-1265	2.0605	6.82214	0.801592	5.05782	16.8312	0.692944	CAGGAUGUGGUCAAGUGUUGUU	experimental		mature miRNA	standard	MIMAT0005918	hsa-miR-1265	hsa-miR-1265
992	hsa-miR-1266-3p	0.405843	6.40736	1	1.08485	12.9775	0.836582	CCCUGUUCUAUGCCCUGAGGGA	experimental		mature miRNA	standard	MIMAT0026742	hsa-miR-1266-3p	hsa-miR-1266-3p
993	hsa-miR-1266-5p	0.0221671	6.85504	1	1.42588	14.7526	0.89496	CCUCAGGGCUGUAGAACAGGGCU	experimental		mature miRNA	standard	MIMAT0005920	hsa-miR-1266-5p	hsa-miR-1266-5p
994	hsa-miR-1267	1.00526	6.4436	0.940439	2.42287	13.8689	0.690702	CCUGUUGAAGUGUAAUCCCCA	experimental		mature miRNA	standard	MIMAT0005921	hsa-miR-1267	hsa-miR-1267
995	hsa-miR-1268a	17.9205	10.7939	0.0930781	21.4638	16.5481	0.225997	CGGGCGUGGUGGUGGGGG	experimental		mature miRNA	standard	MIMAT0005922	hsa-miR-1268a	hsa-miR-1268a
996	hsa-miR-1268b	21.2627	11.0462	0.0622124	19.9333	15.1956	0.228653	CGGGCGUGGUGGUGGGGGUG	experimental		mature miRNA	standard	MIMAT0018925	hsa-miR-1268b	hsa-miR-1268b
997	hsa-miR-1269a	1.96481	7.61812	0.758164	3.27035	13.2062	0.681116	CUGGACUGAGCCGUGCUACUGG	experimental		mature miRNA	standard	MIMAT0005923	hsa-miR-1269a	hsa-miR-1269a
998	hsa-miR-1269b	1.28689	6.23087	0.934582	2.48739	13.7224	0.776925	CUGGACUGAGCCAUGCUACUGG	experimental		mature miRNA	standard	MIMAT0019059	hsa-miR-1269b	hsa-miR-1269b
999	hsa-miR-1270	0.911271	6.38949	0.810289	12.4732	36.021	0.663989	CUGGAGAUAUGGAAGAGCUGUGU	experimental		mature miRNA	standard	MIMAT0005924	hsa-miR-1270	hsa-miR-1270
1000	hsa-miR-1271-3p	1.87267	7.00739	0.784	3.06387	13.445	0.689146	AGUGCCUGCUAUGUGCCAGGCA	experimental		mature miRNA	standard	MIMAT0022712	hsa-miR-1271-3p	hsa-miR-1271-3p
1001	hsa-miR-1271-5p	5.22107	6.91288	0.495003	6.19999	14.326	0.526231	CUUGGCACCUAGCAAGCACUCA	experimental		mature miRNA	standard	MIMAT0005796	hsa-miR-1271-5p	hsa-miR-1271-5p
1002	hsa-miR-1272	1.83793	6.53057	0.787532	6.1329	13.4891	0.551781	GAUGAUGAUGGCAGCAAAUUCUGAAA	experimental		mature miRNA	standard	MIMAT0005925	hsa-miR-1272	hsa-miR-1272
1003	hsa-miR-1273a	1.59528	5.96037	0.768363	4.64445	11.2283	0.535415	GGGCGACAAAGCAAGACUCUUUCUU	experimental		mature miRNA	standard	MIMAT0005926	hsa-miR-1273a	hsa-miR-1273a
1004	hsa-miR-1273c	7.57374	8.02466	0.35796	7.24728	12.7235	0.48748	GGCGACAAAACGAGACCCUGUC	experimental		mature miRNA	standard	MIMAT0015017	hsa-miR-1273c	hsa-miR-1273c
1005	hsa-miR-1273d	2.41908	8.50355	0.845816	2.11314	13.3394	0.730647	GAACCCAUGAGGUUGAGGCUGCAGU	experimental		mature miRNA	standard	MIMAT0015090	hsa-miR-1273d	hsa-miR-1273d
1006	hsa-miR-1273e	3.05955	7.09009	0.630632	8.09676	15.7298	0.489422	UUGCUUGAACCCAGGAAGUGGA	experimental		mature miRNA	standard	MIMAT0018079	hsa-miR-1273e	hsa-miR-1273e
1007	hsa-miR-1273f	11.4775	12.9923	0.377807	9.21654	14.9355	0.473044	GGAGAUGGAGGUUGCAGUG	experimental		mature miRNA	standard	MIMAT0020601	hsa-miR-1273f	hsa-miR-1273f
1008	hsa-miR-1273g-3p	887.645	86.05	1.48959e-20	1250.97	118.339	7.49734e-14	ACCACUGCACUCCAGCCUGAG	experimental		mature miRNA	standard	MIMAT0022742	hsa-miR-1273g-3p	hsa-miR-1273g-3p
1009	hsa-miR-1273g-5p	0.0236989	7.91005	1	1.02094	17.5357	0.944642	GGUGGUUGAGGCUGCAGUAAGU	experimental		mature miRNA	standard	MIMAT0020602	hsa-miR-1273g-5p	hsa-miR-1273g-5p
1010	hsa-miR-1273h-3p	5.93863	12.6426	1	0.382553	14.875	0.970216	CUGCAGACUCGACCUCCCAGGC	experimental		mature miRNA	standard	MIMAT0030416	hsa-miR-1273h-3p	hsa-miR-1273h-3p
1011	hsa-miR-1273h-5p	0.0380718	7.43384	1	0.680331	16.0856	0.998301	CUGGGAGGUCAAGGCUGCAGU	experimental		mature miRNA	standard	MIMAT0030415	hsa-miR-1273h-5p	hsa-miR-1273h-5p
1012	hsa-miR-1275	171.348	30.2179	1.19866e-07	259.026	46.4072	5.13757e-06	GUGGGGGAGAGGCUGUC	experimental		mature miRNA	standard	MIMAT0005929	hsa-miR-1275	hsa-miR-1275
1013	hsa-miR-1276	0.578741	7.29013	1	2.28785	16.7867	0.876799	UAAAGAGCCCUGUGGAGACA	experimental		mature miRNA	standard	MIMAT0005930	hsa-miR-1276	hsa-miR-1276
1014	hsa-miR-1277-3p	2.95374	8.49081	1	0.818435	14.6614	0.888432	UACGUAGAUAUAUAUGUAUUUU	experimental		mature miRNA	standard	MIMAT0005933	hsa-miR-1277-3p	hsa-miR-1277-3p
1015	hsa-miR-1277-5p	2.20768	7.60721	0.948614	1.3847	11.3737	0.955638	AAAUAUAUAUAUAUAUGUACGUAU	experimental		mature miRNA	standard	MIMAT0022724	hsa-miR-1277-5p	hsa-miR-1277-5p
1016	hsa-miR-1278	3.18627	7.9067	0.907002	1.81539	13.5923	0.842121	UAGUACUGUGCAUAUCAUCUAU	experimental		mature miRNA	standard	MIMAT0005936	hsa-miR-1278	hsa-miR-1278
1017	hsa-miR-1279	2.44275	7.70269	1	1.98083	15.0701	0.815844	UCAUAUUGCUUCUUUCU	experimental		mature miRNA	standard	MIMAT0005937	hsa-miR-1279	hsa-miR-1279
1018	hsa-miR-1281	20.5392	10.4894	0.0729414	24.0422	22.9596	0.277458	UCGCCUCCUCCUCUCCC	experimental		mature miRNA	standard	MIMAT0005939	hsa-miR-1281	hsa-miR-1281
1019	hsa-miR-1282	3.40878	9.25006	0.980309	1.54423	13.3077	0.793044	UCGUUUGCCUUUUUCUGCUU	experimental		mature miRNA	standard	MIMAT0005940	hsa-miR-1282	hsa-miR-1282
1020	hsa-miR-1283	2.19994	7.87667	0.961071	0.813119	13.2409	0.841651	UCUACAAAGGAAAGCGCUUUCU	experimental		mature miRNA	standard	MIMAT0005799	hsa-miR-1283	hsa-miR-1283
1021	hsa-miR-1284	4.50717	7.71495	0.671926	1.26288	13.425	0.852073	UCUAUACAGACCCUGGCUUUUC	experimental		mature miRNA	standard	MIMAT0005941	hsa-miR-1284	hsa-miR-1284
1022	hsa-miR-1285-3p	5.63858	7.00052	0.493186	2.93068	13.5169	0.787379	UCUGGGCAACAAAGUGAGACCU	experimental		mature miRNA	standard	MIMAT0005876	hsa-miR-1285-3p	hsa-miR-1285-3p
1023	hsa-miR-1285-5p	7.02421	7.74808	0.444283	2.46828	14.7347	0.829975	GAUCUCACUUUGUUGCCCAGG	experimental		mature miRNA	standard	MIMAT0022719	hsa-miR-1285-5p	hsa-miR-1285-5p
1024	hsa-miR-1286	6.68943	21.6545	0.869533	0.534094	14.9916	1	UGCAGGACCAAGAUGAGCCCU	experimental		mature miRNA	standard	MIMAT0005877	hsa-miR-1286	hsa-miR-1286
1025	hsa-miR-1287-3p	0.792649	7.22449	1	0.160381	14.0608	1	CUCUAGCCACAGAUGCAGUGAU	experimental		mature miRNA	standard	MIMAT0026738	hsa-miR-1287-3p	hsa-miR-1287-3p
1026	hsa-miR-1287-5p	3.66316	9.32794	0.803939	0.375881	14.101	0.916397	UGCUGGAUCAGUGGUUCGAGUC	experimental		mature miRNA	standard	MIMAT0005878	hsa-miR-1287-5p	hsa-miR-1287-5p
1027	hsa-miR-1288-3p	5.26849	11.7368	0.908848	0.234679	14.5554	1	UGGACUGCCCUGAUCUGGAGA	experimental		mature miRNA	standard	MIMAT0005942	hsa-miR-1288-3p	hsa-miR-1288-3p
1028	hsa-miR-1288-5p	3.30145	9.33348	0.981494	1.87919	24.8877	0.891035	GCAGAUCAGGACUGUAACUCACC	experimental		mature miRNA	standard	MIMAT0026743	hsa-miR-1288-5p	hsa-miR-1288-5p
1029	hsa-miR-1289	5.38823	11.3689	0.946851	0.30554	10.4404	1	UGGAGUCCAGGAAUCUGCAUUUU	experimental		mature miRNA	standard	MIMAT0005879	hsa-miR-1289	hsa-miR-1289
1030	hsa-miR-1290	2.44483	8.65793	1	0.00262661	14.191	1	UGGAUUUUUGGAUCAGGGA	experimental		mature miRNA	standard	MIMAT0005880	hsa-miR-1290	hsa-miR-1290
1031	hsa-miR-1291	1.01083	6.92244	1	0.00376691	13.725	1	UGGCCCUGACUGAAGACCAGCAGU	experimental		mature miRNA	standard	MIMAT0005881	hsa-miR-1291	hsa-miR-1291
1032	hsa-miR-1292-3p	5.13345	8.88797	0.709469	2.05857	15.1145	0.913343	UCGCGCCCCGGCUCCCGUUC	experimental		mature miRNA	standard	MIMAT0022948	hsa-miR-1292-3p	hsa-miR-1292-3p
1033	hsa-miR-1292-5p	2.27033	8.69577	1	0.00262661	14.3472	1	UGGGAACGGGUUCCGGCAGACGCUG	experimental		mature miRNA	standard	MIMAT0005943	hsa-miR-1292-5p	hsa-miR-1292-5p
1034	hsa-miR-1293	4.6181	10.6127	1	0.479757	15.4615	1	UGGGUGGUCUGGAGAUUUGUGC	experimental		mature miRNA	standard	MIMAT0005883	hsa-miR-1293	hsa-miR-1293
1035	hsa-miR-1294	0.0380718	7.64925	1	0.269885	16.4341	1	UGUGAGGUUGGCAUUGUUGUCU	experimental		mature miRNA	standard	MIMAT0005884	hsa-miR-1294	hsa-miR-1294
1036	hsa-miR-1295a	0.921957	7.25436	1	0.00262661	14.7469	1	UUAGGCCGCAGAUCUGGGUGA	experimental		mature miRNA	standard	MIMAT0005885	hsa-miR-1295a	hsa-miR-1295a
1037	hsa-miR-1295b-3p	3.65074	8.18761	1	0.424158	14.44	0.979097	AAUAGGCCACGGAUCUGGGCAA	experimental		mature miRNA	standard	MIMAT0022294	hsa-miR-1295b-3p	hsa-miR-1295b-3p
1038	hsa-miR-1295b-5p	1.02855	6.8266	1	1.39314	22.7558	0.914378	CACCCAGAUCUGCGGCCUAAU	experimental		mature miRNA	standard	MIMAT0022293	hsa-miR-1295b-5p	hsa-miR-1295b-5p
1039	hsa-miR-1296-3p	3.74562	10.3641	1	0.182981	14.2303	1	GAGUGGGGCUUCGACCCUAACC	experimental		mature miRNA	standard	MIMAT0026637	hsa-miR-1296-3p	hsa-miR-1296-3p
1040	hsa-miR-1296-5p	3.97357	9.26609	1	0.283773	12.0945	1	UUAGGGCCCUGGCUCCAUCUCC	experimental		mature miRNA	standard	MIMAT0005794	hsa-miR-1296-5p	hsa-miR-1296-5p
1041	hsa-miR-1297	6.07752	12.1322	0.970909	0.00262661	12.6022	1	UUCAAGUAAUUCAGGUG	experimental		mature miRNA	standard	MIMAT0005886	hsa-miR-1297	hsa-miR-1297
1042	hsa-miR-1298-3p	0.451559	6.86485	1	1.47281	12.6679	0.820446	CAUCUGGGCAACUGACUGAAC	experimental		mature miRNA	standard	MIMAT0026641	hsa-miR-1298-3p	hsa-miR-1298-3p
1043	hsa-miR-1298-5p	4.01497	9.41891	0.98264	0.422255	16.0225	1	UUCAUUCGGCUGUCCAGAUGUA	experimental		mature miRNA	standard	MIMAT0005800	hsa-miR-1298-5p	hsa-miR-1298-5p
1044	hsa-miR-1299	4.21861	8.7984	0.802731	0.858101	13.2454	1	UUCUGGAAUUCUGUGUGAGGGA	experimental		mature miRNA	standard	MIMAT0005887	hsa-miR-1299	hsa-miR-1299
1045	hsa-miR-1301-3p	11.0568	11.0826	0.341951	9.33228	14.8726	0.563279	UUGCAGCUGCCUGGGAGUGACUUC	experimental		mature miRNA	standard	MIMAT0005797	hsa-miR-1301-3p	hsa-miR-1301-3p
1046	hsa-miR-1301-5p	1.67449	6.58113	0.91151	8.06033	15.0908	0.549671	CGCUCUAGGCACCGCAGCA	experimental		mature miRNA	standard	MIMAT0026639	hsa-miR-1301-5p	hsa-miR-1301-5p
1047	hsa-miR-1302	4.2919	7.24167	0.669331	1.44397	13.0443	0.83939	UUGGGACAUACUUAUGCUAAA	experimental		mature miRNA	standard	MIMAT0005890	hsa-miR-1302	hsa-miR-1302
1048	hsa-miR-1303	2.30849	7.11405	0.822679	2.09302	14.1169	0.76509	UUUAGAGACGGGGUCUUGCUCU	experimental		mature miRNA	standard	MIMAT0005891	hsa-miR-1303	hsa-miR-1303
1049	hsa-miR-1304-3p	0.235717	7.20156	1	0.00262661	13.0444	1	UCUCACUGUAGCCUCGAACCCC	experimental		mature miRNA	standard	MIMAT0022720	hsa-miR-1304-3p	hsa-miR-1304-3p
1050	hsa-miR-1304-5p	1.98647	7.02491	0.890121	2.62456	13.3103	0.795464	UUUGAGGCUACAGUGAGAUGUG	experimental		mature miRNA	standard	MIMAT0005892	hsa-miR-1304-5p	hsa-miR-1304-5p
1051	hsa-miR-1305	0.0380718	7.24175	1	0.00262661	11.441	1	UUUUCAACUCUAAUGGGAGAGA	experimental		mature miRNA	standard	MIMAT0005893	hsa-miR-1305	hsa-miR-1305
1052	hsa-miR-1306-3p	2.10471	7.28382	0.950607	0.0040698	11.6047	1	ACGUUGGCUCUGGUGGUG	experimental		mature miRNA	standard	MIMAT0005950	hsa-miR-1306-3p	hsa-miR-1306-3p
1053	hsa-miR-1306-5p	11.826	11.0654	0.509154	2.26076	14.2859	0.835587	CCACCUCCCCUGCAAACGUCCA	experimental		mature miRNA	standard	MIMAT0022726	hsa-miR-1306-5p	hsa-miR-1306-5p
1054	hsa-miR-1307-3p	107.357	30.0115	0.000159261	232.474	58.0024	0.00292689	ACUCGGCGUGGCGUCGGUCGUG	experimental		mature miRNA	standard	MIMAT0005951	hsa-miR-1307-3p	hsa-miR-1307-3p
1055	hsa-miR-1307-5p	2.46897	7.93004	1	0.00394874	13.982	1	UCGACCGGACCUCGACCGGCU	experimental		mature miRNA	standard	MIMAT0022727	hsa-miR-1307-5p	hsa-miR-1307-5p
1056	hsa-miR-1321	0.0380718	7.8065	1	0.437293	18.7355	1	CAGGGAGGUGAAUGUGAU	experimental		mature miRNA	standard	MIMAT0005952	hsa-miR-1321	hsa-miR-1321
1057	hsa-miR-1322	0.0380718	6.52499	1	0.00262661	14.3395	1	GAUGAUGCUGCUGAUGCUG	experimental		mature miRNA	standard	MIMAT0005953	hsa-miR-1322	hsa-miR-1322
1058	hsa-miR-1323	0.0380718	8.17541	1	0.00262661	14.854	1	UCAAAACUGAGGGGCAUUUUCU	experimental		mature miRNA	standard	MIMAT0005795	hsa-miR-1323	hsa-miR-1323
1059	hsa-miR-1324	0.0380718	8.19916	1	0.00262661	16.9545	1	CCAGACAGAAUUCUAUGCACUUUC	experimental		mature miRNA	standard	MIMAT0005956	hsa-miR-1324	hsa-miR-1324
1060	hsa-miR-1343-3p	0.0380718	6.17146	1	0.0682254	15.6892	1	CUCCUGGGGCCCGCACUCUCGC	experimental		mature miRNA	standard	MIMAT0019776	hsa-miR-1343-3p	hsa-miR-1343-3p
1061	hsa-miR-1343-5p	7.59921	7.43747	0.430921	1.59097	14.3306	0.847951	UGGGGAGCGGCCCCCGGGUGGG	experimental		mature miRNA	standard	MIMAT0027038	hsa-miR-1343-5p	hsa-miR-1343-5p
1062	hsa-miR-1468-3p	2.207	9.06972	1	0.730582	16.3034	0.916909	AGCAAAAUAAGCAAAUGGAAAA	experimental		mature miRNA	standard	MIMAT0026638	hsa-miR-1468-3p	hsa-miR-1468-3p
1063	hsa-miR-1468-5p	0.419876	6.38397	1	0.548389	14.1347	0.981691	CUCCGUUUGCCUGUUUCGCUG	experimental		mature miRNA	standard	MIMAT0006789	hsa-miR-1468-5p	hsa-miR-1468-5p
1064	hsa-miR-1469	698.677	144.712	1.4856e-06	723.734	73.7665	1.27854e-26	CUCGGCGCGGGGCGCGGGCUCC	experimental		mature miRNA	standard	MIMAT0007347	hsa-miR-1469	hsa-miR-1469
1065	hsa-miR-1470	7.763	8.09451	0.379224	8.38566	13.599	0.528438	GCCCUCCGCCCGUGCACCCCG	experimental		mature miRNA	standard	MIMAT0007348	hsa-miR-1470	hsa-miR-1470
1066	hsa-miR-1471	1.72697	6.62974	0.9051	1.35274	14.1413	0.848366	GCCCGCGUGUGGAGCCAGGUGU	experimental		mature miRNA	standard	MIMAT0007349	hsa-miR-1471	hsa-miR-1471
1067	hsa-miR-1537-3p	0.564348	7.38586	1	1.82938	14.5027	0.833789	AAAACCGUCUAGUUACAGUUGU	experimental		mature miRNA	standard	MIMAT0007399	hsa-miR-1537-3p	hsa-miR-1537-3p
1068	hsa-miR-1537-5p	0.0380718	7.59505	1	0.217263	15.75	0.926748	AGCUGUAAUUAGUCAGUUUUCU	experimental		mature miRNA	standard	MIMAT0026765	hsa-miR-1537-5p	hsa-miR-1537-5p
1069	hsa-miR-1538	3.43347	8.65766	0.784543	3.18161	16.912	0.834676	CGGCCCGGGCUGCUGCUGUUCCU	experimental		mature miRNA	standard	MIMAT0007400	hsa-miR-1538	hsa-miR-1538
1070	hsa-miR-1539	0.0306021	7.21885	1	0.0827099	13.2427	1	UCCUGCGCGUCCCAGAUGCCC	experimental		mature miRNA	standard	MIMAT0007401	hsa-miR-1539	hsa-miR-1539
1071	hsa-miR-1587	12.4541	11.3809	0.29605	19.4006	19.342	0.256771	UUGGGCUGGGCUGGGUUGGG	experimental		mature miRNA	standard	MIMAT0019077	hsa-miR-1587	hsa-miR-1587
1072	hsa-miR-1825	4.96218	8.00788	0.674329	6.6645	12.974	0.593053	UCCAGUGCCCUCCUCUCC	experimental		mature miRNA	standard	MIMAT0006765	hsa-miR-1825	hsa-miR-1825
1073	hsa-miR-1827	2.8916	8.33101	0.955421	0.691325	13.851	0.985842	UGAGGCAGUAGAUUGAAU	experimental		mature miRNA	standard	MIMAT0006767	hsa-miR-1827	hsa-miR-1827
1074	hsa-miR-1908-3p	2.63337	6.28224	0.941286	0.404473	13.9437	0.988755	CCGGCCGCCGGCUCCGCCCCG	experimental		mature miRNA	standard	MIMAT0026916	hsa-miR-1908-3p	hsa-miR-1908-3p
1075	hsa-miR-1908-5p	21.1432	8.91567	0.0306974	12.4555	15.0796	0.434832	CGGCGGGGACGGCGAUUGGUC	experimental		mature miRNA	standard	MIMAT0007881	hsa-miR-1908-5p	hsa-miR-1908-5p
1076	hsa-miR-1909-3p	0.0380718	6.95377	1	0.00262661	14.3468	1	CGCAGGGGCCGGGUGCUCACCG	experimental		mature miRNA	standard	MIMAT0007883	hsa-miR-1909-3p	hsa-miR-1909-3p
1077	hsa-miR-1909-5p	3.03096	7.41718	0.961474	0.00383869	13.3572	1	UGAGUGCCGGUGCCUGCCCUG	experimental		mature miRNA	standard	MIMAT0007882	hsa-miR-1909-5p	hsa-miR-1909-5p
1078	hsa-miR-1910-3p	14.505	11.2847	0.497244	0.300582	16.9223	1	GAGGCAGAAGCAGGAUGACA	experimental		mature miRNA	standard	MIMAT0026917	hsa-miR-1910-3p	hsa-miR-1910-3p
1079	hsa-miR-1910-5p	0.0380718	6.17877	1	0.00262661	13.2035	1	CCAGUCCUGUGCCUGCCGCCU	experimental		mature miRNA	standard	MIMAT0007884	hsa-miR-1910-5p	hsa-miR-1910-5p
1080	hsa-miR-1911-3p	1.11466	6.86714	0.925407	0.00369552	12.1437	1	CACCAGGCAUUGUGGUCUCC	experimental		mature miRNA	standard	MIMAT0007886	hsa-miR-1911-3p	hsa-miR-1911-3p
1081	hsa-miR-1911-5p	0.206215	6.85742	1	0.206763	14.3751	1	UGAGUACCGCCAUGUCUGUUGGG	experimental		mature miRNA	standard	MIMAT0007885	hsa-miR-1911-5p	hsa-miR-1911-5p
1082	hsa-miR-1912	0.0380718	6.48061	1	0.00262661	13.3386	1	UACCCAGAGCAUGCAGUGUGAA	experimental		mature miRNA	standard	MIMAT0007887	hsa-miR-1912	hsa-miR-1912
1083	hsa-miR-1913	4.21601	7.03572	0.564966	4.00655	13.5103	0.690662	UCUGCCCCCUCCGCUGCUGCCA	experimental		mature miRNA	standard	MIMAT0007888	hsa-miR-1913	hsa-miR-1913
1084	hsa-miR-1914-3p	1.52476	7.14582	1	0.215421	14.194	1	GGAGGGGUCCCGCACUGGGAGG	experimental		mature miRNA	standard	MIMAT0007890	hsa-miR-1914-3p	hsa-miR-1914-3p
1085	hsa-miR-1914-5p	9.75356	9.39509	0.558161	1.34014	12.6778	0.873607	CCCUGUGCCCGGCCCACUUCUG	experimental		mature miRNA	standard	MIMAT0007889	hsa-miR-1914-5p	hsa-miR-1914-5p
1086	hsa-miR-1915-3p	313.408	27.1522	3.06379e-29	318.377	32.9391	3.57436e-18	CCCCAGGGCGACGCGGCGGG	experimental		mature miRNA	standard	MIMAT0007892	hsa-miR-1915-3p	hsa-miR-1915-3p
1087	hsa-miR-1915-5p	2.13454	6.72739	1	0.00332098	11.255	1	ACCUUGCCUUGCUGCCCGGGCC	experimental		mature miRNA	standard	MIMAT0007891	hsa-miR-1915-5p	hsa-miR-1915-5p
1088	hsa-miR-1972	0.0380718	7.21401	1	0.00262661	13.5913	1	UCAGGCCAGGCACAGUGGCUCA	experimental		mature miRNA	standard	MIMAT0009447	hsa-miR-1972	hsa-miR-1972
1089	hsa-miR-1973	169.855	30.1758	1.01368e-08	173.095	35.2516	9.00533e-05	ACCGUGCAAAGGUAGCAUA	experimental		mature miRNA	standard	MIMAT0009448	hsa-miR-1973	hsa-miR-1973
1090	hsa-miR-1976	3.1934	7.19669	0.771843	2.47013	19.0871	0.945298	CCUCCUGCCCUCCUUGCUGU	experimental		mature miRNA	standard	MIMAT0009451	hsa-miR-1976	hsa-miR-1976
1091	hsa-miR-2052	1.95808	6.62547	1	1.75177	14.1611	0.791142	UGUUUUGAUAACAGUAAUGU	experimental		mature miRNA	standard	MIMAT0009977	hsa-miR-2052	hsa-miR-2052
1092	hsa-miR-2053	1.18298	6.37876	1	0.00262661	11.9772	1	GUGUUAAUUAAACCUCUAUUUAC	experimental		mature miRNA	standard	MIMAT0009978	hsa-miR-2053	hsa-miR-2053
1093	hsa-miR-2054	0.0380718	7.6197	1	0.00262661	12.6894	1	CUGUAAUAUAAAUUUAAUUUAUU	experimental		mature miRNA	standard	MIMAT0009979	hsa-miR-2054	hsa-miR-2054
1094	hsa-miR-2110	2.4602	7.67543	0.814683	1.60485	12.8425	1	UUGGGGAAACGGCCGCUGAGUG	experimental		mature miRNA	standard	MIMAT0010133	hsa-miR-2110	hsa-miR-2110
1095	hsa-miR-2113	1.22603	6.21497	0.97737	0.595482	12.509	1	AUUUGUGCUUGGCUCUGUCAC	experimental		mature miRNA	standard	MIMAT0009206	hsa-miR-2113	hsa-miR-2113
1096	hsa-miR-2114-3p	6.47384	7.58012	0.60279	0.663064	12.0904	0.964487	CGAGCCUCAAGCAAGGGACUU	experimental		mature miRNA	standard	MIMAT0011157	hsa-miR-2114-3p	hsa-miR-2114-3p
1097	hsa-miR-2114-5p	5.44344	6.70486	0.469244	2.50213	13.0881	0.90609	UAGUCCCUUCCUUGAAGCGGUC	experimental		mature miRNA	standard	MIMAT0011156	hsa-miR-2114-5p	hsa-miR-2114-5p
1098	hsa-miR-2115-3p	0.961867	6.40793	0.843345	1.16545	11.9039	0.863306	CAUCAGAAUUCAUGGAGGCUAG	experimental		mature miRNA	standard	MIMAT0011159	hsa-miR-2115-3p	hsa-miR-2115-3p
1099	hsa-miR-2115-5p	3.27835	6.51166	0.664022	2.05786	14.7871	0.849604	AGCUUCCAUGACUCCUGAUGGA	experimental		mature miRNA	standard	MIMAT0011158	hsa-miR-2115-5p	hsa-miR-2115-5p
1100	hsa-miR-2116-3p	5.50457	7.21434	0.479778	4.50551	13.6315	0.689862	CCUCCCAUGCCAAGAACUCCC	experimental		mature miRNA	standard	MIMAT0011161	hsa-miR-2116-3p	hsa-miR-2116-3p
1101	hsa-miR-2116-5p	4.94685	6.22372	0.539124	8.1252	24.527	0.709168	GGUUCUUAGCAUAGGAGGUCU	experimental		mature miRNA	standard	MIMAT0011160	hsa-miR-2116-5p	hsa-miR-2116-5p
1102	hsa-miR-2117	0.0228373	5.10792	1	1.1485	13.781	0.836846	UGUUCUCUUUGCCAAGGACAG	experimental		mature miRNA	standard	MIMAT0011162	hsa-miR-2117	hsa-miR-2117
1103	hsa-miR-2276-3p	0.0243879	7.11019	1	0.477399	13.5464	1	UCUGCAAGUGUCAGAGGCGAGG	experimental		mature miRNA	standard	MIMAT0011775	hsa-miR-2276-3p	hsa-miR-2276-3p
1104	hsa-miR-2276-5p	3.87522	9.05905	1	0.00262661	13.532	1	GCCCUCUGUCACCUUGCAGACG	experimental		mature miRNA	standard	MIMAT0026921	hsa-miR-2276-5p	hsa-miR-2276-5p
1105	hsa-miR-2277-3p	0.0380718	7.52179	1	0.841284	14.8467	1	UGACAGCGCCCUGCCUGGCUC	experimental		mature miRNA	standard	MIMAT0011777	hsa-miR-2277-3p	hsa-miR-2277-3p
1106	hsa-miR-2277-5p	0.820302	6.55242	1	1.35116	15.8848	0.928121	AGCGCGGGCUGAGCGCUGCCAGUC	experimental		mature miRNA	standard	MIMAT0017352	hsa-miR-2277-5p	hsa-miR-2277-5p
1107	hsa-miR-2278	2.46836	7.1507	0.915776	4.25386	15.3908	0.798147	GAGAGCAGUGUGUGUUGCCUGG	experimental		mature miRNA	standard	MIMAT0011778	hsa-miR-2278	hsa-miR-2278
1108	hsa-miR-2355-3p	2.7262	8.26963	1	0.871513	14.2559	0.9497	AUUGUCCUUGCUGUUUGGAGAU	experimental		mature miRNA	standard	MIMAT0017950	hsa-miR-2355-3p	hsa-miR-2355-3p
1109	hsa-miR-2355-5p	3.48273	6.62477	0.856019	1.34527	15.207	0.939995	AUCCCCAGAUACAAUGGACAA	experimental		mature miRNA	standard	MIMAT0016895	hsa-miR-2355-5p	hsa-miR-2355-5p
1110	hsa-miR-2392	9.54751	8.68654	0.377575	5.39921	16.2656	0.685402	UAGGAUGGGGGUGAGAGGUG	experimental		mature miRNA	standard	MIMAT0019043	hsa-miR-2392	hsa-miR-2392
1111	hsa-miR-2467-3p	8.55432	8.67731	0.381551	9.00426	16.9191	0.575316	AGCAGAGGCAGAGAGGCUCAGG	experimental		mature miRNA	standard	MIMAT0019953	hsa-miR-2467-3p	hsa-miR-2467-3p
1112	hsa-miR-2467-5p	3.14119	6.3517	0.815348	0.420149	16.1297	0.981695	UGAGGCUCUGUUAGCCUUGGCUC	experimental		mature miRNA	standard	MIMAT0019952	hsa-miR-2467-5p	hsa-miR-2467-5p
1113	hsa-miR-2681-3p	2.8119	8.9883	0.973072	0.00403444	14.3114	1	UAUCAUGGAGUUGGUAAAGCAC	experimental		mature miRNA	standard	MIMAT0013516	hsa-miR-2681-3p	hsa-miR-2681-3p
1114	hsa-miR-2681-5p	2.92425	8.88961	0.946876	0.741354	20.5813	0.920214	GUUUUACCACCUCCAGGAGACU	experimental		mature miRNA	standard	MIMAT0013515	hsa-miR-2681-5p	hsa-miR-2681-5p
1115	hsa-miR-2682-3p	1.04049	7.71327	1	0.00262661	14.5612	1	CGCCUCUUCAGCGCUGUCUUCC	experimental		mature miRNA	standard	MIMAT0013518	hsa-miR-2682-3p	hsa-miR-2682-3p
1116	hsa-miR-2682-5p	1.31949	7.37302	1	0.0038575	12.3642	1	CAGGCAGUGACUGUUCAGACGUC	experimental		mature miRNA	standard	MIMAT0013517	hsa-miR-2682-5p	hsa-miR-2682-5p
1117	hsa-miR-2861	221.657	38.9394	1.27978e-09	208.02	36.5323	2.02913e-07	GGGGCCUGGCGGUGGGCGG	experimental		mature miRNA	standard	MIMAT0013802	hsa-miR-2861	hsa-miR-2861
1118	hsa-miR-2909	1.22349	6.08313	1	1.31057	13.8444	0.855736	GUUAGGGCCAACAUCUCUUGG	experimental		mature miRNA	standard	MIMAT0013863	hsa-miR-2909	hsa-miR-2909
1119	hsa-miR-3064-3p	4.49059	9.8566	0.735417	1.67304	15.8597	0.943934	UUGCCACACUGCAACACCUUACA	experimental		mature miRNA	standard	MIMAT0019865	hsa-miR-3064-3p	hsa-miR-3064-3p
1120	hsa-miR-3064-5p	2.08837	6.89005	0.932736	0.302978	12.1817	1	UCUGGCUGUUGUGGUGUGCAA	experimental		mature miRNA	standard	MIMAT0019864	hsa-miR-3064-5p	hsa-miR-3064-5p
1121	hsa-miR-3065-3p	1.58511	7.82726	1	0.264527	14.3603	1	UCAGCACCAGGAUAUUGUUGGAG	experimental		mature miRNA	standard	MIMAT0015378	hsa-miR-3065-3p	hsa-miR-3065-3p
1122	hsa-miR-3065-5p	0.469993	7.88579	1	0.00262661	13.0927	1	UCAACAAAAUCACUGAUGCUGGA	experimental		mature miRNA	standard	MIMAT0015066	hsa-miR-3065-5p	hsa-miR-3065-5p
1123	hsa-miR-3074-3p	1.4096	6.43176	0.963988	0.00262661	11.8221	1	GAUAUCAGCUCAGUAGGCACCG	experimental		mature miRNA	standard	MIMAT0015027	hsa-miR-3074-3p	hsa-miR-3074-3p
1124	hsa-miR-3074-5p	4.44389	9.88616	1	0.00262661	14.1564	1	GUUCCUGCUGAACUGAGCCAG	experimental		mature miRNA	standard	MIMAT0019208	hsa-miR-3074-5p	hsa-miR-3074-5p
1125	hsa-miR-3115	1.42546	7.4829	1	0.878859	16.8698	0.992864	AUAUGGGUUUACUAGUUGGU	experimental		mature miRNA	standard	MIMAT0014977	hsa-miR-3115	hsa-miR-3115
1126	hsa-miR-3116	0.0237954	6.01856	1	2.1062	13.6216	0.678598	UGCCUGGAACAUAGUAGGGACU	experimental		mature miRNA	standard	MIMAT0014978	hsa-miR-3116	hsa-miR-3116
1127	hsa-miR-3117-3p	5.61932	8.90552	0.646153	0.968409	12.7524	0.946233	AUAGGACUCAUAUAGUGCCAG	experimental		mature miRNA	standard	MIMAT0014979	hsa-miR-3117-3p	hsa-miR-3117-3p
1128	hsa-miR-3117-5p	0.0220273	6.96343	1	1.87984	12.7903	0.736811	AGACACUAUACGAGUCAUAU	experimental		mature miRNA	standard	MIMAT0019197	hsa-miR-3117-5p	hsa-miR-3117-5p
1129	hsa-miR-3118	0.0380718	6.34209	1	0.00262661	13.6212	1	UGUGACUGCAUUAUGAAAAUUCU	experimental		mature miRNA	standard	MIMAT0014980	hsa-miR-3118	hsa-miR-3118
1130	hsa-miR-3119	0.668145	7.34951	1	0.00262661	14.2684	1	UGGCUUUUAACUUUGAUGGC	experimental		mature miRNA	standard	MIMAT0014981	hsa-miR-3119	hsa-miR-3119
1131	hsa-miR-3120-3p	0.0380718	7.2032	1	0.00262661	15.3958	1	CACAGCAAGUGUAGACAGGCA	experimental		mature miRNA	standard	MIMAT0014982	hsa-miR-3120-3p	hsa-miR-3120-3p
1132	hsa-miR-3120-5p	0.0380718	6.58421	1	0.00262661	15.4526	1	CCUGUCUGUGCCUGCUGUACA	experimental		mature miRNA	standard	MIMAT0019198	hsa-miR-3120-5p	hsa-miR-3120-5p
1133	hsa-miR-3121-3p	2.77188	7.99647	1	0.547896	14.6636	0.911202	UAAAUAGAGUAGGCAAAGGACA	experimental		mature miRNA	standard	MIMAT0014983	hsa-miR-3121-3p	hsa-miR-3121-3p
1134	hsa-miR-3121-5p	0.484451	7.60773	1	0.00262661	14.6393	1	UCCUUUGCCUAUUCUAUUUAAG	experimental		mature miRNA	standard	MIMAT0019199	hsa-miR-3121-5p	hsa-miR-3121-5p
1135	hsa-miR-3122	0.0380718	7.07296	1	0.00262661	14.7647	1	GUUGGGACAAGAGGACGGUCUU	experimental		mature miRNA	standard	MIMAT0014984	hsa-miR-3122	hsa-miR-3122
1136	hsa-miR-3123	0.0380718	8.17885	1	0.267557	14.229	0.974737	CAGAGAAUUGUUUAAUC	experimental		mature miRNA	standard	MIMAT0014985	hsa-miR-3123	hsa-miR-3123
1137	hsa-miR-3124-3p	4.39805	8.98223	0.934081	0.215658	15.4571	1	ACUUUCCUCACUCCCGUGAAGU	experimental		mature miRNA	standard	MIMAT0019200	hsa-miR-3124-3p	hsa-miR-3124-3p
1138	hsa-miR-3124-5p	2.67094	8.63393	1	0.688263	12.2802	1	UUCGCGGGCGAAGGCAAAGUC	experimental		mature miRNA	standard	MIMAT0014986	hsa-miR-3124-5p	hsa-miR-3124-5p
1139	hsa-miR-3125	3.80852	7.62107	0.751162	3.65491	15.0624	0.763695	UAGAGGAAGCUGUGGAGAGA	experimental		mature miRNA	standard	MIMAT0014988	hsa-miR-3125	hsa-miR-3125
1140	hsa-miR-3126-3p	7.12474	8.25399	0.521979	3.6345	17.2602	0.801117	CAUCUGGCAUCCGUCACACAGA	experimental		mature miRNA	standard	MIMAT0015377	hsa-miR-3126-3p	hsa-miR-3126-3p
1141	hsa-miR-3126-5p	20.2797	44.5612	0.785014	0.00416433	12.0578	1	UGAGGGACAGAUGCCAGAAGCA	experimental		mature miRNA	standard	MIMAT0014989	hsa-miR-3126-5p	hsa-miR-3126-5p
1142	hsa-miR-3127-3p	0.47935	7.14551	1	1.02513	21.2416	0.886433	UCCCCUUCUGCAGGCCUGCUGG	experimental		mature miRNA	standard	MIMAT0019201	hsa-miR-3127-3p	hsa-miR-3127-3p
1143	hsa-miR-3127-5p	2.27025	7.20723	0.846076	0.935484	13.2611	0.87856	AUCAGGGCUUGUGGAAUGGGAAG	experimental		mature miRNA	standard	MIMAT0014990	hsa-miR-3127-5p	hsa-miR-3127-5p
1144	hsa-miR-3128	3.74613	7.65416	0.839909	0.52199	14.3659	0.928601	UCUGGCAAGUAAAAAACUCUCAU	experimental		mature miRNA	standard	MIMAT0014991	hsa-miR-3128	hsa-miR-3128
1145	hsa-miR-3129-3p	3.25386	8.3834	0.930536	0.875252	12.7907	0.843576	AAACUAAUCUCUACACUGCUGC	experimental		mature miRNA	standard	MIMAT0019202	hsa-miR-3129-3p	hsa-miR-3129-3p
1146	hsa-miR-3129-5p	2.82647	6.17234	0.811327	0.820264	16.6429	0.881101	GCAGUAGUGUAGAGAUUGGUUU	experimental		mature miRNA	standard	MIMAT0014992	hsa-miR-3129-5p	hsa-miR-3129-5p
1147	hsa-miR-3130-3p	3.71558	6.98871	0.810169	0.581497	13.5677	1	GCUGCACCGGAGACUGGGUAA	experimental		mature miRNA	standard	MIMAT0014994	hsa-miR-3130-3p	hsa-miR-3130-3p
1148	hsa-miR-3130-5p	2.0949	7.57957	0.878832	1.47501	13.9894	0.822089	UACCCAGUCUCCGGUGCAGCC	experimental		mature miRNA	standard	MIMAT0014995	hsa-miR-3130-5p	hsa-miR-3130-5p
1149	hsa-miR-3131	1.49336	6.42462	0.964167	0.660087	12.2527	0.845009	UCGAGGACUGGUGGAAGGGCCUU	experimental		mature miRNA	standard	MIMAT0014996	hsa-miR-3131	hsa-miR-3131
1150	hsa-miR-3132	2.47277	6.27505	0.8064	0.755314	14.7337	0.860377	UGGGUAGAGAAGGAGCUCAGAGGA	experimental		mature miRNA	standard	MIMAT0014997	hsa-miR-3132	hsa-miR-3132
1151	hsa-miR-3133	1.82235	6.99248	0.990606	3.33847	15.0921	0.612024	UAAAGAACUCUUAAAACCCAAU	experimental		mature miRNA	standard	MIMAT0014998	hsa-miR-3133	hsa-miR-3133
1152	hsa-miR-3134	3.61246	9.55102	0.929339	2.18378	13.1935	0.709335	UGAUGGAUAAAAGACUACAUAUU	experimental		mature miRNA	standard	MIMAT0015000	hsa-miR-3134	hsa-miR-3134
1153	hsa-miR-3135a	1.82999	7.34514	1	0.291732	13.6702	0.886832	UGCCUAGGCUGAGACUGCAGUG	experimental		mature miRNA	standard	MIMAT0015001	hsa-miR-3135a	hsa-miR-3135a
1154	hsa-miR-3135b	7.2512	9.99429	0.515268	7.4023	16.3674	0.451549	GGCUGGAGCGAGUGCAGUGGUG	experimental		mature miRNA	standard	MIMAT0018985	hsa-miR-3135b	hsa-miR-3135b
1155	hsa-miR-3136-3p	0.025794	7.27625	1	1.35309	16.1593	0.800204	UGGCCCAACCUAUUCAGUUAGU	experimental		mature miRNA	standard	MIMAT0019203	hsa-miR-3136-3p	hsa-miR-3136-3p
1156	hsa-miR-3136-5p	1.35361	6.97684	1	1.2282	12.091	0.705148	CUGACUGAAUAGGUAGGGUCAUU	experimental		mature miRNA	standard	MIMAT0015003	hsa-miR-3136-5p	hsa-miR-3136-5p
1157	hsa-miR-3137	0.162722	7.49783	1	2.51385	15.2127	0.783341	UCUGUAGCCUGGGAGCAAUGGGGU	experimental		mature miRNA	standard	MIMAT0015005	hsa-miR-3137	hsa-miR-3137
1158	hsa-miR-3138	0.0209287	7.75399	1	4.07756	20.0349	0.693769	UGUGGACAGUGAGGUAGAGGGAGU	experimental		mature miRNA	standard	MIMAT0015006	hsa-miR-3138	hsa-miR-3138
1159	hsa-miR-3139	0.483065	7.69103	1	1.79625	16.1385	0.799099	UAGGAGCUCAACAGAUGCCUGUU	experimental		mature miRNA	standard	MIMAT0015007	hsa-miR-3139	hsa-miR-3139
1160	hsa-miR-3140-3p	0.0261337	7.55801	1	1.09255	14.0279	0.80543	AGCUUUUGGGAAUUCAGGUAGU	experimental		mature miRNA	standard	MIMAT0015008	hsa-miR-3140-3p	hsa-miR-3140-3p
1161	hsa-miR-3140-5p	8.55611	21.234	0.959716	1.38556	13.2352	0.828742	ACCUGAAUUACCAAAAGCUUU	experimental		mature miRNA	standard	MIMAT0019204	hsa-miR-3140-5p	hsa-miR-3140-5p
1162	hsa-miR-3141	79.0493	19.991	1.73025e-05	90.3066	25.0057	0.00479685	GAGGGCGGGUGGAGGAGGA	experimental		mature miRNA	standard	MIMAT0015010	hsa-miR-3141	hsa-miR-3141
1163	hsa-miR-3142	0.0236847	6.78542	1	0.983175	16.2827	0.859094	AAGGCCUUUCUGAACCUUCAGA	experimental		mature miRNA	standard	MIMAT0015011	hsa-miR-3142	hsa-miR-3142
1164	hsa-miR-3143	0.0230527	7.01688	1	1.04398	14.3043	0.857235	AUAACAUUGUAAAGCGCUUCUUUCG	experimental		mature miRNA	standard	MIMAT0015012	hsa-miR-3143	hsa-miR-3143
1165	hsa-miR-3144-3p	0.0246973	7.00118	1	0.891613	13.8678	0.975045	AUAUACCUGUUCGGUCUCUUUA	experimental		mature miRNA	standard	MIMAT0015015	hsa-miR-3144-3p	hsa-miR-3144-3p
1166	hsa-miR-3144-5p	0.0252783	8.25461	1	0.417248	13.6804	0.868722	AGGGGACCAAAGAGAUAUAUAG	experimental		mature miRNA	standard	MIMAT0015014	hsa-miR-3144-5p	hsa-miR-3144-5p
1167	hsa-miR-3145-3p	3.19466	7.90625	0.755441	6.51257	14.0246	0.538426	AGAUAUUUUGAGUGUUUGGAAUUG	experimental		mature miRNA	standard	MIMAT0015016	hsa-miR-3145-3p	hsa-miR-3145-3p
1168	hsa-miR-3145-5p	3.07318	9.3687	0.948725	1.13941	13.2226	0.783424	AACUCCAAACACUCAAAACUCA	experimental		mature miRNA	standard	MIMAT0019205	hsa-miR-3145-5p	hsa-miR-3145-5p
1169	hsa-miR-3146	1.11152	7.24535	0.965253	3.21679	14.9662	0.605518	CAUGCUAGGAUAGAAAGAAUGG	experimental		mature miRNA	standard	MIMAT0015018	hsa-miR-3146	hsa-miR-3146
1170	hsa-miR-3147	3.43268	8.73978	0.755937	7.06528	13.3869	0.54786	GGUUGGGCAGUGAGGAGGGUGUGA	experimental		mature miRNA	standard	MIMAT0015019	hsa-miR-3147	hsa-miR-3147
1171	hsa-miR-3148	0.938344	5.52021	0.9912	16.3455	25.1475	0.467402	UGGAAAAAACUGGUGUGUGCUU	experimental		mature miRNA	standard	MIMAT0015021	hsa-miR-3148	hsa-miR-3148
1172	hsa-miR-3149	29.1283	12.801	0.0164398	41.0427	21.7793	0.0785532	UUUGUAUGGAUAUGUGUGUGUAU	experimental		mature miRNA	standard	MIMAT0015022	hsa-miR-3149	hsa-miR-3149
1173	hsa-miR-3150a-3p	1.26371	6.98637	1	2.7954	12.3867	0.606476	CUGGGGAGAUCCUCGAGGUUGG	experimental		mature miRNA	standard	MIMAT0015023	hsa-miR-3150a-3p	hsa-miR-3150a-3p
1174	hsa-miR-3150a-5p	2.11401	7.8659	0.957822	7.05947	13.0074	0.41053	CAACCUCGACGAUCUCCUCAGC	experimental		mature miRNA	standard	MIMAT0019206	hsa-miR-3150a-5p	hsa-miR-3150a-5p
1175	hsa-miR-3150b-3p	4.23857	8.28613	0.698434	14.6192	25.7398	0.495919	UGAGGAGAUCGUCGAGGUUGG	experimental		mature miRNA	standard	MIMAT0018194	hsa-miR-3150b-3p	hsa-miR-3150b-3p
1176	hsa-miR-3150b-5p	1.98669	6.98893	0.838546	6.21935	14.8733	0.498629	CAACCUCGAGGAUCUCCCCAGC	experimental		mature miRNA	standard	MIMAT0019226	hsa-miR-3150b-5p	hsa-miR-3150b-5p
1177	hsa-miR-3151-3p	2.561	8.4889	0.904179	7.04008	13.0347	0.311325	CCUGAUCCCACAGCCCACCU	experimental		mature miRNA	standard	MIMAT0027026	hsa-miR-3151-3p	hsa-miR-3151-3p
1178	hsa-miR-3151-5p	1.22655	6.10886	0.856223	6.47708	14.865	0.457418	GGUGGGGCAAUGGGAUCAGGU	experimental		mature miRNA	standard	MIMAT0015024	hsa-miR-3151-5p	hsa-miR-3151-5p
1179	hsa-miR-3152-3p	0.359999	7.08237	0.967389	4.74914	12.7502	0.510983	UGUGUUAGAAUAGGGGCAAUAA	experimental		mature miRNA	standard	MIMAT0015025	hsa-miR-3152-3p	hsa-miR-3152-3p
1180	hsa-miR-3152-5p	1.52593	6.92368	0.868756	5.44643	13.3293	0.490588	AUUGCCUCUGUUCUAACACAAG	experimental		mature miRNA	standard	MIMAT0019207	hsa-miR-3152-5p	hsa-miR-3152-5p
1181	hsa-miR-3153	0.0202161	7.23251	1	4.84627	14.7094	0.432614	GGGGAAAGCGAGUAGGGACAUUU	experimental		mature miRNA	standard	MIMAT0015026	hsa-miR-3153	hsa-miR-3153
1182	hsa-miR-3154	0.367701	7.04147	1	1.29681	13.2092	1	CAGAAGGGGAGUUGGGAGCAGA	experimental		mature miRNA	standard	MIMAT0015028	hsa-miR-3154	hsa-miR-3154
1183	hsa-miR-3155a	0.0286479	5.8954	1	0.776224	11.9128	1	CCAGGCUCUGCAGUGGGAACU	experimental		mature miRNA	standard	MIMAT0015029	hsa-miR-3155a	hsa-miR-3155a
1184	hsa-miR-3155b	0.0380718	7.08795	1	0.00262661	14.0664	1	CCAGGCUCUGCAGUGGGA	experimental		mature miRNA	standard	MIMAT0019012	hsa-miR-3155b	hsa-miR-3155b
1185	hsa-miR-3156-3p	2.73109	6.46093	0.885947	4.08716	13.8311	0.714005	CUCCCACUUCCAGAUCUUUCU	experimental		mature miRNA	standard	MIMAT0019209	hsa-miR-3156-3p	hsa-miR-3156-3p
1186	hsa-miR-3156-5p	0.383447	6.73185	1	0.699532	15.7661	0.995865	AAAGAUCUGGAAGUGGGAGACA	experimental		mature miRNA	standard	MIMAT0015030	hsa-miR-3156-5p	hsa-miR-3156-5p
1187	hsa-miR-3157-3p	0.930716	7.16499	1	0.200218	14.5279	1	CUGCCCUAGUCUAGCUGAAGCU	experimental		mature miRNA	standard	MIMAT0019210	hsa-miR-3157-3p	hsa-miR-3157-3p
1188	hsa-miR-3157-5p	0.0380718	6.10649	1	0.226108	15.0391	1	UUCAGCCAGGCUAGUGCAGUCU	experimental		mature miRNA	standard	MIMAT0015031	hsa-miR-3157-5p	hsa-miR-3157-5p
1189	hsa-miR-3158-3p	0.0380718	5.7267	1	0.066322	12.7091	1	AAGGGCUUCCUCUCUGCAGGAC	experimental		mature miRNA	standard	MIMAT0015032	hsa-miR-3158-3p	hsa-miR-3158-3p
1190	hsa-miR-3158-5p	4.25382	7.86876	0.891395	0.00406071	12.5867	1	CCUGCAGAGAGGAAGCCCUUC	experimental		mature miRNA	standard	MIMAT0019211	hsa-miR-3158-5p	hsa-miR-3158-5p
1191	hsa-miR-3159	3.05702	7.15373	1	0.360882	16.2878	1	UAGGAUUACAAGUGUCGGCCAC	experimental		mature miRNA	standard	MIMAT0015033	hsa-miR-3159	hsa-miR-3159
1192	hsa-miR-3160-3p	1.85609	6.90163	0.996646	0.215256	14.967	1	AGAGCUGAGACUAGAAAGCCCA	experimental		mature miRNA	standard	MIMAT0015034	hsa-miR-3160-3p	hsa-miR-3160-3p
1193	hsa-miR-3160-5p	4.23325	8.23935	0.958012	0.0596491	13.0384	0.984177	GGCUUUCUAGUCUCAGCUCUCC	experimental		mature miRNA	standard	MIMAT0019212	hsa-miR-3160-5p	hsa-miR-3160-5p
1194	hsa-miR-3161	2.42572	7.29711	0.869493	1.87038	10.5755	0.913414	CUGAUAAGAACAGAGGCCCAGAU	experimental		mature miRNA	standard	MIMAT0015035	hsa-miR-3161	hsa-miR-3161
1195	hsa-miR-3162-3p	10.3759	7.79655	0.219547	19.6015	25.4357	0.385879	UCCCUACCCCUCCACUCCCCA	experimental		mature miRNA	standard	MIMAT0019213	hsa-miR-3162-3p	hsa-miR-3162-3p
1196	hsa-miR-3162-5p	25.636	12.6489	0.0364712	26.563	15.574	0.0750858	UUAGGGAGUAGAAGGGUGGGGAG	experimental		mature miRNA	standard	MIMAT0015036	hsa-miR-3162-5p	hsa-miR-3162-5p
1197	hsa-miR-3163	4.37169	7.03341	0.671731	6.96701	22.0966	0.657609	UAUAAAAUGAGGGCAGUAAGAC	experimental		mature miRNA	standard	MIMAT0015037	hsa-miR-3163	hsa-miR-3163
1198	hsa-miR-3164	3.45442	7.01291	0.758711	2.18576	15.9614	0.820321	UGUGACUUUAAGGGAAAUGGCG	experimental		mature miRNA	standard	MIMAT0015038	hsa-miR-3164	hsa-miR-3164
1199	hsa-miR-3165	2.9393	6.34654	0.823438	1.27151	11.951	0.883312	AGGUGGAUGCAAUGUGACCUCA	experimental		mature miRNA	standard	MIMAT0015039	hsa-miR-3165	hsa-miR-3165
1200	hsa-miR-3166	3.87932	7.74258	0.752318	1.82238	13.4574	0.801807	CGCAGACAAUGCCUACUGGCCUA	experimental		mature miRNA	standard	MIMAT0015040	hsa-miR-3166	hsa-miR-3166
1201	hsa-miR-3167	4.70181	6.04013	0.606535	4.82115	13.9527	0.610179	AGGAUUUCAGAAAUACUGGUGU	experimental		mature miRNA	standard	MIMAT0015042	hsa-miR-3167	hsa-miR-3167
1202	hsa-miR-3168	2.00756	7.96443	1	0.189992	13.7107	0.943165	GAGUUCUACAGUCAGAC	experimental		mature miRNA	standard	MIMAT0015043	hsa-miR-3168	hsa-miR-3168
1203	hsa-miR-3169	4.28241	6.95606	0.854715	0.506242	12.1258	0.986154	UAGGACUGUGCUUGGCACAUAG	experimental		mature miRNA	standard	MIMAT0015044	hsa-miR-3169	hsa-miR-3169
1204	hsa-miR-3170	5.79731	8.21408	0.759104	0.0670848	12.9585	1	CUGGGGUUCUGAGACAGACAGU	experimental		mature miRNA	standard	MIMAT0015045	hsa-miR-3170	hsa-miR-3170
1205	hsa-miR-3171	3.02305	7.14333	0.897958	0.698721	12.734	0.95573	AGAUGUAUGGAAUCUGUAUAUAUC	experimental		mature miRNA	standard	MIMAT0015046	hsa-miR-3171	hsa-miR-3171
1206	hsa-miR-3173-3p	4.65779	6.98724	0.732159	1.15235	15.4346	0.870828	AAAGGAGGAAAUAGGCAGGCCA	experimental		mature miRNA	standard	MIMAT0015048	hsa-miR-3173-3p	hsa-miR-3173-3p
1207	hsa-miR-3173-5p	2.86265	6.21197	0.909684	0.136178	10.9917	1	UGCCCUGCCUGUUUUCUCCUUU	experimental		mature miRNA	standard	MIMAT0019214	hsa-miR-3173-5p	hsa-miR-3173-5p
1208	hsa-miR-3174	9.66374	8.32931	0.341636	4.57189	14.2307	0.668409	UAGUGAGUUAGAGAUGCAGAGCC	experimental		mature miRNA	standard	MIMAT0015051	hsa-miR-3174	hsa-miR-3174
1209	hsa-miR-3175	6.16279	11.0915	0.795046	0.493331	13.0159	1	CGGGGAGAGAACGCAGUGACGU	experimental		mature miRNA	standard	MIMAT0015052	hsa-miR-3175	hsa-miR-3175
1210	hsa-miR-3176	2.57362	7.07491	1	0.00352257	10.8477	1	ACUGGCCUGGGACUACCGG	experimental		mature miRNA	standard	MIMAT0015053	hsa-miR-3176	hsa-miR-3176
1211	hsa-miR-3177-3p	0.203968	6.5427	1	0.0876459	13.7032	1	UGCACGGCACUGGGGACACGU	experimental		mature miRNA	standard	MIMAT0015054	hsa-miR-3177-3p	hsa-miR-3177-3p
1212	hsa-miR-3177-5p	2.65105	9.01404	1	1.35555	19.4364	0.986161	UGUGUACACACGUGCCAGGCGCU	experimental		mature miRNA	standard	MIMAT0019215	hsa-miR-3177-5p	hsa-miR-3177-5p
1213	hsa-miR-3178	652.981	66.0306	2.34615e-22	759.072	90.0428	2.17752e-12	GGGGCGCGGCCGGAUCG	experimental		mature miRNA	standard	MIMAT0015055	hsa-miR-3178	hsa-miR-3178
1214	hsa-miR-3179	0.0584591	7.44668	1	0.159348	14.9968	1	AGAAGGGGUGAAAUUUAAACGU	experimental		mature miRNA	standard	MIMAT0015056	hsa-miR-3179	hsa-miR-3179
1215	hsa-miR-3180-3p	0.0380718	6.81562	1	0.00262661	12.784	1	UGGGGCGGAGCUUCCGGAGGCC	experimental		mature miRNA	standard	MIMAT0015058	hsa-miR-3180-3p	hsa-miR-3180-3p
1216	hsa-miR-3180-5p	2.62341	5.80473	0.731729	0.899393	14.1868	0.883946	CUUCCAGACGCUCCGCCCCACGUCG	experimental		mature miRNA	standard	MIMAT0015057	hsa-miR-3180-5p	hsa-miR-3180-5p
1217	hsa-miR-3180	1.04525	6.94162	1	0.00262661	13.4516	1	UGGGGCGGAGCUUCCGGAG	experimental		mature miRNA	standard	MIMAT0018178	hsa-miR-3180	hsa-miR-3180
1218	hsa-miR-3181	21.8775	43.1914	0.750968	0.00472026	13.2286	1	AUCGGGCCCUCGGCGCCGG	experimental		mature miRNA	standard	MIMAT0015061	hsa-miR-3181	hsa-miR-3181
1219	hsa-miR-3182	0.604692	7.71697	0.986328	0.00262661	13.5658	1	GCUUCUGUAGUGUAGUC	experimental		mature miRNA	standard	MIMAT0015062	hsa-miR-3182	hsa-miR-3182
1220	hsa-miR-3183	4.28607	8.49276	0.744823	0.00417271	14.376	1	GCCUCUCUCGGAGUCGCUCGGA	experimental		mature miRNA	standard	MIMAT0015063	hsa-miR-3183	hsa-miR-3183
1221	hsa-miR-3184-3p	4.33614	7.62056	0.759821	1.02306	11.7926	0.853383	AAAGUCUCGCUCUCUGCCCCUCA	experimental		mature miRNA	standard	MIMAT0022731	hsa-miR-3184-3p	hsa-miR-3184-3p
1222	hsa-miR-3184-5p	0.0866281	6.60378	0.986749	0.225895	12.1425	0.917114	UGAGGGGCCUCAGACCGAGCUUUU	experimental		mature miRNA	standard	MIMAT0015064	hsa-miR-3184-5p	hsa-miR-3184-5p
1223	hsa-miR-3185	172.633	23.8161	3.21892e-14	133.15	32.999	0.000188872	AGAAGAAGGCGGUCGGUCUGCGG	experimental		mature miRNA	standard	MIMAT0015065	hsa-miR-3185	hsa-miR-3185
1224	hsa-miR-3186-3p	0.747786	6.81113	1	0.0477168	11.7122	1	UCACGCGGAGAGAUGGCUUUG	experimental		mature miRNA	standard	MIMAT0015068	hsa-miR-3186-3p	hsa-miR-3186-3p
1225	hsa-miR-3186-5p	3.67265	7.07736	0.757584	0.00382848	12.9385	1	CAGGCGUCUGUCUACGUGGCUU	experimental		mature miRNA	standard	MIMAT0015067	hsa-miR-3186-5p	hsa-miR-3186-5p
1226	hsa-miR-3187-3p	2.21646	6.10436	0.882851	0.902752	11.0238	0.860266	UUGGCCAUGGGGCUGCGCGG	experimental		mature miRNA	standard	MIMAT0015069	hsa-miR-3187-3p	hsa-miR-3187-3p
1227	hsa-miR-3187-5p	4.32281	8.89644	0.8462	0.495545	15.0544	0.941916	CCUGGGCAGCGUGUGGCUGAAGG	experimental		mature miRNA	standard	MIMAT0019216	hsa-miR-3187-5p	hsa-miR-3187-5p
1228	hsa-miR-3188	1.11342	6.11474	0.915007	1.03681	12.5739	0.886861	AGAGGCUUUGUGCGGAUACGGGG	experimental		mature miRNA	standard	MIMAT0015070	hsa-miR-3188	hsa-miR-3188
1229	hsa-miR-3189-3p	3.47516	7.23175	0.719872	1.74897	13.5731	0.982792	CCCUUGGGUCUGAUGGGGUAG	experimental		mature miRNA	standard	MIMAT0015071	hsa-miR-3189-3p	hsa-miR-3189-3p
1230	hsa-miR-3189-5p	0.0380718	5.9632	1	0.00262661	14.0935	1	UGCCCCAUCUGUGCCCUGGGUAGGA	experimental		mature miRNA	standard	MIMAT0019217	hsa-miR-3189-5p	hsa-miR-3189-5p
1231	hsa-miR-3190-3p	3.42799	7.12816	0.797437	0.074532	12.8193	1	UGUGGAAGGUAGACGGCCAGAGA	experimental		mature miRNA	standard	MIMAT0022839	hsa-miR-3190-3p	hsa-miR-3190-3p
1232	hsa-miR-3190-5p	1.66936	6.90365	0.887842	2.67931	20.407	0.878824	UCUGGCCAGCUACGUCCCCA	experimental		mature miRNA	standard	MIMAT0015073	hsa-miR-3190-5p	hsa-miR-3190-5p
1233	hsa-miR-3191-3p	0.700958	5.8366	1	0.00262661	12.94	1	UGGGGACGUAGCUGGCCAGACAG	experimental		mature miRNA	standard	MIMAT0015075	hsa-miR-3191-3p	hsa-miR-3191-3p
1234	hsa-miR-3191-5p	0.0380718	5.53714	1	0.00262661	13.3004	1	CUCUCUGGCCGUCUACCUUCCA	experimental		mature miRNA	standard	MIMAT0022732	hsa-miR-3191-5p	hsa-miR-3191-5p
1235	hsa-miR-3192-3p	2.54668	8.18119	0.984684	0.00348771	11.8154	1	CUCUGAUCGCCCUCUCAGCUC	experimental		mature miRNA	standard	MIMAT0027027	hsa-miR-3192-3p	hsa-miR-3192-3p
1236	hsa-miR-3192-5p	8.81147	8.11959	0.404634	4.40045	20.1499	0.766459	UCUGGGAGGUUGUAGCAGUGGAA	experimental		mature miRNA	standard	MIMAT0015076	hsa-miR-3192-5p	hsa-miR-3192-5p
1237	hsa-miR-3193	3.82141	6.52036	0.822312	0.00424301	13.6721	1	UCCUGCGUAGGAUCUGAGGAGU	experimental		mature miRNA	standard	MIMAT0015077	hsa-miR-3193	hsa-miR-3193
1238	hsa-miR-3194-3p	2.40303	6.83956	0.932779	0.00402765	11.7243	1	AGCUCUGCUGCUCACUGGCAGU	experimental		mature miRNA	standard	MIMAT0019218	hsa-miR-3194-3p	hsa-miR-3194-3p
1239	hsa-miR-3194-5p	3.2399	6.68996	0.997528	0.00409819	13.877	1	GGCCAGCCACCAGGAGGGCUG	experimental		mature miRNA	standard	MIMAT0015078	hsa-miR-3194-5p	hsa-miR-3194-5p
1240	hsa-miR-3195	320.784	31.85	1.36505e-23	388.046	69.4769	1.01954e-05	CGCGCCGGGCCCGGGUU	experimental		mature miRNA	standard	MIMAT0015079	hsa-miR-3195	hsa-miR-3195
1241	hsa-miR-3196	640.762	66.51	1.18767e-23	623.335	96.6534	4.01406e-07	CGGGGCGGCAGGGGCCUC	experimental		mature miRNA	standard	MIMAT0015080	hsa-miR-3196	hsa-miR-3196
1242	hsa-miR-3197	207.444	39.7988	3.10206e-08	545.501	71.4518	1.66605e-14	GGAGGCGCAGGCUCGGAAAGGCG	experimental		mature miRNA	standard	MIMAT0015082	hsa-miR-3197	hsa-miR-3197
1243	hsa-miR-3198	0.381231	5.83244	1	0.00262661	13.1145	1	GUGGAGUCCUGGGGAAUGGAGA	experimental		mature miRNA	standard	MIMAT0015083	hsa-miR-3198	hsa-miR-3198
1244	hsa-miR-3199	0.0380718	5.99664	1	0.00262661	13.5244	1	AGGGACUGCCUUAGGAGAAAGUU	experimental		mature miRNA	standard	MIMAT0015084	hsa-miR-3199	hsa-miR-3199
1245	hsa-miR-3200-3p	0.0380718	6.70849	1	0.00262661	14.7808	1	CACCUUGCGCUACUCAGGUCUG	experimental		mature miRNA	standard	MIMAT0015085	hsa-miR-3200-3p	hsa-miR-3200-3p
1246	hsa-miR-3200-5p	0.743872	7.5531	1	0.00262661	13.8341	1	AAUCUGAGAAGGCGCACAAGGU	experimental		mature miRNA	standard	MIMAT0017392	hsa-miR-3200-5p	hsa-miR-3200-5p
1247	hsa-miR-3201	0.0380718	6.68193	1	0.00262661	12.8882	1	GGGAUAUGAAGAAAAAU	experimental		mature miRNA	standard	MIMAT0015086	hsa-miR-3201	hsa-miR-3201
1248	hsa-miR-3202	3.33449	6.15496	0.736216	0.00406186	13.1658	1	UGGAAGGGAGAAGAGCUUUAAU	experimental		mature miRNA	standard	MIMAT0015089	hsa-miR-3202	hsa-miR-3202
1249	hsa-miR-3529-3p	2.84101	7.45687	0.798481	2.44676	13.7643	0.744029	AACAACAAAAUCACUAGUCUUCCA	experimental		mature miRNA	standard	MIMAT0022741	hsa-miR-3529-3p	hsa-miR-3529-3p
1250	hsa-miR-3529-5p	3.18165	5.83455	0.667247	3.88042	12.3622	0.657493	AGGUAGACUGGGAUUUGUUGUU	experimental		mature miRNA	standard	MIMAT0019828	hsa-miR-3529-5p	hsa-miR-3529-5p
1251	hsa-miR-3591-3p	16.2979	12.673	0.207363	12.7029	15.0418	0.343857	AAACACCAUUGUCACACUCCAC	experimental		mature miRNA	standard	MIMAT0019877	hsa-miR-3591-3p	hsa-miR-3591-3p
1252	hsa-miR-3591-5p	2.80397	6.93218	0.723282	2.3602	15.8374	0.793524	UUUAGUGUGAUAAUGGCGUUUGA	experimental		mature miRNA	standard	MIMAT0019876	hsa-miR-3591-5p	hsa-miR-3591-5p
1253	hsa-miR-3605-3p	0.759231	7.03754	0.928557	2.09628	13.8139	0.742654	CCUCCGUGUUACCUGUCCUCUAG	experimental		mature miRNA	standard	MIMAT0017982	hsa-miR-3605-3p	hsa-miR-3605-3p
1254	hsa-miR-3605-5p	1.0321	7.14175	0.884349	1.78789	14.1478	0.759243	UGAGGAUGGAUAGCAAGGAAGCC	experimental		mature miRNA	standard	MIMAT0017981	hsa-miR-3605-5p	hsa-miR-3605-5p
1255	hsa-miR-3606-3p	0.217998	5.85567	0.939416	0.354504	13.4242	0.989363	AAAAUUUCUUUCACUACUUAG	experimental		mature miRNA	standard	MIMAT0022965	hsa-miR-3606-3p	hsa-miR-3606-3p
1256	hsa-miR-3606-5p	2.30556	7.88163	1	0.58039	13.9167	0.920079	UUAGUGAAGGCUAUUUUAAUU	experimental		mature miRNA	standard	MIMAT0017983	hsa-miR-3606-5p	hsa-miR-3606-5p
1257	hsa-miR-3607-3p	21.9669	12.8162	0.070703	27.6246	19.3002	0.1518	ACUGUAAACGCUUUCUGAUG	experimental		mature miRNA	standard	MIMAT0017985	hsa-miR-3607-3p	hsa-miR-3607-3p
1258	hsa-miR-3607-5p	43.465	15.8499	0.00188687	85.1348	25.8652	0.0065751	GCAUGUGAUGAAGCAAAUCAGU	experimental		mature miRNA	standard	MIMAT0017984	hsa-miR-3607-5p	hsa-miR-3607-5p
1259	hsa-miR-3609	49.176	18.1788	0.00311281	46.998	21.5055	0.0776237	CAAAGUGAUGAGUAAUACUGGCUG	experimental		mature miRNA	standard	MIMAT0017986	hsa-miR-3609	hsa-miR-3609
1260	hsa-miR-3610	7.85284	8.51226	0.363725	4.77948	14.6516	0.632515	GAAUCGGAAAGGAGGCGCCG	experimental		mature miRNA	standard	MIMAT0017987	hsa-miR-3610	hsa-miR-3610
1261	hsa-miR-3611	5.18489	8.41849	0.719575	1.07792	13.7064	0.923818	UUGUGAAGAAAGAAAUUCUUA	experimental		mature miRNA	standard	MIMAT0017988	hsa-miR-3611	hsa-miR-3611
1262	hsa-miR-3612	1.09427	6.70346	0.832127	3.87144	14.2961	0.635169	AGGAGGCAUCUUGAGAAAUGGA	experimental		mature miRNA	standard	MIMAT0017989	hsa-miR-3612	hsa-miR-3612
1263	hsa-miR-3613-3p	27.2724	10.7853	0.00714649	29.182	17.9298	0.142145	ACAAAAAAAAAAGCCCAACCCUUC	experimental		mature miRNA	standard	MIMAT0017991	hsa-miR-3613-3p	hsa-miR-3613-3p
1264	hsa-miR-3613-5p	49.025	11.9526	3.85486e-06	57.5903	18.9733	0.00688888	UGUUGUACUUUUUUUUUUGUUC	experimental		mature miRNA	standard	MIMAT0017990	hsa-miR-3613-5p	hsa-miR-3613-5p
1265	hsa-miR-3614-3p	1.45591	6.82575	0.936851	1.63425	12.5565	0.722548	UAGCCUUCAGAUCUUGGUGUUUU	experimental		mature miRNA	standard	MIMAT0017993	hsa-miR-3614-3p	hsa-miR-3614-3p
1266	hsa-miR-3614-5p	9.88975	17.6066	0.731997	3.19761	13.9094	0.625692	CCACUUGGAUCUGAAGGCUGCCC	experimental		mature miRNA	standard	MIMAT0017992	hsa-miR-3614-5p	hsa-miR-3614-5p
1267	hsa-miR-3615	4.66196	8.05168	0.602681	7.25002	15.2386	0.480565	UCUCUCGGCUCCUCGCGGCUC	experimental		mature miRNA	standard	MIMAT0017994	hsa-miR-3615	hsa-miR-3615
1268	hsa-miR-3616-3p	1.89555	7.16913	0.776784	7.74664	15.4128	0.434479	CGAGGGCAUUUCAUGAUGCAGGC	experimental		mature miRNA	standard	MIMAT0017996	hsa-miR-3616-3p	hsa-miR-3616-3p
1269	hsa-miR-3616-5p	3.47031	7.47745	0.649856	7.76947	12.8121	0.428043	AUGAAGUGCACUCAUGAUAUGU	experimental		mature miRNA	standard	MIMAT0017995	hsa-miR-3616-5p	hsa-miR-3616-5p
1270	hsa-miR-3617-3p	0.671275	6.10373	0.883028	3.04248	13.3017	0.643463	CAUCAGCACCCUAUGUCCUUUCU	experimental		mature miRNA	standard	MIMAT0022966	hsa-miR-3617-3p	hsa-miR-3617-3p
1271	hsa-miR-3617-5p	2.61631	6.93823	0.688504	6.88927	15.1562	0.455199	AAAGACAUAGUUGCAAGAUGGG	experimental		mature miRNA	standard	MIMAT0017997	hsa-miR-3617-5p	hsa-miR-3617-5p
1272	hsa-miR-3618	1.34351	6.36096	0.861227	5.08816	16.5135	0.629126	UGUCUACAUUAAUGAAAAGAGC	experimental		mature miRNA	standard	MIMAT0017998	hsa-miR-3618	hsa-miR-3618
1273	hsa-miR-3619-3p	1.22816	7.90135	1	1.2849	16.3837	0.988126	GGGACCAUCCUGCCUGCUGUGG	experimental		mature miRNA	standard	MIMAT0019219	hsa-miR-3619-3p	hsa-miR-3619-3p
1274	hsa-miR-3619-5p	1.96255	8.82412	1	0.422999	16.2048	1	UCAGCAGGCAGGCUGGUGCAGC	experimental		mature miRNA	standard	MIMAT0017999	hsa-miR-3619-5p	hsa-miR-3619-5p
1275	hsa-miR-3620-3p	2.05236	6.92748	1	3.99151	14.6835	0.813573	UCACCCUGCAUCCCGCACCCAG	experimental		mature miRNA	standard	MIMAT0018001	hsa-miR-3620-3p	hsa-miR-3620-3p
1276	hsa-miR-3620-5p	19.1412	10.4068	0.127463	19.2074	21.6884	0.329613	GUGGGCUGGGCUGGGCUGGGCC	experimental		mature miRNA	standard	MIMAT0022967	hsa-miR-3620-5p	hsa-miR-3620-5p
1277	hsa-miR-3621	91.3226	30.1188	0.00186461	76.1123	29.9227	0.0304337	CGCGGGUCGGGGUCUGCAGG	experimental		mature miRNA	standard	MIMAT0018002	hsa-miR-3621	hsa-miR-3621
1278	hsa-miR-3622a-3p	4.43107	7.49421	0.810885	2.13857	15.5082	0.883975	UCACCUGACCUCCCAUGCCUGU	experimental		mature miRNA	standard	MIMAT0018004	hsa-miR-3622a-3p	hsa-miR-3622a-3p
1279	hsa-miR-3622a-5p	1.16544	6.46038	1	2.25782	12.1483	0.874635	CAGGCACGGGAGCUCAGGUGAG	experimental		mature miRNA	standard	MIMAT0018003	hsa-miR-3622a-5p	hsa-miR-3622a-5p
1280	hsa-miR-3622b-3p	3.14219	6.08207	0.918898	0.248854	13.8962	1	UCACCUGAGCUCCCGUGCCUG	experimental		mature miRNA	standard	MIMAT0018006	hsa-miR-3622b-3p	hsa-miR-3622b-3p
1281	hsa-miR-3622b-5p	4.51138	6.98581	0.751897	6.15667	14.9152	0.656393	AGGCAUGGGAGGUCAGGUGA	experimental		mature miRNA	standard	MIMAT0018005	hsa-miR-3622b-5p	hsa-miR-3622b-5p
1282	hsa-miR-3646	4.74337	6.88186	0.7244	7.10375	18.397	0.623222	AAAAUGAAAUGAGCCCAGCCCA	experimental		mature miRNA	standard	MIMAT0018065	hsa-miR-3646	hsa-miR-3646
1283	hsa-miR-3648	1.7186	7.99708	1	1.77447	14.8017	0.895726	AGCCGCGGGGAUCGCCGAGGG	experimental		mature miRNA	standard	MIMAT0018068	hsa-miR-3648	hsa-miR-3648
1284	hsa-miR-3649	1.38828	6.04758	1	1.99214	15.9058	0.87313	AGGGACCUGAGUGUCUAAG	experimental		mature miRNA	standard	MIMAT0018069	hsa-miR-3649	hsa-miR-3649
1285	hsa-miR-3650	3.45523	6.42083	0.830466	2.41652	13.1067	0.759603	AGGUGUGUCUGUAGAGUCC	experimental		mature miRNA	standard	MIMAT0018070	hsa-miR-3650	hsa-miR-3650
1286	hsa-miR-3651	13.8567	9.90282	0.298756	3.43562	14.8466	0.7166	CAUAGCCCGGUCGCUGGUACAUGA	experimental		mature miRNA	standard	MIMAT0018071	hsa-miR-3651	hsa-miR-3651
1287	hsa-miR-3652	6.95118	7.7413	0.490244	3.28139	12.0209	0.688678	CGGCUGGAGGUGUGAGGA	experimental		mature miRNA	standard	MIMAT0018072	hsa-miR-3652	hsa-miR-3652
1288	hsa-miR-3653	8.56546	7.5707	0.3796	2.26451	13.828	0.788024	CUAAGAAGUUGACUGAAG	experimental		mature miRNA	standard	MIMAT0018073	hsa-miR-3653	hsa-miR-3653
1289	hsa-miR-3654	2.67114	7.05531	0.839633	2.20157	15.3353	0.799508	GACUGGACAAGCUGAGGAA	experimental		mature miRNA	standard	MIMAT0018074	hsa-miR-3654	hsa-miR-3654
1290	hsa-miR-3655	3.35591	7.83207	0.949366	0.00397263	13.4253	0.977546	GCUUGUCGCUGCGGUGUUGCU	experimental		mature miRNA	standard	MIMAT0018075	hsa-miR-3655	hsa-miR-3655
1291	hsa-miR-3656	1845.49	116.182	5.16201e-59	1892.67	130.294	3.98903e-19	GGCGGGUGCGGGGGUGG	experimental		mature miRNA	standard	MIMAT0018076	hsa-miR-3656	hsa-miR-3656
1292	hsa-miR-3657	2.81462	7.15528	0.907937	0.00400575	13.1171	1	UGUGUCCCAUUAUUGGUGAUU	experimental		mature miRNA	standard	MIMAT0018077	hsa-miR-3657	hsa-miR-3657
1293	hsa-miR-3658	0.339741	6.1683	1	0.00317551	14.1871	1	UUUAAGAAAACACCAUGGAGAU	experimental		mature miRNA	standard	MIMAT0018078	hsa-miR-3658	hsa-miR-3658
1294	hsa-miR-3659	0.208111	6.69108	1	0.0053929	13.9619	0.961999	UGAGUGUUGUCUACGAGGGCA	experimental		mature miRNA	standard	MIMAT0018080	hsa-miR-3659	hsa-miR-3659
1295	hsa-miR-3660	0.0380718	6.44065	1	0.00262661	14.9607	1	ACUGACAGGAGAGCAUUUUGA	experimental		mature miRNA	standard	MIMAT0018081	hsa-miR-3660	hsa-miR-3660
1296	hsa-miR-3661	4.67209	10.4456	0.832154	3.13736	17.5972	0.744766	UGACCUGGGACUCGGACAGCUG	experimental		mature miRNA	standard	MIMAT0018082	hsa-miR-3661	hsa-miR-3661
1297	hsa-miR-3662	1.033	6.8829	1	0.00262661	14.7645	1	GAAAAUGAUGAGUAGUGACUGAUG	experimental		mature miRNA	standard	MIMAT0018083	hsa-miR-3662	hsa-miR-3662
1298	hsa-miR-3663-3p	6.36574	9.39787	0.795393	0.00439623	14.4093	0.997839	UGAGCACCACACAGGCCGGGCGC	experimental		mature miRNA	standard	MIMAT0018085	hsa-miR-3663-3p	hsa-miR-3663-3p
1299	hsa-miR-3663-5p	0.0380718	6.97132	1	0.0137897	15.572	1	GCUGGUCUGCGUGGUGCUCGG	experimental		mature miRNA	standard	MIMAT0018084	hsa-miR-3663-5p	hsa-miR-3663-5p
1300	hsa-miR-3664-3p	0.466576	7.89056	1	0.00262661	15.8236	1	UCUCAGGAGUAAAGACAGAGUU	experimental		mature miRNA	standard	MIMAT0019220	hsa-miR-3664-3p	hsa-miR-3664-3p
1301	hsa-miR-3664-5p	0.0380718	7.86152	1	0.00262661	15.2161	1	AACUCUGUCUUCACUCAUGAGU	experimental		mature miRNA	standard	MIMAT0018086	hsa-miR-3664-5p	hsa-miR-3664-5p
1302	hsa-miR-3665	5022.14	330.384	1.48452e-59	4909.78	260.585	7.29012e-43	AGCAGGUGCGGGGCGGCG	experimental		mature miRNA	standard	MIMAT0018087	hsa-miR-3665	hsa-miR-3665
1303	hsa-miR-3666	5.93836	8.32372	0.788433	0.198596	12.2886	0.936565	CAGUGCAAGUGUAGAUGCCGA	experimental		mature miRNA	standard	MIMAT0018088	hsa-miR-3666	hsa-miR-3666
1304	hsa-miR-3667-3p	9.32133	8.78312	0.656886	1.08911	14.8299	0.905313	ACCUUCCUCUCCAUGGGUCUUU	experimental		mature miRNA	standard	MIMAT0018090	hsa-miR-3667-3p	hsa-miR-3667-3p
1305	hsa-miR-3667-5p	8.35739	8.078	0.624684	0.900981	12.6335	0.909766	AAAGACCCAUUGAGGAGAAGGU	experimental		mature miRNA	standard	MIMAT0018089	hsa-miR-3667-5p	hsa-miR-3667-5p
1306	hsa-miR-3668	0.0726861	5.67379	1	0.686219	13.4428	0.852165	AAUGUAGAGAUUGAUCAAAAU	experimental		mature miRNA	standard	MIMAT0018091	hsa-miR-3668	hsa-miR-3668
1307	hsa-miR-3669	1.26479	6.71162	1	0.00262661	14.875	1	ACGGAAUAUGUAUACGGAAUAUA	experimental		mature miRNA	standard	MIMAT0018092	hsa-miR-3669	hsa-miR-3669
1308	hsa-miR-3670	0.0250241	6.44808	1	0.312275	13.8934	0.905966	AGAGCUCACAGCUGUCCUUCUCUA	experimental		mature miRNA	standard	MIMAT0018093	hsa-miR-3670	hsa-miR-3670
1309	hsa-miR-3671	1.9752	7.1627	0.880424	1.3888	15.9266	0.841732	AUCAAAUAAGGACUAGUCUGCA	experimental		mature miRNA	standard	MIMAT0018094	hsa-miR-3671	hsa-miR-3671
1310	hsa-miR-3672	3.3775	8.26173	1	0.317036	12.2654	0.992489	AUGAGACUCAUGUAAAACAUCUU	experimental		mature miRNA	standard	MIMAT0018095	hsa-miR-3672	hsa-miR-3672
1311	hsa-miR-3673	3.94332	6.84053	0.799295	0.00424522	11.4889	0.959081	AUGGAAUGUAUAUACGGAAUA	experimental		mature miRNA	standard	MIMAT0018096	hsa-miR-3673	hsa-miR-3673
1312	hsa-miR-3674	1.54286	6.94647	0.997718	0.889791	14.5439	0.810234	AUUGUAGAACCUAAGAUUGGCC	experimental		mature miRNA	standard	MIMAT0018097	hsa-miR-3674	hsa-miR-3674
1313	hsa-miR-3675-3p	4.95263	7.91116	0.593366	3.58569	14.3401	0.705377	CAUCUCUAAGGAACUCCCCCAA	experimental		mature miRNA	standard	MIMAT0018099	hsa-miR-3675-3p	hsa-miR-3675-3p
1314	hsa-miR-3675-5p	2.33673	6.28917	0.902284	0.390686	13.8249	0.905571	UAUGGGGCUUCUGUAGAGAUUUC	experimental		mature miRNA	standard	MIMAT0018098	hsa-miR-3675-5p	hsa-miR-3675-5p
1315	hsa-miR-3677-3p	2.61933	8.37697	1	0.00262661	12.8934	1	CUCGUGGGCUCUGGCCACGGCC	experimental		mature miRNA	standard	MIMAT0018101	hsa-miR-3677-3p	hsa-miR-3677-3p
1316	hsa-miR-3677-5p	0.0380718	5.9277	1	0.00262661	13.9232	1	CAGUGGCCAGAGCCCUGCAGUG	experimental		mature miRNA	standard	MIMAT0019221	hsa-miR-3677-5p	hsa-miR-3677-5p
1317	hsa-miR-3678-3p	1.00127	7.38459	1	0.00262661	14.2703	1	CUGCAGAGUUUGUACGGACCGG	experimental		mature miRNA	standard	MIMAT0018103	hsa-miR-3678-3p	hsa-miR-3678-3p
1318	hsa-miR-3678-5p	0.0380718	7.81158	1	0.00262661	14.6494	1	UCCGUACAAACUCUGCUGUG	experimental		mature miRNA	standard	MIMAT0018102	hsa-miR-3678-5p	hsa-miR-3678-5p
1319	hsa-miR-3679-3p	3.99727	7.70552	0.709792	1.61247	15.4621	0.925328	CUUCCCCCCAGUAAUCUUCAUC	experimental		mature miRNA	standard	MIMAT0018105	hsa-miR-3679-3p	hsa-miR-3679-3p
1320	hsa-miR-3679-5p	3.7599	8.1193	0.851764	0.00379329	15.2877	1	UGAGGAUAUGGCAGGGAAGGGGA	experimental		mature miRNA	standard	MIMAT0018104	hsa-miR-3679-5p	hsa-miR-3679-5p
1321	hsa-miR-3680-3p	0.0380718	7.07161	1	0.494456	13.1137	1	UUUUGCAUGACCCUGGGAGUAGG	experimental		mature miRNA	standard	MIMAT0018107	hsa-miR-3680-3p	hsa-miR-3680-3p
1322	hsa-miR-3680-5p	0.574009	8.65507	1	0.00330848	13.575	1	GACUCACUCACAGGAUUGUGCA	experimental		mature miRNA	standard	MIMAT0018106	hsa-miR-3680-5p	hsa-miR-3680-5p
1323	hsa-miR-3681-3p	2.82555	8.15557	1	0.00262661	18.5265	1	ACACAGUGCUUCAUCCACUACU	experimental		mature miRNA	standard	MIMAT0018109	hsa-miR-3681-3p	hsa-miR-3681-3p
1324	hsa-miR-3681-5p	0.271564	7.53249	1	0.836426	16.891	1	UAGUGGAUGAUGCACUCUGUGC	experimental		mature miRNA	standard	MIMAT0018108	hsa-miR-3681-5p	hsa-miR-3681-5p
1325	hsa-miR-3682-3p	0.541239	6.93469	1	0.0343479	13.7205	1	UGAUGAUACAGGUGGAGGUAG	experimental		mature miRNA	standard	MIMAT0018110	hsa-miR-3682-3p	hsa-miR-3682-3p
1326	hsa-miR-3682-5p	0.0380718	7.89338	1	0.00262661	15.7714	1	CUACUUCUACCUGUGUUAUCAU	experimental		mature miRNA	standard	MIMAT0019222	hsa-miR-3682-5p	hsa-miR-3682-5p
1327	hsa-miR-3683	5.50644	12.0557	1	0.00262661	15.7541	1	UGCGACAUUGGAAGUAGUAUCA	experimental		mature miRNA	standard	MIMAT0018111	hsa-miR-3683	hsa-miR-3683
1328	hsa-miR-3684	0.0380718	6.75682	1	0.00262661	15.2635	1	UUAGACCUAGUACACGUCCUU	experimental		mature miRNA	standard	MIMAT0018112	hsa-miR-3684	hsa-miR-3684
1329	hsa-miR-3685	0.0380718	7.80796	1	0.00262661	15.8241	1	UUUCCUACCCUACCUGAAGACU	experimental		mature miRNA	standard	MIMAT0018113	hsa-miR-3685	hsa-miR-3685
1330	hsa-miR-3686	4.03116	10.3658	1	0.028384	13.1642	1	AUCUGUAAGAGAAAGUAAAUGA	experimental		mature miRNA	standard	MIMAT0018114	hsa-miR-3686	hsa-miR-3686
1331	hsa-miR-3687	1.78073	5.78857	0.978815	0.65429	14.4809	1	CCCGGACAGGCGUUCGUGCGACGU	experimental		mature miRNA	standard	MIMAT0018115	hsa-miR-3687	hsa-miR-3687
1332	hsa-miR-3688-3p	0.732846	6.53183	1	1.19672	14.4579	0.934139	UAUGGAAAGACUUUGCCACUCU	experimental		mature miRNA	standard	MIMAT0018116	hsa-miR-3688-3p	hsa-miR-3688-3p
1333	hsa-miR-3688-5p	1.60977	5.94559	1	0.904285	15.4099	0.97305	AGUGGCAAAGUCUUUCCAUAU	experimental		mature miRNA	standard	MIMAT0019223	hsa-miR-3688-5p	hsa-miR-3688-5p
1334	hsa-miR-3689a-3p	2.23421	6.96961	1	1.44678	14.3072	0.89007	CUGGGAGGUGUGAUAUCGUGGU	experimental		mature miRNA	standard	MIMAT0018118	hsa-miR-3689a-3p	hsa-miR-3689a-3p
1335	hsa-miR-3689a-5p	1.84059	6.86557	1	0.00391265	13.6785	1	UGUGAUAUCAUGGUUCCUGGGA	experimental		mature miRNA	standard	MIMAT0018117,MIMAT0018180,MIMAT0019009	hsa-miR-3689a-5p	hsa-miR-3689a-5p, hsa-miR-3689b-5p, hsa-miR-3689e
1336	hsa-miR-3689b-3p	2.11212	7.77942	0.968065	1.57149	13.5119	0.831145	CUGGGAGGUGUGAUAUUGUGGU	experimental		mature miRNA	standard	MIMAT0018181,MIMAT0019007	hsa-miR-3689b-3p	hsa-miR-3689b-3p, hsa-miR-3689c
1337	hsa-miR-3689d	1.53587	6.17789	1	0.578396	13.5088	0.905411	GGGAGGUGUGAUCUCACACUCG	experimental		mature miRNA	standard	MIMAT0019008	hsa-miR-3689d	hsa-miR-3689d
1338	hsa-miR-3689f	0.46374	6.46139	1	1.26322	13.7216	0.782679	UGUGAUAUCGUGCUUCCUGGGA	experimental		mature miRNA	standard	MIMAT0019010	hsa-miR-3689f	hsa-miR-3689f
1339	hsa-miR-3690	0.0380718	7.47523	1	0.728161	13.5678	0.789907	ACCUGGACCCAGCGUAGACAAAG	experimental		mature miRNA	standard	MIMAT0018119	hsa-miR-3690	hsa-miR-3690
1340	hsa-miR-3691-3p	1.72088	7.71845	1	0.805372	13.282	0.865393	ACCAAGUCUGCGUCAUCCUCUC	experimental		mature miRNA	standard	MIMAT0019224	hsa-miR-3691-3p	hsa-miR-3691-3p
1341	hsa-miR-3691-5p	2.09612	6.41465	0.897846	3.24253	16.9901	0.708987	AGUGGAUGAUGGAGACUCGGUAC	experimental		mature miRNA	standard	MIMAT0018120	hsa-miR-3691-5p	hsa-miR-3691-5p
1342	hsa-miR-3692-3p	1.55226	7.24382	1	0.478374	12.1261	0.902884	GUUCCACACUGACACUGCAGAAGU	experimental		mature miRNA	standard	MIMAT0018122	hsa-miR-3692-3p	hsa-miR-3692-3p
1343	hsa-miR-3692-5p	1.75628	8.12441	1	2.5494	15.242	0.736092	CCUGCUGGUCAGGAGUGGAUACUG	experimental		mature miRNA	standard	MIMAT0018121	hsa-miR-3692-5p	hsa-miR-3692-5p
1344	hsa-miR-3713	1.52219	6.68827	1	0.00362906	14.4335	1	GGUAUCCGUUUGGGGAUGGU	experimental		mature miRNA	standard	MIMAT0018164	hsa-miR-3713	hsa-miR-3713
1345	hsa-miR-3714	3.8194	7.12651	0.701798	1.96062	13.267	0.861568	GAAGGCAGCAGUGCUCCCCUGU	experimental		mature miRNA	standard	MIMAT0018165	hsa-miR-3714	hsa-miR-3714
1346	hsa-miR-3907	3.01105	7.44596	0.845664	7.62727	18.5626	0.521873	AGGUGCUCCAGGCUGGCUCACA	experimental		mature miRNA	standard	MIMAT0018179	hsa-miR-3907	hsa-miR-3907
1347	hsa-miR-3908	0.646228	6.64003	0.966	6.66983	15.4187	0.485055	GAGCAAUGUAGGUAGACUGUUU	experimental		mature miRNA	standard	MIMAT0018182	hsa-miR-3908	hsa-miR-3908
1348	hsa-miR-3909	2.38614	7.48112	0.995031	2.6021	13.4376	0.779144	UGUCCUCUAGGGCCUGCAGUCU	experimental		mature miRNA	standard	MIMAT0018183	hsa-miR-3909	hsa-miR-3909
1349	hsa-miR-3910	0.438451	6.65743	1	10.1536	23.9706	0.603847	AAAGGCAUAAAACCAAGACA	experimental		mature miRNA	standard	MIMAT0018184	hsa-miR-3910	hsa-miR-3910
1350	hsa-miR-3911	0.14455	6.65009	1	5.65099	12.4068	0.519144	UGUGUGGAUCCUGGAGGAGGCA	experimental		mature miRNA	standard	MIMAT0018185	hsa-miR-3911	hsa-miR-3911
1351	hsa-miR-3912-3p	0.237816	6.36733	1	8.13018	18.4959	0.442658	UAACGCAUAAUAUGGACAUGU	experimental		mature miRNA	standard	MIMAT0018186	hsa-miR-3912-3p	hsa-miR-3912-3p
1352	hsa-miR-3912-5p	0.0632246	6.64507	1	5.21789	17.6247	0.528095	AUGUCCAUAUUAUGGGUUAGU	experimental		mature miRNA	standard	MIMAT0027036	hsa-miR-3912-5p	hsa-miR-3912-5p
1353	hsa-miR-3913-3p	0.246298	7.70057	0.957171	4.41309	14.1297	0.529052	AGACAUCAAGAUCAGUCCCAAA	experimental		mature miRNA	standard	MIMAT0019225	hsa-miR-3913-3p	hsa-miR-3913-3p
1354	hsa-miR-3913-5p	0.453185	6.69361	0.963742	4.90103	12.266	0.531575	UUUGGGACUGAUCUUGAUGUCU	experimental		mature miRNA	standard	MIMAT0018187	hsa-miR-3913-5p	hsa-miR-3913-5p
1355	hsa-miR-3914	0.189817	6.5106	1	5.70328	15.2945	0.515755	AAGGAACCAGAAAAUGAGAAGU	experimental		mature miRNA	standard	MIMAT0018188	hsa-miR-3914	hsa-miR-3914
1356	hsa-miR-3915	0.335017	6.07344	1	0.460413	14.6658	1	UUGAGGAAAAGAUGGUCUUAUU	experimental		mature miRNA	standard	MIMAT0018189	hsa-miR-3915	hsa-miR-3915
1357	hsa-miR-3916	0.218534	6.77058	1	1.15781	13.0747	0.960682	AAGAGGAAGAAAUGGCUGGUUCUCAG	experimental		mature miRNA	standard	MIMAT0018190	hsa-miR-3916	hsa-miR-3916
1358	hsa-miR-3917	1.71798	7.94416	1	1.31229	12.5873	0.973418	GCUCGGACUGAGCAGGUGGG	experimental		mature miRNA	standard	MIMAT0018191	hsa-miR-3917	hsa-miR-3917
1359	hsa-miR-3918	0.235717	6.47907	1	0.00262661	13.1561	1	ACAGGGCCGCAGAUGGAGACU	experimental		mature miRNA	standard	MIMAT0018192	hsa-miR-3918	hsa-miR-3918
1360	hsa-miR-3919	1.36189	6.56454	1	0.495426	14.3685	1	GCAGAGAACAAAGGACUCAGU	experimental		mature miRNA	standard	MIMAT0018193	hsa-miR-3919	hsa-miR-3919
1361	hsa-miR-3920	0.124035	6.61516	1	0.00262661	14.3712	1	ACUGAUUAUCUUAACUCUCUGA	experimental		mature miRNA	standard	MIMAT0018195	hsa-miR-3920	hsa-miR-3920
1362	hsa-miR-3921	0.523592	5.722	1	0.43339	16.4224	1	UCUCUGAGUACCAUAUGCCUUGU	experimental		mature miRNA	standard	MIMAT0018196	hsa-miR-3921	hsa-miR-3921
1363	hsa-miR-3922-3p	1.91512	7.34578	1	0.00262661	13.548	1	UCUGGCCUUGACUUGACUCUUU	experimental		mature miRNA	standard	MIMAT0018197	hsa-miR-3922-3p	hsa-miR-3922-3p
1364	hsa-miR-3922-5p	0.0380718	6.15803	1	0.11776	12.8782	1	UCAAGGCCAGAGGUCCCACAGCA	experimental		mature miRNA	standard	MIMAT0019227	hsa-miR-3922-5p	hsa-miR-3922-5p
1365	hsa-miR-3923	0.0380718	6.41139	1	0.0389614	15.1167	1	AACUAGUAAUGUUGGAUUAGGG	experimental		mature miRNA	standard	MIMAT0018198	hsa-miR-3923	hsa-miR-3923
1366	hsa-miR-3924	0.64031	6.59976	1	1.17075	16.2116	0.926759	AUAUGUAUAUGUGACUGCUACU	experimental		mature miRNA	standard	MIMAT0018199	hsa-miR-3924	hsa-miR-3924
1367	hsa-miR-3925-3p	2.5876	8.39887	1	0.00262661	11.9321	1	ACUCCAGUUUUAGUUCUCUUG	experimental		mature miRNA	standard	MIMAT0019228	hsa-miR-3925-3p	hsa-miR-3925-3p
1368	hsa-miR-3925-5p	0.807367	5.82384	1	0.00341406	12.2049	1	AAGAGAACUGAAAGUGGAGCCU	experimental		mature miRNA	standard	MIMAT0018200	hsa-miR-3925-5p	hsa-miR-3925-5p
1369	hsa-miR-3926	24.0747	26.6737	0.387166	7.98323	13.8352	0.54744	UGGCCAAAAAGCAGGCAGAGA	experimental		mature miRNA	standard	MIMAT0018201	hsa-miR-3926	hsa-miR-3926
1370	hsa-miR-3927-3p	4.65738	9.68574	0.87789	0.742488	12.5616	0.830496	CAGGUAGAUAUUUGAUAGGCAU	experimental		mature miRNA	standard	MIMAT0018202	hsa-miR-3927-3p	hsa-miR-3927-3p
1371	hsa-miR-3927-5p	4.97207	6.76162	0.767367	0.121081	11.7319	1	GCCUAUCACAUAUCUGCCUGU	experimental		mature miRNA	standard	MIMAT0022970	hsa-miR-3927-5p	hsa-miR-3927-5p
1372	hsa-miR-3928-3p	4.65491	7.31483	0.675782	0.22483	13.3374	0.959131	GGAGGAACCUUGGAGCUUCGGC	experimental		mature miRNA	standard	MIMAT0018205	hsa-miR-3928-3p	hsa-miR-3928-3p
1373	hsa-miR-3928-5p	6.6157	6.60353	0.413148	1.85487	12.3515	0.810365	UGAAGCUCUAAGGUUCCGCCUGC	experimental		mature miRNA	standard	MIMAT0027037	hsa-miR-3928-5p	hsa-miR-3928-5p
1374	hsa-miR-3929	1.70537	6.43353	0.971563	1.92037	12.5198	0.785108	GAGGCUGAUGUGAGUAGACCACU	experimental		mature miRNA	standard	MIMAT0018206	hsa-miR-3929	hsa-miR-3929
1375	hsa-miR-3934-3p	4.67815	5.47158	0.678007	0.00419493	11.9891	1	UGCUCAGGUUGCACAGCUGGGA	experimental		mature miRNA	standard	MIMAT0022975	hsa-miR-3934-3p	hsa-miR-3934-3p
1376	hsa-miR-3934-5p	3.25987	7.78817	0.811279	0.464972	11.6678	1	UCAGGUGUGGAAACUGAGGCAG	experimental		mature miRNA	standard	MIMAT0018349	hsa-miR-3934-5p	hsa-miR-3934-5p
1377	hsa-miR-3935	5.47845	8.27275	0.541536	3.92298	13.5288	0.720413	UGUAGAUACGAGCACCAGCCAC	experimental		mature miRNA	standard	MIMAT0018350	hsa-miR-3935	hsa-miR-3935
1378	hsa-miR-3936	6.38008	8.70673	0.650777	0.14197	12.2377	0.980413	UAAGGGGUGUAUGGCAGAUGCA	experimental		mature miRNA	standard	MIMAT0018351	hsa-miR-3936	hsa-miR-3936
1379	hsa-miR-3937	15.9237	8.92167	0.318966	1.02744	11.3189	0.859686	ACAGGCGGCUGUAGCAAUGGGGG	experimental		mature miRNA	standard	MIMAT0018352	hsa-miR-3937	hsa-miR-3937
1380	hsa-miR-3938	1.4192	7.25164	1	0.157975	13.1627	1	AAUUCCCUUGUAGAUAACCCGG	experimental		mature miRNA	standard	MIMAT0018353	hsa-miR-3938	hsa-miR-3938
1381	hsa-miR-3939	8.72365	6.80089	0.396777	0.45251	12.8499	0.937768	UACGCGCAGACCACAGGAUGUC	experimental		mature miRNA	standard	MIMAT0018355	hsa-miR-3939	hsa-miR-3939
1382	hsa-miR-3940-3p	2.78382	6.80513	0.853	0.693496	11.1075	0.903011	CAGCCCGGAUCCCAGCCCACUU	experimental		mature miRNA	standard	MIMAT0018356	hsa-miR-3940-3p	hsa-miR-3940-3p
1383	hsa-miR-3940-5p	779.988	74.5461	1.4032e-25	691.647	52.6836	5.42081e-34	GUGGGUUGGGGCGGGCUCUG	experimental		mature miRNA	standard	MIMAT0019229	hsa-miR-3940-5p	hsa-miR-3940-5p
1384	hsa-miR-3941	12.093	20.994	0.788869	0.00367755	12.324	1	UUACACACAACUGAGGAUCAUA	experimental		mature miRNA	standard	MIMAT0018357	hsa-miR-3941	hsa-miR-3941
1385	hsa-miR-3942-3p	0.509513	6.2462	1	0.00262661	15.7948	1	UUUCAGAUAACAGUAUUACAU	experimental		mature miRNA	standard	MIMAT0019230	hsa-miR-3942-3p	hsa-miR-3942-3p
1386	hsa-miR-3942-5p	0.0380718	6.5419	1	0.00262661	14.3395	1	AAGCAAUACUGUUACCUGAAAU	experimental		mature miRNA	standard	MIMAT0018358	hsa-miR-3942-5p	hsa-miR-3942-5p
1387	hsa-miR-3943	9.2494	8.55221	0.543083	0.117965	14.5643	1	UAGCCCCCAGGCUUCACUUGGCG	experimental		mature miRNA	standard	MIMAT0018359	hsa-miR-3943	hsa-miR-3943
1388	hsa-miR-3944-3p	0.0380718	5.96511	1	0.00262661	13.1757	1	UUCGGGCUGGCCUGCUGCUCCGG	experimental		mature miRNA	standard	MIMAT0018360	hsa-miR-3944-3p	hsa-miR-3944-3p
1389	hsa-miR-3944-5p	0.0380718	8.55621	1	0.00262661	14.7631	1	UGUGCAGCAGGCCAACCGAGA	experimental		mature miRNA	standard	MIMAT0019231	hsa-miR-3944-5p	hsa-miR-3944-5p
1390	hsa-miR-3945	3.65098	9.70214	1	0.0251656	12.8062	1	AGGGCAUAGGAGAGGGUUGAUAU	experimental		mature miRNA	standard	MIMAT0018361	hsa-miR-3945	hsa-miR-3945
1391	hsa-miR-3960	5714.67	313.941	5.29266e-66	5256.31	306.958	2.80626e-40	GGCGGCGGCGGAGGCGGGGG	experimental		mature miRNA	standard	MIMAT0019337	hsa-miR-3960	hsa-miR-3960
1392	hsa-miR-3972	3.39903	9.10906	0.849424	0.22597	11.999	1	CUGCCAGCCCCGUUCCAGGGCA	experimental		mature miRNA	standard	MIMAT0019357	hsa-miR-3972	hsa-miR-3972
1393	hsa-miR-3973	2.32101	8.19759	1	0.00262661	15.4826	1	ACAAAGUACAGCAUUAGCCUUAG	experimental		mature miRNA	standard	MIMAT0019358	hsa-miR-3973	hsa-miR-3973
1394	hsa-miR-3974	4.56028	9.86773	0.879112	0.00262661	13.9234	1	AAAGGUCAUUGUAAGGUUAAUGC	experimental		mature miRNA	standard	MIMAT0019359	hsa-miR-3974	hsa-miR-3974
1395	hsa-miR-3975	2.74046	6.99378	0.840399	0.00408892	15.7076	1	UGAGGCUAAUGCACUACUUCAC	experimental		mature miRNA	standard	MIMAT0019360	hsa-miR-3975	hsa-miR-3975
1396	hsa-miR-3976	1.20687	6.39621	0.967627	0.0788693	11.2401	1	UAUAGAGAGCAGGAAGAUUAAUGU	experimental		mature miRNA	standard	MIMAT0019361	hsa-miR-3976	hsa-miR-3976
1397	hsa-miR-3977	1.82708	7.01536	0.97358	0.00389054	13.2672	1	GUGCUUCAUCGUAAUUAACCUUA	experimental		mature miRNA	standard	MIMAT0019362	hsa-miR-3977	hsa-miR-3977
1398	hsa-miR-3978	1.17165	8.31448	1	0.00262661	13.9661	1	GUGGAAAGCAUGCAUCCAGGGUGU	experimental		mature miRNA	standard	MIMAT0019363	hsa-miR-3978	hsa-miR-3978
1399	hsa-miR-4251	0.0380718	5.42486	1	0.00262661	12.2184	1	CCUGAGAAAAGGGCCAA	experimental		mature miRNA	standard	MIMAT0016883	hsa-miR-4251	hsa-miR-4251
1400	hsa-miR-4252	2.94318	7.16918	0.991513	2.50112	25.1094	0.884121	GGCCACUGAGUCAGCACCA	experimental		mature miRNA	standard	MIMAT0016886	hsa-miR-4252	hsa-miR-4252
1401	hsa-miR-4253	14.263	11.1671	0.473167	0.788101	14.8363	1	AGGGCAUGUCCAGGGGGU	experimental		mature miRNA	standard	MIMAT0016882	hsa-miR-4253	hsa-miR-4253
1402	hsa-miR-4254	9.39684	8.06756	0.525584	0.00444005	12.9432	1	GCCUGGAGCUACUCCACCAUCUC	experimental		mature miRNA	standard	MIMAT0016884	hsa-miR-4254	hsa-miR-4254
1403	hsa-miR-4255	2.00947	7.5838	1	0.00262661	15.558	1	CAGUGUUCAGAGAUGGA	experimental		mature miRNA	standard	MIMAT0016885	hsa-miR-4255	hsa-miR-4255
1404	hsa-miR-4256	2.37826	7.86098	1	0.00262661	12.6201	1	AUCUGACCUGAUGAAGGU	experimental		mature miRNA	standard	MIMAT0016877	hsa-miR-4256	hsa-miR-4256
1405	hsa-miR-4257	0.0902536	6.69768	0.970988	0.00262661	12.731	1	CCAGAGGUGGGGACUGAG	experimental		mature miRNA	standard	MIMAT0016878	hsa-miR-4257	hsa-miR-4257
1406	hsa-miR-4258	5.4733	7.12362	0.477809	5.66694	14.8661	0.594344	CCCCGCCACCGCCUUGG	experimental		mature miRNA	standard	MIMAT0016879	hsa-miR-4258	hsa-miR-4258
1407	hsa-miR-4259	0.669725	6.51196	0.937218	0.00262661	12.8979	1	CAGUUGGGUCUAGGGGUCAGGA	experimental		mature miRNA	standard	MIMAT0016880	hsa-miR-4259	hsa-miR-4259
1408	hsa-miR-4260	3.15353	8.38489	0.918853	0.00262661	13.0584	1	CUUGGGGCAUGGAGUCCCA	experimental		mature miRNA	standard	MIMAT0016881	hsa-miR-4260	hsa-miR-4260
1409	hsa-miR-4261	3.12569	7.39376	0.899489	0.00403962	11.4707	1	AGGAAACAGGGACCCA	experimental		mature miRNA	standard	MIMAT0016890	hsa-miR-4261	hsa-miR-4261
1410	hsa-miR-4262	0.58166	6.68783	0.96662	0.00262661	11.0801	1	GACAUUCAGACUACCUG	experimental		mature miRNA	standard	MIMAT0016894	hsa-miR-4262	hsa-miR-4262
1411	hsa-miR-4263	0.0380718	6.80398	1	0.00262661	11.493	1	AUUCUAAGUGCCUUGGCC	experimental		mature miRNA	standard	MIMAT0016898	hsa-miR-4263	hsa-miR-4263
1412	hsa-miR-4264	3.30914	10.2665	1	0.00383524	13.9465	1	ACUCAGUCAUGGUCAUU	experimental		mature miRNA	standard	MIMAT0016899	hsa-miR-4264	hsa-miR-4264
1413	hsa-miR-4265	6.03176	12.4422	0.891577	0.00262661	12.4265	1	CUGUGGGCUCAGCUCUGGG	experimental		mature miRNA	standard	MIMAT0016891	hsa-miR-4265	hsa-miR-4265
1414	hsa-miR-4266	5.97675	9.12945	0.781938	0.00449835	11.5143	1	CUAGGAGGCCUUGGCC	experimental		mature miRNA	standard	MIMAT0016892	hsa-miR-4266	hsa-miR-4266
1415	hsa-miR-4267	2677.23	220.07	3.16319e-34	661.142	80.9201	6.1733e-12	UCCAGCUCGGUGGCAC	experimental		mature miRNA	standard	MIMAT0016893	hsa-miR-4267	hsa-miR-4267
1416	hsa-miR-4268	6.44988	6.18219	0.419909	1.0928	13.5643	1	GGCUCCUCCUCUCAGGAUGUG	experimental		mature miRNA	standard	MIMAT0016896	hsa-miR-4268	hsa-miR-4268
1417	hsa-miR-4269	9.28328	9.44967	0.597121	0.099777	11.5053	0.974835	GCAGGCACAGACAGCCCUGGC	experimental		mature miRNA	standard	MIMAT0016897	hsa-miR-4269	hsa-miR-4269
1418	hsa-miR-4270	6.05178	7.33599	0.465404	4.64732	14.1021	0.670508	UCAGGGAGUCAGGGGAGGGC	experimental		mature miRNA	standard	MIMAT0016900	hsa-miR-4270	hsa-miR-4270
1419	hsa-miR-4271	6.80275	6.08297	0.328832	4.78222	13.804	0.672183	GGGGGAAGAAAAGGUGGGG	experimental		mature miRNA	standard	MIMAT0016901	hsa-miR-4271	hsa-miR-4271
1420	hsa-miR-4272	3.38336	7.23269	0.80563	0.00419957	11.7784	1	CAUUCAACUAGUGAUUGU	experimental		mature miRNA	standard	MIMAT0016902	hsa-miR-4272	hsa-miR-4272
1421	hsa-miR-4273	6.87373	5.76684	0.535179	1.08658	13.6007	0.965421	GUGUUCUCUGAUGGACAG	experimental		mature miRNA	standard	MIMAT0016903	hsa-miR-4273	hsa-miR-4273
1422	hsa-miR-4274	11.7664	9.55058	0.223263	7.89152	14.1624	0.497019	CAGCAGUCCCUCCCCCUG	experimental		mature miRNA	standard	MIMAT0016906	hsa-miR-4274	hsa-miR-4274
1423	hsa-miR-4275	1.58894	6.88027	0.977383	0.00262661	11.4518	1	CCAAUUACCACUUCUUU	experimental		mature miRNA	standard	MIMAT0016905	hsa-miR-4275	hsa-miR-4275
1424	hsa-miR-4276	3.67529	8.55837	0.968664	0.998789	22.9261	0.924903	CUCAGUGACUCAUGUGC	experimental		mature miRNA	standard	MIMAT0016904	hsa-miR-4276	hsa-miR-4276
1425	hsa-miR-4277	3.17848	6.1634	0.759746	0.11878	13.8285	1	GCAGUUCUGAGCACAGUACAC	experimental		mature miRNA	standard	MIMAT0016908	hsa-miR-4277	hsa-miR-4277
1426	hsa-miR-4278	2.10472	6.36591	0.842546	0.00392573	11.9185	1	CUAGGGGGUUUGCCCUUG	experimental		mature miRNA	standard	MIMAT0016910	hsa-miR-4278	hsa-miR-4278
1427	hsa-miR-4279	2.9117	6.22004	0.650116	6.68391	12.7613	0.532077	CUCUCCUCCCGGCUUC	experimental		mature miRNA	standard	MIMAT0016909	hsa-miR-4279	hsa-miR-4279
1428	hsa-miR-4280	28.5888	14.1298	0.0326229	18.0186	16.5465	0.302317	GAGUGUAGUUCUGAGCAGAGC	experimental		mature miRNA	standard	MIMAT0016911	hsa-miR-4280	hsa-miR-4280
1429	hsa-miR-4281	713.968	61.9423	2.26678e-30	644.215	66.0479	1.03874e-15	GGGUCCCGGGGAGGGGGG	experimental		mature miRNA	standard	MIMAT0016907	hsa-miR-4281	hsa-miR-4281
1430	hsa-miR-4282	1.16206	6.4633	1	0.349273	14.9923	0.955134	UAAAAUUUGCAUCCAGGA	experimental		mature miRNA	standard	MIMAT0016912	hsa-miR-4282	hsa-miR-4282
1431	hsa-miR-4283	0.0380718	7.56202	1	0.756433	19.3287	0.90319	UGGGGCUCAGCGAGUUU	experimental		mature miRNA	standard	MIMAT0016914	hsa-miR-4283	hsa-miR-4283
1432	hsa-miR-4284	9.56088	10.7911	0.415458	3.14193	14.6949	0.751835	GGGCUCACAUCACCCCAU	experimental		mature miRNA	standard	MIMAT0016915	hsa-miR-4284	hsa-miR-4284
1433	hsa-miR-4285	0.0380718	7.43215	1	0.00262661	13.4064	1	GCGGCGAGUCCGACUCAU	experimental		mature miRNA	standard	MIMAT0016913	hsa-miR-4285	hsa-miR-4285
1434	hsa-miR-4286	47.1018	13.7833	0.000410267	30.0509	19.3745	0.190782	ACCCCACUCCUGGUACC	experimental		mature miRNA	standard	MIMAT0016916	hsa-miR-4286	hsa-miR-4286
1435	hsa-miR-4287	0.711614	6.53814	0.998121	0.072733	13.5892	1	UCUCCCUUGAGGGCACUUU	experimental		mature miRNA	standard	MIMAT0016917	hsa-miR-4287	hsa-miR-4287
1436	hsa-miR-4288	68.7032	16.8084	1.61759e-05	22.0294	17.2331	0.205558	UUGUCUGCUGAGUUUCC	experimental		mature miRNA	standard	MIMAT0016918	hsa-miR-4288	hsa-miR-4288
1437	hsa-miR-4289	62.8837	18.2136	0.000200095	39.0178	24.7861	0.182303	GCAUUGUGCAGGGCUAUCA	experimental		mature miRNA	standard	MIMAT0016920	hsa-miR-4289	hsa-miR-4289
1438	hsa-miR-4290	12.7883	9.29862	0.431492	0.00471095	13.2402	1	UGCCCUCCUUUCUUCCCUC	experimental		mature miRNA	standard	MIMAT0016921	hsa-miR-4290	hsa-miR-4290
1439	hsa-miR-4291	0.725559	6.19706	1	0.00262661	15.2296	1	UUCAGCAGGAACAGCU	experimental		mature miRNA	standard	MIMAT0016922	hsa-miR-4291	hsa-miR-4291
1440	hsa-miR-4292	5.54603	7.60454	0.585071	1.66464	16.2332	0.852855	CCCCUGGGCCGGCCUUGG	experimental		mature miRNA	standard	MIMAT0016919	hsa-miR-4292	hsa-miR-4292
1441	hsa-miR-4293	2.57866	8.35895	1	0.00262661	14.215	1	CAGCCUGACAGGAACAG	experimental		mature miRNA	standard	MIMAT0016848	hsa-miR-4293	hsa-miR-4293
1442	hsa-miR-4294	7.35631	9.54045	0.674433	0.00454018	12.9076	1	GGGAGUCUACAGCAGGG	experimental		mature miRNA	standard	MIMAT0016849	hsa-miR-4294	hsa-miR-4294
1443	hsa-miR-4295	0.851057	7.8217	0.962671	0.328822	12.5387	0.971863	CAGUGCAAUGUUUUCCUU	experimental		mature miRNA	standard	MIMAT0016844	hsa-miR-4295	hsa-miR-4295
1444	hsa-miR-4296	4.77286	6.58745	0.541065	3.66671	14.0306	0.756538	AUGUGGGCUCAGGCUCA	experimental		mature miRNA	standard	MIMAT0016845	hsa-miR-4296	hsa-miR-4296
1445	hsa-miR-4297	2.17706	5.86862	0.808246	3.9573	21.0529	0.838193	UGCCUUCCUGUCUGUG	experimental		mature miRNA	standard	MIMAT0016846	hsa-miR-4297	hsa-miR-4297
1446	hsa-miR-4298	22.5448	11.9249	0.0671163	24.765	16.1603	0.134644	CUGGGACAGGAGGAGGAGGCAG	experimental		mature miRNA	standard	MIMAT0016852	hsa-miR-4298	hsa-miR-4298
1447	hsa-miR-4299	2.76607	7.08593	0.776578	1.39985	14.6394	0.896776	GCUGGUGACAUGAGAGGC	experimental		mature miRNA	standard	MIMAT0016851	hsa-miR-4299	hsa-miR-4299
1448	hsa-miR-4300	3.77053	6.8725	0.865639	0.00417888	12.5757	1	UGGGAGCUGGACUACUUC	experimental		mature miRNA	standard	MIMAT0016853	hsa-miR-4300	hsa-miR-4300
1449	hsa-miR-4301	161.406	25.0865	9.74944e-12	123.781	26.8875	5.66068e-05	UCCCACUACUUCACUUGUGA	experimental		mature miRNA	standard	MIMAT0016850	hsa-miR-4301	hsa-miR-4301
1450	hsa-miR-4302	3.51006	6.79817	0.694524	1.8655	14.4267	0.820304	CCAGUGUGGCUCAGCGAG	experimental		mature miRNA	standard	MIMAT0016855	hsa-miR-4302	hsa-miR-4302
1451	hsa-miR-4303	0.686834	6.41346	0.970052	2.8301	13.9194	0.722305	UUCUGAGCUGAGGACAG	experimental		mature miRNA	standard	MIMAT0016856	hsa-miR-4303	hsa-miR-4303
1452	hsa-miR-4304	2.73511	7.58223	0.808148	1.83638	13.4059	0.835208	CCGGCAUGUCCAGGGCA	experimental		mature miRNA	standard	MIMAT0016854	hsa-miR-4304	hsa-miR-4304
1453	hsa-miR-4305	4.07525	6.04748	0.531225	4.61689	19.4631	0.727232	CCUAGACACCUCCAGUUC	experimental		mature miRNA	standard	MIMAT0016857	hsa-miR-4305	hsa-miR-4305
1454	hsa-miR-4306	105.845	25.0972	1.00506e-05	144.925	36.1646	0.00207566	UGGAGAGAAAGGCAGUA	experimental		mature miRNA	standard	MIMAT0016858	hsa-miR-4306	hsa-miR-4306
1455	hsa-miR-4307	2.93726	6.19806	0.671039	0.981379	11.56	0.846756	AAUGUUUUUUCCUGUUUCC	experimental		mature miRNA	standard	MIMAT0016860	hsa-miR-4307	hsa-miR-4307
1456	hsa-miR-4308	5.3949	6.64324	0.565775	0.598346	12.1164	0.87011	UCCCUGGAGUUUCUUCUU	experimental		mature miRNA	standard	MIMAT0016861	hsa-miR-4308	hsa-miR-4308
1457	hsa-miR-4309	0.847182	5.9235	0.897366	1.04844	13.9635	0.829644	CUGGAGUCUAGGAUUCCA	experimental		mature miRNA	standard	MIMAT0016859	hsa-miR-4309	hsa-miR-4309
1458	hsa-miR-4310	3.28881	6.12161	0.600417	5.72416	24.8446	0.76624	GCAGCAUUCAUGUCCC	experimental		mature miRNA	standard	MIMAT0016862	hsa-miR-4310	hsa-miR-4310
1459	hsa-miR-4311	3.7917	8.55539	0.916541	0.892405	13.1667	0.989293	GAAAGAGAGCUGAGUGUG	experimental		mature miRNA	standard	MIMAT0016863	hsa-miR-4311	hsa-miR-4311
1460	hsa-miR-4312	0.0234379	6.19263	1	1.21326	16.3276	0.860697	GGCCUUGUUCCUGUCCCCA	experimental		mature miRNA	standard	MIMAT0016864	hsa-miR-4312	hsa-miR-4312
1461	hsa-miR-4313	7.50124	7.46067	0.326167	9.63454	15.0982	0.489037	AGCCCCCUGGCCCCAAACCC	experimental		mature miRNA	standard	MIMAT0016865	hsa-miR-4313	hsa-miR-4313
1462	hsa-miR-4314	2.67913	8.6769	0.812037	2.68604	13.9867	0.713875	CUCUGGGAAAUGGGACAG	experimental		mature miRNA	standard	MIMAT0016868	hsa-miR-4314	hsa-miR-4314
1463	hsa-miR-4315	8.01883	16.1552	0.987784	0.0175462	13.8056	1	CCGCUUUCUGAGCUGGAC	experimental		mature miRNA	standard	MIMAT0016866	hsa-miR-4315	hsa-miR-4315
1464	hsa-miR-4316	1.47368	7.60985	0.887118	1.65296	11.9796	0.850423	GGUGAGGCUAGCUGGUG	experimental		mature miRNA	standard	MIMAT0016867	hsa-miR-4316	hsa-miR-4316
1465	hsa-miR-4317	838.228	62.2648	4.66784e-44	519.815	62.5011	1.82152e-23	ACAUUGCCAGGGAGUUU	experimental		mature miRNA	standard	MIMAT0016872	hsa-miR-4317	hsa-miR-4317
1466	hsa-miR-4318	6.03809	9.44125	0.60702	3.15343	13.87	0.68913	CACUGUGGGUACAUGCU	experimental		mature miRNA	standard	MIMAT0016869	hsa-miR-4318	hsa-miR-4318
1467	hsa-miR-4319	2.04321	6.77453	0.814207	3.75044	12.3298	0.653874	UCCCUGAGCAAAGCCAC	experimental		mature miRNA	standard	MIMAT0016870	hsa-miR-4319	hsa-miR-4319
1468	hsa-miR-4320	2.01714	6.69788	0.848249	0.400711	12.2574	0.971	GGGAUUCUGUAGCUUCCU	experimental		mature miRNA	standard	MIMAT0016871	hsa-miR-4320	hsa-miR-4320
1469	hsa-miR-4321	94.3237	19.3919	1.69007e-07	92.1815	41.5713	0.068891	UUAGCGGUGGACCGCCCUGCG	experimental		mature miRNA	standard	MIMAT0016874	hsa-miR-4321	hsa-miR-4321
1470	hsa-miR-4322	1.1785	6.20688	0.962888	9.3585	29.8055	0.616688	CUGUGGGCUCAGCGCGUGGGG	experimental		mature miRNA	standard	MIMAT0016873	hsa-miR-4322	hsa-miR-4322
1471	hsa-miR-4323	9.06512	8.01259	0.289021	3.53041	13.3116	0.721585	CAGCCCCACAGCCUCAGA	experimental		mature miRNA	standard	MIMAT0016875	hsa-miR-4323	hsa-miR-4323
1472	hsa-miR-4324	1069.47	145.913	5.26615e-14	874.524	72.9435	5.72321e-33	CCCUGAGACCCUAACCUUAA	experimental		mature miRNA	standard	MIMAT0016876	hsa-miR-4324	hsa-miR-4324
1473	hsa-miR-4325	31.8354	12.1072	0.00656395	26.3441	17.4935	0.0881271	UUGCACUUGUCUCAGUGA	experimental		mature miRNA	standard	MIMAT0016887	hsa-miR-4325	hsa-miR-4325
1474	hsa-miR-4326	5.23261	6.71576	0.455353	8.41154	14.0858	0.473619	UGUUCCUCUGUCUCCCAGAC	experimental		mature miRNA	standard	MIMAT0016888	hsa-miR-4326	hsa-miR-4326
1475	hsa-miR-4327	7.711	8.82237	0.584365	0.309594	13.2349	0.851384	GGCUUGCAUGGGGGACUGG	experimental		mature miRNA	standard	MIMAT0016889	hsa-miR-4327	hsa-miR-4327
1476	hsa-miR-4328	1.43401	6.85459	0.819136	3.99536	16.4205	0.651014	CCAGUUUUCCCAGGAUU	experimental		mature miRNA	standard	MIMAT0016926	hsa-miR-4328	hsa-miR-4328
1477	hsa-miR-4329	0.0380718	9.91374	1	0.471535	13.0607	1	CCUGAGACCCUAGUUCCAC	experimental		mature miRNA	standard	MIMAT0016923	hsa-miR-4329	hsa-miR-4329
1478	hsa-miR-4330	2.25447	8.07754	1	0.00262661	12.7365	1	CCUCAGAUCAGAGCCUUGC	experimental		mature miRNA	standard	MIMAT0016924	hsa-miR-4330	hsa-miR-4330
1479	hsa-miR-4417	1.71121	8.09528	1	1.45508	14.9353	0.965318	GGUGGGCUUCCCGGAGGG	experimental		mature miRNA	standard	MIMAT0018929	hsa-miR-4417	hsa-miR-4417
1480	hsa-miR-4418	0.743963	6.32879	1	0.00306501	14.1128	1	CACUGCAGGACUCAGCAG	experimental		mature miRNA	standard	MIMAT0018930	hsa-miR-4418	hsa-miR-4418
1481	hsa-miR-4419a	8.03182	8.40708	0.521972	3.82363	15.3995	0.839848	UGAGGGAGGAGACUGCA	experimental		mature miRNA	standard	MIMAT0018931	hsa-miR-4419a	hsa-miR-4419a
1482	hsa-miR-4419b	17.5632	10.7345	0.154447	11.2793	16.2472	0.573393	GAGGCUGAAGGAAGAUGG	experimental		mature miRNA	standard	MIMAT0019034	hsa-miR-4419b	hsa-miR-4419b
1483	hsa-miR-4420	4.1566	7.20886	0.828238	1.97349	13.1729	0.863813	GUCACUGAUGUCUGUAGCUGAG	experimental		mature miRNA	standard	MIMAT0018933	hsa-miR-4420	hsa-miR-4420
1484	hsa-miR-4421	5.57653	8.36256	0.88839	0.571263	12.4802	0.956248	ACCUGUCUGUGGAAAGGAGCUA	experimental		mature miRNA	standard	MIMAT0018934	hsa-miR-4421	hsa-miR-4421
1485	hsa-miR-4422	4.96203	7.38467	0.755466	1.23317	11.7493	0.89791	AAAAGCAUCAGGAAGUACCCA	experimental		mature miRNA	standard	MIMAT0018935	hsa-miR-4422	hsa-miR-4422
1486	hsa-miR-4423-3p	6.69322	10.4905	0.920573	0.958894	14.1533	0.975361	AUAGGCACCAAAAAGCAACAA	experimental		mature miRNA	standard	MIMAT0018936	hsa-miR-4423-3p	hsa-miR-4423-3p
1487	hsa-miR-4423-5p	5.23101	7.1191	0.735482	1.72252	13.5522	0.880996	AGUUGCCUUUUUGUUCCCAUGC	experimental		mature miRNA	standard	MIMAT0019232	hsa-miR-4423-5p	hsa-miR-4423-5p
1488	hsa-miR-4424	3.64655	6.71841	0.826321	3.4459	14.4243	0.7811	AGAGUUAACUCAAAAUGGACUA	experimental		mature miRNA	standard	MIMAT0018939	hsa-miR-4424	hsa-miR-4424
1489	hsa-miR-4425	4.92648	8.88369	0.822905	3.23304	14.0612	0.716485	UGUUGGGAUUCAGCAGGACCAU	experimental		mature miRNA	standard	MIMAT0018940	hsa-miR-4425	hsa-miR-4425
1490	hsa-miR-4426	6.77346	7.39214	0.540088	3.48093	12.3827	0.71505	GAAGAUGGACGUACUUU	experimental		mature miRNA	standard	MIMAT0018941	hsa-miR-4426	hsa-miR-4426
1491	hsa-miR-4427	2.91635	7.59724	0.884934	6.74375	14.0336	0.521893	UCUGAAUAGAGUCUGAAGAGU	experimental		mature miRNA	standard	MIMAT0018942	hsa-miR-4427	hsa-miR-4427
1492	hsa-miR-4428	5.27075	6.46661	0.689362	2.31212	12.6084	0.759643	CAAGGAGACGGGAACAUGGAGC	experimental		mature miRNA	standard	MIMAT0018943	hsa-miR-4428	hsa-miR-4428
1493	hsa-miR-4429	44.4905	12.6574	0.000124925	52.3678	21.6407	0.0476461	AAAAGCUGGGCUGAGAGGCG	experimental		mature miRNA	standard	MIMAT0018944	hsa-miR-4429	hsa-miR-4429
1494	hsa-miR-4430	5.39892	7.92314	0.637745	5.34556	13.7735	0.648381	AGGCUGGAGUGAGCGGAG	experimental		mature miRNA	standard	MIMAT0018945	hsa-miR-4430	hsa-miR-4430
1495	hsa-miR-4431	1.09645	8.42928	1	0.016254	12.786	0.998871	GCGACUCUGAAAACUAGAAGGU	experimental		mature miRNA	standard	MIMAT0018947	hsa-miR-4431	hsa-miR-4431
1496	hsa-miR-4432	2.88754	7.14804	0.960634	0.00414131	14.4954	1	AAAGACUCUGCAAGAUGCCU	experimental		mature miRNA	standard	MIMAT0018948	hsa-miR-4432	hsa-miR-4432
1497	hsa-miR-4433-3p	36.6761	12.4822	0.0028719	29.5846	17.4164	0.185783	ACAGGAGUGGGGGUGGGACAU	experimental		mature miRNA	standard	MIMAT0018949	hsa-miR-4433-3p	hsa-miR-4433-3p
1498	hsa-miR-4433-5p	13.674	8.00366	0.112384	11.7055	14.195	0.447782	CGUCCCACCCCCCACUCCUGU	experimental		mature miRNA	standard	MIMAT0020956	hsa-miR-4433-5p	hsa-miR-4433-5p
1499	hsa-miR-4433b-3p	58.3939	15.0084	1.84978e-05	58.1126	25.6817	0.0766562	CAGGAGUGGGGGGUGGGACGU	experimental		mature miRNA	standard	MIMAT0030414	hsa-miR-4433b-3p	hsa-miR-4433b-3p
1500	hsa-miR-4433b-5p	14.6984	8.33563	0.0891995	17.4394	16.6135	0.276205	AUGUCCCACCCCCACUCCUGU	experimental		mature miRNA	standard	MIMAT0030413	hsa-miR-4433b-5p	hsa-miR-4433b-5p
1501	hsa-miR-4434	1.62952	7.23549	0.947984	1.02341	15.0052	0.837971	AGGAGAAGUAAAGUAGAA	experimental		mature miRNA	standard	MIMAT0018950	hsa-miR-4434	hsa-miR-4434
1502	hsa-miR-4435	4.64982	11.2846	0.966185	0.0409025	13.6551	1	AUGGCCAGAGCUCACACAGAGG	experimental		mature miRNA	standard	MIMAT0018951	hsa-miR-4435	hsa-miR-4435
1503	hsa-miR-4436a	0.0852134	7.55871	1	0.00262661	15.6432	1	GCAGGACAGGCAGAAGUGGAU	experimental		mature miRNA	standard	MIMAT0018952	hsa-miR-4436a	hsa-miR-4436a
1504	hsa-miR-4436b-3p	4.22845	8.32248	0.844646	0.988556	14.7779	0.993558	CAGGGCAGGAAGAAGUGGACAA	experimental		mature miRNA	standard	MIMAT0019941	hsa-miR-4436b-3p	hsa-miR-4436b-3p
1505	hsa-miR-4436b-5p	3.61871	10.4225	1	0.00262661	15.4792	1	GUCCACUUCUGCCUGCCCUGCC	experimental		mature miRNA	standard	MIMAT0019940	hsa-miR-4436b-5p	hsa-miR-4436b-5p
1506	hsa-miR-4437	1.19163	7.78855	1	0.00262661	17.3381	1	UGGGCUCAGGGUACAAAGGUU	experimental		mature miRNA	standard	MIMAT0018953	hsa-miR-4437	hsa-miR-4437
1507	hsa-miR-4438	1.19163	8.64719	1	0.00262661	14.3141	1	CACAGGCUUAGAAAAGACAGU	experimental		mature miRNA	standard	MIMAT0018956	hsa-miR-4438	hsa-miR-4438
1508	hsa-miR-4439	2.26504	7.77063	1	0.00393368	14.4102	1	GUGACUGAUACCUUGGAGGCAU	experimental		mature miRNA	standard	MIMAT0018957	hsa-miR-4439	hsa-miR-4439
1509	hsa-miR-4440	0.0380718	6.82058	1	0.0367726	14.7348	1	UGUCGUGGGGCUUGCUGGCUUG	experimental		mature miRNA	standard	MIMAT0018958	hsa-miR-4440	hsa-miR-4440
1510	hsa-miR-4441	1.17577	7.18063	1	0.00262661	13.4289	1	ACAGGGAGGAGAUUGUA	experimental		mature miRNA	standard	MIMAT0018959	hsa-miR-4441	hsa-miR-4441
1511	hsa-miR-4442	9.89361	9.71479	0.369567	6.93872	17.358	0.589177	GCCGGACAAGAGGGAGG	experimental		mature miRNA	standard	MIMAT0018960	hsa-miR-4442	hsa-miR-4442
1512	hsa-miR-4443	770.721	54.2302	2.39037e-46	886.689	75.8686	4.77726e-11	UUGGAGGCGUGGGUUUU	experimental		mature miRNA	standard	MIMAT0018961	hsa-miR-4443	hsa-miR-4443
1513	hsa-miR-4444	5.96199	11.25	0.701306	2.33172	14.5738	0.853589	CUCGAGUUGGAAGAGGCG	experimental		mature miRNA	standard	MIMAT0018962	hsa-miR-4444	hsa-miR-4444
1514	hsa-miR-4445-3p	3.82055	9.07752	1	0.278258	12.8182	0.977322	CACGGCAAAAGAAACAAUCCA	experimental		mature miRNA	standard	MIMAT0018964	hsa-miR-4445-3p	hsa-miR-4445-3p
1515	hsa-miR-4445-5p	6.27056	10.581	0.708047	2.03999	13.5199	0.835579	AGAUUGUUUCUUUUGCCGUGCA	experimental		mature miRNA	standard	MIMAT0018963	hsa-miR-4445-5p	hsa-miR-4445-5p
1516	hsa-miR-4446-3p	1.08173	6.52516	0.958054	0.433382	14.474	0.957896	CAGGGCUGGCAGUGACAUGGGU	experimental		mature miRNA	standard	MIMAT0018965	hsa-miR-4446-3p	hsa-miR-4446-3p
1517	hsa-miR-4446-5p	3.62644	7.08064	0.685799	5.75576	13.7972	0.685882	AUUUCCCUGCCAUUCCCUUGGC	experimental		mature miRNA	standard	MIMAT0019233	hsa-miR-4446-5p	hsa-miR-4446-5p
1518	hsa-miR-4447	570.399	65.0394	1.26194e-18	456.359	59.641	1.80043e-23	GGUGGGGGCUGUUGUUU	experimental		mature miRNA	standard	MIMAT0018966	hsa-miR-4447	hsa-miR-4447
1519	hsa-miR-4448	16.1655	9.25315	0.106403	8.58473	15.3666	0.528099	GGCUCCUUGGUCUAGGGGUA	experimental		mature miRNA	standard	MIMAT0018967	hsa-miR-4448	hsa-miR-4448
1520	hsa-miR-4449	8.52988	8.68116	0.414391	2.95993	14.6637	0.788595	CGUCCCGGGGCUGCGCGAGGCA	experimental		mature miRNA	standard	MIMAT0018968	hsa-miR-4449	hsa-miR-4449
1521	hsa-miR-4450	0.573193	6.20747	1	1.39003	14.8257	0.788334	UGGGGAUUUGGAGAAGUGGUGA	experimental		mature miRNA	standard	MIMAT0018971	hsa-miR-4450	hsa-miR-4450
1522	hsa-miR-4451	8.12516	7.4999	0.384328	4.10195	14.3979	0.641634	UGGUAGAGCUGAGGACA	experimental		mature miRNA	standard	MIMAT0018973	hsa-miR-4451	hsa-miR-4451
1523	hsa-miR-4452	5.86445	11.8803	0.748638	4.4167	13.4639	0.516626	UUGAAUUCUUGGCCUUAAGUGAU	experimental		mature miRNA	standard	MIMAT0018974	hsa-miR-4452	hsa-miR-4452
1524	hsa-miR-4453	2.15742	7.21193	0.881437	14.7476	22.5223	0.402621	GAGCUUGGUCUGUAGCGGUU	experimental		mature miRNA	standard	MIMAT0018975	hsa-miR-4453	hsa-miR-4453
1525	hsa-miR-4454	110.397	19.9791	1.98897e-09	126.218	28.8503	0.00243587	GGAUCCGAGUCACGGCACCA	experimental		mature miRNA	standard	MIMAT0018976	hsa-miR-4454	hsa-miR-4454
1526	hsa-miR-4455	42.4096	16.5161	0.00577999	55.2885	21.651	0.018308	AGGGUGUGUGUGUUUUU	experimental		mature miRNA	standard	MIMAT0018977	hsa-miR-4455	hsa-miR-4455
1527	hsa-miR-4456	0.0203535	6.94424	1	4.90824	15.2022	0.508853	CCUGGUGGCUUCCUUUU	experimental		mature miRNA	standard	MIMAT0018978	hsa-miR-4456	hsa-miR-4456
1528	hsa-miR-4457	0.0229735	6.85865	1	2.3665	14.2465	0.650862	UCACAAGGUAUUGACUGGCGUA	experimental		mature miRNA	standard	MIMAT0018979	hsa-miR-4457	hsa-miR-4457
1529	hsa-miR-4458	1.64081	7.29827	1	3.95769	12.8455	0.582765	AGAGGUAGGUGUGGAAGAA	experimental		mature miRNA	standard	MIMAT0018980	hsa-miR-4458	hsa-miR-4458
1530	hsa-miR-4459	60.1147	16.4142	6.18559e-05	60.1116	20.5061	0.0593825	CCAGGAGGCGGAGGAGGUGGAG	experimental		mature miRNA	standard	MIMAT0018981	hsa-miR-4459	hsa-miR-4459
1531	hsa-miR-4460	3.44139	8.65773	1	1.79894	13.6134	0.809997	AUAGUGGUUGUGAAUUUACCUU	experimental		mature miRNA	standard	MIMAT0018982	hsa-miR-4460	hsa-miR-4460
1532	hsa-miR-4461	1.28681	7.02064	1	0.300141	12.9612	0.92406	GAUUGAGACUAGUAGGGCUAGGC	experimental		mature miRNA	standard	MIMAT0018983	hsa-miR-4461	hsa-miR-4461
1533	hsa-miR-4462	4.12822	6.97706	0.619517	7.06154	13.9251	0.604232	UGACACGGAGGGUGGCUUGGGAA	experimental		mature miRNA	standard	MIMAT0018986	hsa-miR-4462	hsa-miR-4462
1534	hsa-miR-4463	140.801	25.2053	1.69722e-09	156.549	45.5861	0.00323789	GAGACUGGGGUGGGGCC	experimental		mature miRNA	standard	MIMAT0018987	hsa-miR-4463	hsa-miR-4463
1535	hsa-miR-4464	0.0380718	8.40449	1	0.0126953	14.8896	1	AAGGUUUGGAUAGAUGCAAUA	experimental		mature miRNA	standard	MIMAT0018988	hsa-miR-4464	hsa-miR-4464
1536	hsa-miR-4465	0.0380718	5.65421	1	0.00262661	14.7267	1	CUCAAGUAGUCUGACCAGGGGA	experimental		mature miRNA	standard	MIMAT0018992	hsa-miR-4465	hsa-miR-4465
1537	hsa-miR-4466	564.623	46.4246	5.92547e-35	548.083	55.4367	3.09511e-10	GGGUGCGGGCCGGCGGGG	experimental		mature miRNA	standard	MIMAT0018993	hsa-miR-4466	hsa-miR-4466
1538	hsa-miR-4467	3.14937	8.32366	0.773404	4.64937	15.8701	0.699177	UGGCGGCGGUAGUUAUGGGCUU	experimental		mature miRNA	standard	MIMAT0018994	hsa-miR-4467	hsa-miR-4467
1539	hsa-miR-4468	2.22154	7.4108	0.930077	2.66454	17.7322	0.824955	AGAGCAGAAGGAUGAGAU	experimental		mature miRNA	standard	MIMAT0018995	hsa-miR-4468	hsa-miR-4468
1540	hsa-miR-4469	0.531207	8.44666	1	1.20545	12.224	0.827097	GCUCCCUCUAGGGUCGCUCGGA	experimental		mature miRNA	standard	MIMAT0018996	hsa-miR-4469	hsa-miR-4469
1541	hsa-miR-4470	1.24854	7.01713	0.914282	3.18039	17.9203	0.789634	UGGCAAACGUGGAAGCCGAGA	experimental		mature miRNA	standard	MIMAT0018997	hsa-miR-4470	hsa-miR-4470
1542	hsa-miR-4471	0.17909	5.96766	1	1.5442	16.1297	0.821794	UGGGAACUUAGUAGAGGUUUAA	experimental		mature miRNA	standard	MIMAT0018998	hsa-miR-4471	hsa-miR-4471
1543	hsa-miR-4472	295.949	39.2224	1.49268e-14	257.553	54.1706	3.11107e-07	GGUGGGGGGUGUUGUUUU	experimental		mature miRNA	standard	MIMAT0018999	hsa-miR-4472	hsa-miR-4472
1544	hsa-miR-4473	3.69656	7.95793	0.848708	0.00411536	14.6319	1	CUAGUGCUCUCCGUUACAAGUA	experimental		mature miRNA	standard	MIMAT0019000	hsa-miR-4473	hsa-miR-4473
1545	hsa-miR-4474-3p	0.842641	6.52472	1	0.0633974	14.7728	0.955574	UUGUGGCUGGUCAUGAGGCUAA	experimental		mature miRNA	standard	MIMAT0019001	hsa-miR-4474-3p	hsa-miR-4474-3p
1546	hsa-miR-4474-5p	3.23799	8.83312	1	0.33494	14.7552	0.981443	UUAGUCUCAUGAUCAGACACA	experimental		mature miRNA	standard	MIMAT0019234	hsa-miR-4474-5p	hsa-miR-4474-5p
1547	hsa-miR-4475	0.023857	5.96442	1	0.868755	13.3393	0.829647	CAAGGGACCAAGCAUUCAUUAU	experimental		mature miRNA	standard	MIMAT0019002	hsa-miR-4475	hsa-miR-4475
1548	hsa-miR-4476	1.988	7.00338	1	0.582091	13.3917	0.882211	CAGGAAGGAUUUAGGGACAGGC	experimental		mature miRNA	standard	MIMAT0019003	hsa-miR-4476	hsa-miR-4476
1549	hsa-miR-4477a	0.0219468	6.50293	1	2.46363	19.7294	0.728918	CUAUUAAGGACAUUUGUGAUUC	experimental		mature miRNA	standard	MIMAT0019004	hsa-miR-4477a	hsa-miR-4477a
1550	hsa-miR-4477b	0.907822	6.71066	1	1.68366	12.1633	0.776815	AUUAAGGACAUUUGUGAUUGAU	experimental		mature miRNA	standard	MIMAT0019005	hsa-miR-4477b	hsa-miR-4477b
1551	hsa-miR-4478	7.71202	8.7453	0.428556	5.24978	14.905	0.696014	GAGGCUGAGCUGAGGAG	experimental		mature miRNA	standard	MIMAT0019006	hsa-miR-4478	hsa-miR-4478
1552	hsa-miR-4479	4.77073	9.29865	0.71863	1.20691	13.6488	0.926073	CGCGCGGCCGUGCUCGGAGCAG	experimental		mature miRNA	standard	MIMAT0019011	hsa-miR-4479	hsa-miR-4479
1553	hsa-miR-4480	0.541239	6.49037	1	0.515035	13.8683	0.85416	AGCCAAGUGGAAGUUACUUUA	experimental		mature miRNA	standard	MIMAT0019014	hsa-miR-4480	hsa-miR-4480
1554	hsa-miR-4481	4.6395	6.36617	0.549787	6.45522	15.6268	0.59803	GGAGUGGGCUGGUGGUU	experimental		mature miRNA	standard	MIMAT0019015	hsa-miR-4481	hsa-miR-4481
1555	hsa-miR-4482-3p	6.45266	8.65927	0.691217	0.564254	11.8313	0.90766	UUUCUAUUUCUCAGUGGGGCUC	experimental		mature miRNA	standard	MIMAT0020958	hsa-miR-4482-3p	hsa-miR-4482-3p
1556	hsa-miR-4482-5p	0.0380718	6.68259	1	0.517219	15.7688	0.856395	AACCCAGUGGGCUAUGGAAAUG	experimental		mature miRNA	standard	MIMAT0019016	hsa-miR-4482-5p	hsa-miR-4482-5p
1557	hsa-miR-4483	0.0380718	7.04295	1	0.0189823	12.5032	1	GGGGUGGUCUGUUGUUG	experimental		mature miRNA	standard	MIMAT0019017	hsa-miR-4483	hsa-miR-4483
1558	hsa-miR-4484	68.5123	19.8534	0.000234609	45.5208	17.8505	0.0643733	AAAAGGCGGGAGAAGCCCCA	experimental		mature miRNA	standard	MIMAT0019018	hsa-miR-4484	hsa-miR-4484
1559	hsa-miR-4485	14.4307	9.4561	0.131796	17.4566	16.7725	0.352499	UAACGGCCGCGGUACCCUAA	experimental		mature miRNA	standard	MIMAT0019019	hsa-miR-4485	hsa-miR-4485
1560	hsa-miR-4486	9.71218	8.42138	0.300449	7.83072	17.0002	0.611818	GCUGGGCGAGGCUGGCA	experimental		mature miRNA	standard	MIMAT0019020	hsa-miR-4486	hsa-miR-4486
1561	hsa-miR-4487	1.66829	7.10763	1	0.265304	13.6367	0.98233	AGAGCUGGCUGAAGGGCAG	experimental		mature miRNA	standard	MIMAT0019021	hsa-miR-4487	hsa-miR-4487
1562	hsa-miR-4488	1917.23	112.043	2.51639e-66	2185.56	170.549	4.36581e-12	AGGGGGCGGGCUCCGGCG	experimental		mature miRNA	standard	MIMAT0019022	hsa-miR-4488	hsa-miR-4488
1563	hsa-miR-4489	0.0380718	6.52333	1	0.00262661	13.268	1	UGGGGCUAGUGAUGCAGGACG	experimental		mature miRNA	standard	MIMAT0019023	hsa-miR-4489	hsa-miR-4489
1564	hsa-miR-4490	0.0380718	6.88989	1	0.00262661	13.5842	1	UCUGGUAAGAGAUUUGGGCAUA	experimental		mature miRNA	standard	MIMAT0019025	hsa-miR-4490	hsa-miR-4490
1565	hsa-miR-4491	0.0380718	7.05482	1	0.00262661	13.6954	1	AAUGUGGACUGGUGUGACCAAA	experimental		mature miRNA	standard	MIMAT0019026	hsa-miR-4491	hsa-miR-4491
1566	hsa-miR-4492	151.066	30.2116	1.05206e-07	185.115	44.3887	0.00284037	GGGGCUGGGCGCGCGCC	experimental		mature miRNA	standard	MIMAT0019027	hsa-miR-4492	hsa-miR-4492
1567	hsa-miR-4493	0.0380718	7.0937	1	0.00262661	14.2875	1	AGAAGGCCUUUCCAUCUCUGU	experimental		mature miRNA	standard	MIMAT0019028	hsa-miR-4493	hsa-miR-4493
1568	hsa-miR-4494	0.0380718	7.74905	1	0.271626	12.7796	1	CCAGACUGUGGCUGACCAGAGG	experimental		mature miRNA	standard	MIMAT0019029	hsa-miR-4494	hsa-miR-4494
1569	hsa-miR-4495	0.0380718	7.05115	1	0.0556334	14.7664	1	AAUGUAAACAGGCUUUUUGCU	experimental		mature miRNA	standard	MIMAT0019030	hsa-miR-4495	hsa-miR-4495
1570	hsa-miR-4496	0.0380718	7.21102	1	0.365905	14.662	1	GAGGAAACUGAAGCUGAGAGGG	experimental		mature miRNA	standard	MIMAT0019031	hsa-miR-4496	hsa-miR-4496
1571	hsa-miR-4497	11253.6	509.89	5.99963e-108	13575.4	952.817	8.20574e-13	CUCCGGGACGGCUGGGC	experimental		mature miRNA	standard	MIMAT0019032	hsa-miR-4497	hsa-miR-4497
1572	hsa-miR-4498	2.1405	8.7756	0.969827	0.490299	11.5505	0.923601	UGGGCUGGCAGGGCAAGUGCUG	experimental		mature miRNA	standard	MIMAT0019033	hsa-miR-4498	hsa-miR-4498
1573	hsa-miR-4499	5.43582	8.33632	0.608828	3.03069	16.4245	0.737995	AAGACUGAGAGGAGGGA	experimental		mature miRNA	standard	MIMAT0019035	hsa-miR-4499	hsa-miR-4499
1574	hsa-miR-4500	31.0801	12.1936	0.0113878	9.16489	14.8903	0.497593	UGAGGUAGUAGUUUCUU	experimental		mature miRNA	standard	MIMAT0019036	hsa-miR-4500	hsa-miR-4500
1575	hsa-miR-4501	2.71752	5.97946	0.823871	3.93014	13.287	0.71499	UAUGUGACCUCGGAUGAAUCA	experimental		mature miRNA	standard	MIMAT0019037	hsa-miR-4501	hsa-miR-4501
1576	hsa-miR-4502	3.45521	6.97919	0.768353	3.67451	13.0746	0.705832	GCUGAUGAUGAUGGUGCUGAAG	experimental		mature miRNA	standard	MIMAT0019038	hsa-miR-4502	hsa-miR-4502
1577	hsa-miR-4503	2.99927	6.64401	0.799394	4.65539	13.3014	0.689183	UUUAAGCAGGAAAUAGAAUUUA	experimental		mature miRNA	standard	MIMAT0019039	hsa-miR-4503	hsa-miR-4503
1578	hsa-miR-4504	3.18952	7.10309	0.742466	7.72079	13.1273	0.531948	UGUGACAAUAGAGAUGAACAUG	experimental		mature miRNA	standard	MIMAT0019040	hsa-miR-4504	hsa-miR-4504
1579	hsa-miR-4505	45.556	13.2315	0.00029718	38.3122	16.66	0.0271143	AGGCUGGGCUGGGACGGA	experimental		mature miRNA	standard	MIMAT0019041	hsa-miR-4505	hsa-miR-4505
1580	hsa-miR-4506	2.40954	6.45347	0.883358	1.66916	13.3096	0.89643	AAAUGGGUGGUCUGAGGCAA	experimental		mature miRNA	standard	MIMAT0019042	hsa-miR-4506	hsa-miR-4506
1581	hsa-miR-4507	12.2757	8.76828	0.173604	15.2171	15.0314	0.354605	CUGGGUUGGGCUGGGCUGGG	experimental		mature miRNA	standard	MIMAT0019044	hsa-miR-4507	hsa-miR-4507
1582	hsa-miR-4508	1273.39	86.6595	5.42954e-50	1670.4	173.699	5.85907e-08	GCGGGGCUGGGCGCGCG	experimental		mature miRNA	standard	MIMAT0019045	hsa-miR-4508	hsa-miR-4508
1583	hsa-miR-4509	0.324198	6.60527	1	1.65995	13.3047	0.773484	ACUAAAGGAUAUAGAAGGUUUU	experimental		mature miRNA	standard	MIMAT0019046	hsa-miR-4509	hsa-miR-4509
1584	hsa-miR-4510	20.5911	11.6705	0.0926947	4.07264	14.9616	0.73129	UGAGGGAGUAGGAUGUAUGGUU	experimental		mature miRNA	standard	MIMAT0019047	hsa-miR-4510	hsa-miR-4510
1585	hsa-miR-4511	0.0213308	6.86163	1	2.74803	15.8038	0.68194	GAAGAACUGUUGCAUUUGCCCU	experimental		mature miRNA	standard	MIMAT0019048	hsa-miR-4511	hsa-miR-4511
1586	hsa-miR-4512	1.23402	7.52963	1	0.826978	15.7265	0.823578	CAGGGCCUCACUGUAUCGCCCA	experimental		mature miRNA	standard	MIMAT0019049	hsa-miR-4512	hsa-miR-4512
1587	hsa-miR-4513	2.36501	7.4549	0.783469	6.12496	17.1717	0.677374	AGACUGACGGCUGGAGGCCCAU	experimental		mature miRNA	standard	MIMAT0019050	hsa-miR-4513	hsa-miR-4513
1588	hsa-miR-4514	0.225808	6.82506	1	1.47726	14.1447	0.760437	ACAGGCAGGAUUGGGGAA	experimental		mature miRNA	standard	MIMAT0019051	hsa-miR-4514	hsa-miR-4514
1589	hsa-miR-4515	0.0232675	9.19353	1	1.2577	14.8686	0.813103	AGGACUGGACUCCCGGCAGCCC	experimental		mature miRNA	standard	MIMAT0019052	hsa-miR-4515	hsa-miR-4515
1590	hsa-miR-4516	3271.13	180.033	2.04736e-75	3599.17	231.866	6.4606e-45	GGGAGAAGGGUCGGGGC	experimental		mature miRNA	standard	MIMAT0019053	hsa-miR-4516	hsa-miR-4516
1591	hsa-miR-4517	1.75386	7.59793	0.911133	6.10385	13.0303	0.51238	AAAUAUGAUGAAACUCACAGCUGAG	experimental		mature miRNA	standard	MIMAT0019054	hsa-miR-4517	hsa-miR-4517
1592	hsa-miR-4518	1.91364	7.35306	0.849969	10.5152	16.9808	0.421484	GCUCAGGGAUGAUAACUGUGCUGAGA	experimental		mature miRNA	standard	MIMAT0019055	hsa-miR-4518	hsa-miR-4518
1593	hsa-miR-4519	3.52368	8.2584	0.851158	6.6804	13.7078	0.579095	CAGCAGUGCGCAGGGCUG	experimental		mature miRNA	standard	MIMAT0019056	hsa-miR-4519	hsa-miR-4519
1594	hsa-miR-4520a-3p	5.77817	12.9635	0.748484	13.2359	23.3335	0.506952	UUGGACAGAAAACACGCAGGAA	experimental		mature miRNA	standard	MIMAT0019057	hsa-miR-4520a-3p	hsa-miR-4520a-3p
1595	hsa-miR-4520a-5p	13.1665	33.8306	0.759148	8.2528	21.5894	0.61555	CCUGCGUGUUUUCUGUCCAA	experimental		mature miRNA	standard	MIMAT0019235,MIMAT0020299	hsa-miR-4520a-5p	hsa-miR-4520a-5p, hsa-miR-4520b-5p
1596	hsa-miR-4520b-3p	2.54191	7.18936	0.787416	7.73636	13.4944	0.518757	UUUGGACAGAAAACACGCAGGU	experimental		mature miRNA	standard	MIMAT0020300	hsa-miR-4520b-3p	hsa-miR-4520b-3p
1597	hsa-miR-4521	127.915	28.9257	2.44171e-06	151.527	53.294	0.0409568	GCUAAGGAAGUCCUGUGCUCAG	experimental		mature miRNA	standard	MIMAT0019058	hsa-miR-4521	hsa-miR-4521
1598	hsa-miR-4522	1.93418	6.47238	0.85208	6.41428	14.0957	0.590489	UGACUCUGCCUGUAGGCCGGU	experimental		mature miRNA	standard	MIMAT0019060	hsa-miR-4522	hsa-miR-4522
1599	hsa-miR-4523	0.0205962	6.95841	1	9.19211	29.6575	0.652239	GACCGAGAGGGCCUCGGCUGU	experimental		mature miRNA	standard	MIMAT0019061	hsa-miR-4523	hsa-miR-4523
1600	hsa-miR-4524a-3p	0.0200858	6.43201	1	6.46624	14.1945	0.361604	UGAGACAGGCUUAUGCUGCUAU	experimental		mature miRNA	standard	MIMAT0019063	hsa-miR-4524a-3p	hsa-miR-4524a-3p
1601	hsa-miR-4524a-5p	1.1696	7.18522	0.989711	7.88448	16.0155	0.500372	AUAGCAGCAUGAACCUGUCUCA	experimental		mature miRNA	standard	MIMAT0019062	hsa-miR-4524a-5p	hsa-miR-4524a-5p
1602	hsa-miR-4524b-3p	0.0200647	6.14896	1	4.92557	15.4289	0.69029	GAGACAGGUUCAUGCUGCUA	experimental		mature miRNA	standard	MIMAT0022256	hsa-miR-4524b-3p	hsa-miR-4524b-3p
1603	hsa-miR-4524b-5p	0.0225754	6.26074	1	1.40256	14.0917	1	AUAGCAGCAUAAGCCUGUCUC	experimental		mature miRNA	standard	MIMAT0022255	hsa-miR-4524b-5p	hsa-miR-4524b-5p
1604	hsa-miR-4525	0.0380718	7.55021	1	0.590809	14.6967	1	GGGGGGAUGUGCAUGCUGGUU	experimental		mature miRNA	standard	MIMAT0019064	hsa-miR-4525	hsa-miR-4525
1605	hsa-miR-4526	0.0380718	7.87444	1	0.128611	13.9567	1	GCUGACAGCAGGGCUGGCCGCU	experimental		mature miRNA	standard	MIMAT0019065	hsa-miR-4526	hsa-miR-4526
1606	hsa-miR-4527	2.38762	8.7511	0.945264	0.833829	13.8139	0.958754	UGGUCUGCAAAGAGAUGACUGU	experimental		mature miRNA	standard	MIMAT0019066	hsa-miR-4527	hsa-miR-4527
1607	hsa-miR-4528	0.0212739	8.0452	1	3.66378	21.3854	0.73561	UCAUUAUAUGUAUGAUCUGGAC	experimental		mature miRNA	standard	MIMAT0019067	hsa-miR-4528	hsa-miR-4528
1608	hsa-miR-4529-3p	1.11232	6.67598	1	0.00262661	13.1447	1	AUUGGACUGCUGAUGGCCCGU	experimental		mature miRNA	standard	MIMAT0019068	hsa-miR-4529-3p	hsa-miR-4529-3p
1609	hsa-miR-4529-5p	0.0380718	6.11343	1	0.00262661	14.238	1	AGGCCAUCAGCAGUCCAAUGAA	experimental		mature miRNA	standard	MIMAT0019236	hsa-miR-4529-5p	hsa-miR-4529-5p
1610	hsa-miR-4530	217.595	27.9752	5.2029e-17	230.427	55.8109	1.12491e-05	CCCAGCAGGACGGGAGCG	experimental		mature miRNA	standard	MIMAT0019069	hsa-miR-4530	hsa-miR-4530
1611	hsa-miR-4531	0.271564	6.73543	1	0.00262661	12.935	1	AUGGAGAAGGCUUCUGA	experimental		mature miRNA	standard	MIMAT0019070	hsa-miR-4531	hsa-miR-4531
1612	hsa-miR-4532	796.042	61.911	6.75167e-37	813.433	101.038	1.07927e-10	CCCCGGGGAGCCCGGCG	experimental		mature miRNA	standard	MIMAT0019071	hsa-miR-4532	hsa-miR-4532
1613	hsa-miR-4533	0.969547	7.58535	1	0.18452	13.7803	1	UGGAAGGAGGUUGCCGGACGCU	experimental		mature miRNA	standard	MIMAT0019072	hsa-miR-4533	hsa-miR-4533
1614	hsa-miR-4534	16.6947	10.2994	0.11735	10.2599	15.6567	0.503696	GGAUGGAGGAGGGGUCU	experimental		mature miRNA	standard	MIMAT0019073	hsa-miR-4534	hsa-miR-4534
1615	hsa-miR-4535	12.8736	8.94487	0.20786	5.06831	14.3348	0.658915	GUGGACCUGGCUGGGAC	experimental		mature miRNA	standard	MIMAT0019075	hsa-miR-4535	hsa-miR-4535
1616	hsa-miR-4536-3p	2.59109	7.92123	0.899948	3.97932	15.6422	0.588037	UCGUGCAUAUAUCUACCACAU	experimental		mature miRNA	standard	MIMAT0020959	hsa-miR-4536-3p	hsa-miR-4536-3p
1617	hsa-miR-4536-5p	5.03727	7.77741	0.752284	0.583546	12.633	1	UGUGGUAGAUAUAUGCACGAU	experimental		mature miRNA	standard	MIMAT0019078	hsa-miR-4536-5p	hsa-miR-4536-5p
1618	hsa-miR-4537	5.53817	11.362	0.976126	0.00262661	14.354	1	UGAGCCGAGCUGAGCUUAGCUG	experimental		mature miRNA	standard	MIMAT0019080	hsa-miR-4537	hsa-miR-4537
1619	hsa-miR-4538	6.79768	6.65705	0.618693	0.154083	13.5982	0.939642	GAGCUUGGAUGAGCUGGGCUGA	experimental		mature miRNA	standard	MIMAT0019081	hsa-miR-4538	hsa-miR-4538
1620	hsa-miR-4539	3.55878	6.39478	0.651834	2.31659	13.2376	0.815772	GCUGAACUGGGCUGAGCUGGGC	experimental		mature miRNA	standard	MIMAT0019082	hsa-miR-4539	hsa-miR-4539
1621	hsa-miR-4540	2.98451	8.31261	1	1.38904	12.1721	0.845172	UUAGUCCUGCCUGUAGGUUUA	experimental		mature miRNA	standard	MIMAT0019083	hsa-miR-4540	hsa-miR-4540
1622	hsa-miR-4632-3p	6.82979	7.82493	0.486588	0.298985	13.4027	0.960162	UGCCGCCCUCUCGCUGCUCUAG	experimental		mature miRNA	standard	MIMAT0019688	hsa-miR-4632-3p	hsa-miR-4632-3p
1623	hsa-miR-4632-5p	99.8047	22.1596	9.76518e-06	95.0623	24.2511	6.80395e-05	GAGGGCAGCGUGGGUGUGGCGGA	experimental		mature miRNA	standard	MIMAT0022977	hsa-miR-4632-5p	hsa-miR-4632-5p
1624	hsa-miR-4633-3p	4.02437	6.77187	0.741484	0.407498	14.624	1	AGGAGCUAGCCAGGCAUAUGCA	experimental		mature miRNA	standard	MIMAT0019690	hsa-miR-4633-3p	hsa-miR-4633-3p
1625	hsa-miR-4633-5p	1.79288	7.01267	0.907892	0.0337032	15.8644	1	AUAUGCCUGGCUAGCUCCUC	experimental		mature miRNA	standard	MIMAT0019689	hsa-miR-4633-5p	hsa-miR-4633-5p
1626	hsa-miR-4634	15.4318	9.81851	0.153409	6.63784	16.7746	0.63681	CGGCGCGACCGGCCCGGGG	experimental		mature miRNA	standard	MIMAT0019691	hsa-miR-4634	hsa-miR-4634
1627	hsa-miR-4635	5.44299	11.2231	0.981155	0.00262661	14.3804	1	UCUUGAAGUCAGAACCCGCAA	experimental		mature miRNA	standard	MIMAT0019692	hsa-miR-4635	hsa-miR-4635
1628	hsa-miR-4636	1.84203	7.928	0.990501	0.00262661	12.5587	1	AACUCGUGUUCAAAGCCUUUAG	experimental		mature miRNA	standard	MIMAT0019693	hsa-miR-4636	hsa-miR-4636
1629	hsa-miR-4637	0.0380718	7.53852	1	0.00262661	15.3875	1	UACUAACUGCAGAUUCAAGUGA	experimental		mature miRNA	standard	MIMAT0019694	hsa-miR-4637	hsa-miR-4637
1630	hsa-miR-4638-3p	5.51774	12.001	0.94005	0.00262661	12.8437	1	CCUGGACACCGCUCAGCCGGCCG	experimental		mature miRNA	standard	MIMAT0019696	hsa-miR-4638-3p	hsa-miR-4638-3p
1631	hsa-miR-4638-5p	860.179	125.831	6.56946e-11	304.654	99.1203	0.0013195	ACUCGGCUGCGGUGGACAAGU	experimental		mature miRNA	standard	MIMAT0019695	hsa-miR-4638-5p	hsa-miR-4638-5p
1632	hsa-miR-4639-3p	0.0380718	7.24036	1	0.236612	12.7837	1	UCACUCUCACCUUGCUUUGC	experimental		mature miRNA	standard	MIMAT0019698	hsa-miR-4639-3p	hsa-miR-4639-3p
1633	hsa-miR-4639-5p	0.0380718	8.03874	1	0.542396	16.8295	1	UUGCUAAGUAGGCUGAGAUUGA	experimental		mature miRNA	standard	MIMAT0019697	hsa-miR-4639-5p	hsa-miR-4639-5p
1634	hsa-miR-4640-3p	2.85843	6.88308	0.721815	3.69603	13.8748	0.680777	CACCCCCUGUUUCCUGGCCCAC	experimental		mature miRNA	standard	MIMAT0019700	hsa-miR-4640-3p	hsa-miR-4640-3p
1635	hsa-miR-4640-5p	0.0301175	6.62688	1	0.313318	13.4706	0.937446	UGGGCCAGGGAGCAGCUGGUGGG	experimental		mature miRNA	standard	MIMAT0019699	hsa-miR-4640-5p	hsa-miR-4640-5p
1636	hsa-miR-4641	0.188127	6.18138	0.968979	0.00262661	13.1065	1	UGCCCAUGCCAUACUUUUGCCUCA	experimental		mature miRNA	standard	MIMAT0019701	hsa-miR-4641	hsa-miR-4641
1637	hsa-miR-4642	2.55265	10.2019	0.94562	0.00291512	14.5098	1	AUGGCAUCGUCCCCUGGUGGCU	experimental		mature miRNA	standard	MIMAT0019702	hsa-miR-4642	hsa-miR-4642
1638	hsa-miR-4643	0.0380718	7.11473	1	0.00262661	14.787	1	GACACAUGACCAUAAAUGCUAA	experimental		mature miRNA	standard	MIMAT0019703	hsa-miR-4643	hsa-miR-4643
1639	hsa-miR-4644	3.40955	8.98837	0.814361	1.50635	13.7326	0.836777	UGGAGAGAGAAAAGAGACAGAAG	experimental		mature miRNA	standard	MIMAT0019704	hsa-miR-4644	hsa-miR-4644
1640	hsa-miR-4645-3p	1.96713	6.83995	0.855647	3.88885	33.5494	0.868876	AGACAGUAGUUCUUGCCUGGUU	experimental		mature miRNA	standard	MIMAT0019706	hsa-miR-4645-3p	hsa-miR-4645-3p
1641	hsa-miR-4645-5p	1.39373	7.30162	1	0.00262661	12.267	1	ACCAGGCAAGAAAUAUUGU	experimental		mature miRNA	standard	MIMAT0019705	hsa-miR-4645-5p	hsa-miR-4645-5p
1642	hsa-miR-4646-3p	9.00938	8.37243	0.324559	3.96697	12.045	0.628491	AUUGUCCCUCUCCCUUCCCAG	experimental		mature miRNA	standard	MIMAT0019708	hsa-miR-4646-3p	hsa-miR-4646-3p
1643	hsa-miR-4646-5p	4.68907	6.77385	0.593824	0.885923	13.3272	0.85482	ACUGGGAAGAGGAGCUGAGGGA	experimental		mature miRNA	standard	MIMAT0019707	hsa-miR-4646-5p	hsa-miR-4646-5p
1644	hsa-miR-4647	3.95087	6.68973	0.616155	2.4213	13.9956	0.816005	GAAGAUGGUGCUGUGCUGAGGAA	experimental		mature miRNA	standard	MIMAT0019709	hsa-miR-4647	hsa-miR-4647
1645	hsa-miR-4648	2.30048	6.16984	0.774093	1.38748	13.6005	0.844019	UGUGGGACUGCAAAUGGGAG	experimental		mature miRNA	standard	MIMAT0019710	hsa-miR-4648	hsa-miR-4648
1646	hsa-miR-4649-3p	0.25158	6.13432	1	0.00262661	12.2776	1	UCUGAGGCCUGCCUCUCCCCA	experimental		mature miRNA	standard	MIMAT0019712	hsa-miR-4649-3p	hsa-miR-4649-3p
1647	hsa-miR-4649-5p	32.9481	13.2546	0.00794814	22.3462	15.0783	0.233334	UGGGCGAGGGGUGGGCUCUCAGAG	experimental		mature miRNA	standard	MIMAT0019711	hsa-miR-4649-5p	hsa-miR-4649-5p
1648	hsa-miR-4650-3p	1.06061	6.13888	0.966942	0.00262661	12.0864	1	AGGUAGAAUGAGGCCUGACAU	experimental		mature miRNA	standard	MIMAT0019714	hsa-miR-4650-3p	hsa-miR-4650-3p
1649	hsa-miR-4650-5p	2.22361	6.167	0.830279	0.0456645	13.1339	1	UCAGGCCUCUUUCUACCUU	experimental		mature miRNA	standard	MIMAT0019713	hsa-miR-4650-5p	hsa-miR-4650-5p
1650	hsa-miR-4651	6.89841	7.76562	0.415761	8.76056	35.4316	0.770751	CGGGGUGGGUGAGGUCGGGC	experimental		mature miRNA	standard	MIMAT0019715	hsa-miR-4651	hsa-miR-4651
1651	hsa-miR-4652-3p	5.86014	7.3247	0.492529	1.17635	13.4546	0.886982	GUUCUGUUAACCCAUCCCCUCA	experimental		mature miRNA	standard	MIMAT0019717	hsa-miR-4652-3p	hsa-miR-4652-3p
1652	hsa-miR-4652-5p	4.52407	8.35098	0.799144	0.00405212	11.8478	1	AGGGGACUGGUUAAUAGAACUA	experimental		mature miRNA	standard	MIMAT0019716	hsa-miR-4652-5p	hsa-miR-4652-5p
1653	hsa-miR-4653-3p	0.20399	6.34605	1	0.00262661	12.8505	1	UGGAGUUAAGGGUUGCUUGGAGA	experimental		mature miRNA	standard	MIMAT0019719	hsa-miR-4653-3p	hsa-miR-4653-3p
1654	hsa-miR-4653-5p	0.579469	6.65962	1	0.00262661	13.8716	1	UCUCUGAGCAAGGCUUAACACC	experimental		mature miRNA	standard	MIMAT0019718	hsa-miR-4653-5p	hsa-miR-4653-5p
1655	hsa-miR-4654	2.56637	7.03611	0.930681	0.00389464	14.3292	1	UGUGGGAUCUGGAGGCAUCUGG	experimental		mature miRNA	standard	MIMAT0019720	hsa-miR-4654	hsa-miR-4654
1656	hsa-miR-4655-3p	7.50364	8.88737	0.637563	0.167592	13.9936	1	ACCCUCGUCAGGUCCCCGGGG	experimental		mature miRNA	standard	MIMAT0019722	hsa-miR-4655-3p	hsa-miR-4655-3p
1657	hsa-miR-4655-5p	11.8204	10.4545	0.36635	1.1772	14.2604	0.853019	CACCGGGGAUGGCAGAGGGUCG	experimental		mature miRNA	standard	MIMAT0019721	hsa-miR-4655-5p	hsa-miR-4655-5p
1658	hsa-miR-4656	3.33726	9.7981	0.984049	0.90145	16.0206	0.993237	UGGGCUGAGGGCAGGAGGCCUGU	experimental		mature miRNA	standard	MIMAT0019723	hsa-miR-4656	hsa-miR-4656
1659	hsa-miR-4657	3.25786	8.46298	0.875683	0.00406247	12.0482	1	AAUGUGGAAGUGGUCUGAGGCAU	experimental		mature miRNA	standard	MIMAT0019724	hsa-miR-4657	hsa-miR-4657
1660	hsa-miR-4658	0.0380718	6.17156	1	0.00262661	14.1785	1	GUGAGUGUGGAUCCUGGAGGAAU	experimental		mature miRNA	standard	MIMAT0019725	hsa-miR-4658	hsa-miR-4658
1661	hsa-miR-4659a-3p	1.57436	7.04562	1	0.00262661	13.3423	1	UUUCUUCUUAGACAUGGCAACG	experimental		mature miRNA	standard	MIMAT0019727	hsa-miR-4659a-3p	hsa-miR-4659a-3p
1662	hsa-miR-4659a-5p	0.0380718	5.58301	1	0.00262661	15.9175	1	CUGCCAUGUCUAAGAAGAAAAC	experimental		mature miRNA	standard	MIMAT0019726	hsa-miR-4659a-5p	hsa-miR-4659a-5p
1663	hsa-miR-4659b-3p	0.0380718	6.7618	1	0.00262661	15.8178	1	UUUCUUCUUAGACAUGGCAGCU	experimental		mature miRNA	standard	MIMAT0019734	hsa-miR-4659b-3p	hsa-miR-4659b-3p
1664	hsa-miR-4659b-5p	0.444839	7.10075	1	0.00262661	15.8529	1	UUGCCAUGUCUAAGAAGAA	experimental		mature miRNA	standard	MIMAT0019733	hsa-miR-4659b-5p	hsa-miR-4659b-5p
1665	hsa-miR-4660	1.53822	7.49153	1	0.00393141	14.1567	1	UGCAGCUCUGGUGGAAAAUGGAG	experimental		mature miRNA	standard	MIMAT0019728	hsa-miR-4660	hsa-miR-4660
1666	hsa-miR-4661-3p	1.74356	7.09059	0.992717	0.00262661	11.427	1	CAGGAUCCACAGAGCUAGUCCA	experimental		mature miRNA	standard	MIMAT0019730	hsa-miR-4661-3p	hsa-miR-4661-3p
1667	hsa-miR-4661-5p	0.0380718	6.90517	1	0.00262661	11.9881	1	AACUAGCUCUGUGGAUCCUGAC	experimental		mature miRNA	standard	MIMAT0019729	hsa-miR-4661-5p	hsa-miR-4661-5p
1668	hsa-miR-4662a-3p	3.70977	8.82261	0.931638	0.00262661	13.1265	1	AAAGAUAGACAAUUGGCUAAAU	experimental		mature miRNA	standard	MIMAT0019732	hsa-miR-4662a-3p	hsa-miR-4662a-3p
1669	hsa-miR-4662a-5p	4.10635	9.15914	1	0.00262661	12.106	1	UUAGCCAAUUGUCCAUCUUUAG	experimental		mature miRNA	standard	MIMAT0019731	hsa-miR-4662a-5p	hsa-miR-4662a-5p
1670	hsa-miR-4662b	2.82329	7.49933	0.863231	0.00415558	13.443	1	AAAGAUGGACAAUUGGCUAAAU	experimental		mature miRNA	standard	MIMAT0019736	hsa-miR-4662b	hsa-miR-4662b
1671	hsa-miR-4663	2.77162	6.94614	0.824859	0.00387603	13.6585	1	AGCUGAGCUCCAUGGACGUGCAGU	experimental		mature miRNA	standard	MIMAT0019735	hsa-miR-4663	hsa-miR-4663
1672	hsa-miR-4664-3p	4.9328	6.83482	0.706811	0.522039	12.7789	0.92032	CUUCCGGUCUGUGAGCCCCGUC	experimental		mature miRNA	standard	MIMAT0019738	hsa-miR-4664-3p	hsa-miR-4664-3p
1673	hsa-miR-4664-5p	28.6129	20.317	0.140874	24.1052	16.7625	0.0730837	UGGGGUGCCCACUCCGCAAGUU	experimental		mature miRNA	standard	MIMAT0019737	hsa-miR-4664-5p	hsa-miR-4664-5p
1674	hsa-miR-4665-3p	3.3849	9.4993	0.841107	0.00357633	12.684	1	CUCGGCCGCGGCGCGUAGCCCCCGCC	experimental		mature miRNA	standard	MIMAT0019740	hsa-miR-4665-3p	hsa-miR-4665-3p
1675	hsa-miR-4665-5p	1.92777	7.59999	1	0.682198	13.3	0.795586	CUGGGGGACGCGUGAGCGCGAGC	experimental		mature miRNA	standard	MIMAT0019739	hsa-miR-4665-5p	hsa-miR-4665-5p
1676	hsa-miR-4666a-3p	2.14981	6.71481	0.84946	0.00388892	15.7899	1	CAUACAAUCUGACAUGUAUUU	experimental		mature miRNA	standard	MIMAT0019742	hsa-miR-4666a-3p	hsa-miR-4666a-3p
1677	hsa-miR-4666a-5p	3.10425	6.61402	0.806659	0.00420434	12.9925	1	AUACAUGUCAGAUUGUAUGCC	experimental		mature miRNA	standard	MIMAT0019741	hsa-miR-4666a-5p	hsa-miR-4666a-5p
1678	hsa-miR-4666b	5.08718	7.23601	0.687968	3.85749	34.2441	0.829115	UUGCAUGUCAGAUUGUAAUUCCC	experimental		mature miRNA	standard	MIMAT0022485	hsa-miR-4666b	hsa-miR-4666b
1679	hsa-miR-4667-3p	3.36215	7.93155	0.73809	1.42308	14.3644	0.779722	UCCCUCCUUCUGUCCCCACAG	experimental		mature miRNA	standard	MIMAT0019744	hsa-miR-4667-3p	hsa-miR-4667-3p
1680	hsa-miR-4667-5p	13.5471	10.2754	0.261621	9.16501	37.1526	0.761861	ACUGGGGAGCAGAAGGAGAACC	experimental		mature miRNA	standard	MIMAT0019743	hsa-miR-4667-5p	hsa-miR-4667-5p
1681	hsa-miR-4668-3p	6.73003	12.602	0.778725	0.00262661	12.8374	1	GAAAAUCCUUUUUGUUUUUCCAG	experimental		mature miRNA	standard	MIMAT0019746	hsa-miR-4668-3p	hsa-miR-4668-3p
1682	hsa-miR-4668-5p	25.5352	11.8515	0.0440505	5.05418	12.1031	0.764523	AGGGAAAAAAAAAAGGAUUUGUC	experimental		mature miRNA	standard	MIMAT0019745	hsa-miR-4668-5p	hsa-miR-4668-5p
1683	hsa-miR-4669	2.50418	6.64983	0.818169	0.00391826	12.0291	1	UGUGUCCGGGAAGUGGAGGAGG	experimental		mature miRNA	standard	MIMAT0019749	hsa-miR-4669	hsa-miR-4669
1684	hsa-miR-4670-3p	4.61861	8.19252	0.7992	0.00434975	13.756	1	UGAAGUUACAUCAUGGUCGCUU	experimental		mature miRNA	standard	MIMAT0019751	hsa-miR-4670-3p	hsa-miR-4670-3p
1685	hsa-miR-4670-5p	0.0305856	5.23318	1	0.0200258	12.6278	1	AAGCGACCAUGAUGUAACUUCA	experimental		mature miRNA	standard	MIMAT0019750	hsa-miR-4670-5p	hsa-miR-4670-5p
1686	hsa-miR-4671-3p	2.20984	7.92032	1	0.0038713	11.2511	1	UUAGUGCAUAGUCUUUGGUCU	experimental		mature miRNA	standard	MIMAT0019753	hsa-miR-4671-3p	hsa-miR-4671-3p
1687	hsa-miR-4671-5p	0.98129	6.9141	1	0.00262661	11.3885	1	ACCGAAGACUGUGCGCUAAUCU	experimental		mature miRNA	standard	MIMAT0019752	hsa-miR-4671-5p	hsa-miR-4671-5p
1688	hsa-miR-4672	1.3959	6.97087	0.931623	1.75697	23.7025	0.880859	UUACACAGCUGGACAGAGGCA	experimental		mature miRNA	standard	MIMAT0019754	hsa-miR-4672	hsa-miR-4672
1689	hsa-miR-4673	0.524329	6.48923	1	0.00262661	14.0181	1	UCCAGGCAGGAGCCGGACUGGA	experimental		mature miRNA	standard	MIMAT0019755	hsa-miR-4673	hsa-miR-4673
1690	hsa-miR-4674	14.3078	11.8855	0.306325	3.18958	18.2009	0.796713	CUGGGCUCGGGACGCGCGGCU	experimental		mature miRNA	standard	MIMAT0019756	hsa-miR-4674	hsa-miR-4674
1691	hsa-miR-4675	0.0380718	5.91423	1	0.00262661	16.8146	1	GGGGCUGUGAUUGACCAGCAGG	experimental		mature miRNA	standard	MIMAT0019757	hsa-miR-4675	hsa-miR-4675
1692	hsa-miR-4676-3p	2.91381	9.05077	1	0.00262661	14.1571	1	CACUGUUUCACCACUGGCUCUU	experimental		mature miRNA	standard	MIMAT0019759	hsa-miR-4676-3p	hsa-miR-4676-3p
1693	hsa-miR-4676-5p	0.0380718	7.91251	1	0.00262661	13.8001	1	GAGCCAGUGGUGAGACAGUGA	experimental		mature miRNA	standard	MIMAT0019758	hsa-miR-4676-5p	hsa-miR-4676-5p
1694	hsa-miR-4677-3p	3.43715	8.08982	0.874748	0.598248	13.6688	1	UCUGUGAGACCAAAGAACUACU	experimental		mature miRNA	standard	MIMAT0019761	hsa-miR-4677-3p	hsa-miR-4677-3p
1695	hsa-miR-4677-5p	5.91165	8.83045	0.758906	0.0711583	13.1983	1	UUGUUCUUUGGUCUUUCAGCCA	experimental		mature miRNA	standard	MIMAT0019760	hsa-miR-4677-5p	hsa-miR-4677-5p
1696	hsa-miR-4678	4.4917	8.99957	0.844083	0.00424715	14.8976	1	AAGGUAUUGUUCAGACUUAUGA	experimental		mature miRNA	standard	MIMAT0019762	hsa-miR-4678	hsa-miR-4678
1697	hsa-miR-4679	0.362623	6.62242	1	0.00262661	13.9296	1	UCUGUGAUAGAGAUUCUUUGCU	experimental		mature miRNA	standard	MIMAT0019763	hsa-miR-4679	hsa-miR-4679
1698	hsa-miR-4680-3p	1.50932	6.57881	0.907814	0.00375234	12.1943	1	UCUGAAUUGUAAGAGUUGUUA	experimental		mature miRNA	standard	MIMAT0019765	hsa-miR-4680-3p	hsa-miR-4680-3p
1699	hsa-miR-4680-5p	2.40711	7.26559	0.927642	0.651797	15.0066	0.996615	AGAACUCUUGCAGUCUUAGAUGU	experimental		mature miRNA	standard	MIMAT0019764	hsa-miR-4680-5p	hsa-miR-4680-5p
1700	hsa-miR-4681	6.23805	12.2416	0.91891	0.0650275	14.7327	1	AACGGGAAUGCAGGCUGUAUCU	experimental		mature miRNA	standard	MIMAT0019766	hsa-miR-4681	hsa-miR-4681
1701	hsa-miR-4682	5.32008	9.86994	0.841767	0.0567632	12.0313	1	UCUGAGUUCCUGGAGCCUGGUCU	experimental		mature miRNA	standard	MIMAT0019767	hsa-miR-4682	hsa-miR-4682
1702	hsa-miR-4683	4.954	6.62086	0.555916	1.5619	13.0183	0.886073	UGGAGAUCCAGUGCUCGCCCGAU	experimental		mature miRNA	standard	MIMAT0019768	hsa-miR-4683	hsa-miR-4683
1703	hsa-miR-4684-3p	5.83341	7.85465	0.484034	4.74758	16.201	0.72326	UGUUGCAAGUCGGUGGAGACGU	experimental		mature miRNA	standard	MIMAT0019770	hsa-miR-4684-3p	hsa-miR-4684-3p
1704	hsa-miR-4684-5p	1.67624	5.70609	0.880904	0.312947	12.1506	0.991754	CUCUCUACUGACUUGCAACAUA	experimental		mature miRNA	standard	MIMAT0019769	hsa-miR-4684-5p	hsa-miR-4684-5p
1705	hsa-miR-4685-3p	6.06713	7.2228	0.444267	4.07367	14.2936	0.752487	UCUCCCUUCCUGCCCUGGCUAG	experimental		mature miRNA	standard	MIMAT0019772	hsa-miR-4685-3p	hsa-miR-4685-3p
1706	hsa-miR-4685-5p	5.93474	6.8609	0.445838	5.65549	13.9779	0.646344	CCCAGGGCUUGGAGUGGGGCAAGGUU	experimental		mature miRNA	standard	MIMAT0019771	hsa-miR-4685-5p	hsa-miR-4685-5p
1707	hsa-miR-4686	6.20234	8.42329	0.569929	1.4161	12.3481	0.958498	UAUCUGCUGGGCUUUCUGGUGUU	experimental		mature miRNA	standard	MIMAT0019773	hsa-miR-4686	hsa-miR-4686
1708	hsa-miR-4687-3p	277.99	32.7095	2.43808e-17	231.876	70.6005	0.00223705	UGGCUGUUGGAGGGGGCAGGC	experimental		mature miRNA	standard	MIMAT0019775	hsa-miR-4687-3p	hsa-miR-4687-3p
1709	hsa-miR-4687-5p	11.4659	8.58918	0.187351	7.78354	11.8834	0.448803	CAGCCCUCCUCCCGCACCCAAA	experimental		mature miRNA	standard	MIMAT0019774	hsa-miR-4687-5p	hsa-miR-4687-5p
1710	hsa-miR-4688	6.84384	6.26758	0.317323	5.67395	13.6787	0.588673	UAGGGGCAGCAGAGGACCUGGG	experimental		mature miRNA	standard	MIMAT0019777	hsa-miR-4688	hsa-miR-4688
1711	hsa-miR-4689	2.36836	6.51504	0.753723	2.31066	12.995	0.765928	UUGAGGAGACAUGGUGGGGGCC	experimental		mature miRNA	standard	MIMAT0019778	hsa-miR-4689	hsa-miR-4689
1712	hsa-miR-4690-3p	3.75844	7.04496	0.631233	1.41845	12.6731	0.974536	GCAGCCCAGCUGAGGCCUCUG	experimental		mature miRNA	standard	MIMAT0019780	hsa-miR-4690-3p	hsa-miR-4690-3p
1713	hsa-miR-4690-5p	94.3345	16.3673	1.0802e-10	65.5524	19.367	0.00975161	GAGCAGGCGAGGCUGGGCUGAA	experimental		mature miRNA	standard	MIMAT0019779	hsa-miR-4690-5p	hsa-miR-4690-5p
1714	hsa-miR-4691-3p	1.27214	6.38384	0.849437	0.805404	12.0077	0.912984	CCAGCCACGGACUGAGAGUGCAU	experimental		mature miRNA	standard	MIMAT0019782	hsa-miR-4691-3p	hsa-miR-4691-3p
1715	hsa-miR-4691-5p	3.32528	7.50571	0.669449	6.34043	17.6895	0.627959	GUCCUCCAGGCCAUGAGCUGCGG	experimental		mature miRNA	standard	MIMAT0019781	hsa-miR-4691-5p	hsa-miR-4691-5p
1716	hsa-miR-4692	2.35824	7.06505	0.763938	2.46082	15.8568	0.808741	UCAGGCAGUGUGGGUAUCAGAU	experimental		mature miRNA	standard	MIMAT0019783	hsa-miR-4692	hsa-miR-4692
1717	hsa-miR-4693-3p	1.07961	7.4436	0.926869	0.21558	15.9946	1	UGAGAGUGGAAUUCACAGUAUUU	experimental		mature miRNA	standard	MIMAT0019785	hsa-miR-4693-3p	hsa-miR-4693-3p
1718	hsa-miR-4693-5p	0.380583	7.65916	0.9593	2.29985	12.3286	0.746065	AUACUGUGAAUUUCACUGUCACA	experimental		mature miRNA	standard	MIMAT0019784	hsa-miR-4693-5p	hsa-miR-4693-5p
1719	hsa-miR-4694-3p	0.146575	6.05153	0.949407	2.98924	16.2955	0.696304	CAAAUGGACAGGAUAACACCU	experimental		mature miRNA	standard	MIMAT0019787	hsa-miR-4694-3p	hsa-miR-4694-3p
1720	hsa-miR-4694-5p	0.483322	5.72288	0.967189	1.10815	13.817	0.896837	AGGUGUUAUCCUAUCCAUUUGC	experimental		mature miRNA	standard	MIMAT0019786	hsa-miR-4694-5p	hsa-miR-4694-5p
1721	hsa-miR-4695-3p	3.15667	8.4091	0.77286	2.14686	15.3526	0.857869	UGAUCUCACCGCUGCCUCCUUC	experimental		mature miRNA	standard	MIMAT0019789	hsa-miR-4695-3p	hsa-miR-4695-3p
1722	hsa-miR-4695-5p	9.48068	9.53679	0.341329	10.7807	34.2074	0.734127	CAGGAGGCAGUGGGCGAGCAGG	experimental		mature miRNA	standard	MIMAT0019788	hsa-miR-4695-5p	hsa-miR-4695-5p
1723	hsa-miR-4696	0.0380718	6.63753	1	0.140743	14.0715	0.985314	UGCAAGACGGAUACUGUCAUCU	experimental		mature miRNA	standard	MIMAT0019790	hsa-miR-4696	hsa-miR-4696
1724	hsa-miR-4697-3p	2.45893	7.51876	0.810448	5.52614	15.8306	0.683517	UGUCAGUGACUCCUGCCCCUUGGU	experimental		mature miRNA	standard	MIMAT0019792	hsa-miR-4697-3p	hsa-miR-4697-3p
1725	hsa-miR-4697-5p	3.50953	10.5072	0.82806	1.31176	15.4394	0.85107	AGGGGGCGCAGUCACUGACGUG	experimental		mature miRNA	standard	MIMAT0019791	hsa-miR-4697-5p	hsa-miR-4697-5p
1726	hsa-miR-4698	5.1516	7.3743	0.536924	13.2853	31.6667	0.602646	UCAAAAUGUAGAGGAAGACCCCA	experimental		mature miRNA	standard	MIMAT0019793	hsa-miR-4698	hsa-miR-4698
1727	hsa-miR-4699-3p	0.962112	6.40676	0.95905	7.81004	15.1886	0.505469	AAUUUACUCUGCAAUCUUCUCC	experimental		mature miRNA	standard	MIMAT0019795	hsa-miR-4699-3p	hsa-miR-4699-3p
1728	hsa-miR-4699-5p	1.26403	6.17587	0.867211	3.73921	12.3985	0.613671	AGAAGAUUGCAGAGUAAGUUCC	experimental		mature miRNA	standard	MIMAT0019794	hsa-miR-4699-5p	hsa-miR-4699-5p
1729	hsa-miR-4700-3p	4.6829	8.87408	0.652799	8.08303	15.9241	0.534038	CACAGGACUGACUCCUCACCCCAGUG	experimental		mature miRNA	standard	MIMAT0019797	hsa-miR-4700-3p	hsa-miR-4700-3p
1730	hsa-miR-4700-5p	1.28363	6.10231	0.939189	3.54041	13.6475	0.599583	UCUGGGGAUGAGGACAGUGUGU	experimental		mature miRNA	standard	MIMAT0019796	hsa-miR-4700-5p	hsa-miR-4700-5p
1731	hsa-miR-4701-3p	3.00114	7.34079	0.75968	5.98822	12.7039	0.569596	AUGGGUGAUGGGUGUGGUGU	experimental		mature miRNA	standard	MIMAT0019799	hsa-miR-4701-3p	hsa-miR-4701-3p
1732	hsa-miR-4701-5p	6.08074	8.60795	0.462664	11.9575	14.1438	0.329812	UUGGCCACCACACCUACCCCUU	experimental		mature miRNA	standard	MIMAT0019798	hsa-miR-4701-5p	hsa-miR-4701-5p
1733	hsa-miR-4703-3p	2.78803	7.22389	0.708037	7.63176	15.0716	0.481667	UGUAGUUGUAUUGUAUUGCCAC	experimental		mature miRNA	standard	MIMAT0019802	hsa-miR-4703-3p	hsa-miR-4703-3p
1734	hsa-miR-4703-5p	2.58996	6.43627	0.714481	6.04393	14.7104	0.531352	UAGCAAUACAGUACAAAUAUAGU	experimental		mature miRNA	standard	MIMAT0019801	hsa-miR-4703-5p	hsa-miR-4703-5p
1735	hsa-miR-4704-3p	1.82745	6.52756	0.77935	4.34679	13.1612	0.633175	UCAGUCACAUAUCUAGUGUCUA	experimental		mature miRNA	standard	MIMAT0019804	hsa-miR-4704-3p	hsa-miR-4704-3p
1736	hsa-miR-4704-5p	1.43384	6.0142	0.814996	4.98755	14.7524	0.592296	GACACUAGGCAUGUGAGUGAUU	experimental		mature miRNA	standard	MIMAT0019803	hsa-miR-4704-5p	hsa-miR-4704-5p
1737	hsa-miR-4705	0.878914	6.99007	0.928756	4.42716	14.6339	0.627307	UCAAUCACUUGGUAAUUGCUGU	experimental		mature miRNA	standard	MIMAT0019805	hsa-miR-4705	hsa-miR-4705
1738	hsa-miR-4706	0.975233	6.21496	0.91825	5.6043	14.7102	0.487274	AGCGGGGAGGAAGUGGGCGCUGCUU	experimental		mature miRNA	standard	MIMAT0019806	hsa-miR-4706	hsa-miR-4706
1739	hsa-miR-4707-3p	4.63171	7.97611	0.77055	8.44648	16.7799	0.535594	AGCCCGCCCCAGCCGAGGUUCU	experimental		mature miRNA	standard	MIMAT0019808	hsa-miR-4707-3p	hsa-miR-4707-3p
1740	hsa-miR-4707-5p	309.166	38.9775	7.54347e-14	341.544	45.7581	7.03306e-13	GCCCCGGCGCGGGCGGGUUCUGG	experimental		mature miRNA	standard	MIMAT0019807	hsa-miR-4707-5p	hsa-miR-4707-5p
1741	hsa-miR-4708-3p	5.52823	7.70729	0.724103	5.03177	16.8316	0.702224	AGCAAGGCGGCAUCUCUCUGAU	experimental		mature miRNA	standard	MIMAT0019810	hsa-miR-4708-3p	hsa-miR-4708-3p
1742	hsa-miR-4708-5p	2.95577	8.90359	1	2.60703	16.3962	0.870568	AGAGAUGCCGCCUUGCUCCUU	experimental		mature miRNA	standard	MIMAT0019809	hsa-miR-4708-5p	hsa-miR-4708-5p
1743	hsa-miR-4709-3p	2.77526	9.06422	0.939496	2.65303	15.217	0.857857	UUGAAGAGGAGGUGCUCUGUAGC	experimental		mature miRNA	standard	MIMAT0019812	hsa-miR-4709-3p	hsa-miR-4709-3p
1744	hsa-miR-4709-5p	1.80327	7.45472	0.969198	3.06731	13.1396	0.769018	ACAACAGUGACUUGCUCUCCAA	experimental		mature miRNA	standard	MIMAT0019811	hsa-miR-4709-5p	hsa-miR-4709-5p
1745	hsa-miR-4710	7.45883	6.78202	0.413293	11.4021	16.3193	0.489903	GGGUGAGGGCAGGUGGUU	experimental		mature miRNA	standard	MIMAT0019815	hsa-miR-4710	hsa-miR-4710
1746	hsa-miR-4711-3p	0.314887	7.13198	1	2.4487	12.9924	0.80737	CGUGUCUUCUGGCUUGAU	experimental		mature miRNA	standard	MIMAT0019817	hsa-miR-4711-3p	hsa-miR-4711-3p
1747	hsa-miR-4711-5p	3.02424	6.90635	0.853921	2.90309	13.236	0.757857	UGCAUCAGGCCAGAAGACAUGAG	experimental		mature miRNA	standard	MIMAT0019816	hsa-miR-4711-5p	hsa-miR-4711-5p
1748	hsa-miR-4712-3p	11.5874	12.033	0.444364	4.64861	11.896	0.699982	AAUGAGAGACCUGUACUGUAU	experimental		mature miRNA	standard	MIMAT0019819	hsa-miR-4712-3p	hsa-miR-4712-3p
1749	hsa-miR-4712-5p	4.65137	10.6665	0.840708	1.06821	12.2718	0.896928	UCCAGUACAGGUCUCUCAUUUC	experimental		mature miRNA	standard	MIMAT0019818	hsa-miR-4712-5p	hsa-miR-4712-5p
1750	hsa-miR-4713-3p	2.44512	8.01394	1	0.504469	11.5244	0.879115	UGGGAUCCAGACAGUGGGAGAA	experimental		mature miRNA	standard	MIMAT0019821	hsa-miR-4713-3p	hsa-miR-4713-3p
1751	hsa-miR-4713-5p	6.98672	6.72196	0.486911	6.45873	13.2801	0.593678	UUCUCCCACUACCAGGCUCCCA	experimental		mature miRNA	standard	MIMAT0019820	hsa-miR-4713-5p	hsa-miR-4713-5p
1752	hsa-miR-4714-3p	3.08406	7.97322	0.955776	2.21	12.0797	0.781448	CCAACCUAGGUGGUCAGAGUUG	experimental		mature miRNA	standard	MIMAT0019823	hsa-miR-4714-3p	hsa-miR-4714-3p
1753	hsa-miR-4714-5p	6.67055	7.00984	0.516072	7.43727	13.9301	0.573662	AACUCUGACCCCUUAGGUUGAU	experimental		mature miRNA	standard	MIMAT0019822	hsa-miR-4714-5p	hsa-miR-4714-5p
1754	hsa-miR-4715-3p	3.89666	6.34176	0.724899	6.78537	14.7254	0.572366	GUGCCACCUUAACUGCAGCCAAU	experimental		mature miRNA	standard	MIMAT0019825	hsa-miR-4715-3p	hsa-miR-4715-3p
1755	hsa-miR-4715-5p	5.29383	7.52425	0.694224	2.38412	12.2092	0.734364	AAGUUGGCUGCAGUUAAGGUGG	experimental		mature miRNA	standard	MIMAT0019824	hsa-miR-4715-5p	hsa-miR-4715-5p
1756	hsa-miR-4716-3p	8.68663	6.77369	0.605543	0.0729725	12.2812	0.962404	AAGGGGGAAGGAAACAUGGAGA	experimental		mature miRNA	standard	MIMAT0019827	hsa-miR-4716-3p	hsa-miR-4716-3p
1757	hsa-miR-4716-5p	10.615	7.76822	0.275561	6.42656	10.9163	0.534558	UCCAUGUUUCCUUCCCCCUUCU	experimental		mature miRNA	standard	MIMAT0019826	hsa-miR-4716-5p	hsa-miR-4716-5p
1758	hsa-miR-4717-3p	8.31102	6.52548	0.383869	2.5148	14.9816	0.763403	ACACAUGGGUGGCUGUGGCCU	experimental		mature miRNA	standard	MIMAT0019830	hsa-miR-4717-3p	hsa-miR-4717-3p
1759	hsa-miR-4717-5p	8.75469	7.09185	0.301158	5.84137	14.2244	0.609778	UAGGCCACAGCCACCCAUGUGU	experimental		mature miRNA	standard	MIMAT0019829	hsa-miR-4717-5p	hsa-miR-4717-5p
1760	hsa-miR-4718	3.61591	7.43758	0.924901	0.0975766	13.7473	1	AGCUGUACCUGAAACCAAGCA	experimental		mature miRNA	standard	MIMAT0019831	hsa-miR-4718	hsa-miR-4718
1761	hsa-miR-4719	6.17542	9.40533	0.765368	0.538346	14.6051	1	UCACAAAUCUAUAAUAUGCAGG	experimental		mature miRNA	standard	MIMAT0019832	hsa-miR-4719	hsa-miR-4719
1762	hsa-miR-4720-3p	2.46383	6.8508	0.909387	5.52246	35.2001	0.73892	UGCUUAAGUUGUACCAAGUAU	experimental		mature miRNA	standard	MIMAT0019834	hsa-miR-4720-3p	hsa-miR-4720-3p
1763	hsa-miR-4720-5p	2.47927	8.47342	0.928988	0.205965	15.6676	1	CCUGGCAUAUUUGGUAUAACUU	experimental		mature miRNA	standard	MIMAT0019833	hsa-miR-4720-5p	hsa-miR-4720-5p
1764	hsa-miR-4721	5.89062	8.8612	0.603094	2.18385	14.6595	0.843372	UGAGGGCUCCAGGUGACGGUGG	experimental		mature miRNA	standard	MIMAT0019835	hsa-miR-4721	hsa-miR-4721
1765	hsa-miR-4722-3p	4.35416	10.1148	0.761838	14.5204	48.0725	0.678097	ACCUGCCAGCACCUCCCUGCAG	experimental		mature miRNA	standard	MIMAT0019837	hsa-miR-4722-3p	hsa-miR-4722-3p
1766	hsa-miR-4722-5p	4.7186	7.35668	0.806557	1.0234	12.4715	0.912794	GGCAGGAGGGCUGUGCCAGGUUG	experimental		mature miRNA	standard	MIMAT0019836	hsa-miR-4722-5p	hsa-miR-4722-5p
1767	hsa-miR-4723-3p	7.70259	7.88255	0.660496	0.626051	13.3969	0.865111	CCCUCUCUGGCUCCUCCCCAAA	experimental		mature miRNA	standard	MIMAT0019839	hsa-miR-4723-3p	hsa-miR-4723-3p
1768	hsa-miR-4723-5p	1.51431	6.74579	0.997669	0.180458	15.5393	1	UGGGGGAGCCAUGAGAUAAGAGCA	experimental		mature miRNA	standard	MIMAT0019838	hsa-miR-4723-5p	hsa-miR-4723-5p
1769	hsa-miR-4724-3p	2.64383	7.34843	1	0.331564	13.905	1	GUACCUUCUGGUUCAGCUAGU	experimental		mature miRNA	standard	MIMAT0019842	hsa-miR-4724-3p	hsa-miR-4724-3p
1770	hsa-miR-4724-5p	1.71129	7.63394	0.99883	1.4206	15.1877	0.808924	AACUGAACCAGGAGUGAGCUUCG	experimental		mature miRNA	standard	MIMAT0019841	hsa-miR-4724-5p	hsa-miR-4724-5p
1771	hsa-miR-4725-3p	5.57446	9.77679	0.796804	0.272159	15.5483	0.95813	UGGGGAAGGCGUCAGUGUCGGG	experimental		mature miRNA	standard	MIMAT0019844	hsa-miR-4725-3p	hsa-miR-4725-3p
1772	hsa-miR-4725-5p	6.20501	11.0686	0.886807	2.19406	23.1203	0.870924	AGACCCUGCAGCCUUCCCACC	experimental		mature miRNA	standard	MIMAT0019843	hsa-miR-4725-5p	hsa-miR-4725-5p
1773	hsa-miR-4726-3p	4.71216	8.81351	1	0.00404838	15.8069	1	ACCCAGGUUCCCUCUGGCCGCA	experimental		mature miRNA	standard	MIMAT0019846	hsa-miR-4726-3p	hsa-miR-4726-3p
1774	hsa-miR-4726-5p	3.22207	7.88332	0.894297	0.0399406	13.5919	1	AGGGCCAGAGGAGCCUGGAGUGG	experimental		mature miRNA	standard	MIMAT0019845	hsa-miR-4726-5p	hsa-miR-4726-5p
1775	hsa-miR-4727-3p	3.91297	7.47652	0.838988	1.54897	14.511	0.719978	AUAGUGGGAAGCUGGCAGAUUC	experimental		mature miRNA	standard	MIMAT0019848	hsa-miR-4727-3p	hsa-miR-4727-3p
1776	hsa-miR-4727-5p	2.93028	8.52046	0.832765	2.86997	13.7378	0.700819	AUCUGCCAGCUUCCACAGUGG	experimental		mature miRNA	standard	MIMAT0019847	hsa-miR-4727-5p	hsa-miR-4727-5p
1777	hsa-miR-4728-3p	6.35533	8.35242	0.530083	4.43792	13.5535	0.644702	CAUGCUGACCUCCCUCCUGCCCCAG	experimental		mature miRNA	standard	MIMAT0019850	hsa-miR-4728-3p	hsa-miR-4728-3p
1778	hsa-miR-4728-5p	9.58064	8.88535	0.365471	2.46972	12.9916	0.739009	UGGGAGGGGAGAGGCAGCAAGCA	experimental		mature miRNA	standard	MIMAT0019849	hsa-miR-4728-5p	hsa-miR-4728-5p
1779	hsa-miR-4729	3.40321	8.60062	0.895723	1.14132	14.1444	0.91866	UCAUUUAUCUGUUGGGAAGCUA	experimental		mature miRNA	standard	MIMAT0019851	hsa-miR-4729	hsa-miR-4729
1780	hsa-miR-4730	3.71128	8.73331	0.792707	1.32432	14.2908	0.912016	CUGGCGGAGCCCAUUCCAUGCCA	experimental		mature miRNA	standard	MIMAT0019852	hsa-miR-4730	hsa-miR-4730
1781	hsa-miR-4731-3p	13.0216	9.41667	0.403379	1.47669	12.2657	0.813881	CACACAAGUGGCCCCCAACACU	experimental		mature miRNA	standard	MIMAT0019854	hsa-miR-4731-3p	hsa-miR-4731-3p
1782	hsa-miR-4731-5p	8.38668	7.54464	0.60775	0.494347	10.2614	0.84048	UGCUGGGGGCCACAUGAGUGUG	experimental		mature miRNA	standard	MIMAT0019853	hsa-miR-4731-5p	hsa-miR-4731-5p
1783	hsa-miR-4732-3p	7.62431	7.49629	0.418233	2.20731	14.3927	0.770773	GCCCUGACCUGUCCUGUUCUG	experimental		mature miRNA	standard	MIMAT0019856	hsa-miR-4732-3p	hsa-miR-4732-3p
1784	hsa-miR-4732-5p	17.6836	11.0062	0.118218	11.9084	15.3168	0.465467	UGUAGAGCAGGGAGCAGGAAGCU	experimental		mature miRNA	standard	MIMAT0019855	hsa-miR-4732-5p	hsa-miR-4732-5p
1785	hsa-miR-4733-3p	9.66837	9.09315	0.372602	2.40326	12.3027	0.824859	CCACCAGGUCUAGCAUUGGGAU	experimental		mature miRNA	standard	MIMAT0019858	hsa-miR-4733-3p	hsa-miR-4733-3p
1786	hsa-miR-4733-5p	13.5694	9.25798	0.201462	5.0344	13.4206	0.537365	AAUCCCAAUGCUAGACCCGGUG	experimental		mature miRNA	standard	MIMAT0019857	hsa-miR-4733-5p	hsa-miR-4733-5p
1787	hsa-miR-4734	61230.1	2240.06	1.94092e-164	41598.4	3563.49	3.99901e-44	GCUGCGGGCUGCGGUCAGGGCG	experimental		mature miRNA	standard	MIMAT0019859	hsa-miR-4734	hsa-miR-4734
1788	hsa-miR-4735-3p	8.67642	9.81297	0.432257	20.0021	33.6119	0.398719	AAAGGUGCUCAAAUUAGACAU	experimental		mature miRNA	standard	MIMAT0019861	hsa-miR-4735-3p	hsa-miR-4735-3p
1789	hsa-miR-4735-5p	2.16935	6.50401	0.828317	6.45965	17.0937	0.615608	CCUAAUUUGAACACCUUCGGUA	experimental		mature miRNA	standard	MIMAT0019860	hsa-miR-4735-5p	hsa-miR-4735-5p
1790	hsa-miR-4736	3.01849	6.2711	0.724804	7.68659	20.3802	0.621006	AGGCAGGUUAUCUGGGCUG	experimental		mature miRNA	standard	MIMAT0019862	hsa-miR-4736	hsa-miR-4736
1791	hsa-miR-4737	1.42397	6.85509	0.900418	22.5888	48.5628	0.506421	AUGCGAGGAUGCUGACAGUG	experimental		mature miRNA	standard	MIMAT0019863	hsa-miR-4737	hsa-miR-4737
1792	hsa-miR-4738-3p	0.142509	6.56883	1	5.108	14.7415	0.514208	UGAAACUGGAGCGCCUGGAGGA	experimental		mature miRNA	standard	MIMAT0019867	hsa-miR-4738-3p	hsa-miR-4738-3p
1793	hsa-miR-4738-5p	0.573151	7.01407	1	0.908669	14.8566	0.843222	ACCAGCGCGUUUUCAGUUUCAU	experimental		mature miRNA	standard	MIMAT0019866	hsa-miR-4738-5p	hsa-miR-4738-5p
1794	hsa-miR-4739	37.8639	11.9065	0.000657293	36.027	16.7717	0.115189	AAGGGAGGAGGAGCGGAGGGGCCCU	experimental		mature miRNA	standard	MIMAT0019868	hsa-miR-4739	hsa-miR-4739
1795	hsa-miR-4740-3p	0.0243844	7.00343	1	1.42483	13.0883	0.825987	GCCCGAGAGGAUCCGUCCCUGC	experimental		mature miRNA	standard	MIMAT0019870	hsa-miR-4740-3p	hsa-miR-4740-3p
1796	hsa-miR-4740-5p	1.15556	6.79088	1	1.70994	16.6738	0.791693	AGGACUGAUCCUCUCGGGCAGG	experimental		mature miRNA	standard	MIMAT0019869	hsa-miR-4740-5p	hsa-miR-4740-5p
1797	hsa-miR-4741	30.7413	10.1524	0.00170778	40.4976	21.0667	0.106509	CGGGCUGUCCGGAGGGGUCGGCU	experimental		mature miRNA	standard	MIMAT0019871	hsa-miR-4741	hsa-miR-4741
1798	hsa-miR-4742-3p	0.0380718	7.37367	1	0.114538	15.6294	1	UCUGUAUUCUCCUUUGCCUGCAG	experimental		mature miRNA	standard	MIMAT0019873	hsa-miR-4742-3p	hsa-miR-4742-3p
1799	hsa-miR-4742-5p	0.0380718	7.28799	1	0.00262661	12.9821	1	UCAGGCAAAGGGAUAUUUACAGA	experimental		mature miRNA	standard	MIMAT0019872	hsa-miR-4742-5p	hsa-miR-4742-5p
1800	hsa-miR-4743-3p	0.0380718	6.24426	1	0.163957	16.2987	0.988133	UUUCUGUCUUUUCUGGUCCAG	experimental		mature miRNA	standard	MIMAT0022978	hsa-miR-4743-3p	hsa-miR-4743-3p
1801	hsa-miR-4743-5p	2.91062	10.0167	0.837621	2.11124	14.8164	0.811497	UGGCCGGAUGGGACAGGAGGCAU	experimental		mature miRNA	standard	MIMAT0019874	hsa-miR-4743-5p	hsa-miR-4743-5p
1802	hsa-miR-4744	0.0380718	7.49273	1	0.0984029	14.1731	0.985802	UCUAAAGACUAGACUUCGCUAUG	experimental		mature miRNA	standard	MIMAT0019875	hsa-miR-4744	hsa-miR-4744
1803	hsa-miR-4745-3p	0.0380718	5.72036	1	0.296667	14.0925	0.96575	UGGCCCGGCGACGUCUCACGGUC	experimental		mature miRNA	standard	MIMAT0019879	hsa-miR-4745-3p	hsa-miR-4745-3p
1804	hsa-miR-4745-5p	0.891126	7.03163	0.978244	2.40236	16.7234	0.796098	UGAGUGGGGCUCCCGGGACGGCG	experimental		mature miRNA	standard	MIMAT0019878	hsa-miR-4745-5p	hsa-miR-4745-5p
1805	hsa-miR-4746-3p	0.0380718	8.12772	1	0.452395	15.4821	1	AGCGGUGCUCCUGCGGGCCGA	experimental		mature miRNA	standard	MIMAT0019881	hsa-miR-4746-3p	hsa-miR-4746-3p
1806	hsa-miR-4746-5p	1.04757	6.97633	0.985934	1.30822	14.2225	0.831322	CCGGUCCCAGGAGAACCUGCAGA	experimental		mature miRNA	standard	MIMAT0019880	hsa-miR-4746-5p	hsa-miR-4746-5p
1807	hsa-miR-4747-3p	5.98566	6.67339	0.693877	3.16748	20.9376	0.689016	AAGGCCCGGGCUUUCCUCCCAG	experimental		mature miRNA	standard	MIMAT0019883	hsa-miR-4747-3p	hsa-miR-4747-3p
1808	hsa-miR-4747-5p	4.53325	8.88881	0.8182	0.00435024	13.9233	1	AGGGAAGGAGGCUUGGUCUUAG	experimental		mature miRNA	standard	MIMAT0019882	hsa-miR-4747-5p	hsa-miR-4747-5p
1809	hsa-miR-4748	1.7122	7.53393	1	2.51753	12.1688	0.657646	GAGGUUUGGGGAGGAUUUGCU	experimental		mature miRNA	standard	MIMAT0019884	hsa-miR-4748	hsa-miR-4748
1810	hsa-miR-4749-3p	9.29441	8.76502	0.313672	9.28734	16.7159	0.521658	CGCCCCUCCUGCCCCCACAG	experimental		mature miRNA	standard	MIMAT0019886	hsa-miR-4749-3p	hsa-miR-4749-3p
1811	hsa-miR-4749-5p	4.6181	10.8173	1	0.00262661	11.6788	1	UGCGGGGACAGGCCAGGGCAUC	experimental		mature miRNA	standard	MIMAT0019885	hsa-miR-4749-5p	hsa-miR-4749-5p
1812	hsa-miR-4750-3p	14.9678	9.02117	0.0986092	16.0264	13.3817	0.263228	CCUGACCCACCCCCUCCCGCAG	experimental		mature miRNA	standard	MIMAT0022979	hsa-miR-4750-3p	hsa-miR-4750-3p
1813	hsa-miR-4750-5p	1.07929	6.35801	0.968836	1.97393	13.177	0.746328	CUCGGGCGGAGGUGGUUGAGUG	experimental		mature miRNA	standard	MIMAT0019887	hsa-miR-4750-5p	hsa-miR-4750-5p
1814	hsa-miR-4751	3.78887	8.98471	0.879204	1.8585	12.7666	0.747311	AGAGGACCCGUAGCUGCUAGAAGG	experimental		mature miRNA	standard	MIMAT0019888	hsa-miR-4751	hsa-miR-4751
1815	hsa-miR-4752	0.784709	7.14919	1	1.30113	12.9012	0.783404	UUGUGGAUCUCAAGGAUGUGCU	experimental		mature miRNA	standard	MIMAT0019889	hsa-miR-4752	hsa-miR-4752
1816	hsa-miR-4753-3p	1.96264	7.56809	0.926312	0.720139	13.7247	0.828719	UUCUCUUUCUUUAGCCUUGUGU	experimental		mature miRNA	standard	MIMAT0019891	hsa-miR-4753-3p	hsa-miR-4753-3p
1817	hsa-miR-4753-5p	3.25664	6.76115	0.715764	4.92327	12.4084	0.650909	CAAGGCCAAAGGAAGAGAACAG	experimental		mature miRNA	standard	MIMAT0019890	hsa-miR-4753-5p	hsa-miR-4753-5p
1818	hsa-miR-4754	1.83846	6.86642	0.97994	2.03922	13.6477	0.730681	AUGCGGACCUGGGUUAGCGGAGU	experimental		mature miRNA	standard	MIMAT0019894	hsa-miR-4754	hsa-miR-4754
1819	hsa-miR-4755-3p	3.5098	9.05389	0.872736	1.25337	11.8745	0.767512	AGCCAGGCUCUGAAGGGAAAGU	experimental		mature miRNA	standard	MIMAT0019896	hsa-miR-4755-3p	hsa-miR-4755-3p
1820	hsa-miR-4755-5p	1.59965	6.7298	1	1.13471	12.7927	0.789786	UUUCCCUUCAGAGCCUGGCUUU	experimental		mature miRNA	standard	MIMAT0019895	hsa-miR-4755-5p	hsa-miR-4755-5p
1821	hsa-miR-4756-3p	0.0380718	5.87988	1	0.187066	14.9095	0.971253	CCAGAGAUGGUUGCCUUCCUAU	experimental		mature miRNA	standard	MIMAT0019900	hsa-miR-4756-3p	hsa-miR-4756-3p
1822	hsa-miR-4756-5p	0.0380718	6.18729	1	0.165807	14.0785	1	CAGGGAGGCGCUCACUCUCUGCU	experimental		mature miRNA	standard	MIMAT0019899	hsa-miR-4756-5p	hsa-miR-4756-5p
1823	hsa-miR-4757-3p	6.08757	10.5124	0.928093	0.00409877	12.5351	1	CAUGACGUCACAGAGGCUUCGC	experimental		mature miRNA	standard	MIMAT0019902	hsa-miR-4757-3p	hsa-miR-4757-3p
1824	hsa-miR-4757-5p	0.0380718	7.19353	1	0.0892336	12.6806	1	AGGCCUCUGUGACGUCACGGUGU	experimental		mature miRNA	standard	MIMAT0019901	hsa-miR-4757-5p	hsa-miR-4757-5p
1825	hsa-miR-4758-3p	5.63897	10.3104	0.672472	2.33015	16.1787	0.761493	UGCCCCACCUGCUGACCACCCUC	experimental		mature miRNA	standard	MIMAT0019904	hsa-miR-4758-3p	hsa-miR-4758-3p
1826	hsa-miR-4758-5p	3.62781	7.28349	0.926766	0.603126	12.676	0.983852	GUGAGUGGGAGCCGGUGGGGCUG	experimental		mature miRNA	standard	MIMAT0019903	hsa-miR-4758-5p	hsa-miR-4758-5p
1827	hsa-miR-4759	1.20346	7.88993	1	1.20007	15.4848	0.863227	UAGGACUAGAUGUUGGAAUUA	experimental		mature miRNA	standard	MIMAT0019905	hsa-miR-4759	hsa-miR-4759
1828	hsa-miR-4760-3p	0.0380718	8.45118	1	1.97983	24.1306	0.75661	AAAUUCAUGUUCAAUCUAAACC	experimental		mature miRNA	standard	MIMAT0019907	hsa-miR-4760-3p	hsa-miR-4760-3p
1829	hsa-miR-4760-5p	0.0380718	7.45551	1	0.00262661	14.6165	0.960829	UUUAGAUUGAACAUGAAGUUAG	experimental		mature miRNA	standard	MIMAT0019906	hsa-miR-4760-5p	hsa-miR-4760-5p
1830	hsa-miR-4761-3p	0.0380718	6.66112	1	0.00262661	12.7651	1	GAGGGCAUGCGCACUUUGUCC	experimental		mature miRNA	standard	MIMAT0019909	hsa-miR-4761-3p	hsa-miR-4761-3p
1831	hsa-miR-4761-5p	0.0380718	7.24524	1	0.00262661	13.205	1	ACAAGGUGUGCAUGCCUGACC	experimental		mature miRNA	standard	MIMAT0019908	hsa-miR-4761-5p	hsa-miR-4761-5p
1832	hsa-miR-4762-3p	0.0380718	7.22483	1	0.868981	18.3054	0.929568	CUUCUGAUCAAGAUUUGUGGUG	experimental		mature miRNA	standard	MIMAT0019911	hsa-miR-4762-3p	hsa-miR-4762-3p
1833	hsa-miR-4762-5p	0.0380718	6.32143	1	0.0815799	13.1809	1	CCAAAUCUUGAUCAGAAGCCU	experimental		mature miRNA	standard	MIMAT0019910	hsa-miR-4762-5p	hsa-miR-4762-5p
1834	hsa-miR-4763-3p	2.08871	8.58785	1	1.70105	13.6487	0.755814	AGGCAGGGGCUGGUGCUGGGCGGG	experimental		mature miRNA	standard	MIMAT0019913	hsa-miR-4763-3p	hsa-miR-4763-3p
1835	hsa-miR-4763-5p	1.05485	6.87587	1	0.772278	13.8971	0.852053	CGCCUGCCCAGCCCUCCUGCU	experimental		mature miRNA	standard	MIMAT0019912	hsa-miR-4763-5p	hsa-miR-4763-5p
1836	hsa-miR-4764-3p	221.465	45.6187	4.92843e-07	89.2706	47.6576	0.0105099	UUAACUCCUUUCACACCCAUGG	experimental		mature miRNA	standard	MIMAT0019915	hsa-miR-4764-3p	hsa-miR-4764-3p
1837	hsa-miR-4764-5p	3.85208	9.47378	0.75935	3.4303	12.2101	0.647216	UGGAUGUGGAAGGAGUUAUCU	experimental		mature miRNA	standard	MIMAT0019914	hsa-miR-4764-5p	hsa-miR-4764-5p
1838	hsa-miR-4765	2.60346	7.85407	1	0.422559	12.9059	0.923579	UGAGUGAUUGAUAGCUAUGUUC	experimental		mature miRNA	standard	MIMAT0019916	hsa-miR-4765	hsa-miR-4765
1839	hsa-miR-4766-3p	0.608807	6.88295	1	0.851338	11.0772	0.784095	AUAGCAAUUGCUCUUUUGGAA	experimental		mature miRNA	standard	MIMAT0019918	hsa-miR-4766-3p	hsa-miR-4766-3p
1840	hsa-miR-4766-5p	4.12461	9.99365	1	0.862917	10.994	0.754354	UCUGAAAGAGCAGUUGGUGUU	experimental		mature miRNA	standard	MIMAT0019917	hsa-miR-4766-5p	hsa-miR-4766-5p
1841	hsa-miR-4767	3.76386	7.16905	0.685989	9.33015	30.3769	0.603996	CGCGGGCGCUCCUGGCCGCCGCC	experimental		mature miRNA	standard	MIMAT0019919	hsa-miR-4767	hsa-miR-4767
1842	hsa-miR-4768-3p	0.997629	6.87689	1	3.361	13.7695	0.672129	CCAGGAGAUCCAGAGAGAAU	experimental		mature miRNA	standard	MIMAT0019921	hsa-miR-4768-3p	hsa-miR-4768-3p
1843	hsa-miR-4768-5p	3.59103	8.62379	0.875962	0.899859	12.3963	0.825156	AUUCUCUCUGGAUCCCAUGGAU	experimental		mature miRNA	standard	MIMAT0019920	hsa-miR-4768-5p	hsa-miR-4768-5p
1844	hsa-miR-4769-3p	12.3507	7.49376	0.100007	12.2758	12.9333	0.259876	UCUGCCAUCCUCCCUCCCCUAC	experimental		mature miRNA	standard	MIMAT0019923	hsa-miR-4769-3p	hsa-miR-4769-3p
1845	hsa-miR-4769-5p	4.86525	6.80764	0.557526	4.83552	12.6283	0.574613	GGUGGGAUGGAGAGAAGGUAUGAG	experimental		mature miRNA	standard	MIMAT0019922	hsa-miR-4769-5p	hsa-miR-4769-5p
1846	hsa-miR-4770	1.51089	5.4492	0.849953	4.67075	12.8861	0.642977	UGAGAUGACACUGUAGCU	experimental		mature miRNA	standard	MIMAT0019924	hsa-miR-4770	hsa-miR-4770
1847	hsa-miR-4771	2.37153	6.72829	0.858499	4.80849	14.6569	0.627029	AGCAGACUUGACCUACAAUUA	experimental		mature miRNA	standard	MIMAT0019925	hsa-miR-4771	hsa-miR-4771
1848	hsa-miR-4772-3p	1.87379	6.67721	0.850466	2.8496	13.1553	0.74577	CCUGCAACUUUGCCUGAUCAGA	experimental		mature miRNA	standard	MIMAT0019927	hsa-miR-4772-3p	hsa-miR-4772-3p
1849	hsa-miR-4772-5p	3.90515	6.23794	0.628703	4.70655	15.4073	0.706662	UGAUCAGGCAAAAUUGCAGACU	experimental		mature miRNA	standard	MIMAT0019926	hsa-miR-4772-5p	hsa-miR-4772-5p
1850	hsa-miR-4773	2.14996	6.77528	0.807106	7.29748	14.424	0.604437	CAGAACAGGAGCAUAGAAAGGC	experimental		mature miRNA	standard	MIMAT0019928	hsa-miR-4773	hsa-miR-4773
1851	hsa-miR-4774-3p	0.0214623	6.27194	1	3.12877	14.5355	0.63865	AUUGCCUAACAUGUGCCAGAA	experimental		mature miRNA	standard	MIMAT0019930	hsa-miR-4774-3p	hsa-miR-4774-3p
1852	hsa-miR-4774-5p	1.12215	6.17748	1	2.37795	13.4306	0.763484	UCUGGUAUGUAGUAGGUAAUAA	experimental		mature miRNA	standard	MIMAT0019929	hsa-miR-4774-5p	hsa-miR-4774-5p
1853	hsa-miR-4775	0.0221939	5.62982	1	4.50366	22.1954	0.585807	UUAAUUUUUUGUUUCGGUCACU	experimental		mature miRNA	standard	MIMAT0019931	hsa-miR-4775	hsa-miR-4775
1854	hsa-miR-4776-3p	3.38698	8.61984	0.896637	1.15214	12.7404	0.814248	CUUGCCAUCCUGGUCCACUGCAU	experimental		mature miRNA	standard	MIMAT0019933	hsa-miR-4776-3p	hsa-miR-4776-3p
1855	hsa-miR-4776-5p	1.15829	6.68587	0.929711	3.77384	12.1106	0.650969	GUGGACCAGGAUGGCAAGGGCU	experimental		mature miRNA	standard	MIMAT0019932	hsa-miR-4776-5p	hsa-miR-4776-5p
1856	hsa-miR-4777-3p	12.6352	21.2079	0.642719	1.43596	16.3257	0.817343	AUACCUCAUCUAGAAUGCUGUA	experimental		mature miRNA	standard	MIMAT0019935	hsa-miR-4777-3p	hsa-miR-4777-3p
1857	hsa-miR-4777-5p	1.13307	6.44729	1	3.491	15.4223	0.736439	UUCUAGAUGAGAGAUAUAUAUA	experimental		mature miRNA	standard	MIMAT0019934	hsa-miR-4777-5p	hsa-miR-4777-5p
1858	hsa-miR-4778-3p	3.20409	8.43818	0.91737	3.72535	13.3224	0.680105	UCUUCUUCCUUUGCAGAGUUGA	experimental		mature miRNA	standard	MIMAT0019937	hsa-miR-4778-3p	hsa-miR-4778-3p
1859	hsa-miR-4778-5p	38.7135	15.6306	0.0102957	25.7066	29.8323	0.365855	AAUUCUGUAAAGGAAGAAGAGG	experimental		mature miRNA	standard	MIMAT0019936	hsa-miR-4778-5p	hsa-miR-4778-5p
1860	hsa-miR-4779	1.94928	8.07035	1	4.07914	13.4499	0.595936	UAGGAGGGAAUAGUAAAAGCAG	experimental		mature miRNA	standard	MIMAT0019938	hsa-miR-4779	hsa-miR-4779
1861	hsa-miR-4780	0.0380718	6.99079	1	0.00262661	13.8581	0.993534	ACCCUUGAGCCUGAUCCCUAGC	experimental		mature miRNA	standard	MIMAT0019939	hsa-miR-4780	hsa-miR-4780
1862	hsa-miR-4781-3p	0.53849	5.86077	1	1.73161	13.9989	0.749926	AAUGUUGGAAUCCUCGCUAGAG	experimental		mature miRNA	standard	MIMAT0019943	hsa-miR-4781-3p	hsa-miR-4781-3p
1863	hsa-miR-4781-5p	0.021905	6.95041	1	2.42844	14.2489	0.717238	UAGCGGGGAUUCCAAUAUUGG	experimental		mature miRNA	standard	MIMAT0019942	hsa-miR-4781-5p	hsa-miR-4781-5p
1864	hsa-miR-4782-3p	0.0237014	7.25131	1	2.82761	14.0767	0.686135	UGAUUGUCUUCAUAUCUAGAAC	experimental		mature miRNA	standard	MIMAT0019945	hsa-miR-4782-3p	hsa-miR-4782-3p
1865	hsa-miR-4782-5p	0.0211548	6.50214	1	2.65637	14.5333	0.6797	UUCUGGAUAUGAAGACAAUCAA	experimental		mature miRNA	standard	MIMAT0019944	hsa-miR-4782-5p	hsa-miR-4782-5p
1866	hsa-miR-4783-3p	1.75764	8.27158	0.976218	6.42194	15.0943	0.512043	CCCCGGUGUUGGGGCGCGUCUGC	experimental		mature miRNA	standard	MIMAT0019947	hsa-miR-4783-3p	hsa-miR-4783-3p
1867	hsa-miR-4783-5p	3.46217	7.54406	0.70833	7.64398	14.7162	0.500949	GGCGCGCCCAGCUCCCGGGCU	experimental		mature miRNA	standard	MIMAT0019946	hsa-miR-4783-5p	hsa-miR-4783-5p
1868	hsa-miR-4784	3.61182	7.82021	0.815547	6.88204	14.0549	0.45255	UGAGGAGAUGCUGGGACUGA	experimental		mature miRNA	standard	MIMAT0019948	hsa-miR-4784	hsa-miR-4784
1869	hsa-miR-4785	0.743998	7.54691	1	3.11527	11.8191	0.62534	AGAGUCGGCGACGCCGCCAGC	experimental		mature miRNA	standard	MIMAT0019949	hsa-miR-4785	hsa-miR-4785
1870	hsa-miR-4786-3p	2.16938	8.28435	0.89541	8.24536	13.5401	0.433796	UGAAGCCAGCUCUGGUCUGGGC	experimental		mature miRNA	standard	MIMAT0019955	hsa-miR-4786-3p	hsa-miR-4786-3p
1871	hsa-miR-4786-5p	1.05319	6.74778	0.998135	5.86822	16.084	0.641265	UGAGACCAGGACUGGAUGCACC	experimental		mature miRNA	standard	MIMAT0019954	hsa-miR-4786-5p	hsa-miR-4786-5p
1872	hsa-miR-4787-3p	4.17369	7.86764	0.652438	10.1595	14.6186	0.369439	GAUGCGCCGCCCACUGCCCCGCGC	experimental		mature miRNA	standard	MIMAT0019957	hsa-miR-4787-3p	hsa-miR-4787-3p
1873	hsa-miR-4787-5p	2886.48	164.975	3.23893e-69	3216.18	212.927	3.78704e-17	GCGGGGGUGGCGGCGGCAUCCC	experimental		mature miRNA	standard	MIMAT0019956	hsa-miR-4787-5p	hsa-miR-4787-5p
1874	hsa-miR-4788	2.0869	7.6875	0.846073	15.2486	28.9486	0.473554	UUACGGACCAGCUAAGGGAGGC	experimental		mature miRNA	standard	MIMAT0019958	hsa-miR-4788	hsa-miR-4788
1875	hsa-miR-4789-3p	0.892736	7.08176	1	3.82231	13.4616	0.58898	CACACAUAGCAGGUGUAUAUA	experimental		mature miRNA	standard	MIMAT0019960	hsa-miR-4789-3p	hsa-miR-4789-3p
1876	hsa-miR-4789-5p	3.4689	8.78236	0.92944	6.68947	12.2067	0.421779	GUAUACACCUGAUAUGUGUAUG	experimental		mature miRNA	standard	MIMAT0019959	hsa-miR-4789-5p	hsa-miR-4789-5p
1877	hsa-miR-4790-3p	1.80017	6.61215	0.84162	11.8369	16.8537	0.435169	UGAAUGGUAAAGCGAUGUCACA	experimental		mature miRNA	standard	MIMAT0019962	hsa-miR-4790-3p	hsa-miR-4790-3p
1878	hsa-miR-4790-5p	0.714172	6.53686	0.967146	10.1275	15.386	0.380608	AUCGCUUUACCAUUCAUGUU	experimental		mature miRNA	standard	MIMAT0019961	hsa-miR-4790-5p	hsa-miR-4790-5p
1879	hsa-miR-4791	12.3749	10.5978	0.25562	15.5089	15.2194	0.303087	UGGAUAUGAUGACUGAAA	experimental		mature miRNA	standard	MIMAT0019963	hsa-miR-4791	hsa-miR-4791
1880	hsa-miR-4792	1.70711	7.74029	1	7.21918	20.7604	0.559116	CGGUGAGCGCUCGCUGGC	experimental		mature miRNA	standard	MIMAT0019964	hsa-miR-4792	hsa-miR-4792
1881	hsa-miR-4793-3p	2.83653	7.81809	1	0.00262661	16.3789	1	UCUGCACUGUGAGUUGGCUGGCU	experimental		mature miRNA	standard	MIMAT0019966	hsa-miR-4793-3p	hsa-miR-4793-3p
1882	hsa-miR-4793-5p	2.70225	7.18623	1	0.215704	14.3183	1	ACAUCCUGCUCCACAGGGCAGAGG	experimental		mature miRNA	standard	MIMAT0019965	hsa-miR-4793-5p	hsa-miR-4793-5p
1883	hsa-miR-4794	0.0380718	7.15223	1	0.00262661	13.911	1	UCUGGCUAUCUCACGAGACUGU	experimental		mature miRNA	standard	MIMAT0019967	hsa-miR-4794	hsa-miR-4794
1884	hsa-miR-4795-3p	0.0380718	8.25018	1	0.00262661	16.6234	1	AUAUUAUUAGCCACUUCUGGAU	experimental		mature miRNA	standard	MIMAT0019969	hsa-miR-4795-3p	hsa-miR-4795-3p
1885	hsa-miR-4795-5p	0.416024	7.12856	1	0.497146	14.2387	0.958612	AGAAGUGGCUAAUAAUAUUGA	experimental		mature miRNA	standard	MIMAT0019968	hsa-miR-4795-5p	hsa-miR-4795-5p
1886	hsa-miR-4796-3p	0.0380718	6.79726	1	0.00262661	11.9045	1	UAAAGUGGCAGAGUAUAGACAC	experimental		mature miRNA	standard	MIMAT0019971	hsa-miR-4796-3p	hsa-miR-4796-3p
1887	hsa-miR-4796-5p	0.0380718	5.54645	1	0.00262661	13.8534	1	UGUCUAUACUCUGUCACUUUAC	experimental		mature miRNA	standard	MIMAT0019970	hsa-miR-4796-5p	hsa-miR-4796-5p
1888	hsa-miR-4797-3p	3.91563	9.55814	1	0.247016	14.7735	1	UCUCAGUAAGUGGCACUCUGU	experimental		mature miRNA	standard	MIMAT0019973	hsa-miR-4797-3p	hsa-miR-4797-3p
1889	hsa-miR-4797-5p	1.17732	8.3348	1	0.0280172	13.8048	1	GACAGAGUGCCACUUACUGAA	experimental		mature miRNA	standard	MIMAT0019972	hsa-miR-4797-5p	hsa-miR-4797-5p
1890	hsa-miR-4798-3p	0.522888	6.57689	1	0.0103178	14.1622	1	AACUCACGAAGUAUACCGAAGU	experimental		mature miRNA	standard	MIMAT0019975	hsa-miR-4798-3p	hsa-miR-4798-3p
1891	hsa-miR-4798-5p	1.90739	7.11783	1	0.00262661	14.1662	1	UUCGGUAUACUUUGUGAAUUGG	experimental		mature miRNA	standard	MIMAT0019974	hsa-miR-4798-5p	hsa-miR-4798-5p
1892	hsa-miR-4799-3p	1.08015	6.54866	1	0.00262661	15.5549	1	ACUGGCAUGCUGCAUUUAUAUA	experimental		mature miRNA	standard	MIMAT0019977	hsa-miR-4799-3p	hsa-miR-4799-3p
1893	hsa-miR-4799-5p	0.0380718	6.91706	1	0.00262661	12.7476	1	AUCUAAAUGCAGCAUGCCAGUC	experimental		mature miRNA	standard	MIMAT0019976	hsa-miR-4799-5p	hsa-miR-4799-5p
1894	hsa-miR-4800-3p	313.25	46.3963	6.80414e-12	201.774	41.471	5.10302e-06	CAUCCGUCCGUCUGUCCAC	experimental		mature miRNA	standard	MIMAT0019979	hsa-miR-4800-3p	hsa-miR-4800-3p
1895	hsa-miR-4800-5p	4.00427	7.67401	0.688864	3.66866	15.4386	0.783207	AGUGGACCGAGGAAGGAAGGA	experimental		mature miRNA	standard	MIMAT0019978	hsa-miR-4800-5p	hsa-miR-4800-5p
1896	hsa-miR-4801	4.82596	7.12974	0.772468	0.0426284	13.7702	1	UACACAAGAAAACCAAGGCUCA	experimental		mature miRNA	standard	MIMAT0019980	hsa-miR-4801	hsa-miR-4801
1897	hsa-miR-4802-3p	1.34689	7.55303	0.884055	1.5792	13.7295	0.837378	UACAUGGAUGGAAACCUUCAAGC	experimental		mature miRNA	standard	MIMAT0019982	hsa-miR-4802-3p	hsa-miR-4802-3p
1898	hsa-miR-4802-5p	3.36831	6.60875	0.809215	0.254309	12.411	0.953743	UAUGGAGGUUCUAGACCAUGUU	experimental		mature miRNA	standard	MIMAT0019981	hsa-miR-4802-5p	hsa-miR-4802-5p
1899	hsa-miR-4803	3.40446	6.93837	0.662353	1.21603	14.282	0.871217	UAACAUAAUAGUGUGGAUUGA	experimental		mature miRNA	standard	MIMAT0019983	hsa-miR-4803	hsa-miR-4803
1900	hsa-miR-4804-3p	6.2139	6.99527	0.593904	0.322858	11.1332	0.939285	UGCUUAACCUUGCCCUCGAAA	experimental		mature miRNA	standard	MIMAT0019985	hsa-miR-4804-3p	hsa-miR-4804-3p
1901	hsa-miR-4804-5p	0.0380718	5.55719	1	0.00262661	13.268	1	UUGGACGGUAAGGUUAAGCAA	experimental		mature miRNA	standard	MIMAT0019984	hsa-miR-4804-5p	hsa-miR-4804-5p
1902	hsa-miR-4999-3p	4.58225	10.157	0.959058	0.00262661	16.2622	1	UCACUACCUGACAAUACAGU	experimental		mature miRNA	standard	MIMAT0021018	hsa-miR-4999-3p	hsa-miR-4999-3p
1903	hsa-miR-4999-5p	0.0380718	6.43242	1	0.0662427	11.1934	1	UGCUGUAUUGUCAGGUAGUGA	experimental		mature miRNA	standard	MIMAT0021017	hsa-miR-4999-5p	hsa-miR-4999-5p
1904	hsa-miR-5000-3p	1.23871	8.44796	1	0.00262661	13.2522	1	UCAGGACACUUCUGAACUUGGA	experimental		mature miRNA	standard	MIMAT0021020	hsa-miR-5000-3p	hsa-miR-5000-3p
1905	hsa-miR-5000-5p	2.6285	7.08828	0.960459	0.00413649	14.1469	1	CAGUUCAGAAGUGUUCCUGAGU	experimental		mature miRNA	standard	MIMAT0021019	hsa-miR-5000-5p	hsa-miR-5000-5p
1906	hsa-miR-5001-3p	0.0380718	6.45488	1	0.00262661	14.3191	1	UUCUGCCUCUGUCCAGGUCCUU	experimental		mature miRNA	standard	MIMAT0021022	hsa-miR-5001-3p	hsa-miR-5001-3p
1907	hsa-miR-5001-5p	863.42	105.022	8.72821e-15	608.374	75.9019	4.55551e-25	AGGGCUGGACUCAGCGGCGGAGCU	experimental		mature miRNA	standard	MIMAT0021021	hsa-miR-5001-5p	hsa-miR-5001-5p
1908	hsa-miR-5002-3p	1.18751	7.92056	1	0.00262661	14.1081	1	UGACUGCCUCACUGACCACUU	experimental		mature miRNA	standard	MIMAT0021024	hsa-miR-5002-3p	hsa-miR-5002-3p
1909	hsa-miR-5002-5p	0.0380718	8.23257	1	0.126515	13.4131	1	AAUUUGGUUUCUGAGGCACUUAGU	experimental		mature miRNA	standard	MIMAT0021023	hsa-miR-5002-5p	hsa-miR-5002-5p
1910	hsa-miR-5003-3p	0.0380718	7.43945	1	0.00262661	15.8389	1	UACUUUUCUAGGUUGUUGGGG	experimental		mature miRNA	standard	MIMAT0021026	hsa-miR-5003-3p	hsa-miR-5003-3p
1911	hsa-miR-5003-5p	0.0380718	6.83807	1	0.00262661	14.6093	1	UCACAACAACCUUGCAGGGUAGA	experimental		mature miRNA	standard	MIMAT0021025	hsa-miR-5003-5p	hsa-miR-5003-5p
1912	hsa-miR-5004-3p	0.0380718	6.71985	1	0.00262661	13.5255	1	CUUGGAUUUUCCUGGGCCUCAG	experimental		mature miRNA	standard	MIMAT0021028	hsa-miR-5004-3p	hsa-miR-5004-3p
1913	hsa-miR-5004-5p	0.568845	7.28671	1	0.00262661	13.7173	1	UGAGGACAGGGCAAAUUCACGA	experimental		mature miRNA	standard	MIMAT0021027	hsa-miR-5004-5p	hsa-miR-5004-5p
1914	hsa-miR-5006-3p	0.0380718	6.21958	1	0.00262661	13.8229	1	UUUCCCUUUCCAUCCUGGCAG	experimental		mature miRNA	standard	MIMAT0021034	hsa-miR-5006-3p	hsa-miR-5006-3p
1915	hsa-miR-5006-5p	3.78067	7.54628	0.807571	0.0409125	15.6991	1	UUGCCAGGGCAGGAGGUGGAA	experimental		mature miRNA	standard	MIMAT0021033	hsa-miR-5006-5p	hsa-miR-5006-5p
1916	hsa-miR-5007-3p	0.0380718	6.47047	1	0.00262661	12.1434	1	AUCAUAUGAACCAAACUCUAAU	experimental		mature miRNA	standard	MIMAT0021036	hsa-miR-5007-3p	hsa-miR-5007-3p
1917	hsa-miR-5007-5p	0.287217	7.86422	1	0.00262661	15.9185	1	UAGAGUCUGGCUGAUAUGGUUU	experimental		mature miRNA	standard	MIMAT0021035	hsa-miR-5007-5p	hsa-miR-5007-5p
1918	hsa-miR-5008-3p	1.38525	7.64011	1	0.00262661	14.3437	1	CCUGUGCUCCCAGGGCCUCGC	experimental		mature miRNA	standard	MIMAT0021040	hsa-miR-5008-3p	hsa-miR-5008-3p
1919	hsa-miR-5008-5p	0.0380718	7.46741	1	0.00262661	13.2073	1	UGAGGCCCUUGGGGCACAGUGG	experimental		mature miRNA	standard	MIMAT0021039	hsa-miR-5008-5p	hsa-miR-5008-5p
1920	hsa-miR-5009-3p	3.45596	9.65063	1	0.00262661	14.4535	1	UCCUAAAUCUGAAAGUCCAAAA	experimental		mature miRNA	standard	MIMAT0021042	hsa-miR-5009-3p	hsa-miR-5009-3p
1921	hsa-miR-5009-5p	1.23752	7.56336	0.935452	0.0386994	12.8409	1	UUGGACUUUUUCAGAUUUGGGGAU	experimental		mature miRNA	standard	MIMAT0021041	hsa-miR-5009-5p	hsa-miR-5009-5p
1922	hsa-miR-5010-3p	4.00611	7.32128	0.67239	1.21392	13.8833	0.808801	UUUUGUGUCUCCCAUUCCCCAG	experimental		mature miRNA	standard	MIMAT0021044	hsa-miR-5010-3p	hsa-miR-5010-3p
1923	hsa-miR-5010-5p	9.84577	7.16911	0.226387	3.93932	14.677	0.668993	AGGGGGAUGGCAGAGCAAAAUU	experimental		mature miRNA	standard	MIMAT0021043	hsa-miR-5010-5p	hsa-miR-5010-5p
1924	hsa-miR-5011-3p	0.597514	7.49647	1	0.00262661	12.193	1	GUGCAUGGCUGUAUAUAUAACA	experimental		mature miRNA	standard	MIMAT0021046	hsa-miR-5011-3p	hsa-miR-5011-3p
1925	hsa-miR-5011-5p	6.57389	7.59059	0.477646	2.44041	15.0656	0.801361	UAUAUAUACAGCCAUGCACUC	experimental		mature miRNA	standard	MIMAT0021045	hsa-miR-5011-5p	hsa-miR-5011-5p
1926	hsa-miR-5047	0.605943	6.55894	1	0.00262661	14.3213	1	UUGCAGCUGCGGUUGUAAGGU	experimental		mature miRNA	standard	MIMAT0020541	hsa-miR-5047	hsa-miR-5047
1927	hsa-miR-5087	0.0380718	6.30274	1	0.00262661	13.9595	1	GGGUUUGUAGCUUUGCUGGCAUG	experimental		mature miRNA	standard	MIMAT0021079	hsa-miR-5087	hsa-miR-5087
1928	hsa-miR-5088-3p	1.09233	6.2674	1	0.00262661	15.2254	1	UCCCUUCUUCCUGGGCCCUCA	experimental		mature miRNA	standard	MIMAT0027041	hsa-miR-5088-3p	hsa-miR-5088-3p
1929	hsa-miR-5088-5p	0.0380718	7.66728	1	0.0875011	15.3575	1	CAGGGCUCAGGGAUUGGAUGGAGG	experimental		mature miRNA	standard	MIMAT0021080	hsa-miR-5088-5p	hsa-miR-5088-5p
1930	hsa-miR-5089-3p	2.91696	7.95353	0.930017	0.00385738	13.8083	1	AUGCUACUCGGAAAUCCCACUGA	experimental		mature miRNA	standard	MIMAT0022984	hsa-miR-5089-3p	hsa-miR-5089-3p
1931	hsa-miR-5089-5p	0.0380718	7.4973	1	0.131987	16.0689	1	GUGGGAUUUCUGAGUAGCAUC	experimental		mature miRNA	standard	MIMAT0021081	hsa-miR-5089-5p	hsa-miR-5089-5p
1932	hsa-miR-5090	3.55761	9.07029	0.924478	0.0897486	13.3878	1	CCGGGGCAGAUUGGUGUAGGGUG	experimental		mature miRNA	standard	MIMAT0021082	hsa-miR-5090	hsa-miR-5090
[truncated: 672 more rows]
